# Supplementary material for: Plant Growth-Promoting Bacillus Strains Modulate Early Soybean Development via Proteome Remodelling
Source: Research Square preprint supplement (doi:10.21203/rs.3.rs-7602726/v1), 2025-10-07
Supplement: Supplementary file 1 [file e126084373a26ed7bac850bc.xlsx]

## Sheet: Details
Table 1:Label-Free Quantification (LFQ) intensities and corresponding spectral annotations
Table 2 : Significant difference proteins HT3_vs_control
Table 3: Functional enrichment of differentially abundant proteins in soybean leaves in response to Bacillus treatments

## Sheet: Table 1
Control 1	Control 2	Control 3	HT-1-1	HT-1-2	HT-1-3	HT-2-1	HT-2-2	HT-2-3	HT-3-1	HT-3-2	HT-3-3	Only identified by site	Reverse	Potential contaminant	Taxonomy IDs	Taxonomy names	GOBP name	GOMF name	GOCC name	GOBP slim name	GOCC slim name	KEGG name	Pfam	GSEA	Keywords	Corum	GOBP	GOMF	GOCC	GOBP slim	GOCC slim	Peptides	Razor + unique peptides	Unique peptides	Sequence coverage [%]	Unique + razor sequence coverage [%]	Unique sequence coverage [%]	Mol. weight [kDa]	Q-value	Score	Intensity	MS/MS count	Number Of Imputations	Protein IDs	Majority protein IDs	id	ENSG	ENSP	ENST
#!{Type}E	E	E	E	E	E	E	E	E	E	E	E	C	C	C	C	C	C	C	C	C	C	C	C	C	C	C	C	C	C	C	C	N	N	N	N	N	N	N	N	N	N	N	N	T	T	T	T	T	T
#!{C:Grouping1}Control	Control	Control	Bacillus-HT1	Bacillus-HT1	Bacillus-HT1	Bacillus-HT2	Bacillus-HT2	Bacillus-HT2	Bacillus-HT3	Bacillus-HT3	Bacillus-HT3
16.8526	16.4632	18.7587	15.9957	18.4321	16.0699	18.778	18.8263	18.8285	15.8988	15.9886	19.6678				-1				cellular anatomical entity;membrane		cellular anatomical entity;membrane		Rhodanese		Membrane;Referenceproteome;Transmembrane;Transmembranehelix				GO:0016020;GO:0110165		GO:0016020;GO:0110165	3	3	3	21.6	21.6	21.6	19.994	0.0012156	2.2592	4974700	7	6	A0A088AWU8;K7LNM8;C6SX67;C6SXE2	A0A088AWU8;K7LNM8;C6SX67;C6SXE2	1	GLYMA_01G161500;GLYMA_11G082300	KRH28873;KRH76577	KRH28873;KRH76577
16.7978	15.6129	15.9533	15.868	15.7273	15.4759	16.9078	16.2568	16.2591	16.486	16.372	16.8074				-1		alpha-amino acid biosynthetic process;alpha-amino acid metabolic process;amino acid biosynthetic process;amino acid metabolic process;aspartate family amino acid biosynthetic process;aspartate family amino acid metabolic process;biosynthetic process;carboxylic acid biosynthetic process;carboxylic acid metabolic process;cellular biosynthetic process;cellular metabolic process;cellular process;meta…	adenyl nucleotide binding;adenyl ribonucleotide binding;amino acid kinase activity;anion binding;ATP binding;binding;carbohydrate derivative binding;catalytic activity;heterocyclic compound binding;homoserine kinase activity;ion binding;kinase activity;nucleoside phosphate binding;nucleotide binding;organic cyclic compound binding;phosphotransferase activity, alcohol group as acceptor;purine nucl…		amino acid metabolic process;biosynthetic process;cellular process;metabolic process;nitrogen compound metabolic process;organic acid metabolic process;phosphorus metabolic process;phosphorylation;primary metabolic process;small molecule metabolic process			GHMP_kinases_C;GHMP_kinases_N		Amino-acidbiosynthesis;ATP-binding;Kinase;Nucleotide-binding;Referenceproteome;Threoninebiosynthesis;Transferase		GO:0006082;GO:0006520;GO:0006566;GO:0006793;GO:0006796;GO:0006807;GO:0008152;GO:0008652;GO:0009058;GO:0009066;GO:0009067;GO:0009088;GO:0009987;GO:0016053;GO:0016310;GO:0019752;GO:0043436;GO:0044237;GO:0044238;GO:0044249;GO:0044281;GO:0044283;GO:0046394;GO:0071704;GO:1901564;GO:1901566;GO:1901576;GO:1901605;GO:1901607	GO:0000166;GO:0003824;GO:0004413;GO:0005488;GO:0005524;GO:0016301;GO:0016740;GO:0016772;GO:0016773;GO:0017076;GO:0019202;GO:0030554;GO:0032553;GO:0032555;GO:0032559;GO:0035639;GO:0036094;GO:0043167;GO:0043168;GO:0097159;GO:0097367;GO:1901265;GO:1901363		GO:0006082;GO:0006520;GO:0006793;GO:0006807;GO:0008152;GO:0009058;GO:0009987;GO:0016310;GO:0044238;GO:0044281		2	2	2	12.7	12.7	12.7	32.832	0	15.709	1089300	22	1	A0A097PK86;D2DKF1	A0A097PK86;D2DKF1	2	GLYMA_14G001000	KRH14011	KRH14011
18.9407	19.419	19.152	19.3032	19.0833	19.1845	19.028	19.1255	19.1277	19.7871	18.9781	19.6185				-1		alpha-amino acid metabolic process;amino acid metabolic process;asparagine metabolic process;aspartate family amino acid metabolic process;carboxylic acid metabolic process;cellular metabolic process;cellular process;dicarboxylic acid metabolic process;glutamine family amino acid metabolic process;glutamine metabolic process;metabolic process;nitrogen compound metabolic process;organic acid metab…	acyltransferase activity;catalytic activity;hydrolase activity;hydrolase activity, acting on carbon-nitrogen (but not peptide) bonds;hydrolase activity, acting on carbon-nitrogen (but not peptide) bonds, in linear amides;omega-amidase activity;transferase activity		amino acid metabolic process;cellular process;metabolic process;nitrogen compound metabolic process;organic acid metabolic process;primary metabolic process;small molecule metabolic process			CN_hydrolase		Acyltransferase;Hydrolase;Lipoprotein;Referenceproteome;Transferase		GO:0006082;GO:0006107;GO:0006520;GO:0006528;GO:0006541;GO:0006807;GO:0008152;GO:0009064;GO:0009066;GO:0009987;GO:0019752;GO:0043436;GO:0043648;GO:0044237;GO:0044238;GO:0044281;GO:0071704;GO:1901564;GO:1901605	GO:0003824;GO:0016740;GO:0016746;GO:0016787;GO:0016810;GO:0016811;GO:0050152		GO:0006082;GO:0006520;GO:0006807;GO:0008152;GO:0009987;GO:0044238;GO:0044281		4	4	4	17.3	17.3	17.3	32.593	0	72.13	13698000	11	0	A0A097PL84;I1K8F4	A0A097PL84;I1K8F4	3	GLYMA_06G055100	KRH52237	KRH52237
17.057	17.4204	17.0233	16.861	16.736	17.2445	16.3157	16.7345	15.4025	16.0886	14.9098	16.4467				-1										Disulfidebond;Referenceproteome;Signal							1	1	1	10.1	10.1	10.1	19.092	0	11.882	900790	10	3	A0A097PSS0;I1KJU5;I1J4C8	A0A097PSS0;I1KJU5;I1J4C8	4	GLYMA_01G003700;GLYMA_07G128200	KRH49042;KRH74165	KRH49042;KRH74165
12.9546	13.6396	15.2688	14.0527	14.3955	15.1935	15.3582	14.7953	14.7976	16.9164	15.6551	14.2305				-1			binding;endopeptidase activator activity;endopeptidase regulator activity;enzyme activator activity;enzyme regulator activity;molecular function activator activity;molecular function regulator activity;peptidase activator activity;peptidase regulator activity;proteasome binding;protein-containing complex binding	catalytic complex;cellular anatomical entity;cytoplasm;endopeptidase complex;intracellular membrane-bounded organelle;intracellular organelle;intracellular protein-containing complex;membrane-bounded organelle;nucleus;organelle;peptidase complex;proteasome complex;proteasome regulatory particle, lid subcomplex;protein-containing complex		catalytic complex;cellular anatomical entity;cytoplasm;intracellular membrane-bounded organelle;intracellular organelle;nucleus;organelle;proteasome complex;protein-containing complex		Proteasom_Rpn13;RPN13_C		Cytoplasm;Nucleus;Proteasome;Referenceproteome			GO:0005488;GO:0008047;GO:0016504;GO:0030234;GO:0044877;GO:0061133;GO:0061134;GO:0061135;GO:0070628;GO:0098772;GO:0140677	GO:0000502;GO:0005634;GO:0005737;GO:0008541;GO:0032991;GO:0043226;GO:0043227;GO:0043229;GO:0043231;GO:0110165;GO:0140535;GO:1902494;GO:1905368;GO:1905369		GO:0000502;GO:0005634;GO:0005737;GO:0032991;GO:0043226;GO:0043229;GO:0043231;GO:0110165;GO:1902494	1	1	1	5.1	5.1	5.1	35.055	0	3.8917	253040	8	2	A0A097PT03;A0A0R0JZP8;I1KPP9;I1KPP8;I1K657	A0A097PT03;A0A0R0JZP8;I1KPP9;I1KPP8;I1K657	5	GLYMA_05G220700;GLYMA_08G027200	KRH41393;KRH41394;KRH60109;KRH60110	KRH41393;KRH41394;KRH60109;KRH60110
20.9054	23.0565	21.603	22.9897	22.965	21.5582	22.8899	22.3741	22.3763	22.607	23.0646	23.5464				-1		carbohydrate catabolic process;carbohydrate metabolic process;catabolic process;glucan catabolic process;glucan metabolic process;macromolecule catabolic process;macromolecule metabolic process;metabolic process;organic substance catabolic process;organic substance metabolic process;polysaccharide catabolic process;polysaccharide metabolic process;primary metabolic process	beta-glucosidase activity;catalytic activity;glucosidase activity;hydrolase activity;hydrolase activity, acting on glycosyl bonds;hydrolase activity, hydrolyzing O-glycosyl compounds;scopolin beta-glucosidase activity	cellular anatomical entity;extracellular region	carbohydrate metabolic process;catabolic process;macromolecule catabolic process;macromolecule metabolic process;metabolic process;polysaccharide metabolic process;primary metabolic process	cellular anatomical entity;extracellular region		Glyco_hydro_3;Glyco_hydro_3_C		Glycosidase;Hydrolase;Referenceproteome;Secreted;Signal		GO:0000272;GO:0005975;GO:0005976;GO:0008152;GO:0009056;GO:0009057;GO:0009251;GO:0016052;GO:0043170;GO:0044042;GO:0044238;GO:0071704;GO:1901575	GO:0003824;GO:0004553;GO:0008422;GO:0015926;GO:0016787;GO:0016798;GO:0102483	GO:0005576;GO:0110165	GO:0005975;GO:0005976;GO:0008152;GO:0009056;GO:0009057;GO:0043170;GO:0044238	GO:0005576;GO:0110165	7	7	7	11.3	11.3	11.3	68.752	0	15.241	105420000	48	0	A0A0B4PJM3;I1LA42;A0A0R0L894;I1MW70;I1M7D8;K7LBF4;I1JHB3;A0A0R0FL35;I1LLE7;K7KB26;I1JIN6;A0A0R0L1T3;K7LQP0;I1N8A3;I1MB94;A0A0R0EWH1;I1JIN5;Q6V491	A0A0B4PJM3;I1LA42;A0A0R0L894	6	GLYMA_02G186800;GLYMA_10G106600	KRH33203;KRH72036	KRH33203;KRH72036
19.6256	19.5003	19.8792	19.3375	19.3051	19.3022	19.5207	19.7424	19.7447	18.0405	18.1883	19.5373				-1		ascorbate glutathione cycle;carbohydrate metabolic process;carboxylic acid metabolic process;catabolic process;cellular catabolic process;cellular metabolic process;cellular process;glutathione metabolic process;heterocycle metabolic process;hydrogen peroxide catabolic process;hydrogen peroxide metabolic process;L-ascorbic acid metabolic process;lactone metabolic process;macromolecule metabolic p…	antioxidant activity;catalytic activity;disulfide oxidoreductase activity;glutathione dehydrogenase (ascorbate) activity;glutathione disulfide oxidoreductase activity;glutathione transferase activity;oxidoreductase activity;oxidoreductase activity, acting on a sulfur group of donors;oxidoreductase activity, acting on a sulfur group of donors, quinone or similar compound as acceptor;transferase ac…		carbohydrate metabolic process;catabolic process;cellular process;heterocycle metabolic process;macromolecule metabolic process;macromolecule modification;metabolic process;nitrogen compound metabolic process;organic acid metabolic process;primary metabolic process;protein metabolic process;protein modification process;small molecule metabolic process;vitamin metabolic process			GST_N_3		Referenceproteome;Transferase		GO:0005975;GO:0005996;GO:0006082;GO:0006749;GO:0006766;GO:0006767;GO:0006807;GO:0008152;GO:0009056;GO:0009987;GO:0010731;GO:0019538;GO:0019752;GO:0019852;GO:0033355;GO:0036211;GO:0042743;GO:0042744;GO:0043170;GO:0043412;GO:0043436;GO:0044237;GO:0044238;GO:0044248;GO:0044281;GO:0046483;GO:0071704;GO:0072593;GO:1901334;GO:1901360;GO:1901564;GO:1901575	GO:0003824;GO:0004364;GO:0015036;GO:0015038;GO:0016209;GO:0016491;GO:0016667;GO:0016672;GO:0016740;GO:0016765;GO:0045174		GO:0005975;GO:0006082;GO:0006766;GO:0006807;GO:0008152;GO:0009056;GO:0009987;GO:0019538;GO:0036211;GO:0043170;GO:0043412;GO:0044238;GO:0044281;GO:0046483		9	2	2	42.9	13.9	13.9	28.863	0	7.2941	10926000	41	0	Q4JR86;A0A0B5E2H5;A0A0R0HKG9;C6TA68	Q4JR86;A0A0B5E2H5;A0A0R0HKG9	7	GLYMA_11G216400	KRH30940;KRH30941	KRH30940;KRH30941
18.3311	18.8631	19.1743	19.3837	18.6454	18.7752	19.4146	19.2255	19.2277	17.7094	18.1453	19.5084				-1		glutathione metabolic process;metabolic process;organic substance metabolic process;response to chemical;response to stimulus	catalytic activity;glutathione transferase activity;transferase activity;transferase activity, transferring alkyl or aryl (other than methyl) groups	cellular anatomical entity;cytoplasm	metabolic process;response to chemical;response to stimulus	cellular anatomical entity;cytoplasm		GST_C;GST_N		Referenceproteome;Transferase		GO:0006749;GO:0008152;GO:0042221;GO:0050896;GO:0071704	GO:0003824;GO:0004364;GO:0016740;GO:0016765	GO:0005737;GO:0110165	GO:0008152;GO:0042221;GO:0050896	GO:0005737;GO:0110165	4	4	2	26.7	26.7	17.1	24.755	0	15.63	11824000	54	0	C6SYD9;A0A0B5E2K6;I1KK63	C6SYD9;A0A0B5E2K6;I1KK63	8	GLYMA_07G140200	KRH49218	KRH49218
16.0518	19.7564	19.9523	19.9758	19.7435	20.3723	19.1261	15.5039	15.4246	16.408	15.7982	20.0661				-1		alpha-amino acid catabolic process;alpha-amino acid metabolic process;amino acid catabolic process;amino acid metabolic process;carboxylic acid catabolic process;carboxylic acid metabolic process;catabolic process;cellular catabolic process;cellular metabolic process;cellular process;glycine catabolic process;glycine decarboxylation via glycine cleavage system;glycine metabolic process;macromolec…		catalytic complex;cellular anatomical entity;cytoplasm;glycine cleavage complex;intracellular membrane-bounded organelle;intracellular organelle;membrane-bounded organelle;mitochondrion;organelle;oxidoreductase complex;protein-containing complex	amino acid metabolic process;catabolic process;cellular process;macromolecule metabolic process;macromolecule modification;metabolic process;nitrogen compound metabolic process;organic acid metabolic process;peptidyl-amino acid modification;primary metabolic process;protein maturation;protein metabolic process;protein modification process;small molecule metabolic process	catalytic complex;cellular anatomical entity;cytoplasm;glycine cleavage complex;intracellular membrane-bounded organelle;intracellular organelle;mitochondrion;organelle;oxidoreductase complex;protein-containing complex		GCV_H		Lipoyl;Mitochondrion;Referenceproteome;Transitpeptide		GO:0006082;GO:0006520;GO:0006544;GO:0006546;GO:0006807;GO:0008152;GO:0009056;GO:0009063;GO:0009069;GO:0009071;GO:0009249;GO:0009987;GO:0016054;GO:0018193;GO:0018205;GO:0019464;GO:0019538;GO:0019752;GO:0036211;GO:0043170;GO:0043412;GO:0043436;GO:0044237;GO:0044238;GO:0044248;GO:0044281;GO:0044282;GO:0046395;GO:0051604;GO:0071704;GO:1901564;GO:1901565;GO:1901575;GO:1901605;GO:1901606		GO:0005737;GO:0005739;GO:0005960;GO:0032991;GO:0043226;GO:0043227;GO:0043229;GO:0043231;GO:0110165;GO:1902494;GO:1990204	GO:0006082;GO:0006520;GO:0006807;GO:0008152;GO:0009056;GO:0009987;GO:0018193;GO:0019538;GO:0036211;GO:0043170;GO:0043412;GO:0044238;GO:0044281;GO:0051604	GO:0005737;GO:0005739;GO:0005960;GO:0032991;GO:0043226;GO:0043229;GO:0043231;GO:0110165;GO:1902494;GO:1990204	2	1	1	14.8	9	9	16.972	0	5.9919	5779000	9	5	A0A0R0E5J0	A0A0R0E5J0	11	GLYMA_20G019700	KRG89373	KRG89373
16.993	17.4576	16.8817	17.2134	16.6911	17.3624	17.213	16.9627	16.965	15.5616	16.1324	17.0469				-1			binding;catalytic activity;cation binding;copper ion binding;ion binding;L-ascorbate oxidase activity;metal ion binding;oxidoreductase activity;oxidoreductase activity, acting on diphenols and related substances as donors;oxidoreductase activity, acting on diphenols and related substances as donors, oxygen as acceptor;transition metal ion binding	cellular anatomical entity;extracellular region		cellular anatomical entity;extracellular region		Cu-oxidase;Cu-oxidase_2;Cu-oxidase_3		Glycoprotein;Metal-binding;Oxidoreductase;Referenceproteome;Repeat;Secreted;Signal			GO:0003824;GO:0005488;GO:0005507;GO:0008447;GO:0016491;GO:0016679;GO:0016682;GO:0043167;GO:0043169;GO:0046872;GO:0046914	GO:0005576;GO:0110165		GO:0005576;GO:0110165	6	1	1	16.3	3	3	60.158	0	75.968	1510200	23	0	A0A0R0E871;A0A0R0EIZ5	A0A0R0E871;A0A0R0EIZ5	14	GLYMA_20G051900	KRG89860;KRG89861	KRG89860;KRG89861
19.51	16.6682	17.3366	15.4007	17.1467	16.7091	18.0981	17.6619	17.663	19.1479	18.4999	16.2389				-1		anatomical structure formation involved in morphogenesis;aromatic compound catabolic process;catabolic process;cellular aromatic compound metabolic process;cellular catabolic process;cellular metabolic process;cellular nitrogen compound catabolic process;cellular nitrogen compound metabolic process;cellular process;developmental process;heterocycle catabolic process;heterocycle metabolic process;…	catalytic activity;oxidoreductase activity;oxidoreductase activity, acting on other nitrogenous compounds as donors;oxidoreductase activity, acting on other nitrogenous compounds as donors, oxygen as acceptor;urate oxidase activity	cellular anatomical entity;intracellular membrane-bounded organelle;intracellular organelle;membrane-bounded organelle;microbody;organelle;peroxisome	anatomical structure formation involved in morphogenesis;catabolic process;cellular aromatic compound metabolic process;cellular nitrogen compound metabolic process;cellular process;developmental process;heterocycle metabolic process;metabolic process;nitrogen compound metabolic process;nucleobase-containing compound metabolic process;nucleobase-containing small molecule metabolic process;primary…	cellular anatomical entity;intracellular membrane-bounded organelle;intracellular organelle;microbody;organelle;peroxisome		Uricase		Directproteinsequencing;Nodulation;Oxidoreductase;Peroxisome;Purinemetabolism;Referenceproteome		GO:0006139;GO:0006144;GO:0006145;GO:0006725;GO:0006807;GO:0008152;GO:0009056;GO:0009112;GO:0009877;GO:0009987;GO:0019439;GO:0019628;GO:0032502;GO:0034641;GO:0044237;GO:0044238;GO:0044248;GO:0044270;GO:0044281;GO:0044282;GO:0046113;GO:0046415;GO:0046483;GO:0046700;GO:0048646;GO:0055086;GO:0071704;GO:0072521;GO:0072523;GO:1901360;GO:1901361;GO:1901564;GO:1901565;GO:1901575	GO:0003824;GO:0004846;GO:0016491;GO:0016661;GO:0016663	GO:0005777;GO:0042579;GO:0043226;GO:0043227;GO:0043229;GO:0043231;GO:0110165	GO:0006139;GO:0006725;GO:0006807;GO:0008152;GO:0009056;GO:0009987;GO:0032502;GO:0034641;GO:0044238;GO:0044281;GO:0046483;GO:0048646;GO:0055086	GO:0005777;GO:0042579;GO:0043226;GO:0043229;GO:0043231;GO:0110165	4	4	4	19.8	19.8	19.8	28.008	0	12.229	3894700	5	3	C6T8P1;A0A0R0EHZ4;O04104;A0A0R0E8N5;P04670;A0A0R4J455;C6TNK1	C6T8P1;A0A0R0EHZ4;O04104;A0A0R0E8N5;P04670;A0A0R4J455;C6TNK1	16	GLYMA_20G072400;GLYMA_U032500	KRG88730;KRG90166;KRG90167	KRG88730;KRG90166;KRG90167
17.9078	18.2913	19.0646	19.2188	18.7446	18.412	19.1426	17.9875	18.0226	18.0562	17.3894	18.5549				-1			amino acid binding;anion binding;binding;carboxylic acid binding;ion binding;organic acid binding;small molecule binding							Referenceproteome;Repeat			GO:0005488;GO:0016597;GO:0031406;GO:0036094;GO:0043167;GO:0043168;GO:0043177				5	5	5	28.5	28.5	28.5	25.306	0	11.903	8902300	11	0	I1NFD0;I1NFC7;I1LF20;A0A0R0E9X9;I1NFC9;I1NFC6;I1LF19;I1LF17	I1NFD0;I1NFC7;I1LF20;A0A0R0E9X9;I1NFC9;I1NFC6;I1LF19;I1LF17	18	GLYMA_10G279300;GLYMA_20G110400	KRG90732;KRG90733;KRG90734;KRG90735;KRG90736;KRH36023;KRH36024;KRH36025	KRG90732;KRG90733;KRG90734;KRG90735;KRG90736;KRH36023;KRH36024;KRH36025
19.7813	15.4297	18.8558	16.497	15.249	19.4609	18.9299	19.5366	19.5388	20.2954	20.3163	20.152				-1		aromatic compound biosynthetic process;biosynthetic process;cellular aromatic compound metabolic process;cellular biosynthetic process;cellular metabolic process;cellular process;lignin biosynthetic process;lignin metabolic process;metabolic process;organic cyclic compound biosynthetic process;organic cyclic compound metabolic process;organic substance biosynthetic process;organic substance metab…	binding;catalytic activity;cation binding;cinnamyl-alcohol dehydrogenase activity;ion binding;metal ion binding;oxidoreductase activity;oxidoreductase activity, acting on CH-OH group of donors;oxidoreductase activity, acting on the CH-OH group of donors, NAD or NADP as acceptor;transition metal ion binding;zinc ion binding		biosynthetic process;cellular aromatic compound metabolic process;cellular process;metabolic process;secondary metabolic process			ADH_N;ADH_zinc_N		Metal-binding;Oxidoreductase;Referenceproteome;Zinc		GO:0006725;GO:0008152;GO:0009058;GO:0009698;GO:0009699;GO:0009808;GO:0009809;GO:0009987;GO:0019438;GO:0019748;GO:0044237;GO:0044249;GO:0044550;GO:0071704;GO:1901360;GO:1901362;GO:1901576	GO:0003824;GO:0005488;GO:0008270;GO:0016491;GO:0016614;GO:0016616;GO:0043167;GO:0043169;GO:0045551;GO:0046872;GO:0046914		GO:0006725;GO:0008152;GO:0009058;GO:0009987;GO:0019748		5	5	5	14.6	14.6	14.6	39.079	0	12.195	13463000	14	3	C6TLE3;A0A0R0EAL6;A0A0R4J4D2;C6TJK5	C6TLE3;A0A0R0EAL6;A0A0R4J4D2	19	GLYMA_10G262400;GLYMA_20G128600	KRG91021;KRH35742	KRG91021;KRH35742
19.5514	18.269	18.5541	18.9472	15.6832	18.6738	16.0371	19.218	19.2202	19.4488	19.3643	18.937				-1		macromolecule metabolic process;metabolic process;nitrogen compound metabolic process;organic substance metabolic process;organonitrogen compound metabolic process;primary metabolic process;protein metabolic process;protein quality control for misfolded or incompletely synthesized proteins;proteolysis;proteolysis involved in protein catabolic process	ATP-dependent activity;ATP-dependent peptidase activity;ATPase binding;binding;catalytic activity;catalytic activity, acting on a protein;endopeptidase activity;enzyme binding;hydrolase activity;peptidase activity;protein binding;serine hydrolase activity;serine-type endopeptidase activity;serine-type peptidase activity	catalytic complex;cellular anatomical entity;endopeptidase Clp complex;plastid stroma;protein-containing complex	macromolecule metabolic process;metabolic process;nitrogen compound metabolic process;primary metabolic process;protein metabolic process;proteolysis;proteolysis involved in protein catabolic process	catalytic complex;cellular anatomical entity;endopeptidase Clp complex;protein-containing complex		CLP_protease		Referenceproteome		GO:0006508;GO:0006515;GO:0006807;GO:0008152;GO:0019538;GO:0043170;GO:0044238;GO:0051603;GO:0071704;GO:1901564	GO:0003824;GO:0004175;GO:0004176;GO:0004252;GO:0005488;GO:0005515;GO:0008233;GO:0008236;GO:0016787;GO:0017171;GO:0019899;GO:0051117;GO:0140096;GO:0140657	GO:0009368;GO:0009532;GO:0032991;GO:0110165;GO:1902494	GO:0006508;GO:0006807;GO:0008152;GO:0019538;GO:0043170;GO:0044238;GO:0051603	GO:0009368;GO:0032991;GO:0110165;GO:1902494	2	2	2	6.9	6.9	6.9	40.419	0	16.031	8539200	7	2	C6TDX0;A0A0R0HZ75;A0A0R0EAT4	C6TDX0;A0A0R0HZ75;A0A0R0EAT4	20	GLYMA_10G257800;GLYMA_20G133300	KRG91103;KRH35674	KRG91103;KRH35674
20.7223	22.309	22.5679	23.212	22.8552	22.5077	23.0595	20.6042	20.5522	22.2719	21.3409	21.7902				-1			binding;carbohydrate binding					Lectin_legB		Lectin;Referenceproteome			GO:0005488;GO:0030246				7	7	7	48.9	48.9	48.9	25.423	0	68.36	182710000	225	0	A0A0R0EBT5;C6SW99	A0A0R0EBT5;C6SW99	21	GLYMA_20G158700	KRG91519	KRG91519
20.6135	18.7924	19.5566	18.9894	19.1044	19.5376	18.1236	20.4953	20.4976	20.9275	20.631	20.5511				-1		biosynthetic process;carbohydrate biosynthetic process;carbohydrate derivative metabolic process;carbohydrate metabolic process;cellular metabolic process;cellular process;disaccharide biosynthetic process;disaccharide metabolic process;fructose 1,6-bisphosphate metabolic process;fructose 6-phosphate metabolic process;fructose metabolic process;gluconeogenesis;glucose metabolic process;hexose bio…	binding;carbohydrate phosphatase activity;catalytic activity;cation binding;fructose 1,6-bisphosphate 1-phosphatase activity;hydrolase activity;hydrolase activity, acting on ester bonds;ion binding;metal ion binding;phosphatase activity;phosphoric ester hydrolase activity;sugar-phosphatase activity	cellular anatomical entity;cytoplasm;cytosol	biosynthetic process;carbohydrate derivative metabolic process;carbohydrate metabolic process;cellular process;metabolic process;oligosaccharide metabolic process;phosphorus metabolic process;primary metabolic process;small molecule metabolic process	cellular anatomical entity;cytoplasm;cytosol		FBPase;FBPase_C		Carbohydratemetabolism;Hydrolase;Magnesium;Metal-binding;Referenceproteome		GO:0005975;GO:0005984;GO:0005985;GO:0005986;GO:0005996;GO:0006000;GO:0006002;GO:0006006;GO:0006094;GO:0006793;GO:0006796;GO:0008152;GO:0009058;GO:0009311;GO:0009312;GO:0009987;GO:0016051;GO:0019318;GO:0019319;GO:0019637;GO:0030388;GO:0044237;GO:0044238;GO:0044281;GO:0044283;GO:0046351;GO:0046364;GO:0071704;GO:1901135;GO:1901576	GO:0003824;GO:0005488;GO:0016787;GO:0016788;GO:0016791;GO:0019203;GO:0042132;GO:0042578;GO:0043167;GO:0043169;GO:0046872;GO:0050308	GO:0005737;GO:0005829;GO:0110165	GO:0005975;GO:0006793;GO:0008152;GO:0009058;GO:0009311;GO:0009987;GO:0044238;GO:0044281;GO:1901135	GO:0005737;GO:0005829;GO:0110165	10	10	4	33.3	33.3	13.6	37.131	0	119.02	49977000	64	0	A0A0R0EC38;I1LDG8;C6TM26;I1NH19;I1NH18;C6TEQ3;C6TD49;I1LDG9;A0A0R0EC46;K7LKW8;C6T8Y3	A0A0R0EC38;I1LDG8;C6TM26;I1NH19;I1NH18;C6TEQ3;C6TD49;I1LDG9;A0A0R0EC46;K7LKW8	22	GLYMA_10G225400;GLYMA_20G166400	KRG91644;KRG91645;KRG91646;KRG91647;KRH35151;KRH35152;KRH35153	KRG91644;KRG91645;KRG91646;KRG91647;KRH35151;KRH35152;KRH35153
20.2452	21.0789	17.3059	21.2007	21.2331	21.4885	20.6518	20.2795	20.2817	19.9321	20.1046	20.4014				-1			binding;catalytic activity;cation binding;heme binding;ion binding;iron ion binding;metal ion binding;monooxygenase activity;nucleic acid binding;organic cyclic compound binding;oxidoreductase activity;oxidoreductase activity, acting on paired donors, with incorporation or reduction of molecular oxygen;tetrapyrrole binding;transition metal ion binding					CSD;p450		Referenceproteome			GO:0003676;GO:0003824;GO:0004497;GO:0005488;GO:0005506;GO:0016491;GO:0016705;GO:0020037;GO:0043167;GO:0043169;GO:0046872;GO:0046906;GO:0046914;GO:0097159				1	1	1	3.6	3.6	3.6	36.948	0	5.2627	18446000	13	1	A0A0R0EDH9	A0A0R0EDH9	23	GLYMA_20G008200	KRG89202	KRG89202
15.9759	18.544	18.992	16.3777	18.4643	15.5863	17.7937	19.5397	19.5419	19.7399	18.6046	18.7979				-1		carbohydrate metabolic process;glucose metabolic process;hexose metabolic process;metabolic process;monosaccharide metabolic process;organic substance metabolic process;primary metabolic process;small molecule metabolic process	catalytic activity;intramolecular phosphotransferase activity;intramolecular transferase activity;isomerase activity;phosphomannomutase activity		carbohydrate metabolic process;metabolic process;primary metabolic process;small molecule metabolic process			PGM_PMM_I;PGM_PMM_II;PGM_PMM_III		Carbohydratemetabolism;Glucosemetabolism;Referenceproteome		GO:0005975;GO:0005996;GO:0006006;GO:0008152;GO:0019318;GO:0044238;GO:0044281;GO:0071704	GO:0003824;GO:0004615;GO:0016853;GO:0016866;GO:0016868		GO:0005975;GO:0008152;GO:0044238;GO:0044281		4	4	4	13.1	13.1	13.1	58.147	0	8.9524	7517100	13	3	I1NHG0;I1LD09;A0A0R0EDW0;A0A0R0HWQ2;K7N476;I1LD08;A0A0R0ELF0	I1NHG0;I1LD09;A0A0R0EDW0;A0A0R0HWQ2;K7N476;I1LD08;A0A0R0ELF0	24	GLYMA_10G210700;GLYMA_20G179900	KRG91903;KRG91904;KRG91905;KRG91906;KRH34868;KRH34869;KRH34870	KRG91903;KRG91904;KRG91905;KRG91906;KRH34868;KRH34869;KRH34870
16.3396	16.8119	17.0113	17.0243	16.3867	16.5593	16.4832	16.1111	16.2865	16.5653	16.6614	16.4461				-1		catabolic process;macromolecule catabolic process;macromolecule metabolic process;macromolecule modification;metabolic process;modification-dependent macromolecule catabolic process;modification-dependent protein catabolic process;nitrogen compound metabolic process;organic substance catabolic process;organic substance metabolic process;organonitrogen compound metabolic process;post-translational…	catalytic activity;catalytic activity, acting on a protein;cysteine-type deubiquitinase activity;cysteine-type peptidase activity;deubiquitinase activity;hydrolase activity;peptidase activity;ubiquitin-like protein peptidase activity	cellular anatomical entity;cytoplasm	catabolic process;macromolecule catabolic process;macromolecule metabolic process;macromolecule modification;metabolic process;nitrogen compound metabolic process;primary metabolic process;protein metabolic process;protein modification by small protein conjugation or removal;protein modification process;proteolysis;proteolysis involved in protein catabolic process	cellular anatomical entity;cytoplasm		Peptidase_C12;UCH_C		Coiledcoil;Hydrolase;Protease;Referenceproteome;Thiolprotease;Ublconjugationpathway		GO:0006508;GO:0006511;GO:0006807;GO:0008152;GO:0009056;GO:0009057;GO:0016579;GO:0019538;GO:0019941;GO:0036211;GO:0043170;GO:0043412;GO:0043632;GO:0043687;GO:0044238;GO:0051603;GO:0070646;GO:0070647;GO:0071704;GO:1901564;GO:1901575	GO:0003824;GO:0004843;GO:0008233;GO:0008234;GO:0016787;GO:0019783;GO:0101005;GO:0140096	GO:0005737;GO:0110165	GO:0006508;GO:0006807;GO:0008152;GO:0009056;GO:0009057;GO:0019538;GO:0036211;GO:0043170;GO:0043412;GO:0044238;GO:0051603;GO:0070647	GO:0005737;GO:0110165	1	1	1	11.1	11.1	11.1	28.025	0	9.401	911160	12	3	A0A0R0EEL8;I1LBV5;I1NIJ5;I1LBV4	A0A0R0EEL8;I1LBV5;I1NIJ5;I1LBV4	26	GLYMA_10G170500;GLYMA_20G219500	KRG92573;KRG92574;KRG92575;KRH34212;KRH34213;KRH34214;KRH34215	KRG92573;KRG92574;KRG92575;KRH34212;KRH34213;KRH34214;KRH34215
20.2078	20.6607	20.697	21.2099	20.8567	20.5754	20.9947	19.9102	19.9124	20.4171	20.9115	20.502				-1		biosynthetic process;flavonoid biosynthetic process;flavonoid metabolic process;metabolic process;organic substance biosynthetic process;organic substance metabolic process	catalytic activity;chalcone isomerase activity;intramolecular lyase activity;isomerase activity		biosynthetic process;metabolic process			Chalcone		Flavonoidbiosynthesis;Isomerase;Referenceproteome		GO:0008152;GO:0009058;GO:0009812;GO:0009813;GO:0071704;GO:1901576	GO:0003824;GO:0016853;GO:0016872;GO:0045430		GO:0008152;GO:0009058		9	9	2	51.8	51.8	16.1	23.265	0	43.678	54480000	97	0	Q93XE6;C6SVP9;A0A0R0EFP3;A6XKY2;A0A1A9C7M4;I1NJ68;O81980;A0A1A9C9D4;A0A1A9C8J0	Q93XE6;C6SVP9;A0A0R0EFP3;A6XKY2;A0A1A9C7M4;I1NJ68;O81980;A0A1A9C9D4	27	GLYMA_20G241500	KRG92975;KRG92976	KRG92975;KRG92976
19.3582	19.1956	18.988	18.8179	18.7729	18.6677	16.9244	18.6652	18.6675	18.5019	17.5331	19.4154				-1								PAP_fibrillin		Referenceproteome							2	2	2	8.2	8.2	8.2	31.607	0	21.637	7094800	14	1	K7LM56;K7LM55;A0A0R0EFS5;C6TL60;A0A0R0EFS3;K7LM60;A0A0R0I7K7;K7LM59;C6TDD8;K7LM58;K7LM57	K7LM56;K7LM55;A0A0R0EFS5;C6TL60;A0A0R0EFS3;K7LM60;A0A0R0I7K7;K7LM59;C6TDD8;K7LM58;K7LM57	28	GLYMA_10G294800;GLYMA_20G244500	KRG93036;KRG93037;KRH36287;KRH36288;KRH36289;KRH36290;KRH36291;KRH36292;KRH36293;KRH36294	KRG93036;KRG93037;KRH36287;KRH36288;KRH36289;KRH36290;KRH36291;KRH36292;KRH36293;KRH36294
17.1619	14.8923	17.6945	16.5919	17.8106	16.377	17.9904	18.7817	18.7839	17.8625	15.4902	17.7041				-1								DUF1995		Referenceproteome							1	1	1	4.5	4.5	4.5	23.127	0.0075047	1.6699	2413200	2	5	C6TAF6;K7N583;I1NIZ3;I1LBC4;A0A0R0EGF8;A0A0R0ENY2;A0A0R0ERE8;A0A0R0ERM2	C6TAF6;K7N583;I1NIZ3;I1LBC4;A0A0R0EGF8;A0A0R0ENY2;A0A0R0ERE8;A0A0R0ERM2	29	GLYMA_10G154300;GLYMA_20G234000	KRG92850;KRG92851;KRG92852;KRG92853;KRG92854;KRG92855;KRG92856;KRH33945	KRG92850;KRG92851;KRG92852;KRG92853;KRG92854;KRG92855;KRG92856;KRH33945
14.8371	14.8427	15.6391	16.0522	15.4453	16.0351	15.8437	15.8018	15.8041	14.3086	15.0728	14.9627				-1			catalytic activity;glucosyltransferase activity;glycosyltransferase activity;hexosyltransferase activity;transferase activity;UDP-glucosyltransferase activity;UDP-glycosyltransferase activity	cellular anatomical entity;cytoplasm		cellular anatomical entity;cytoplasm		UDPGT		Glycosyltransferase;Referenceproteome;Transferase			GO:0003824;GO:0008194;GO:0016740;GO:0016757;GO:0016758;GO:0035251;GO:0046527	GO:0005737;GO:0110165		GO:0005737;GO:0110165	2	2	2	14.3	14.3	14.3	19.586	0	5.4073	706620	37	1	C6TJJ9;A0A0R0EIR6	C6TJJ9;A0A0R0EIR6	31	GLYMA_20G057500	KRG89946	KRG89946
19.3783	15.65	19.1277	19.111	15.7253	18.6481	19.1312	19.115	19.1172	16.3324	19.241	19.0027				-1		biosynthetic process;metabolic process	catalytic activity;nucleotidyltransferase activity;transferase activity;transferase activity, transferring phosphorus-containing groups	cellular anatomical entity;cytoplasm	biosynthetic process;metabolic process	cellular anatomical entity;cytoplasm		NTP_transferase		Referenceproteome		GO:0008152;GO:0009058	GO:0003824;GO:0016740;GO:0016772;GO:0016779	GO:0005737;GO:0110165	GO:0008152;GO:0009058	GO:0005737;GO:0110165	1	1	1	3	3	3	45.082	0	4.8932	5556700	3	3	A0A0R0EJ71;I1N6T7;K7KVU9;I1JX24	A0A0R0EJ71;I1N6T7;K7KVU9;I1JX24	32	GLYMA_04G178400;GLYMA_06G186400;GLYMA_19G050100	KRG93925;KRG93926;KRH54456;KRH63463;KRH63464	KRG93925;KRG93926;KRH54456;KRH63463;KRH63464
22.1205	22.2164	21.941	22.2348	22.6509	22.3512	21.8839	21.5219	21.5326	22.3592	21.5908	21.4295				-1		catabolic process;cellular process;cellular response to stimulus;cellular response to stress;ERAD pathway;macromolecule catabolic process;macromolecule metabolic process;metabolic process;modification-dependent macromolecule catabolic process;modification-dependent protein catabolic process;nitrogen compound metabolic process;organic substance catabolic process;organic substance metabolic process…	binding;calcium ion binding;carbohydrate binding;cation binding;ion binding;metal ion binding;protein binding;unfolded protein binding	cellular anatomical entity;endoplasmic reticulum lumen;endoplasmic reticulum membrane;intracellular organelle lumen;membrane;membrane-enclosed lumen;organelle lumen;organelle membrane	catabolic process;cellular process;macromolecule catabolic process;macromolecule metabolic process;metabolic process;nitrogen compound metabolic process;primary metabolic process;protein catabolic process;protein folding;protein metabolic process;proteolysis;proteolysis involved in protein catabolic process;response to chemical;response to stimulus;response to stress	cellular anatomical entity;membrane;organelle lumen		Calreticulin		Chaperone;Disulfidebond;Endoplasmicreticulum;Lectin;Referenceproteome;Repeat;Signal		GO:0006457;GO:0006508;GO:0006511;GO:0006807;GO:0006950;GO:0008152;GO:0009056;GO:0009057;GO:0009987;GO:0010033;GO:0010243;GO:0010498;GO:0019538;GO:0019941;GO:0030163;GO:0030433;GO:0033554;GO:0034976;GO:0036503;GO:0042221;GO:0043161;GO:0043170;GO:0043632;GO:0044238;GO:0050896;GO:0051603;GO:0051716;GO:0071704;GO:1901564;GO:1901565;GO:1901575;GO:1901698	GO:0005488;GO:0005509;GO:0005515;GO:0030246;GO:0043167;GO:0043169;GO:0046872;GO:0051082	GO:0005788;GO:0005789;GO:0016020;GO:0031090;GO:0031974;GO:0043233;GO:0070013;GO:0110165	GO:0006457;GO:0006508;GO:0006807;GO:0006950;GO:0008152;GO:0009056;GO:0009057;GO:0009987;GO:0019538;GO:0030163;GO:0042221;GO:0043170;GO:0044238;GO:0050896;GO:0051603	GO:0016020;GO:0043233;GO:0110165	15	15	2	38.9	38.9	5.2	48.502	0	166.66	187410000	182	0	A0A0R0EJA3;I1NF03	A0A0R0EJA3;I1NF03	33	GLYMA_20G098400	KRG90550;KRG90551	KRG90550;KRG90551
20.3402	20.7861	20.88	20.6913	20.7352	20.5909	20.8396	19.3699	19.2904	20.7804	20.3397	19.9496				-1		aromatic compound catabolic process;benzene-containing compound metabolic process;carboxylic acid catabolic process;carboxylic acid metabolic process;catabolic process;cellular aromatic compound metabolic process;cellular catabolic process;cellular lipid catabolic process;cellular lipid metabolic process;cellular metabolic process;cellular process;fatty acid beta-oxidation;fatty acid catabolic pr…	acetyl-CoA C-acyltransferase activity;acyltransferase activity;acyltransferase activity, transferring groups other than amino-acyl groups;C-acyltransferase activity;catalytic activity;transferase activity	cellular anatomical entity;intracellular membrane-bounded organelle;intracellular organelle;membrane-bounded organelle;microbody;organelle;peroxisome	catabolic process;cellular aromatic compound metabolic process;cellular lipid metabolic process;cellular process;lipid metabolic process;metabolic process;monocarboxylic acid metabolic process;organic acid metabolic process;primary metabolic process;small molecule metabolic process;xenobiotic metabolic process	cellular anatomical entity;intracellular membrane-bounded organelle;intracellular organelle;microbody;organelle;peroxisome		Thiolase_C;Thiolase_N		Acyltransferase;Peroxisome;Referenceproteome;Transferase		GO:0006082;GO:0006629;GO:0006631;GO:0006635;GO:0006725;GO:0006805;GO:0008152;GO:0009056;GO:0009062;GO:0009987;GO:0010124;GO:0016042;GO:0016054;GO:0019395;GO:0019439;GO:0019752;GO:0030258;GO:0032787;GO:0034440;GO:0042178;GO:0042537;GO:0043436;GO:0044237;GO:0044238;GO:0044242;GO:0044248;GO:0044255;GO:0044281;GO:0044282;GO:0046395;GO:0071704;GO:0072329;GO:1901360;GO:1901361;GO:1901575	GO:0003824;GO:0003988;GO:0016408;GO:0016740;GO:0016746;GO:0016747	GO:0005777;GO:0042579;GO:0043226;GO:0043227;GO:0043229;GO:0043231;GO:0110165	GO:0006082;GO:0006629;GO:0006725;GO:0006805;GO:0008152;GO:0009056;GO:0009987;GO:0032787;GO:0044238;GO:0044255;GO:0044281	GO:0005777;GO:0042579;GO:0043226;GO:0043229;GO:0043231;GO:0110165	7	7	7	23.9	23.9	23.9	43.296	0	32.202	33072000	49	0	A0A0R0EJP3;I1LAJ1;I1NEH3;B0M1A9;C6TI67;I1NEH4;I1LAJ0	A0A0R0EJP3;I1LAJ1;I1NEH3;B0M1A9;C6TI67;I1NEH4;I1LAJ0	34	GLYMA_10G124700;GLYMA_20G077000	KRG90241;KRG90242;KRG90243;KRH33469;KRH33470;KRH33471	KRG90241;KRG90242;KRG90243;KRH33469;KRH33470;KRH33471
14.02	14.5587	14.7606	14.4074	14.7008	15.1181	14.7057	15.1648	15.1671	15.7014	13.3879	14.7414				-1		carbohydrate metabolic process;hexose metabolic process;mannose metabolic process;metabolic process;monosaccharide metabolic process;organic substance metabolic process;primary metabolic process;small molecule metabolic process	alpha-mannosidase activity;binding;carbohydrate binding;catalytic activity;cation binding;hydrolase activity;hydrolase activity, acting on glycosyl bonds;hydrolase activity, hydrolyzing O-glycosyl compounds;ion binding;mannosidase activity;metal ion binding		carbohydrate metabolic process;metabolic process;primary metabolic process;small molecule metabolic process			Alpha-mann_mid;Glyco_hydro_38C;Glyco_hydro_38N;Glyco_hydro38C2		Glycosidase;Hydrolase;Metal-binding;Referenceproteome;Signal;Zinc		GO:0005975;GO:0005996;GO:0006013;GO:0008152;GO:0019318;GO:0044238;GO:0044281;GO:0071704	GO:0003824;GO:0004553;GO:0004559;GO:0005488;GO:0015923;GO:0016787;GO:0016798;GO:0030246;GO:0043167;GO:0043169;GO:0046872		GO:0005975;GO:0008152;GO:0044238;GO:0044281		3	1	1	5.1	2.2	2.2	97.448	0	5.4362	305610	12	1	I1N815;A0A0R0EK76;I1N814	I1N815;A0A0R0EK76;I1N814	36	GLYMA_19G103200	KRG94703;KRG94704;KRG94707	KRG94703;KRG94704;KRG94707
19.6778	19.879	20.5173	20.1117	20.2192	19.9001	19.7786	20.436	20.4383	19.8315	20.6638	20.5973				-1		cellular metabolic process;cellular process;metabolic process;photosynthesis	binding;calcium ion binding;cation binding;ion binding;metal ion binding	catalytic complex;cellular anatomical entity;extrinsic component of membrane;membrane protein complex;oxidoreductase complex;photosystem II oxygen evolving complex;protein-containing complex	cellular process;metabolic process;photosynthesis	catalytic complex;cellular anatomical entity;extrinsic component of membrane;membrane protein complex;oxidoreductase complex;protein-containing complex		PsbP		Referenceproteome		GO:0008152;GO:0009987;GO:0015979;GO:0044237	GO:0005488;GO:0005509;GO:0043167;GO:0043169;GO:0046872	GO:0009654;GO:0019898;GO:0032991;GO:0098796;GO:0110165;GO:1902494;GO:1990204	GO:0008152;GO:0009987;GO:0015979	GO:0019898;GO:0032991;GO:0098796;GO:0110165;GO:1902494;GO:1990204	4	4	1	17.1	17.1	4.9	33.2	0	11.686	31585000	35	0	A0A0R0EKI7;C6TME6;I1NJ53	A0A0R0EKI7;C6TME6;I1NJ53	37	GLYMA_20G098500;GLYMA_20G239700	KRG90552;KRG92956	KRG90552;KRG92956
15.5471	20.0085	20.2784	19.1584	20.772	18.9594	19.0548	18.1925	18.194	17.9588	18.9846	18.7557				-1		amide biosynthetic process;amide metabolic process;amino acid activation;amino acid metabolic process;biological regulation;biosynthetic process;carboxylic acid metabolic process;cellular aromatic compound metabolic process;cellular biosynthetic process;cellular metabolic process;cellular nitrogen compound biosynthetic process;cellular nitrogen compound metabolic process;cellular process;glutamin…	adenyl nucleotide binding;adenyl ribonucleotide binding;anion binding;ATP binding;binding;carbohydrate derivative binding;carbon-nitrogen ligase activity, with glutamine as amido-N-donor;catalytic activity;catalytic activity, acting on a nucleic acid;catalytic activity, acting on a tRNA;catalytic activity, acting on RNA;glutaminyl-tRNA synthase (glutamine-hydrolyzing) activity;heterocyclic compou…	catalytic complex;cellular anatomical entity;chloroplast;glutamyl-tRNA(Gln) amidotransferase complex;intracellular membrane-bounded organelle;intracellular organelle;intracellular protein-containing complex;membrane-bounded organelle;mitochondrion;organelle;plastid;protein-containing complex	amide metabolic process;amino acid metabolic process;biological regulation;biosynthetic process;cellular aromatic compound metabolic process;cellular nitrogen compound metabolic process;cellular process;heterocycle metabolic process;macromolecule biosynthetic process;macromolecule metabolic process;metabolic process;mitochondrial translation;nitrogen compound metabolic process;nucleobase-containi…	catalytic complex;cellular anatomical entity;chloroplast;intracellular membrane-bounded organelle;intracellular organelle;mitochondrion;organelle;plastid;protein-containing complex		Glu-tRNAGln		ATP-binding;Chloroplast;Ligase;Mitochondrion;Nucleotide-binding;Plastid;Proteinbiosynthesis;Referenceproteome		GO:0006082;GO:0006139;GO:0006399;GO:0006412;GO:0006450;GO:0006518;GO:0006520;GO:0006725;GO:0006807;GO:0008152;GO:0009058;GO:0009059;GO:0009987;GO:0016070;GO:0019538;GO:0019752;GO:0032543;GO:0034641;GO:0034660;GO:0043038;GO:0043039;GO:0043043;GO:0043170;GO:0043436;GO:0043603;GO:0043604;GO:0044237;GO:0044238;GO:0044249;GO:0044271;GO:0044281;GO:0046483;GO:0065007;GO:0065008;GO:0070681;GO:0071704;GO:…	GO:0000166;GO:0003824;GO:0005488;GO:0005524;GO:0016874;GO:0016879;GO:0016884;GO:0017076;GO:0030554;GO:0032553;GO:0032555;GO:0032559;GO:0035639;GO:0036094;GO:0043167;GO:0043168;GO:0050567;GO:0097159;GO:0097367;GO:0140098;GO:0140101;GO:0140640;GO:1901265;GO:1901363	GO:0005739;GO:0009507;GO:0009536;GO:0030956;GO:0032991;GO:0043226;GO:0043227;GO:0043229;GO:0043231;GO:0110165;GO:0140535;GO:1902494	GO:0006082;GO:0006139;GO:0006399;GO:0006412;GO:0006518;GO:0006520;GO:0006725;GO:0006807;GO:0008152;GO:0009058;GO:0009059;GO:0009987;GO:0016070;GO:0019538;GO:0032543;GO:0034641;GO:0043170;GO:0043603;GO:0044238;GO:0044281;GO:0046483;GO:0065007;GO:0065008	GO:0005739;GO:0009507;GO:0009536;GO:0032991;GO:0043226;GO:0043229;GO:0043231;GO:0110165;GO:1902494	3	3	3	28.7	28.7	28.7	16.035	0	32.67	9590400	11	1	K7LKQ2;A0A0R0EL96;A0A0R0I3U6;A0A0R0EPN6;A0A0R0EP28;A0A0R0HWX5	K7LKQ2;A0A0R0EL96;A0A0R0I3U6	38	GLYMA_10G214200;GLYMA_20G177400	KRG91842;KRH34934;KRH34935;KRH34936;KRH34937	KRG91842;KRH34934;KRH34935;KRH34936;KRH34937
18.6586	18.9785	19.0126	18.8121	18.6793	18.5652	19.0048	16.2811	16.1869	17.733	16.2196	18.9723				-1			catalytic activity;hydrolase activity;hydrolase activity, acting on ester bonds					Lipase_GDSL		Referenceproteome;Signal			GO:0003824;GO:0016787;GO:0016788				1	1	1	3.1	3.1	3.1	43.724	0.0038941	1.9274	3421200	7	3	A0A0R0ELP2	A0A0R0ELP2	39	GLYMA_19G120000	KRG94944	KRG94944
19.5909	19.5648	19.4858	19.6444	19.2458	19.7439	19.7963	19.4342	19.4486	19.6245	19.7411	18.9127				-1		'de novo' AMP biosynthetic process;AMP biosynthetic process;AMP metabolic process;aromatic compound biosynthetic process;biosynthetic process;carbohydrate derivative biosynthetic process;carbohydrate derivative metabolic process;cellular aromatic compound metabolic process;cellular biosynthetic process;cellular metabolic process;cellular nitrogen compound biosynthetic process;cellular nitrogen co…	adenylosuccinate synthase activity;anion binding;binding;carbohydrate derivative binding;catalytic activity;cation binding;GTP binding;guanyl nucleotide binding;guanyl ribonucleotide binding;heterocyclic compound binding;ion binding;ligase activity;ligase activity, forming carbon-nitrogen bonds;magnesium ion binding;metal ion binding;nucleoside phosphate binding;nucleotide binding;organic cyclic …	cellular anatomical entity;chloroplast;cytoplasm;intracellular membrane-bounded organelle;intracellular organelle;membrane-bounded organelle;organelle;plastid	biosynthetic process;carbohydrate derivative metabolic process;cellular aromatic compound metabolic process;cellular nitrogen compound metabolic process;cellular process;heterocycle metabolic process;metabolic process;nitrogen compound metabolic process;nucleobase-containing compound metabolic process;nucleobase-containing small molecule metabolic process;nucleotide metabolic process;phosphorus m…	cellular anatomical entity;chloroplast;cytoplasm;intracellular membrane-bounded organelle;intracellular organelle;organelle;plastid		Adenylsucc_synt		Chloroplast;GTP-binding;Ligase;Magnesium;Metal-binding;Nucleotide-binding;Plastid;Purinebiosynthesis;Referenceproteome		GO:0006139;GO:0006163;GO:0006164;GO:0006167;GO:0006725;GO:0006753;GO:0006793;GO:0006796;GO:0006807;GO:0008152;GO:0009058;GO:0009117;GO:0009123;GO:0009124;GO:0009126;GO:0009127;GO:0009150;GO:0009152;GO:0009156;GO:0009161;GO:0009165;GO:0009167;GO:0009168;GO:0009259;GO:0009260;GO:0009987;GO:0018130;GO:0019438;GO:0019637;GO:0019693;GO:0034641;GO:0034654;GO:0044208;GO:0044237;GO:0044238;GO:0044249;GO:…	GO:0000166;GO:0000287;GO:0003824;GO:0004019;GO:0005488;GO:0005525;GO:0016874;GO:0016879;GO:0017076;GO:0019001;GO:0032553;GO:0032555;GO:0032561;GO:0035639;GO:0036094;GO:0043167;GO:0043168;GO:0043169;GO:0046872;GO:0097159;GO:0097367;GO:1901265;GO:1901363	GO:0005737;GO:0009507;GO:0009536;GO:0043226;GO:0043227;GO:0043229;GO:0043231;GO:0110165	GO:0006139;GO:0006725;GO:0006793;GO:0006807;GO:0008152;GO:0009058;GO:0009117;GO:0009987;GO:0034641;GO:0044238;GO:0044281;GO:0046483;GO:0055086;GO:1901135	GO:0005737;GO:0009507;GO:0009536;GO:0043226;GO:0043229;GO:0043231;GO:0110165	6	6	6	19.6	19.6	19.6	50.92	0	24.426	17437000	59	0	A0A0R0EM38;I1N933;I1JNF2	A0A0R0EM38;I1N933;I1JNF2	40	GLYMA_03G139200;GLYMA_19G142400	KRG95304;KRG95305;KRH66980	KRG95304;KRG95305;KRH66980
15.8618	14.4606	14.9841	14.8891	14.5952	13.9989	16.4743	14.9324	14.9342	15.4987	15.2433	16.0643				-1		'de novo' L-methionine biosynthetic process;alpha-amino acid biosynthetic process;alpha-amino acid metabolic process;amino acid biosynthetic process;amino acid metabolic process;aspartate family amino acid biosynthetic process;aspartate family amino acid metabolic process;biosynthetic process;carboxylic acid biosynthetic process;carboxylic acid metabolic process;cellular biosynthetic process;cell…	anion binding;binding;carbon-sulfur lyase activity;catalytic activity;cystathionine beta-lyase activity;heterocyclic compound binding;ion binding;lyase activity;organic cyclic compound binding;pyridoxal phosphate binding;small molecule binding;vitamin B6 binding;vitamin binding	cellular anatomical entity;cytoplasm	amino acid metabolic process;biosynthetic process;cellular process;metabolic process;nitrogen compound metabolic process;organic acid metabolic process;primary metabolic process;small molecule metabolic process;sulfur compound metabolic process	cellular anatomical entity;cytoplasm		Cys_Met_Meta_PP		Pyridoxalphosphate;Referenceproteome		GO:0000096;GO:0000097;GO:0006082;GO:0006520;GO:0006534;GO:0006555;GO:0006790;GO:0006807;GO:0008152;GO:0008652;GO:0009058;GO:0009066;GO:0009067;GO:0009069;GO:0009086;GO:0009092;GO:0009987;GO:0016053;GO:0019346;GO:0019752;GO:0043436;GO:0044237;GO:0044238;GO:0044249;GO:0044272;GO:0044281;GO:0044283;GO:0046394;GO:0050667;GO:0071265;GO:0071266;GO:0071704;GO:1901564;GO:1901566;GO:1901576;GO:1901605;GO:…	GO:0003824;GO:0004121;GO:0005488;GO:0016829;GO:0016846;GO:0019842;GO:0030170;GO:0036094;GO:0043167;GO:0043168;GO:0070279;GO:0097159;GO:1901363	GO:0005737;GO:0110165	GO:0006082;GO:0006520;GO:0006790;GO:0006807;GO:0008152;GO:0009058;GO:0009987;GO:0044238;GO:0044281	GO:0005737;GO:0110165	1	1	1	4.3	4.3	4.3	50.519	0.0071375	1.6888	406370	6	2	A0A0R0EMR0	A0A0R0EMR0	41	GLYMA_19G132000	KRG95125	KRG95125
19.1273	19.202	20.6599	18.8981	18.8759	19.3787	18.7842	18.2119	18.2134	19.5653	17.9754	20.19				-1		cellular localization;cellular macromolecule localization;cellular process;establishment of localization;establishment of protein localization;localization;macromolecule localization;nitrogen compound transport;organic substance transport;protein localization;protein transport;transport	anion binding;binding;carbohydrate derivative binding;catalytic activity;GTP binding;GTPase activity;guanyl nucleotide binding;guanyl ribonucleotide binding;heterocyclic compound binding;hydrolase activity;hydrolase activity, acting on acid anhydrides;hydrolase activity, acting on acid anhydrides, in phosphorus-containing anhydrides;ion binding;nucleoside phosphate binding;nucleotide binding;orga…	bounding membrane of organelle;cellular anatomical entity;membrane;organelle membrane;plasma membrane;vacuolar membrane	cellular localization;cellular process;establishment of localization;localization;macromolecule localization;protein localization;protein transport;transport	cellular anatomical entity;membrane;plasma membrane		Ras		Cellmembrane;GTP-binding;Lipoprotein;Membrane;Methylation;Nucleotide-binding;Prenylation;Proteintransport;Referenceproteome;Transport		GO:0006810;GO:0008104;GO:0009987;GO:0015031;GO:0033036;GO:0045184;GO:0051179;GO:0051234;GO:0051641;GO:0070727;GO:0071702;GO:0071705	GO:0000166;GO:0003824;GO:0003924;GO:0005488;GO:0005525;GO:0016462;GO:0016787;GO:0016817;GO:0016818;GO:0017076;GO:0017111;GO:0019001;GO:0032553;GO:0032555;GO:0032561;GO:0035639;GO:0036094;GO:0043167;GO:0043168;GO:0097159;GO:0097367;GO:1901265;GO:1901363	GO:0005774;GO:0005886;GO:0016020;GO:0031090;GO:0098588;GO:0110165	GO:0006810;GO:0008104;GO:0009987;GO:0015031;GO:0033036;GO:0051179;GO:0051234;GO:0051641	GO:0005886;GO:0016020;GO:0110165	5	2	2	26.7	12.1	12.1	23.11	0	5.9474	8906500	3	0	Q43463;C6T714;C6SW30;A0A0R4J4C5;A0A0R0ENT1;C6TMF1;K7L6N7;I1K4R8;C6TJH6	Q43463;C6T714;C6SW30;A0A0R4J4C5;A0A0R0ENT1;C6TMF1	42	GLYMA_10G220100;GLYMA_20G171600	KRG91731;KRH35042	KRG91731;KRH35042
14.0326	14.9151	14.7215	14.8927	14.5557	15.0754	14.6253	14.2483	14.2505	12.798	12.8935	13.7936				-1										Referenceproteome							1	1	1	10.5	10.5	10.5	17.293	0	3.5417	448790	22	0	A0A0R0ENU4	A0A0R0ENU4	43	GLYMA_20G171000	KRG91722	KRG91722
18.5844	17.9136	18.5381	18.4246	18.7706	17.8784	18.4541	19.5209	19.5231	19.5533	18.2215	18.0509				-1		ADP catabolic process;ADP metabolic process;aromatic compound catabolic process;ATP metabolic process;carbohydrate catabolic process;carbohydrate derivative catabolic process;carbohydrate derivative metabolic process;carbohydrate metabolic process;carboxylic acid metabolic process;catabolic process;cellular aromatic compound metabolic process;cellular catabolic process;cellular metabolic process;…	adenyl nucleotide binding;adenyl ribonucleotide binding;alkali metal ion binding;anion binding;ATP binding;binding;carbohydrate derivative binding;catalytic activity;cation binding;heterocyclic compound binding;ion binding;kinase activity;magnesium ion binding;metal ion binding;nucleoside phosphate binding;nucleotide binding;organic cyclic compound binding;phosphotransferase activity, alcohol gro…	cellular anatomical entity;chloroplast stroma;cytoplasm;intracellular membrane-bounded organelle;intracellular organelle;membrane-bounded organelle;organelle;plastid stroma	carbohydrate derivative metabolic process;carbohydrate metabolic process;catabolic process;cellular aromatic compound metabolic process;cellular nitrogen compound metabolic process;cellular process;generation of precursor metabolites and energy;heterocycle metabolic process;metabolic process;monocarboxylic acid metabolic process;nitrogen compound metabolic process;nucleobase-containing compound c…	cellular anatomical entity;cytoplasm;intracellular membrane-bounded organelle;intracellular organelle;organelle		PK;PK_C		ATP-binding;Glycolysis;Kinase;Magnesium;Metal-binding;Nucleotide-binding;Pyruvate;Referenceproteome;Transferase		GO:0005975;GO:0006082;GO:0006090;GO:0006091;GO:0006096;GO:0006139;GO:0006163;GO:0006195;GO:0006725;GO:0006753;GO:0006793;GO:0006796;GO:0006807;GO:0008152;GO:0009056;GO:0009117;GO:0009132;GO:0009134;GO:0009135;GO:0009137;GO:0009141;GO:0009144;GO:0009150;GO:0009154;GO:0009166;GO:0009179;GO:0009181;GO:0009185;GO:0009191;GO:0009199;GO:0009205;GO:0009259;GO:0009261;GO:0009987;GO:0016052;GO:0016310;GO:…	GO:0000166;GO:0000287;GO:0003824;GO:0004743;GO:0005488;GO:0005524;GO:0016301;GO:0016740;GO:0016772;GO:0016773;GO:0017076;GO:0030554;GO:0030955;GO:0031420;GO:0032553;GO:0032555;GO:0032559;GO:0035639;GO:0036094;GO:0043167;GO:0043168;GO:0043169;GO:0046872;GO:0097159;GO:0097367;GO:1901265;GO:1901363	GO:0005737;GO:0009532;GO:0009570;GO:0043226;GO:0043227;GO:0043229;GO:0043231;GO:0110165	GO:0005975;GO:0006082;GO:0006090;GO:0006091;GO:0006139;GO:0006725;GO:0006793;GO:0006807;GO:0008152;GO:0009056;GO:0009117;GO:0009987;GO:0016310;GO:0032787;GO:0034641;GO:0034655;GO:0044238;GO:0044281;GO:0046483;GO:0055086;GO:1901135	GO:0005737;GO:0043226;GO:0043229;GO:0043231;GO:0110165	2	2	2	4.8	4.8	4.8	50.624	0	6.3064	8771500	15	0	A0A0R0EQG6;K7LK37;I1LEB9;I1NG47;I1LEB8	A0A0R0EQG6;K7LK37;I1LEB9;I1NG47;I1LEB8	45	GLYMA_10G178900;GLYMA_10G255100;GLYMA_20G136200;GLYMA_20G211200	KRG91145;KRG92440;KRH34357;KRH35631;KRH35632	KRG91145;KRG92440;KRH34357;KRH35631;KRH35632
18.3455	19.664	19.0898	19.666	19.7559	19.4782	19.479	19.5268	19.529	15.7329	15.4131	15.734				-1		cellular component organization;cellular component organization or biogenesis;cellular process;cortical cytoskeleton organization;cortical microtubule organization;cytoplasmic microtubule organization;cytoskeleton organization;microtubule cytoskeleton organization;microtubule-based process;organelle organization;supramolecular fiber organization		cellular anatomical entity;cortical microtubule;cortical microtubule, transverse to long axis;cytoplasmic microtubule;microtubule;polymeric cytoskeletal fiber;supramolecular complex;supramolecular fiber;supramolecular polymer	cellular component organization;cellular component organization or biogenesis;cellular process;cytoskeleton organization;microtubule cytoskeleton organization;microtubule-based process;organelle organization	cellular anatomical entity;microtubule				Referenceproteome		GO:0000226;GO:0006996;GO:0007010;GO:0007017;GO:0009987;GO:0016043;GO:0030865;GO:0031122;GO:0043622;GO:0071840;GO:0097435		GO:0005874;GO:0005881;GO:0010005;GO:0055028;GO:0099080;GO:0099081;GO:0099512;GO:0099513;GO:0110165	GO:0000226;GO:0006996;GO:0007010;GO:0007017;GO:0009987;GO:0016043;GO:0071840	GO:0005874;GO:0110165	2	2	2	28.8	28.8	28.8	15.409	0	30.482	6880500	44	3	A0A0R0ER52;C6SZE7;C6SXS0;I1LWT2	A0A0R0ER52;C6SZE7;C6SXS0;I1LWT2	46	GLYMA_13G055400;GLYMA_19G032000	KRG93666;KRH18375	KRG93666;KRH18375
19.209	18.8034	19.6327	19.01	20.0088	18.6713	19.6812	19.2306	19.0898	19.7161	18.8786	18.8462				-1		catabolic process;macromolecule catabolic process;macromolecule metabolic process;metabolic process;modification-dependent macromolecule catabolic process;modification-dependent protein catabolic process;nitrogen compound metabolic process;organic substance catabolic process;organic substance metabolic process;organonitrogen compound catabolic process;organonitrogen compound metabolic process;pri…	adenyl nucleotide binding;adenyl ribonucleotide binding;anion binding;ATP binding;ATP hydrolysis activity;ATP-dependent activity;binding;carbohydrate derivative binding;catalytic activity;heterocyclic compound binding;hydrolase activity;hydrolase activity, acting on acid anhydrides;hydrolase activity, acting on acid anhydrides, in phosphorus-containing anhydrides;ion binding;nucleoside phosphate …	catalytic complex;cellular anatomical entity;cytoplasm;endopeptidase complex;intracellular membrane-bounded organelle;intracellular organelle;intracellular protein-containing complex;membrane-bounded organelle;nucleus;organelle;peptidase complex;proteasome complex;proteasome regulatory particle, base subcomplex;protein-containing complex	catabolic process;macromolecule catabolic process;macromolecule metabolic process;metabolic process;nitrogen compound metabolic process;primary metabolic process;protein catabolic process;protein metabolic process;proteolysis;proteolysis involved in protein catabolic process	catalytic complex;cellular anatomical entity;cytoplasm;intracellular membrane-bounded organelle;intracellular organelle;nucleus;organelle;proteasome complex;protein-containing complex		AAA;AAA_lid_3;Prot_ATP_ID_OB		ATP-binding;Coiledcoil;Nucleotide-binding;Nucleus;Proteasome;Referenceproteome		GO:0006508;GO:0006511;GO:0006807;GO:0008152;GO:0009056;GO:0009057;GO:0010498;GO:0019538;GO:0019941;GO:0030163;GO:0043161;GO:0043170;GO:0043632;GO:0044238;GO:0051603;GO:0071704;GO:1901564;GO:1901565;GO:1901575	GO:0000166;GO:0003824;GO:0005488;GO:0005524;GO:0016462;GO:0016787;GO:0016817;GO:0016818;GO:0016887;GO:0017076;GO:0017111;GO:0030554;GO:0032553;GO:0032555;GO:0032559;GO:0035639;GO:0036094;GO:0036402;GO:0043167;GO:0043168;GO:0097159;GO:0097367;GO:0140657;GO:1901265;GO:1901363	GO:0000502;GO:0005634;GO:0005737;GO:0008540;GO:0032991;GO:0043226;GO:0043227;GO:0043229;GO:0043231;GO:0110165;GO:0140535;GO:1902494;GO:1905368;GO:1905369	GO:0006508;GO:0006807;GO:0008152;GO:0009056;GO:0009057;GO:0019538;GO:0030163;GO:0043170;GO:0044238;GO:0051603	GO:0000502;GO:0005634;GO:0005737;GO:0032991;GO:0043226;GO:0043229;GO:0043231;GO:0110165;GO:1902494	10	10	9	31.9	31.9	29.1	47.441	0	43.537	14018000	25	0	I1LBA2;C6TAN1;A0A0R0ERR0;I1NJ15;I1JRA0;A0A0R0ES83	I1LBA2;C6TAN1;A0A0R0ERR0;I1NJ15;I1JRA0	47	GLYMA_03G235200;GLYMA_10G151900;GLYMA_20G236500	KRG92899;KRG92900;KRH33891;KRH68501	KRG92899;KRG92900;KRH33891;KRH68501
22.1163	22.2064	22.7864	22.2704	22.3569	22.3959	22.0448	21.8191	21.8262	21.6495	21.0886	22.163				-1										Referenceproteome							5	5	5	26.8	26.8	26.8	19.496	0	78.709	90343000	143	0	C6SV71;A0A0R0ESZ7	C6SV71;A0A0R0ESZ7	49	GLYMA_19G012900	KRG93395	KRG93395
24.7875	23.92	24.024	24.028	23.9684	24.0329	24.112	24.1981	24.2003	24.8533	24.5554	24.1531				-1		amide biosynthetic process;amide metabolic process;biosynthetic process;cellular biosynthetic process;cellular metabolic process;cellular nitrogen compound biosynthetic process;cellular nitrogen compound metabolic process;cellular process;macromolecule biosynthetic process;macromolecule metabolic process;metabolic process;nitrogen compound metabolic process;organic substance biosynthetic process;…	anion binding;binding;carbohydrate derivative binding;catalytic activity;GTP binding;GTPase activity;guanyl nucleotide binding;guanyl ribonucleotide binding;heterocyclic compound binding;hydrolase activity;hydrolase activity, acting on acid anhydrides;hydrolase activity, acting on acid anhydrides, in phosphorus-containing anhydrides;ion binding;nucleic acid binding;nucleoside phosphate binding;nu…		amide metabolic process;biosynthetic process;cellular nitrogen compound metabolic process;cellular process;macromolecule biosynthetic process;macromolecule metabolic process;metabolic process;nitrogen compound metabolic process;peptide metabolic process;primary metabolic process;protein metabolic process;translation;translational elongation			GTP_EFTU;GTP_EFTU_D2;GTP_EFTU_D3		Elongationfactor;GTP-binding;Nucleotide-binding;Proteinbiosynthesis;Referenceproteome		GO:0006412;GO:0006414;GO:0006518;GO:0006807;GO:0008152;GO:0009058;GO:0009059;GO:0009987;GO:0019538;GO:0034641;GO:0043043;GO:0043170;GO:0043603;GO:0043604;GO:0044237;GO:0044238;GO:0044249;GO:0044271;GO:0071704;GO:1901564;GO:1901566;GO:1901576	GO:0000166;GO:0003676;GO:0003746;GO:0003824;GO:0003924;GO:0005488;GO:0005525;GO:0008135;GO:0016462;GO:0016787;GO:0016817;GO:0016818;GO:0017076;GO:0017111;GO:0019001;GO:0032553;GO:0032555;GO:0032561;GO:0035639;GO:0036094;GO:0043167;GO:0043168;GO:0045182;GO:0090079;GO:0097159;GO:0097367;GO:1901265;GO:1901363		GO:0006412;GO:0006414;GO:0006518;GO:0006807;GO:0008152;GO:0009058;GO:0009059;GO:0009987;GO:0019538;GO:0034641;GO:0043170;GO:0043603;GO:0044238		15	15	2	40.3	40.3	8.7	49.279	0	57.475	812440000	358	0	A0A0R0ESZ8;A0A0R0JTV5;A0A0R0EV63;O04299;A0A7T0IH71	A0A0R0ESZ8;A0A0R0JTV5	50	GLYMA_05G114900;GLYMA_19G052400	KRG93958;KRG93959;KRH58241	KRG93958;KRG93959;KRH58241
19.5524	19.8134	19.8447	19.5427	20.2625	20.5198	19.8098	19.4777	19.4861	20.0705	20.1529	19.5476				-1		cellular process;macromolecule metabolic process;macromolecule modification;metabolic process;nitrogen compound metabolic process;organic substance metabolic process;organonitrogen compound metabolic process;peptidyl-amino acid modification;peptidyl-proline modification;primary metabolic process;protein folding;protein metabolic process;protein modification process;protein peptidyl-prolyl isomeri…	amide binding;binding;catalytic activity;catalytic activity, acting on a protein;cis-trans isomerase activity;cyclosporin A binding;isomerase activity;peptide binding;peptidyl-prolyl cis-trans isomerase activity	cellular anatomical entity;cytoplasm	cellular process;macromolecule metabolic process;macromolecule modification;metabolic process;nitrogen compound metabolic process;peptidyl-amino acid modification;primary metabolic process;protein folding;protein metabolic process;protein modification process	cellular anatomical entity;cytoplasm		Pro_isomerase		Isomerase;Referenceproteome;Rotamase		GO:0000413;GO:0006457;GO:0006807;GO:0008152;GO:0009987;GO:0018193;GO:0018208;GO:0019538;GO:0036211;GO:0043170;GO:0043412;GO:0044238;GO:0071704;GO:1901564	GO:0003755;GO:0003824;GO:0005488;GO:0016018;GO:0016853;GO:0016859;GO:0033218;GO:0042277;GO:0140096	GO:0005737;GO:0110165	GO:0006457;GO:0006807;GO:0008152;GO:0009987;GO:0018193;GO:0019538;GO:0036211;GO:0043170;GO:0043412;GO:0044238	GO:0005737;GO:0110165	8	6	6	50.3	41.7	41.7	18.955	0	57.561	25016000	38	0	A0A0R0ETG1;C6SYQ9;A0A0R4J318;I1JEW8;A0A0R0GCC6;K7KIK5;I1K8X4;A0A0R0JJE4;I1N9L1;I1N9L2;I1KLX5;I1K1S1;C6TJ00;A0A0R4J5S0;A0A0R0FPY7;C6TBD7;A0A0R4J4Q0;I1LJ10;C6TGD4;I1JSE7;I1K8X2	A0A0R0ETG1;C6SYQ9	51	GLYMA_19G249000	KRG97055;KRG97056	KRG97055;KRG97056
18.35	18.2375	18.708	19.1072	15.943	18.3933	18.7271	18.54	18.6517	18.4328	18.5017	18.2199				-1		catabolic process;macromolecule catabolic process;macromolecule metabolic process;metabolic process;modification-dependent macromolecule catabolic process;modification-dependent protein catabolic process;nitrogen compound metabolic process;organic substance catabolic process;organic substance metabolic process;organonitrogen compound catabolic process;organonitrogen compound metabolic process;pri…	adenyl nucleotide binding;adenyl ribonucleotide binding;anion binding;ATP binding;ATP hydrolysis activity;ATP-dependent activity;binding;carbohydrate derivative binding;catalytic activity;heterocyclic compound binding;hydrolase activity;hydrolase activity, acting on acid anhydrides;hydrolase activity, acting on acid anhydrides, in phosphorus-containing anhydrides;ion binding;nucleoside phosphate …	cellular anatomical entity;cytoplasm;intracellular membrane-bounded organelle;intracellular organelle;membrane-bounded organelle;nucleus;organelle;proteasome regulatory particle, base subcomplex;protein-containing complex	catabolic process;macromolecule catabolic process;macromolecule metabolic process;metabolic process;nitrogen compound metabolic process;primary metabolic process;protein catabolic process;protein metabolic process;proteolysis;proteolysis involved in protein catabolic process	cellular anatomical entity;cytoplasm;intracellular membrane-bounded organelle;intracellular organelle;nucleus;organelle;protein-containing complex		AAA;AAA_lid_3;Prot_ATP_ID_OB		ATP-binding;Coiledcoil;Nucleotide-binding;Nucleus;Proteasome;Referenceproteome		GO:0006508;GO:0006511;GO:0006807;GO:0008152;GO:0009056;GO:0009057;GO:0010498;GO:0019538;GO:0019941;GO:0030163;GO:0043161;GO:0043170;GO:0043632;GO:0044238;GO:0051603;GO:0071704;GO:1901564;GO:1901565;GO:1901575	GO:0000166;GO:0003824;GO:0005488;GO:0005524;GO:0016462;GO:0016787;GO:0016817;GO:0016818;GO:0016887;GO:0017076;GO:0017111;GO:0030554;GO:0032553;GO:0032555;GO:0032559;GO:0035639;GO:0036094;GO:0036402;GO:0043167;GO:0043168;GO:0097159;GO:0097367;GO:0140657;GO:1901265;GO:1901363	GO:0005634;GO:0005737;GO:0008540;GO:0032991;GO:0043226;GO:0043227;GO:0043229;GO:0043231;GO:0110165	GO:0006508;GO:0006807;GO:0008152;GO:0009056;GO:0009057;GO:0019538;GO:0030163;GO:0043170;GO:0044238;GO:0051603	GO:0005634;GO:0005737;GO:0032991;GO:0043226;GO:0043229;GO:0043231;GO:0110165	5	4	4	17.4	14.5	14.5	46.413	0	17.307	5270500	77	1	I1LLZ2;A0A0R0EW30;A0A0R4J4L8	I1LLZ2;A0A0R0EW30;A0A0R4J4L8	55	GLYMA_11G199900;GLYMA_11G200000;GLYMA_18G050900	KRG98107;KRH30673;KRH30674	KRG98107;KRH30673;KRH30674
16.3441	17.8748	17.5168	17.7657	17.4479	15.7682	16.9287	17.2239	18.0997	19.0338	18.1179	17.8693				-1		catabolic process;cellular process;cellular response to stimulus;cellular response to stress;DNA damage response;macromolecule catabolic process;macromolecule metabolic process;macromolecule modification;metabolic process;modification-dependent macromolecule catabolic process;modification-dependent protein catabolic process;nitrogen compound metabolic process;organic substance catabolic process;o…	adenyl nucleotide binding;adenyl ribonucleotide binding;anion binding;ATP binding;ATP-dependent activity;binding;carbohydrate derivative binding;catalytic activity;catalytic activity, acting on a protein;heterocyclic compound binding;ion binding;ligase activity;ligase activity, forming carbon-sulfur bonds;nucleoside phosphate binding;nucleotide binding;organic cyclic compound binding;purine nucle…	cellular anatomical entity;cytoplasm;intracellular membrane-bounded organelle;intracellular organelle;membrane;membrane-bounded organelle;nucleus;organelle	catabolic process;cellular process;DNA damage response;macromolecule catabolic process;macromolecule metabolic process;macromolecule modification;metabolic process;nitrogen compound metabolic process;primary metabolic process;protein metabolic process;protein modification by small protein conjugation or removal;protein modification process;proteolysis;proteolysis involved in protein catabolic pro…	cellular anatomical entity;cytoplasm;intracellular membrane-bounded organelle;intracellular organelle;membrane;nucleus;organelle		E1_4HB;E1_FCCH;E1_UFD;ThiF;UBA_E1_SCCH		ATP-binding;Ligase;Membrane;Nucleotide-binding;Referenceproteome;Transmembrane;Transmembranehelix;Ublconjugationpathway		GO:0006508;GO:0006511;GO:0006807;GO:0006950;GO:0006974;GO:0008152;GO:0009056;GO:0009057;GO:0009987;GO:0016567;GO:0019538;GO:0019941;GO:0032446;GO:0033554;GO:0036211;GO:0043170;GO:0043412;GO:0043632;GO:0043687;GO:0044238;GO:0050896;GO:0051603;GO:0051716;GO:0070647;GO:0071704;GO:1901564;GO:1901575	GO:0000166;GO:0003824;GO:0004839;GO:0005488;GO:0005524;GO:0008641;GO:0016874;GO:0016877;GO:0017076;GO:0030554;GO:0032553;GO:0032555;GO:0032559;GO:0035639;GO:0036094;GO:0043167;GO:0043168;GO:0097159;GO:0097367;GO:0140096;GO:0140657;GO:1901265;GO:1901363	GO:0005634;GO:0005737;GO:0016020;GO:0043226;GO:0043227;GO:0043229;GO:0043231;GO:0110165	GO:0006508;GO:0006807;GO:0006950;GO:0006974;GO:0008152;GO:0009056;GO:0009057;GO:0009987;GO:0019538;GO:0036211;GO:0043170;GO:0043412;GO:0044238;GO:0050896;GO:0051603;GO:0070647	GO:0005634;GO:0005737;GO:0016020;GO:0043226;GO:0043229;GO:0043231;GO:0110165	4	4	4	7.9	7.9	7.9	89.83	0	7.7906	2799400	8	4	A0A0R0EWS1;K7KA83;I1MZW3;K7M828;A0A0R0GFI8;K7LR00	A0A0R0EWS1;K7KA83;I1MZW3;K7M828;A0A0R0GFI8;K7LR00	56	GLYMA_02G229700;GLYMA_11G166100;GLYMA_14G196800;GLYMA_18G058900	KRG98232;KRG98233;KRH17078;KRH17079;KRH17080;KRH30189;KRH72725;KRH72726	KRG98232;KRG98233;KRH17078;KRH17079;KRH17080;KRH30189;KRH72725;KRH72726
21.0235	21.2618	20.4859	20.7927	21.3752	21.3191	20.69	19.3299	19.3319	21.4309	19.8947	20.1733				-1		cellular localization;cellular macromolecule localization;cellular process;establishment of localization;establishment of protein localization;establishment of protein localization to membrane;localization;localization within membrane;macromolecule localization;protein localization;protein localization to membrane;protein targeting;protein targeting to membrane	binding;protein binding;unfolded protein binding	cellular anatomical entity;cytoplasm;nascent polypeptide-associated complex;protein-containing complex	cellular localization;cellular process;establishment of localization;localization;macromolecule localization;protein localization;protein targeting	cellular anatomical entity;cytoplasm;protein-containing complex		HYPK_UBA;NAC		Referenceproteome		GO:0006605;GO:0006612;GO:0008104;GO:0009987;GO:0033036;GO:0045184;GO:0051179;GO:0051234;GO:0051641;GO:0051668;GO:0070727;GO:0072657;GO:0090150	GO:0005488;GO:0005515;GO:0051082	GO:0005737;GO:0005854;GO:0032991;GO:0110165	GO:0006605;GO:0008104;GO:0009987;GO:0033036;GO:0051179;GO:0051234;GO:0051641	GO:0005737;GO:0032991;GO:0110165	5	5	1	34.8	34.8	7.5	21.927	0	80.511	42405000	56	0	I1N8M5;I1JMZ3;C6SZW0;A0A0R0EWX9;C6T3S3	I1N8M5;I1JMZ3;C6SZW0;A0A0R0EWX9;C6T3S3	57	GLYMA_03G120800;GLYMA_19G125500	KRG95032;KRG95033;KRH66664	KRG95032;KRG95033;KRH66664
23.6242	22.6389	21.5473	21.7923	22.0278	22.0982	21.7453	20.8267	20.829	24.3928	23.2917	22.563				-1		cellular component assembly;cellular component organization;cellular component organization or biogenesis;cellular process;chromatin organization;chromatin remodeling;nucleosome assembly;nucleosome organization;protein-containing complex assembly;protein-containing complex organization;protein-DNA complex assembly;protein-DNA complex organization	binding;DNA binding;nucleic acid binding;organic cyclic compound binding;protein binding;protein dimerization activity;protein heterodimerization activity;structural constituent of chromatin;structural molecule activity	cellular anatomical entity;intracellular membrane-bounded organelle;intracellular organelle;membrane-bounded organelle;nucleosome;nucleus;organelle;protein-containing complex;protein-DNA complex	cellular component assembly;cellular component organization;cellular component organization or biogenesis;cellular process;chromatin organization;protein-containing complex assembly	cellular anatomical entity;intracellular membrane-bounded organelle;intracellular organelle;nucleosome;nucleus;organelle;protein-containing complex;protein-DNA complex		CENP-T_C		Acetylation;Chromosome;DNA-binding;Methylation;Nucleosomecore;Nucleus;Referenceproteome		GO:0006325;GO:0006334;GO:0006338;GO:0009987;GO:0016043;GO:0022607;GO:0034728;GO:0043933;GO:0065003;GO:0065004;GO:0071824;GO:0071840	GO:0003676;GO:0003677;GO:0005198;GO:0005488;GO:0005515;GO:0030527;GO:0046982;GO:0046983;GO:0097159	GO:0000786;GO:0005634;GO:0032991;GO:0032993;GO:0043226;GO:0043227;GO:0043229;GO:0043231;GO:0110165	GO:0006325;GO:0009987;GO:0016043;GO:0022607;GO:0065003;GO:0071840	GO:0000786;GO:0005634;GO:0032991;GO:0032993;GO:0043226;GO:0043229;GO:0043231;GO:0110165	6	6	6	51.5	51.5	51.5	11.409	0	51.949	364430000	255	0	P0CG89;B9MST3;A0A0R0EX12;A0A0R0EXQ1;K7MMV2;I1L934	P0CG89;B9MST3;A0A0R0EX12;A0A0R0EXQ1;K7MMV2;I1L934	58	GLYMA_02G224100;GLYMA_03G171400;GLYMA_10G062400;GLYMA_10G133500;GLYMA_11G177800;GLYMA_11G177900;GLYMA_11G178100;GLYMA_11G178200;GLYMA_12G074500;GLYMA_13G147000;GLYMA_14G190800;GLYMA_15G043200;GLYMA_17G063200;GLYMA_17G203400;GLYMA_18G064300;GLYMA_18G064400;GLYMA_19G172500;GLYMA_20G083800;GLYMA_U033600	KRG88688;KRG90333;KRG95810;KRG98308;KRG98309;KRH02870;KRH05033;KRH10344;KRH10345;KRH16996;KRH19969;KRH24981;KRH30344;KRH30345;KRH30347;KRH30348;KRH32592;KRH33582;KRH67535;KRH72633	KRG88688;KRG90333;KRG95810;KRG98308;KRG98309;KRH02870;KRH05033;KRH10344;KRH10345;KRH16996;KRH19969;KRH24981;KRH30344;KRH30345;KRH30347;KRH30348;KRH32592;KRH33582;KRH67535;KRH72633
19.3478	19.5047	19.2099	19.1764	19.7818	19.8931	19.9107	19.4505	19.2625	20.3555	18.9641	19.5824				-1		biological regulation;regulation of biological process;regulation of biosynthetic process;regulation of cellular biosynthetic process;regulation of cellular metabolic process;regulation of cellular process;regulation of gene expression;regulation of macromolecule biosynthetic process;regulation of macromolecule metabolic process;regulation of metabolic process	binding;mRNA binding;nucleic acid binding;organic cyclic compound binding;RNA binding	cellular anatomical entity;cytoplasm;intracellular membrane-bounded organelle;intracellular organelle;membrane-bounded organelle;nucleus;organelle	biological regulation;regulation of biological process;regulation of metabolic process	cellular anatomical entity;cytoplasm;intracellular membrane-bounded organelle;intracellular organelle;nucleus;organelle		KH_1		Referenceproteome;RNA-binding		GO:0009889;GO:0010468;GO:0010556;GO:0019222;GO:0031323;GO:0031326;GO:0050789;GO:0050794;GO:0060255;GO:0065007	GO:0003676;GO:0003723;GO:0003729;GO:0005488;GO:0097159	GO:0005634;GO:0005737;GO:0043226;GO:0043227;GO:0043229;GO:0043231;GO:0110165	GO:0019222;GO:0050789;GO:0065007	GO:0005634;GO:0005737;GO:0043226;GO:0043229;GO:0043231;GO:0110165	5	5	5	11.6	11.6	11.6	56.084	0	26.917	15143000	18	0	I1N9N6;A0A0R0EX89;I1JP06;I1JP07;I1JP08;C6TAR9;K7K8A2;K7K8A1;I1L8B2;A0A0R0HNU9	I1N9N6;A0A0R0EX89;I1JP06;I1JP07;I1JP08	59	GLYMA_03G160000;GLYMA_19G162000	KRG95633;KRG95634;KRH67322;KRH67323;KRH67324;KRH67325	KRG95633;KRG95634;KRH67322;KRH67323;KRH67324;KRH67325
17.1072	17.4681	17.0399	17.44	16.7393	17.6602	17.6926	16.2986	16.0564	17.1079	16.9441	16.7093				-1		catabolic process;macromolecule catabolic process;macromolecule metabolic process;metabolic process;modification-dependent macromolecule catabolic process;modification-dependent protein catabolic process;nitrogen compound metabolic process;organic substance catabolic process;organic substance metabolic process;organonitrogen compound catabolic process;organonitrogen compound metabolic process;pri…	adenyl nucleotide binding;adenyl ribonucleotide binding;anion binding;ATP binding;ATP hydrolysis activity;ATP-dependent activity;binding;carbohydrate derivative binding;catalytic activity;heterocyclic compound binding;hydrolase activity;hydrolase activity, acting on acid anhydrides;hydrolase activity, acting on acid anhydrides, in phosphorus-containing anhydrides;ion binding;nucleoside phosphate …	cellular anatomical entity;cytoplasm;intracellular membrane-bounded organelle;intracellular organelle;membrane-bounded organelle;nucleus;organelle;proteasome regulatory particle, base subcomplex;protein-containing complex	catabolic process;macromolecule catabolic process;macromolecule metabolic process;metabolic process;nitrogen compound metabolic process;primary metabolic process;protein catabolic process;protein metabolic process;proteolysis;proteolysis involved in protein catabolic process	cellular anatomical entity;cytoplasm;intracellular membrane-bounded organelle;intracellular organelle;nucleus;organelle;protein-containing complex		AAA;AAA_lid_3;Prot_ATP_ID_OB		ATP-binding;Nucleotide-binding;Nucleus;Proteasome;Referenceproteome		GO:0006508;GO:0006511;GO:0006807;GO:0008152;GO:0009056;GO:0009057;GO:0010498;GO:0019538;GO:0019941;GO:0030163;GO:0043161;GO:0043170;GO:0043632;GO:0044238;GO:0051603;GO:0071704;GO:1901564;GO:1901565;GO:1901575	GO:0000166;GO:0003824;GO:0005488;GO:0005524;GO:0016462;GO:0016787;GO:0016817;GO:0016818;GO:0016887;GO:0017076;GO:0017111;GO:0030554;GO:0032553;GO:0032555;GO:0032559;GO:0035639;GO:0036094;GO:0036402;GO:0043167;GO:0043168;GO:0097159;GO:0097367;GO:0140657;GO:1901265;GO:1901363	GO:0005634;GO:0005737;GO:0008540;GO:0032991;GO:0043226;GO:0043227;GO:0043229;GO:0043231;GO:0110165	GO:0006508;GO:0006807;GO:0008152;GO:0009056;GO:0009057;GO:0019538;GO:0030163;GO:0043170;GO:0044238;GO:0051603	GO:0005634;GO:0005737;GO:0032991;GO:0043226;GO:0043229;GO:0043231;GO:0110165	3	3	3	12.6	12.6	12.6	49.343	0	35.545	2539700	36	1	A0A0R4J4W3;A0A0R4J439;A0A0R4J302;A0A0R0EXW6;K7L9E4	A0A0R4J4W3;A0A0R4J439;A0A0R4J302;A0A0R0EXW6	61	GLYMA_03G170600;GLYMA_10G043000;GLYMA_13G130400;GLYMA_19G171700	KRG95799;KRH19693;KRH32292;KRH67524	KRG95799;KRH19693;KRH32292;KRH67524
19.102	18.5723	19.6979	18.9451	19.7179	19.2162	19.8793	19.5042	19.5064	20.0757	19.2304	19.5324				-1		biosynthetic process;lipid biosynthetic process;lipid metabolic process;metabolic process;organic cyclic compound biosynthetic process;organic cyclic compound metabolic process;organic substance biosynthetic process;organic substance metabolic process;primary metabolic process;steroid biosynthetic process;steroid metabolic process	3-beta-hydroxy-delta5-steroid dehydrogenase activity;catalytic activity;oxidoreductase activity;oxidoreductase activity, acting on CH-OH group of donors;oxidoreductase activity, acting on the CH-OH group of donors, NAD or NADP as acceptor;steroid dehydrogenase activity;steroid dehydrogenase activity, acting on the CH-OH group of donors, NAD or NADP as acceptor		biosynthetic process;lipid metabolic process;metabolic process;primary metabolic process			3Beta_HSD;Epimerase		Referenceproteome		GO:0006629;GO:0006694;GO:0008152;GO:0008202;GO:0008610;GO:0009058;GO:0044238;GO:0071704;GO:1901360;GO:1901362;GO:1901576	GO:0003824;GO:0003854;GO:0016229;GO:0016491;GO:0016614;GO:0016616;GO:0033764		GO:0006629;GO:0008152;GO:0009058;GO:0044238		2	2	2	8	8	8	35.749	0	11.007	14141000	13	0	I1N0K1;C6THW7;A0A0R0EY92;A0A0R0J5S1;K7MQS5;A0A0R0F7V6	I1N0K1;C6THW7;A0A0R0EY92;A0A0R0J5S1;K7MQS5;A0A0R0F7V6	62	GLYMA_08G320900;GLYMA_18G091300;GLYMA_18G091500	KRG98694;KRG98695;KRG98697;KRG98698;KRH46239	KRG98694;KRG98695;KRG98697;KRG98698;KRH46239
18.8616	19.1373	18.8898	19.0174	18.9685	19.2185	18.9952	19.145	19.1472	18.3204	18.9932	19.3254				-1		catabolic process;metabolic process;nitrogen compound metabolic process;organic substance catabolic process;organic substance metabolic process;organonitrogen compound catabolic process;organonitrogen compound metabolic process	catalytic activity;deaminase activity;hydrolase activity;hydrolase activity, acting on carbon-nitrogen (but not peptide) bonds	cellular anatomical entity;cytosol	catabolic process;metabolic process;nitrogen compound metabolic process	cellular anatomical entity;cytosol		Ribonuc_L-PSP		Referenceproteome		GO:0006807;GO:0008152;GO:0009056;GO:0071704;GO:1901564;GO:1901565;GO:1901575	GO:0003824;GO:0016787;GO:0016810;GO:0019239	GO:0005829;GO:0110165	GO:0006807;GO:0008152;GO:0009056	GO:0005829;GO:0110165	6	4	4	42	36.9	36.9	16.794	0	28.256	12080000	69	0	A0A0R0EYI4;A0A0R0F6V1;I1N0P5;I1KY80	A0A0R0EYI4;A0A0R0F6V1;I1N0P5;I1KY80	63	GLYMA_08G316200;GLYMA_18G096900	KRG98768;KRG98769;KRG98770;KRH46176;KRH46177	KRG98768;KRG98769;KRG98770;KRH46176;KRH46177
20.7381	20.8759	21.1914	20.8396	21.0249	14.5786	21.344	20.3355	20.3377	20.6256	20.486	20.4253				-1		catabolic process;cellular aromatic compound metabolic process;cellular metabolic process;cellular nitrogen compound metabolic process;cellular process;cellular response to stimulus;cellular response to stress;DNA damage response;DNA metabolic process;DNA repair;heterocycle metabolic process;histone modification;histone ubiquitination;macromolecule catabolic process;macromolecule metabolic proces…	acyltransferase activity;adenyl nucleotide binding;adenyl ribonucleotide binding;aminoacyltransferase activity;anion binding;ATP binding;binding;carbohydrate derivative binding;catalytic activity;catalytic activity, acting on a protein;heterocyclic compound binding;ion binding;nucleoside phosphate binding;nucleotide binding;organic cyclic compound binding;purine nucleotide binding;purine ribonucl…	cellular anatomical entity;membrane	catabolic process;cellular aromatic compound metabolic process;cellular nitrogen compound metabolic process;cellular process;DNA damage response;DNA metabolic process;DNA repair;heterocycle metabolic process;histone modification;macromolecule catabolic process;macromolecule metabolic process;macromolecule modification;metabolic process;nitrogen compound metabolic process;nucleobase-containing com…	cellular anatomical entity;membrane		UQ_con		ATP-binding;Membrane;Nucleotide-binding;Referenceproteome;Transferase;Transmembrane;Transmembranehelix;Ublconjugationpathway		GO:0000209;GO:0006139;GO:0006259;GO:0006281;GO:0006508;GO:0006511;GO:0006725;GO:0006807;GO:0006950;GO:0006974;GO:0008152;GO:0009056;GO:0009057;GO:0009987;GO:0010498;GO:0016567;GO:0016570;GO:0016574;GO:0019538;GO:0019941;GO:0030163;GO:0032446;GO:0033554;GO:0034641;GO:0036211;GO:0043161;GO:0043170;GO:0043412;GO:0043632;GO:0043687;GO:0044237;GO:0044238;GO:0046483;GO:0050896;GO:0051603;GO:0051716;GO:…	GO:0000166;GO:0003824;GO:0004842;GO:0005488;GO:0005524;GO:0016740;GO:0016746;GO:0016755;GO:0017076;GO:0019787;GO:0030554;GO:0032553;GO:0032555;GO:0032559;GO:0035639;GO:0036094;GO:0043167;GO:0043168;GO:0061631;GO:0061650;GO:0097159;GO:0097367;GO:0140096;GO:1901265;GO:1901363	GO:0016020;GO:0110165	GO:0006139;GO:0006259;GO:0006281;GO:0006508;GO:0006725;GO:0006807;GO:0006950;GO:0006974;GO:0008152;GO:0009056;GO:0009057;GO:0009987;GO:0016570;GO:0019538;GO:0030163;GO:0034641;GO:0036211;GO:0043170;GO:0043412;GO:0044238;GO:0046483;GO:0050896;GO:0051603;GO:0070647	GO:0016020;GO:0110165	1	1	1	14.7	14.7	14.7	13.299	0.0016045	2.1649	19568000	17	1	I1KCQ0;I1JBP0;A0A0R0EZF0;I1KXR3;C6SYH9;C6SWF0;C6SVL7	I1KCQ0;I1JBP0;A0A0R0EZF0;I1KXR3;C6SYH9;C6SWF0;C6SVL7	64	GLYMA_02G020000;GLYMA_04G173300;GLYMA_05G028800;GLYMA_06G190900;GLYMA_08G297300;GLYMA_18G124600	KRG99148;KRH45858;KRH45859;KRH54510;KRH56939;KRH63396;KRH69329;KRH69330	KRG99148;KRH45858;KRH45859;KRH54510;KRH56939;KRH63396;KRH69329;KRH69330
16.3409	19.8294	20.0089	20.25	20.0325	19.6012	20.0821	19.6254	19.6276	19.4048	19.7061	19.3045				-1		biological regulation;defense response;regulation of biological process;regulation of biosynthetic process;regulation of cellular biosynthetic process;regulation of cellular metabolic process;regulation of cellular process;regulation of DNA-templated transcription;regulation of gene expression;regulation of macromolecule biosynthetic process;regulation of macromolecule metabolic process;regulatio…	binding;DNA binding;nucleic acid binding;organic cyclic compound binding;single-stranded DNA binding		biological regulation;regulation of biological process;regulation of DNA-templated transcription;regulation of metabolic process;response to stimulus;response to stress			Whirly		Referenceproteome		GO:0006355;GO:0006950;GO:0006952;GO:0009889;GO:0010468;GO:0010556;GO:0019219;GO:0019222;GO:0031323;GO:0031326;GO:0050789;GO:0050794;GO:0050896;GO:0051171;GO:0051252;GO:0060255;GO:0065007;GO:0080090;GO:2001141	GO:0003676;GO:0003677;GO:0003697;GO:0005488;GO:0097159		GO:0006355;GO:0006950;GO:0019222;GO:0050789;GO:0050896;GO:0065007		2	2	2	19.4	19.4	19.4	20.572	0	19.069	14334000	24	1	I1KXQ9;A0A0R0EZG1;K7MRN0;I1KXR0;I1N183;I1KXR1;I1KXQ8	I1KXQ9;A0A0R0EZG1;K7MRN0;I1KXR0;I1N183;I1KXR1;I1KXQ8	65	GLYMA_08G297200;GLYMA_18G124800	KRG99151;KRG99152;KRG99153;KRH45854;KRH45855;KRH45856;KRH45857	KRG99151;KRG99152;KRG99153;KRH45854;KRH45855;KRH45856;KRH45857
17.8231	17.8042	18.169	17.9903	15.8732	17.7585	16.9568	15.9202	15.5724	16.2967	17.3095	17.59				-1		cellular metabolic process;cellular process;metabolic process;phosphate-containing compound metabolic process;phosphorus metabolic process	binding;catalytic activity;cation binding;hydrolase activity;hydrolase activity, acting on acid anhydrides;hydrolase activity, acting on acid anhydrides, in phosphorus-containing anhydrides;inorganic diphosphate phosphatase activity;ion binding;magnesium ion binding;metal ion binding;pyrophosphatase activity	cellular anatomical entity;cytoplasm;cytosol	cellular process;metabolic process;phosphorus metabolic process	cellular anatomical entity;cytoplasm;cytosol		Pyrophosphatase		Hydrolase;Magnesium;Metal-binding;Referenceproteome		GO:0006793;GO:0006796;GO:0008152;GO:0009987;GO:0044237	GO:0000287;GO:0003824;GO:0004427;GO:0005488;GO:0016462;GO:0016787;GO:0016817;GO:0016818;GO:0043167;GO:0043169;GO:0046872	GO:0005737;GO:0005829;GO:0110165	GO:0006793;GO:0008152;GO:0009987	GO:0005737;GO:0005829;GO:0110165	4	1	1	26.6	7.9	7.9	25.904	0	9.7307	1461400	2	5	A0A0R0EZU8;I1NA04;I1NA05;K7K9V4;A0A0R0EZ04;K7N0F4;I1JS54;I1KHM5;C6T1I1	A0A0R0EZU8;I1NA04;I1NA05	66	GLYMA_19G173600	KRG95822;KRG95823;KRG95824;KRG95825	KRG95822;KRG95823;KRG95824;KRG95825
16.715	19.075	19.1724	19.3049	19.6368	16.5208	18.9727	19.2316	19.2338	14.9283	19.0986	16.3205				-1		cellular metabolic process;cellular process;electron transport chain;generation of precursor metabolites and energy;metabolic process;P450-containing electron transport chain	2 iron, 2 sulfur cluster binding;binding;iron-sulfur cluster binding;metal cluster binding	cellular anatomical entity;intracellular membrane-bounded organelle;intracellular organelle;membrane-bounded organelle;mitochondrion;organelle	cellular process;electron transport chain;generation of precursor metabolites and energy;metabolic process	cellular anatomical entity;intracellular membrane-bounded organelle;intracellular organelle;mitochondrion;organelle				Referenceproteome		GO:0006091;GO:0008152;GO:0009987;GO:0022900;GO:0044237;GO:0140647	GO:0005488;GO:0051536;GO:0051537;GO:0051540	GO:0005739;GO:0043226;GO:0043227;GO:0043229;GO:0043231;GO:0110165	GO:0006091;GO:0008152;GO:0009987;GO:0022900	GO:0005739;GO:0043226;GO:0043229;GO:0043231;GO:0110165	3	3	3	24.4	24.4	24.4	17.459	0	5.8852	9091000	14	4	A0A0R0F0E0;I1KYX9	A0A0R0F0E0;I1KYX9	68	GLYMA_08G343100;GLYMA_18G153900	KRG99558;KRH46572	KRG99558;KRH46572
15.3228	16.893	16.9842	17.0714	16.9947	17.1156	17.0264	16.6033	15.2119	14.7715	14.5322	16.7179				-1								SAM_1		Referenceproteome							1	1	1	15.9	15.9	15.9	11.797	0	3.057	919860	11	1	A0A0R0F0P9;I1KZ58;I1KZ55;C6T3X0	A0A0R0F0P9;I1KZ58;I1KZ55;C6T3X0	69	GLYMA_08G349900;GLYMA_18G166400	KRG99723;KRH46669;KRH46671	KRG99723;KRH46669;KRH46671
18.6387	18.3244	18.6916	18.5656	16.0431	18.5598	18.8925	18.6517	18.6539	16.5158	15.3664	19.1743				-1			catalytic activity;oxidoreductase activity					adh_short;adh_short_C2		Referenceproteome			GO:0003824;GO:0016491				3	3	2	15.1	15.1	11.3	22.95	0	7.9736	4891300	8	3	C6T6Q8;A0A0R0F1L5;C6TF75;A0A0R0F1H8;C6T7C6;I1KK25;K7L1I3	C6T6Q8;A0A0R0F1L5	71	GLYMA_18G186400	KRH00026	KRH00026
16.1878	14.9145	14.799	15.6518	14.4708	17.3433	16.0759	14.0509	14.0523	13.4671	14.1833	14.252				-1		biological regulation;cellular component organization;cellular component organization or biogenesis;cellular localization;cellular macromolecule localization;cellular process;endoplasmic reticulum to Golgi vesicle-mediated transport;establishment of localization;establishment of localization in cell;establishment of protein localization;Golgi vesicle transport;intracellular protein transport;intr…	anion binding;binding;carbohydrate derivative binding;catalytic activity;GTP binding;GTPase activity;guanyl nucleotide binding;guanyl ribonucleotide binding;heterocyclic compound binding;hydrolase activity;hydrolase activity, acting on acid anhydrides;hydrolase activity, acting on acid anhydrides, in phosphorus-containing anhydrides;ion binding;nucleoside phosphate binding;nucleotide binding;orga…	cellular anatomical entity;COPII vesicle coat;endoplasmic reticulum;endoplasmic reticulum exit site;Golgi apparatus;intracellular membrane-bounded organelle;intracellular organelle;membrane coat;membrane protein complex;membrane-bounded organelle;organelle;protein-containing complex;vesicle coat	biological regulation;cellular component organization;cellular component organization or biogenesis;cellular localization;cellular process;establishment of localization;Golgi vesicle transport;intracellular protein transport;localization;macromolecule localization;membrane organization;organelle organization;protein localization;protein transport;regulation of biological process;regulation of org…	cellular anatomical entity;endoplasmic reticulum;Golgi apparatus;intracellular membrane-bounded organelle;intracellular organelle;membrane protein complex;organelle;protein-containing complex		Arf		Endoplasmicreticulum;ER-Golgitransport;Golgiapparatus;GTP-binding;Nucleotide-binding;Proteintransport;Referenceproteome;Signal;Transport		GO:0003400;GO:0006810;GO:0006886;GO:0006888;GO:0006996;GO:0008104;GO:0009987;GO:0015031;GO:0016043;GO:0016050;GO:0016192;GO:0032386;GO:0032388;GO:0032879;GO:0032880;GO:0033036;GO:0033043;GO:0033157;GO:0043254;GO:0044087;GO:0045184;GO:0046907;GO:0048193;GO:0048518;GO:0048522;GO:0050789;GO:0050794;GO:0051049;GO:0051050;GO:0051128;GO:0051179;GO:0051222;GO:0051223;GO:0051234;GO:0051641;GO:0051649;GO:…	GO:0000166;GO:0003824;GO:0003924;GO:0005488;GO:0005525;GO:0016462;GO:0016787;GO:0016817;GO:0016818;GO:0017076;GO:0017111;GO:0019001;GO:0032553;GO:0032555;GO:0032561;GO:0035639;GO:0036094;GO:0043167;GO:0043168;GO:0097159;GO:0097367;GO:1901265;GO:1901363	GO:0005783;GO:0005794;GO:0030117;GO:0030120;GO:0030127;GO:0032991;GO:0043226;GO:0043227;GO:0043229;GO:0043231;GO:0070971;GO:0098796;GO:0110165	GO:0006810;GO:0006886;GO:0006996;GO:0008104;GO:0009987;GO:0015031;GO:0016043;GO:0016050;GO:0016192;GO:0032880;GO:0033036;GO:0033043;GO:0048193;GO:0050789;GO:0051049;GO:0051179;GO:0051234;GO:0051641;GO:0061024;GO:0065007;GO:0071840	GO:0005783;GO:0005794;GO:0032991;GO:0043226;GO:0043229;GO:0043231;GO:0098796;GO:0110165	5	2	2	34.2	11.9	11.9	22.055	0.001611	2.1959	386130	3	2	C6SVZ3;A0A0R0F2E8	C6SVZ3;A0A0R0F2E8	73	GLYMA_19G228800	KRG96730	KRG96730
19.9441	18.6665	16.5605	18.2729	18.609	16.1294	18.826	18.5094	18.5109	19.1477	16.5461	19.366				-1			carboxylic acid transmembrane transporter activity;fatty acid transmembrane transporter activity;lipid transporter activity;monocarboxylic acid transmembrane transporter activity;organic acid transmembrane transporter activity;organic anion transmembrane transporter activity;transmembrane transporter activity;transporter activity	cellular anatomical entity;membrane		cellular anatomical entity;membrane		Tmemb_14		Membrane;Referenceproteome;Transmembrane;Transmembranehelix			GO:0005215;GO:0005319;GO:0005342;GO:0008028;GO:0008514;GO:0015245;GO:0022857;GO:0046943	GO:0016020;GO:0110165		GO:0016020;GO:0110165	1	1	1	6.6	6.6	6.6	23.644	0	6.9495	4726400	2	3	A0A0R0F2K3;K7MTU2;I1L702;C6T7Q8;A0A0R0IKV3;K7MTU1	A0A0R0F2K3;K7MTU2;I1L702;C6T7Q8;A0A0R0IKV3;K7MTU1	74	GLYMA_09G274500;GLYMA_18G213500	KRH00438;KRH00439;KRH00440;KRH00441;KRH00442;KRH40727;KRH40728	KRH00438;KRH00439;KRH00440;KRH00441;KRH00442;KRH40727;KRH40728
15.6222	19.9047	18.5857	19.1433	19.1894	19.2862	19.009	17.2741	16.3022	19.4434	18.5547	18.5679				-1		cellular component organization;cellular component organization or biogenesis;cellular process;chromatin organization;chromatin remodeling;heterochromatin organization;protein-containing complex organization;protein-DNA complex organization	binding;chromatin binding;DNA binding;nucleic acid binding;organic cyclic compound binding;protein binding;protein dimerization activity;protein heterodimerization activity;protein-containing complex binding;structural constituent of chromatin;structural molecule activity	cellular anatomical entity;chromatin;heterochromatin;intracellular membrane-bounded organelle;intracellular organelle;membrane-bounded organelle;nucleosome;nucleus;organelle;protein-containing complex;protein-DNA complex	cellular component organization;cellular component organization or biogenesis;cellular process;chromatin organization	cellular anatomical entity;intracellular membrane-bounded organelle;intracellular organelle;nucleosome;nucleus;organelle;protein-containing complex;protein-DNA complex		Histone;Histone_H2A_C		Chromosome;DNA-binding;Nucleosomecore;Nucleus;Referenceproteome		GO:0006325;GO:0006338;GO:0009987;GO:0016043;GO:0043933;GO:0070828;GO:0071824;GO:0071840	GO:0003676;GO:0003677;GO:0003682;GO:0005198;GO:0005488;GO:0005515;GO:0030527;GO:0044877;GO:0046982;GO:0046983;GO:0097159	GO:0000785;GO:0000786;GO:0000792;GO:0005634;GO:0032991;GO:0032993;GO:0043226;GO:0043227;GO:0043229;GO:0043231;GO:0110165	GO:0006325;GO:0009987;GO:0016043;GO:0071840	GO:0000786;GO:0005634;GO:0032991;GO:0032993;GO:0043226;GO:0043229;GO:0043231;GO:0110165	3	2	2	27.1	22.2	22.2	15.463	0	5.2291	6182600	26	1	A0A0R0F3E0	A0A0R0F3E0	76	GLYMA_19G234100	KRG96819	KRG96819
16.1552	16.4381	16.0308	15.8846	16.0349	16.5058	15.6397	16.2205	16.6687	17.7593	16.2276	16.2489				-1			aminopeptidase activity;catalytic activity;catalytic activity, acting on a protein;exopeptidase activity;hydrolase activity;metalloaminopeptidase activity;metalloexopeptidase activity;metallopeptidase activity;peptidase activity	cellular anatomical entity		cellular anatomical entity		Creatinase_N;Creatinase_N_2;Peptidase_M24;Peptidase_M24_C		Referenceproteome			GO:0003824;GO:0004177;GO:0008233;GO:0008235;GO:0008237;GO:0008238;GO:0016787;GO:0070006;GO:0140096	GO:0110165		GO:0110165	1	1	1	2.6	2.6	2.6	70.866	0	11.358	830770	1	4	K7MZY2;A0A0R0F3E9	K7MZY2;A0A0R0F3E9	77	GLYMA_19G235100	KRG96830;KRG96831	KRG96830;KRG96831
16.4389	16.3545	16.565	16.7857	15.8483	16.0522	16.7382	15.5496	15.7116	15.2036	15.1474	16.3943				-1		cellular aromatic compound metabolic process;cellular metabolic process;cellular modified amino acid metabolic process;cellular process;folic acid-containing compound metabolic process;heterocycle metabolic process;metabolic process;nitrogen compound metabolic process;one-carbon metabolic process;organic cyclic compound metabolic process;organic substance metabolic process;organonitrogen compound…	catalytic activity;cyclohydrolase activity;hydrolase activity;hydrolase activity, acting on carbon-nitrogen (but not peptide) bonds;hydrolase activity, acting on carbon-nitrogen (but not peptide) bonds, in cyclic amidines;methenyltetrahydrofolate cyclohydrolase activity;methylenetetrahydrofolate dehydrogenase (NADP+) activity;methylenetetrahydrofolate dehydrogenase [NAD(P)+] activity;oxidoreducta…	cellular anatomical entity;cytosol	cellular aromatic compound metabolic process;cellular modified amino acid metabolic process;cellular process;heterocycle metabolic process;metabolic process;nitrogen compound metabolic process;one-carbon metabolic process;small molecule metabolic process	cellular anatomical entity;cytosol		THF_DHG_CYH;THF_DHG_CYH_C		Hydrolase;One-carbonmetabolism;Oxidoreductase;Referenceproteome		GO:0006575;GO:0006725;GO:0006730;GO:0006760;GO:0006807;GO:0008152;GO:0009987;GO:0035999;GO:0042558;GO:0044237;GO:0044281;GO:0046483;GO:0046653;GO:0071704;GO:1901360;GO:1901564	GO:0003824;GO:0004477;GO:0004486;GO:0004488;GO:0016491;GO:0016645;GO:0016646;GO:0016787;GO:0016810;GO:0016814;GO:0019238	GO:0005829;GO:0110165	GO:0006575;GO:0006725;GO:0006730;GO:0006807;GO:0008152;GO:0009987;GO:0044281;GO:0046483	GO:0005829;GO:0110165	1	1	1	5.7	5.7	5.7	32.304	0.0081937	1.6277	767420	9	1	A0A0R0FDY4;C6TGM7;A0A0R0F3H3;C6TNL4	A0A0R0FDY4;C6TGM7;A0A0R0F3H3;C6TNL4	78	GLYMA_09G262300;GLYMA_18G229900	KRH00698;KRH00699;KRH40497	KRH00698;KRH00699;KRH40497
19.3573	20.5456	20.2483	20.5996	19.968	20.1877	20.5393	19.1369	19.1392	19.9197	15.5929	19.6615				-1		carbohydrate metabolic process;metabolic process;organic substance metabolic process;primary metabolic process	catalytic activity;hydrolase activity;hydrolase activity, acting on glycosyl bonds;hydrolase activity, hydrolyzing O-glycosyl compounds;polygalacturonase activity		carbohydrate metabolic process;metabolic process;primary metabolic process			Glyco_hydro_28;Pectate_lyase_3		Cellwall;Glycosidase;Hydrolase;Referenceproteome;Secreted;Signal		GO:0005975;GO:0008152;GO:0044238;GO:0071704	GO:0003824;GO:0004553;GO:0004650;GO:0016787;GO:0016798		GO:0005975;GO:0008152;GO:0044238		1	1	1	2.9	2.9	2.9	53.225	0	30.048	10973000	22	1	I1L6G7;A0A0R0F3J1	I1L6G7;A0A0R0F3J1	79	GLYMA_09G256100;GLYMA_18G236700	KRH00832;KRH40394	KRH00832;KRH40394
16.8332	15.4938	14.8123	15.4663	14.7713	16.2918	17.2323	15.8476	15.6043	16.963	16.1672	16.2319				-1			binding;DNA binding;DNA secondary structure binding;minor groove of adenine-thymine-rich DNA binding;nucleic acid binding;organic cyclic compound binding	cellular anatomical entity;intracellular membrane-bounded organelle;intracellular organelle;membrane-bounded organelle;nucleus;organelle		cellular anatomical entity;intracellular membrane-bounded organelle;intracellular organelle;nucleus;organelle		PCC		DNA-binding;Nucleus;Referenceproteome;Transcription;Transcriptionregulation			GO:0000217;GO:0003676;GO:0003677;GO:0003680;GO:0005488;GO:0097159	GO:0005634;GO:0043226;GO:0043227;GO:0043229;GO:0043231;GO:0110165		GO:0005634;GO:0043226;GO:0043229;GO:0043231;GO:0110165	2	2	2	5.3	5.3	5.3	35.764	0	7.3309	778600	10	3	I1NCE4;A0A0R0KPL3;I1JRT7;A0A0R0KPH2;I1JRT6;A0A0R0F4F8;I1NCE3;I1NCE2	I1NCE4;A0A0R0KPL3;I1JRT7;A0A0R0KPH2;I1JRT6;A0A0R0F4F8;I1NCE3;I1NCE2	80	GLYMA_03G251800;GLYMA_19G249200	KRG97060;KRG97061;KRG97062;KRG97063;KRH68806;KRH68807;KRH68808;KRH68809	KRG97060;KRG97061;KRG97062;KRG97063;KRH68806;KRH68807;KRH68808;KRH68809
19.3585	18.9184	18.872	18.4476	18.3972	19.0731	18.2769	19.9765	19.9787	18.5993	18.244	19.2899				-1			binding;nucleic acid binding;organic cyclic compound binding					S1		Referenceproteome			GO:0003676;GO:0005488;GO:0097159				6	6	6	23.8	23.8	23.8	42.206	0	58.54	16567000	76	0	A0A0R0F511;A0A0R0ETX7;A0A0R0F2J3;I1LN48;A0A0R0HVK1;C6TC12	A0A0R0F511;A0A0R0ETX7;A0A0R0F2J3;I1LN48;A0A0R0HVK1	81	GLYMA_11G252900;GLYMA_18G004100	KRG97374;KRG97375;KRG97376;KRG97377;KRH31543;KRH31544	KRG97374;KRG97375;KRG97376;KRG97377;KRH31543;KRH31544
16.0889	17.467	17.5661	17.8108	17.5827	18.0661	17.3755	17.6518	17.2123	14.563	15.3975	17.4167				-1			catalytic activity;catalytic activity, acting on a protein;cis-trans isomerase activity;isomerase activity;peptidyl-prolyl cis-trans isomerase activity					FKBP_C		Isomerase;Referenceproteome;Rotamase			GO:0003755;GO:0003824;GO:0016853;GO:0016859;GO:0140096				2	2	1	14.4	14.4	10	24.874	0	6.737	2019900	40	1	I1N586;C6TLD4;A0A0R0F5J4	I1N586;C6TLD4;A0A0R0F5J4	82	GLYMA_18G292600	KRH01685;KRH01686;KRH01687	KRH01685;KRH01686;KRH01687
20.0994	19.6857	19.4502	19.5228	19.5318	19.709	19.5929	19.8968	19.899	20.2985	19.8272	19.7312				-1		amide biosynthetic process;amide metabolic process;biosynthetic process;carboxylic acid biosynthetic process;carboxylic acid metabolic process;cellular biosynthetic process;cellular lipid metabolic process;cellular metabolic process;cellular nitrogen compound biosynthetic process;cellular nitrogen compound metabolic process;cellular process;fatty acid biosynthetic process;fatty acid elongation;fa…	2,3-dihydro-2,3-dihydroxybenzoate dehydrogenase activity;3-oxoacyl-[acyl-carrier-protein] reductase (NADPH) activity;adenyl nucleotide binding;binding;catalytic activity;heterocyclic compound binding;NAD binding;nucleoside phosphate binding;nucleotide binding;organic cyclic compound binding;oxidoreductase activity;oxidoreductase activity, acting on CH-OH group of donors;oxidoreductase activity, a…	cellular anatomical entity;chloroplast;intracellular membrane-bounded organelle;intracellular organelle;membrane-bounded organelle;organelle;plastid	amide metabolic process;biosynthetic process;cellular lipid metabolic process;cellular nitrogen compound metabolic process;cellular process;lipid metabolic process;metabolic process;monocarboxylic acid metabolic process;nitrogen compound metabolic process;organic acid metabolic process;peptide metabolic process;primary metabolic process;secondary metabolic process;small molecule metabolic process	cellular anatomical entity;chloroplast;intracellular membrane-bounded organelle;intracellular organelle;organelle;plastid		adh_short;adh_short_C2		Fattyacidbiosynthesis;Fattyacidmetabolism;Lipidbiosynthesis;Lipidmetabolism;NADP;Oxidoreductase;Referenceproteome		GO:0006082;GO:0006518;GO:0006629;GO:0006631;GO:0006633;GO:0006807;GO:0008152;GO:0008610;GO:0009058;GO:0009237;GO:0009987;GO:0016053;GO:0019184;GO:0019290;GO:0019748;GO:0019752;GO:0030497;GO:0032787;GO:0034641;GO:0043043;GO:0043436;GO:0043603;GO:0043604;GO:0044237;GO:0044238;GO:0044249;GO:0044255;GO:0044271;GO:0044281;GO:0044283;GO:0044550;GO:0046394;GO:0071704;GO:0072330;GO:1901564;GO:1901566;GO:…	GO:0000166;GO:0003824;GO:0004316;GO:0005488;GO:0008667;GO:0016491;GO:0016614;GO:0016616;GO:0016627;GO:0016628;GO:0017076;GO:0030554;GO:0036094;GO:0051287;GO:0097159;GO:1901265;GO:1901363	GO:0009507;GO:0009536;GO:0043226;GO:0043227;GO:0043229;GO:0043231;GO:0110165	GO:0006082;GO:0006518;GO:0006629;GO:0006807;GO:0008152;GO:0009058;GO:0009987;GO:0019748;GO:0032787;GO:0034641;GO:0043603;GO:0044238;GO:0044255;GO:0044281	GO:0009507;GO:0009536;GO:0043226;GO:0043229;GO:0043231;GO:0110165	4	4	1	16.2	16.2	4.1	33.535	0	38.474	22906000	40	0	A0A0R0F5Q2;C6TA81;C6TH69;I1KRZ2	A0A0R0F5Q2;C6TA81	83	GLYMA_18G009200	KRG97459	KRG97459
17.0192	17.6361	16.886	16.784	16.8796	17.0603	17.1729	17.2061	15.9503	16.2178	15.6751	16.6039				-1		biological regulation;cellular localization;cellular macromolecule localization;cellular process;establishment of localization;establishment of protein localization;establishment of protein localization to extracellular region;exocytic process;export from cell;localization;macromolecule localization;membrane docking;nitrogen compound transport;organelle localization;organelle localization by memb…	anion binding;binding;carbohydrate derivative binding;catalytic activity;GTP binding;GTPase activity;guanyl nucleotide binding;guanyl ribonucleotide binding;heterocyclic compound binding;hydrolase activity;hydrolase activity, acting on acid anhydrides;hydrolase activity, acting on acid anhydrides, in phosphorus-containing anhydrides;ion binding;nucleoside phosphate binding;nucleotide binding;orga…	cellular anatomical entity;intracellular membrane-bounded organelle;intracellular organelle;membrane-bounded organelle;organelle	biological regulation;cellular localization;cellular process;establishment of localization;localization;macromolecule localization;membrane docking;organelle localization;organelle localization by membrane tethering;protein localization;protein transport;regulation of biological process;regulation of transport;secretion;transport	cellular anatomical entity;intracellular membrane-bounded organelle;intracellular organelle;organelle		Ras		Referenceproteome		GO:0006810;GO:0006904;GO:0008104;GO:0009306;GO:0009987;GO:0015031;GO:0017157;GO:0022406;GO:0032879;GO:0032940;GO:0033036;GO:0035592;GO:0045184;GO:0046903;GO:0048278;GO:0050789;GO:0050794;GO:0051046;GO:0051049;GO:0051179;GO:0051234;GO:0051640;GO:0051641;GO:0060627;GO:0065007;GO:0070727;GO:0071692;GO:0071702;GO:0071705;GO:0140029;GO:0140056;GO:0140352;GO:1903530	GO:0000166;GO:0003824;GO:0003924;GO:0005488;GO:0005525;GO:0016462;GO:0016787;GO:0016817;GO:0016818;GO:0017076;GO:0017111;GO:0019001;GO:0032553;GO:0032555;GO:0032561;GO:0035639;GO:0036094;GO:0043167;GO:0043168;GO:0097159;GO:0097367;GO:1901265;GO:1901363	GO:0043226;GO:0043227;GO:0043229;GO:0043231;GO:0110165	GO:0006810;GO:0008104;GO:0009987;GO:0015031;GO:0022406;GO:0033036;GO:0046903;GO:0050789;GO:0051049;GO:0051179;GO:0051234;GO:0051640;GO:0051641;GO:0065007;GO:0140056	GO:0043226;GO:0043229;GO:0043231;GO:0110165	3	1	1	17.1	6.5	6.5	23.903	0	25.953	1452100	13	1	I1LFC6;C6TBW7;C6SXA5;A0A0R0L273;A0A0R0F5U2;I1LK54;A0A0R0F5C8;C6TKN1;I1M4U0;I1MDH9	I1LFC6;C6TBW7;C6SXA5;A0A0R0L273;A0A0R0F5U2;I1LK54;A0A0R0F5C8;C6TKN1;I1M4U0;I1MDH9	84	GLYMA_02G094100;GLYMA_10G290000;GLYMA_11G142300;GLYMA_13G333500;GLYMA_15G040600;GLYMA_18G287600;GLYMA_20G099300	KRG90562;KRG90563;KRG90564;KRH01606;KRH01607;KRH10292;KRH10293;KRH23032;KRH29841;KRH36193;KRH70501	KRG90562;KRG90563;KRG90564;KRH01606;KRH01607;KRH10292;KRH10293;KRH23032;KRH29841;KRH36193;KRH70501
14.7652	16.2093	15.7134	15.5366	15.3235	16.0014	15.6219	14.9869	14.9889	14.7745	15.1862	15.6382				-1		abscisic acid-activated signaling pathway;biological regulation;cellular process;hormone-mediated signaling pathway;regulation of biological process;regulation of cellular process;signal transduction		cellular anatomical entity;intracellular membrane-bounded organelle;intracellular organelle;membrane;membrane-bounded organelle;nucleus;organelle;plasma membrane	biological regulation;cellular process;regulation of biological process;signal transduction	cellular anatomical entity;intracellular membrane-bounded organelle;intracellular organelle;membrane;nucleus;organelle;plasma membrane		C2		Abscisicacidsignalingpathway;Cellmembrane;Membrane;Nucleus;Referenceproteome		GO:0007165;GO:0009738;GO:0009755;GO:0009987;GO:0050789;GO:0050794;GO:0065007		GO:0005634;GO:0005886;GO:0016020;GO:0043226;GO:0043227;GO:0043229;GO:0043231;GO:0110165	GO:0007165;GO:0009987;GO:0050789;GO:0065007	GO:0005634;GO:0005886;GO:0016020;GO:0043226;GO:0043229;GO:0043231;GO:0110165	1	1	1	5.5	5.5	5.5	18.799	0.0038971	1.929	527020	16	0	C6SYG2;A0A0R0F5U7	C6SYG2;A0A0R0F5U7	85	GLYMA_11G216900;GLYMA_18G039700	KRG97928;KRH30951	KRG97928;KRH30951
21.0438	19.5332	19.9356	18.7523	19.526	20.0471	19.4841	21.3563	21.3586	21.1748	21.3429	20.6113				-1		biosynthetic process;carbohydrate biosynthetic process;carbohydrate metabolic process;cellular biosynthetic process;cellular metabolic process;cellular process;energy derivation by oxidation of organic compounds;energy reserve metabolic process;generation of precursor metabolites and energy;glucan biosynthetic process;glucan metabolic process;glycogen biosynthetic process;glycogen metabolic proce…	adenyl nucleotide binding;adenyl ribonucleotide binding;adenylyltransferase activity;anion binding;ATP binding;binding;carbohydrate derivative binding;catalytic activity;glucose-1-phosphate adenylyltransferase activity;heterocyclic compound binding;ion binding;nucleoside phosphate binding;nucleotide binding;nucleotidyltransferase activity;organic cyclic compound binding;purine nucleotide binding;…	cellular anatomical entity;chloroplast;intracellular membrane-bounded organelle;intracellular organelle;membrane-bounded organelle;organelle;plastid	biosynthetic process;carbohydrate metabolic process;cellular process;energy reserve metabolic process;generation of precursor metabolites and energy;macromolecule biosynthetic process;macromolecule metabolic process;metabolic process;polysaccharide metabolic process;primary metabolic process	cellular anatomical entity;chloroplast;intracellular membrane-bounded organelle;intracellular organelle;organelle;plastid		NTP_transferase		ATP-binding;Chloroplast;Nucleotide-binding;Nucleotidyltransferase;Plastid;Referenceproteome;Starchbiosynthesis;Transferase		GO:0000271;GO:0005975;GO:0005976;GO:0005977;GO:0005978;GO:0005982;GO:0006091;GO:0006112;GO:0008152;GO:0009058;GO:0009059;GO:0009250;GO:0009987;GO:0015980;GO:0016051;GO:0019252;GO:0043170;GO:0044042;GO:0044237;GO:0044238;GO:0044249;GO:0071704;GO:1901576	GO:0000166;GO:0003824;GO:0005488;GO:0005524;GO:0008878;GO:0016740;GO:0016772;GO:0016779;GO:0017076;GO:0030554;GO:0032553;GO:0032555;GO:0032559;GO:0035639;GO:0036094;GO:0043167;GO:0043168;GO:0070566;GO:0097159;GO:0097367;GO:1901265;GO:1901363	GO:0009507;GO:0009536;GO:0043226;GO:0043227;GO:0043229;GO:0043231;GO:0110165	GO:0005975;GO:0005976;GO:0006091;GO:0006112;GO:0008152;GO:0009058;GO:0009059;GO:0009987;GO:0043170;GO:0044238	GO:0009507;GO:0009536;GO:0043226;GO:0043229;GO:0043231;GO:0110165	16	16	16	38.8	38.8	38.8	58.147	0	175.23	112320000	109	0	A0A0R0F6M9;A0A0R0JFK5;C6TE56;I1KNB0;A0A0R0J8G8;A0A0R0J8G9	A0A0R0F6M9;A0A0R0JFK5;C6TE56;I1KNB0;A0A0R0J8G8;A0A0R0J8G9	86	GLYMA_07G258500;GLYMA_17G015600	KRH02097;KRH51050;KRH51051;KRH51052;KRH51053;KRH51054	KRH02097;KRH51050;KRH51051;KRH51052;KRH51053;KRH51054
26.1578	25.0248	25.1218	24.7277	25.2328	25.2735	25.229	26.2889	26.3116	25.8858	26.1097	25.8476				-1			adenyl nucleotide binding;adenyl ribonucleotide binding;anion binding;ATP binding;ATP hydrolysis activity;binding;carbohydrate derivative binding;catalytic activity;enzyme activator activity;enzyme regulator activity;heterocyclic compound binding;hydrolase activity;hydrolase activity, acting on acid anhydrides;hydrolase activity, acting on acid anhydrides, in phosphorus-containing anhydrides;ion …	cellular anatomical entity;chloroplast stroma;plastid stroma		cellular anatomical entity		AAA		ATP-binding;Chloroplast;Nucleotide-binding;Plastid;Referenceproteome			GO:0000166;GO:0003824;GO:0005488;GO:0005524;GO:0008047;GO:0016462;GO:0016787;GO:0016817;GO:0016818;GO:0016887;GO:0017076;GO:0017111;GO:0030234;GO:0030554;GO:0032553;GO:0032555;GO:0032559;GO:0035639;GO:0036094;GO:0043167;GO:0043168;GO:0046863;GO:0097159;GO:0097367;GO:0098772;GO:0140677;GO:1901265;GO:1901363	GO:0009532;GO:0009570;GO:0110165		GO:0110165	26	26	6	70.1	70.1	16.1	48.894	0	323.31	4421500000	1641	0	A0A0R0F761;C6T859	A0A0R0F761;C6T859	87	GLYMA_18G036400	KRG97873;KRG97874;KRG97875	KRG97873;KRG97874;KRG97875
21.3667	20.0837	20.4756	19.6299	20.0105	20.4179	19.9183	20.8757	20.8778	20.5461	19.9444	20.4988				-1			catalytic activity;oxidoreductase activity;oxidoreductase activity, acting on CH-OH group of donors;oxidoreductase activity, acting on the CH-OH group of donors, NAD or NADP as acceptor					Epimerase		Referenceproteome			GO:0003824;GO:0016491;GO:0016614;GO:0016616				16	4	4	55.1	15	15	35.179	0	65.689	43600000	93	0	B0LVF3;A0A0R0F859;K7MQ59;K7MQ62;C6TMC3;K7M834;A0A0R0LA35;I1MBF1	B0LVF3;A0A0R0F859;K7MQ59;K7MQ62;C6TMC3	88	GLYMA_18G057900	KRG98212;KRG98213;KRG98214;KRG98215;KRG98216	KRG98212;KRG98213;KRG98214;KRG98215;KRG98216
21.5107	21.9107	21.6252	21.8627	21.2803	21.7988	22.0937	21.8304	21.8327	21.5096	21.3783	21.8676				-1		macromolecule metabolic process;metabolic process;nitrogen compound metabolic process;organic substance metabolic process;organonitrogen compound metabolic process;primary metabolic process;protein metabolic process;proteolysis	catalytic activity;catalytic activity, acting on a protein;hydrolase activity;peptidase activity;serine hydrolase activity;serine-type peptidase activity		macromolecule metabolic process;metabolic process;nitrogen compound metabolic process;primary metabolic process;protein metabolic process;proteolysis			Peptidase_S9		Referenceproteome		GO:0006508;GO:0006807;GO:0008152;GO:0019538;GO:0043170;GO:0044238;GO:0071704;GO:1901564	GO:0003824;GO:0008233;GO:0008236;GO:0016787;GO:0017171;GO:0140096		GO:0006508;GO:0006807;GO:0008152;GO:0019538;GO:0043170;GO:0044238		13	13	11	26.1	26.1	21.2	75.408	0	81.194	118340000	149	0	K7MQY6;A0A0R0F877;K7MQY8	K7MQY6;A0A0R0F877;K7MQY8	89	GLYMA_18G098400	KRG98791;KRG98792;KRG98793;KRG98794;KRG98795	KRG98791;KRG98792;KRG98793;KRG98794;KRG98795
20.9428	21.29	21.1896	21.3231	21.0456	21.5655	21.4824	21.0516	21.0586	21.4673	21.1425	21.0305				-1		carbohydrate metabolic process;D-xylose metabolic process;metabolic process;monosaccharide metabolic process;organic substance metabolic process;pentose metabolic process;primary metabolic process;small molecule metabolic process	binding;catalytic activity;cation binding;intramolecular oxidoreductase activity;intramolecular oxidoreductase activity, interconverting aldoses and ketoses;ion binding;isomerase activity;metal ion binding;xylose isomerase activity		carbohydrate metabolic process;metabolic process;primary metabolic process;small molecule metabolic process			AP_endonuc_2		Carbohydratemetabolism;Isomerase;Metal-binding;Referenceproteome;Signal;Xylosemetabolism		GO:0005975;GO:0005996;GO:0008152;GO:0019321;GO:0042732;GO:0044238;GO:0044281;GO:0071704	GO:0003824;GO:0005488;GO:0009045;GO:0016853;GO:0016860;GO:0016861;GO:0043167;GO:0043169;GO:0046872		GO:0005975;GO:0008152;GO:0044238;GO:0044281		11	11	11	30.6	30.6	30.6	54.209	0	65.286	88755000	154	0	I1MSU1;A0A0R0F8Z5;C6T8U9	I1MSU1;A0A0R0F8Z5	91	GLYMA_17G066200	KRH02908;KRH02909;KRH02910;KRH02911;KRH02912	KRH02908;KRH02909;KRH02910;KRH02911;KRH02912
19.7983	19.1609	19.2604	19.2631	19.434	19.4064	19.2286	20.2048	20.2071	19.4346	20.0946	19.9078				-1		aromatic compound biosynthetic process;biosynthetic process;cellular aromatic compound metabolic process;cellular biosynthetic process;cellular metabolic process;cellular nitrogen compound biosynthetic process;cellular nitrogen compound metabolic process;cellular process;chlorophyll biosynthetic process;chlorophyll metabolic process;heterocycle biosynthetic process;heterocycle metabolic process;m…	catalytic activity;geranylgeranyl diphosphate reductase activity;geranylgeranyl reductase activity;oxidoreductase activity;oxidoreductase activity, acting on the CH-CH group of donors;oxidoreductase activity, acting on the CH-CH group of donors, NAD or NADP as acceptor		biosynthetic process;cellular aromatic compound metabolic process;cellular nitrogen compound metabolic process;cellular process;heterocycle metabolic process;metabolic process;nitrogen compound metabolic process;photosynthesis;pigment metabolic process;tetrapyrrole metabolic process			Pyr_redox_2	ACEVEDO_LIVER_CANCER_UP;ALONSO_METASTASIS_UP;BENPORATH_MYC_MAX_TARGETS;BOYAULT_LIVER_CANCER_SUBCLASS_G6_UP;BOYLAN_MULTIPLE_MYELOMA_C_D_DN;BROWNE_HCMV_INFECTION_48HR_UP;BYSTRYKH_HEMATOPOIESIS_STEM_CELL_QTL_CIS;CAVARD_LIVER_CANCER_MALIGNANT_VS_BENIGN;CROONQUIST_IL6_DEPRIVATION_DN;DESERT_PERIVENOUS_HEPATOCELLULAR_CARCINOMA_SUBCLASS_UP;DIAZ_CHRONIC_MYELOGENOUS_LEUKEMIA_UP;DUTERTRE_ESTRADIOL_RESPONSE_…	Chlorophyllbiosynthesis;NADP;Photosynthesis;Referenceproteome		GO:0006725;GO:0006778;GO:0006779;GO:0006807;GO:0008152;GO:0009058;GO:0009987;GO:0015979;GO:0015994;GO:0015995;GO:0018130;GO:0019438;GO:0033013;GO:0033014;GO:0034641;GO:0042440;GO:0044237;GO:0044249;GO:0044271;GO:0046148;GO:0046483;GO:0071704;GO:1901360;GO:1901362;GO:1901564;GO:1901566;GO:1901576	GO:0003824;GO:0016491;GO:0016627;GO:0016628;GO:0045550;GO:0102067		GO:0006725;GO:0006807;GO:0008152;GO:0009058;GO:0009987;GO:0015979;GO:0033013;GO:0034641;GO:0042440;GO:0046483		3	3	3	9.1	9.1	9.1	51.328	0	23.899	16960000	29	0	Q9XE94;A0A0R4J365;A0A0R0FAD6;K7KB36	Q9XE94;A0A0R4J365;A0A0R0FAD6	92	GLYMA_05G026200;GLYMA_17G100700	KRH03484;KRH56906	KRH03484;KRH56906
19.6758	19.9599	19.5429	19.6263	19.3757	19.4618	16.8494	19.9845	19.9869	20.1668	17.8571	19.4842				-1		macromolecule metabolic process;metabolic process;nitrogen compound metabolic process;organic substance metabolic process;organonitrogen compound metabolic process;primary metabolic process;protein metabolic process;protein quality control for misfolded or incompletely synthesized proteins;proteolysis;proteolysis involved in protein catabolic process	ATP-dependent activity;ATP-dependent peptidase activity;ATPase binding;binding;catalytic activity;catalytic activity, acting on a protein;endopeptidase activity;enzyme binding;hydrolase activity;peptidase activity;protein binding;serine hydrolase activity;serine-type endopeptidase activity;serine-type peptidase activity	catalytic complex;cellular anatomical entity;endopeptidase Clp complex;plastid stroma;protein-containing complex	macromolecule metabolic process;metabolic process;nitrogen compound metabolic process;primary metabolic process;protein metabolic process;proteolysis;proteolysis involved in protein catabolic process	catalytic complex;cellular anatomical entity;endopeptidase Clp complex;protein-containing complex		CLP_protease		Referenceproteome		GO:0006508;GO:0006515;GO:0006807;GO:0008152;GO:0019538;GO:0043170;GO:0044238;GO:0051603;GO:0071704;GO:1901564	GO:0003824;GO:0004175;GO:0004176;GO:0004252;GO:0005488;GO:0005515;GO:0008233;GO:0008236;GO:0016787;GO:0017171;GO:0019899;GO:0051117;GO:0140096;GO:0140657	GO:0009368;GO:0009532;GO:0032991;GO:0110165;GO:1902494	GO:0006508;GO:0006807;GO:0008152;GO:0019538;GO:0043170;GO:0044238;GO:0051603	GO:0009368;GO:0032991;GO:0110165;GO:1902494	2	2	2	8.3	8.3	8.3	34.54	0	18.127	11523000	27	1	I1K0I6;A0A0R0FC89	I1K0I6;A0A0R0FC89	93	GLYMA_05G053600;GLYMA_17G136100	KRH04045;KRH57313	KRH04045;KRH57313
21.3563	20.7416	21.2705	20.4827	21.2145	20.6856	21.0098	21.5619	21.5642	21.6798	21.0085	21.2334				-1			binding;catalytic activity;cation binding;hydrolase activity;hydrolase activity, acting on ester bonds;ion binding;metal ion binding;phosphatase activity;phosphoglycolate phosphatase activity;phosphoric ester hydrolase activity					Hydrolase_6;Hydrolase_like		Hydrolase;Magnesium;Metal-binding;Referenceproteome			GO:0003824;GO:0005488;GO:0008967;GO:0016787;GO:0016788;GO:0016791;GO:0042578;GO:0043167;GO:0043169;GO:0046872				13	1	1	60.6	4.7	4.7	30.568	0.00041876	2.5143	36757000	15	0	A0A0R0FCD1;K7MUH9;A0A0R0FCP7;I1N415;A0A0R0FFP1	A0A0R0FCD1;K7MUH9;A0A0R0FCP7;I1N415;A0A0R0FFP1	94	GLYMA_18G244900	KRH00960;KRH00961;KRH00962;KRH00963;KRH00964	KRH00960;KRH00961;KRH00962;KRH00963;KRH00964
20.8611	19.0843	20.3742	19.5398	20.2951	20.1015	18.6374	20.8538	20.856	21.1094	21.7324	20.7979				-1		cellular component assembly;cellular component organization;cellular component organization or biogenesis;cellular process;protein-containing complex assembly;protein-containing complex organization;SNARE complex assembly	binding;protein binding;SNARE binding	cellular anatomical entity;cytoplasmic vesicle;endosome;intracellular membrane-bounded organelle;intracellular organelle;intracellular vesicle;lytic vacuole;membrane;membrane-bounded organelle;organelle;vacuole;vesicle	cellular component assembly;cellular component organization;cellular component organization or biogenesis;cellular process;protein-containing complex assembly	cellular anatomical entity;cytoplasmic vesicle;endosome;intracellular membrane-bounded organelle;intracellular organelle;membrane;organelle;vacuole;vesicle				Membrane;Referenceproteome;Transmembrane;Transmembranehelix		GO:0009987;GO:0016043;GO:0022607;GO:0035493;GO:0043933;GO:0065003;GO:0071840	GO:0000149;GO:0005488;GO:0005515	GO:0000323;GO:0005768;GO:0005773;GO:0016020;GO:0031410;GO:0031982;GO:0043226;GO:0043227;GO:0043229;GO:0043231;GO:0097708;GO:0110165	GO:0009987;GO:0016043;GO:0022607;GO:0065003;GO:0071840	GO:0005768;GO:0005773;GO:0016020;GO:0031410;GO:0031982;GO:0043226;GO:0043229;GO:0043231;GO:0110165	7	7	6	25	25	22.4	30.491	0	23.344	42931000	63	0	C6TCY7;A0A0R0FCW9;A0A0R0F3Q5;A0A0R0FDI4;A0A0R0IDJ1	C6TCY7;A0A0R0FCW9;A0A0R0F3Q5;A0A0R0FDI4	95	GLYMA_18G234300	KRH00792;KRH00793;KRH00794	KRH00792;KRH00793;KRH00794
19.9884	19.7342	19.6195	20.0886	20.0595	19.7237	20.0366	19.7241	19.6667	19.9267	19.5149	19.6898				-1		aromatic compound biosynthetic process;biosynthetic process;carbohydrate derivative biosynthetic process;carbohydrate derivative metabolic process;carbohydrate metabolic process;cellular aromatic compound metabolic process;cellular biosynthetic process;cellular metabolic process;cellular nitrogen compound biosynthetic process;cellular nitrogen compound metabolic process;cellular process;GDP-manno…	binding;catalytic activity;cation binding;intramolecular phosphotransferase activity;intramolecular transferase activity;ion binding;isomerase activity;metal ion binding;phosphomannomutase activity	cellular anatomical entity;cytoplasm;cytosol	biosynthetic process;carbohydrate derivative metabolic process;carbohydrate metabolic process;cellular aromatic compound metabolic process;cellular nitrogen compound metabolic process;cellular process;heterocycle metabolic process;macromolecule metabolic process;macromolecule modification;metabolic process;nitrogen compound metabolic process;nucleobase-containing compound metabolic process;nucleo…	cellular anatomical entity;cytoplasm;cytosol		PMM		Cytoplasm;Isomerase;Magnesium;Metal-binding;Referenceproteome		GO:0005975;GO:0005996;GO:0006013;GO:0006139;GO:0006486;GO:0006487;GO:0006725;GO:0006807;GO:0008152;GO:0009058;GO:0009225;GO:0009226;GO:0009298;GO:0009987;GO:0018130;GO:0019318;GO:0019438;GO:0019538;GO:0019673;GO:0034641;GO:0034654;GO:0036211;GO:0043170;GO:0043412;GO:0043413;GO:0044237;GO:0044238;GO:0044249;GO:0044271;GO:0044281;GO:0046483;GO:0055086;GO:0070085;GO:0071704;GO:1901135;GO:1901137;GO:…	GO:0003824;GO:0004615;GO:0005488;GO:0016853;GO:0016866;GO:0016868;GO:0043167;GO:0043169;GO:0046872	GO:0005737;GO:0005829;GO:0110165	GO:0005975;GO:0006139;GO:0006486;GO:0006725;GO:0006807;GO:0008152;GO:0009058;GO:0009225;GO:0009987;GO:0019538;GO:0034641;GO:0036211;GO:0043170;GO:0043412;GO:0044238;GO:0044281;GO:0046483;GO:0055086;GO:1901135	GO:0005737;GO:0005829;GO:0110165	9	9	1	44.5	44.5	5.7	28.019	0	43.712	47766000	98	0	A0A0R0FD94;Q1W376;C6SZ36	A0A0R0FD94;Q1W376;C6SZ36	96	GLYMA_18G229800	KRH00697	KRH00697
19.9525	19.6211	19.727	19.7214	18.6588	19.818	19.5361	19.1166	19.1189	19.8565	14.8006	19.3419				-1		macromolecule metabolic process;metabolic process;nitrogen compound metabolic process;organic substance metabolic process;organonitrogen compound metabolic process;primary metabolic process;protein metabolic process;proteolysis	catalytic activity;catalytic activity, acting on a protein;dipeptidyl-peptidase activity;exopeptidase activity;hydrolase activity;peptidase activity;serine hydrolase activity;serine-type peptidase activity	cellular anatomical entity;membrane	macromolecule metabolic process;metabolic process;nitrogen compound metabolic process;primary metabolic process;protein metabolic process;proteolysis	cellular anatomical entity;membrane		Peptidase_S28		Hydrolase;Membrane;Referenceproteome;Transmembrane;Transmembranehelix		GO:0006508;GO:0006807;GO:0008152;GO:0019538;GO:0043170;GO:0044238;GO:0071704;GO:1901564	GO:0003824;GO:0008233;GO:0008236;GO:0008238;GO:0008239;GO:0016787;GO:0017171;GO:0140096	GO:0016020;GO:0110165	GO:0006508;GO:0006807;GO:0008152;GO:0019538;GO:0043170;GO:0044238	GO:0016020;GO:0110165	2	2	2	6.6	6.6	6.6	48.981	0	6.4428	9133700	19	1	A0A0R0FDK6;I1MVH2	A0A0R0FDK6;I1MVH2	97	GLYMA_17G157700	KRH04367;KRH04368;KRH04369	KRH04367;KRH04368;KRH04369
20.9277	20.8635	20.9076	20.707	20.5861	20.708	20.8929	20.9415	20.9437	20.1956	20.7879	20.7795				-1		carbohydrate derivative metabolic process;cell wall biogenesis;cell wall organization;cell wall organization or biogenesis;cellular aromatic compound metabolic process;cellular component biogenesis;cellular component organization;cellular component organization or biogenesis;cellular metabolic process;cellular nitrogen compound metabolic process;cellular process;external encapsulating structure o…	catalytic activity;intramolecular transferase activity;isomerase activity;UDP-arabinopyranose mutase activity	cellular anatomical entity;cytosol;Golgi apparatus;intracellular membrane-bounded organelle;intracellular organelle;membrane-bounded organelle;organelle	carbohydrate derivative metabolic process;cell wall organization;cell wall organization or biogenesis;cellular aromatic compound metabolic process;cellular component biogenesis;cellular component organization;cellular component organization or biogenesis;cellular nitrogen compound metabolic process;cellular process;external encapsulating structure organization;heterocycle metabolic process;metabo…	cellular anatomical entity;cytosol;Golgi apparatus;intracellular membrane-bounded organelle;intracellular organelle;organelle		RGP		Cellwallbiogenesis/degradation;Glycoprotein;Golgiapparatus;Isomerase;Referenceproteome		GO:0006139;GO:0006725;GO:0006793;GO:0006807;GO:0008152;GO:0009225;GO:0009832;GO:0009987;GO:0016043;GO:0033356;GO:0034641;GO:0042546;GO:0044085;GO:0044237;GO:0044238;GO:0044281;GO:0045229;GO:0046483;GO:0055086;GO:0071554;GO:0071555;GO:0071669;GO:0071704;GO:0071840;GO:1901135;GO:1901360	GO:0003824;GO:0016853;GO:0016866;GO:0052691	GO:0005794;GO:0005829;GO:0043226;GO:0043227;GO:0043229;GO:0043231;GO:0110165	GO:0006139;GO:0006725;GO:0006793;GO:0006807;GO:0008152;GO:0009225;GO:0009987;GO:0016043;GO:0034641;GO:0044085;GO:0044238;GO:0044281;GO:0045229;GO:0046483;GO:0055086;GO:0071554;GO:0071555;GO:0071840;GO:1901135	GO:0005794;GO:0005829;GO:0043226;GO:0043229;GO:0043231;GO:0110165	12	8	0	42.5	33.1	0	40.111	0	50.462	84378000	204	0	A0A0R0FDT6;C6TNP5	A0A0R0FDT6;C6TNP5	98	GLYMA_18G272200	KRH01363	KRH01363
20.694	21.0639	20.93	21.0372	21.4742	21.3282	21.6601	20.771	20.7733	20.897	21.4633	20.493				-1		biological regulation;regulation of biological process;regulation of cellular metabolic process;regulation of cellular process;regulation of macromolecule metabolic process;regulation of metabolic process;regulation of nitrogen compound metabolic process;regulation of nucleobase-containing compound metabolic process;regulation of primary metabolic process;regulation of RNA metabolic process	4-hydroxy-4-methyl-2-oxoglutarate aldolase activity;binding;carbon-carbon lyase activity;carboxy-lyase activity;catalytic activity;cation binding;enzyme inhibitor activity;enzyme regulator activity;ion binding;lyase activity;metal ion binding;molecular function inhibitor activity;molecular function regulator activity;nuclease inhibitor activity;oxaloacetate decarboxylase activity;oxo-acid-lyase a…		biological regulation;regulation of biological process;regulation of metabolic process			RraA-like		Lyase;Metal-binding;Referenceproteome		GO:0019219;GO:0019222;GO:0031323;GO:0050789;GO:0050794;GO:0051171;GO:0051252;GO:0060255;GO:0065007;GO:0080090	GO:0003824;GO:0004857;GO:0005488;GO:0008428;GO:0008948;GO:0016829;GO:0016830;GO:0016831;GO:0016833;GO:0030234;GO:0043167;GO:0043169;GO:0046872;GO:0047443;GO:0098772;GO:0140678;GO:0140721		GO:0019222;GO:0050789;GO:0065007		7	7	6	57.4	57.4	51.4	15.798	0	16.578	55236000	58	0	C6TFT6;A0A0R0ID57;A0A0R0FDV1;C6T2H9	C6TFT6;A0A0R0ID57;A0A0R0FDV1;C6T2H9	99	GLYMA_09G250300;GLYMA_18G242200	KRH00921;KRH40302	KRH00921;KRH40302
21.3894	20.4213	15.865	20.3423	20.1882	20.2221	19.9989	19.7016	19.7039	20.9949	20.295	20.1452				-1		amide biosynthetic process;amide metabolic process;biosynthetic process;cellular biosynthetic process;cellular metabolic process;cellular nitrogen compound biosynthetic process;cellular nitrogen compound metabolic process;cellular process;macromolecule biosynthetic process;macromolecule metabolic process;metabolic process;nitrogen compound metabolic process;organic substance biosynthetic process;…	binding;mRNA binding;nucleic acid binding;organic cyclic compound binding;RNA binding;structural constituent of ribosome;structural molecule activity	cellular anatomical entity;cytosolic small ribosomal subunit;intracellular non-membrane-bounded organelle;intracellular organelle;non-membrane-bounded organelle;organelle;protein-containing complex;ribonucleoprotein complex;ribosomal subunit;ribosome;small ribosomal subunit	amide metabolic process;biosynthetic process;cellular nitrogen compound metabolic process;cellular process;macromolecule biosynthetic process;macromolecule metabolic process;metabolic process;nitrogen compound metabolic process;peptide metabolic process;primary metabolic process;protein metabolic process;translation	cellular anatomical entity;intracellular non-membrane-bounded organelle;intracellular organelle;non-membrane-bounded organelle;organelle;protein-containing complex;ribonucleoprotein complex;ribosome;small ribosomal subunit		Ribosomal_S26e		Referenceproteome;Ribonucleoprotein;Ribosomalprotein		GO:0006412;GO:0006518;GO:0006807;GO:0008152;GO:0009058;GO:0009059;GO:0009987;GO:0019538;GO:0034641;GO:0043043;GO:0043170;GO:0043603;GO:0043604;GO:0044237;GO:0044238;GO:0044249;GO:0044271;GO:0071704;GO:1901564;GO:1901566;GO:1901576	GO:0003676;GO:0003723;GO:0003729;GO:0003735;GO:0005198;GO:0005488;GO:0097159	GO:0005840;GO:0015935;GO:0022627;GO:0032991;GO:0043226;GO:0043228;GO:0043229;GO:0043232;GO:0044391;GO:0110165;GO:1990904	GO:0006412;GO:0006518;GO:0006807;GO:0008152;GO:0009058;GO:0009059;GO:0009987;GO:0019538;GO:0034641;GO:0043170;GO:0043603;GO:0044238	GO:0005840;GO:0015935;GO:0032991;GO:0043226;GO:0043228;GO:0043229;GO:0043232;GO:0110165;GO:1990904	2	2	2	18.6	18.6	18.6	14.85	0	6.4408	16421000	28	1	C6TAV9;C6SXR4;A0A0R4J3A8;A0A0R0KHW0;A0A0R0FE22;C6SXI6;C6SWA5;A0A0R0FYN8;C6T4K2	C6TAV9;C6SXR4;A0A0R4J3A8;A0A0R0KHW0;A0A0R0FE22;C6SXI6;C6SWA5;A0A0R0FYN8;C6T4K2	100	GLYMA_02G239700;GLYMA_04G221400;GLYMA_05G099500;GLYMA_06G144400;GLYMA_14G208600;GLYMA_16G055600;GLYMA_17G166400	KRH04512;KRH06932;KRH17252;KRH53763;KRH57998;KRH64187;KRH72901	KRH04512;KRH06932;KRH17252;KRH53763;KRH57998;KRH64187;KRH72901
18.8682	20.3372	20.054	20.3606	19.9815	19.9316	20.7957	18.9483	19.0077	19.0415	19.888	19.3032				-1		carbohydrate metabolic process;metabolic process;organic substance metabolic process;primary metabolic process	beta-glucosidase activity;catalytic activity;glucan endo-1,3-beta-D-glucosidase activity;glucosidase activity;hydrolase activity;hydrolase activity, acting on glycosyl bonds;hydrolase activity, hydrolyzing O-glycosyl compounds		carbohydrate metabolic process;metabolic process;primary metabolic process			Glyco_hydro_17;X8		Glycosidase;Hydrolase;Referenceproteome;Signal		GO:0005975;GO:0008152;GO:0044238;GO:0071704	GO:0003824;GO:0004553;GO:0008422;GO:0015926;GO:0016787;GO:0016798;GO:0042973		GO:0005975;GO:0008152;GO:0044238		4	4	4	18.6	18.6	18.6	39.837	0	11.718	17578000	32	0	K7MVE6;A0A0R0FEM3;K7MVE5	K7MVE6;A0A0R0FEM3;K7MVE5	101	GLYMA_18G291500	KRH01667;KRH01668;KRH01669	KRH01667;KRH01668;KRH01669
16.1837	20.1406	19.2681	19.798	15.6276	17.5755	19.9613	18.6157	18.6179	16.3198	16.6357	16.3666				-1		amide biosynthetic process;amide metabolic process;biosynthetic process;cellular biosynthetic process;cellular metabolic process;cellular nitrogen compound biosynthetic process;cellular nitrogen compound metabolic process;cellular process;macromolecule biosynthetic process;macromolecule metabolic process;metabolic process;nitrogen compound metabolic process;organic substance biosynthetic process;…	anion binding;binding;carbohydrate derivative binding;catalytic activity;GTP binding;GTPase activity;guanyl nucleotide binding;guanyl ribonucleotide binding;heterocyclic compound binding;hydrolase activity;hydrolase activity, acting on acid anhydrides;hydrolase activity, acting on acid anhydrides, in phosphorus-containing anhydrides;ion binding;nucleic acid binding;nucleoside phosphate binding;nu…	cellular anatomical entity;cytoplasm	amide metabolic process;biosynthetic process;cellular nitrogen compound metabolic process;cellular process;macromolecule biosynthetic process;macromolecule metabolic process;metabolic process;nitrogen compound metabolic process;peptide metabolic process;primary metabolic process;protein metabolic process;translation;translational elongation	cellular anatomical entity;cytoplasm		GTP_EFTU;GTP_EFTU_D2;GTP_EFTU_D3		Cytoplasm;Elongationfactor;GTP-binding;Methylation;Nucleotide-binding;Phosphoprotein;Proteinbiosynthesis;Referenceproteome		GO:0006412;GO:0006414;GO:0006518;GO:0006807;GO:0008152;GO:0009058;GO:0009059;GO:0009987;GO:0019538;GO:0034641;GO:0043043;GO:0043170;GO:0043603;GO:0043604;GO:0044237;GO:0044238;GO:0044249;GO:0044271;GO:0071704;GO:1901564;GO:1901566;GO:1901576	GO:0000166;GO:0003676;GO:0003746;GO:0003824;GO:0003924;GO:0005488;GO:0005525;GO:0008135;GO:0016462;GO:0016787;GO:0016817;GO:0016818;GO:0017076;GO:0017111;GO:0019001;GO:0032553;GO:0032555;GO:0032561;GO:0035639;GO:0036094;GO:0043167;GO:0043168;GO:0045182;GO:0090079;GO:0097159;GO:0097367;GO:1901265;GO:1901363	GO:0005737;GO:0110165	GO:0006412;GO:0006414;GO:0006518;GO:0006807;GO:0008152;GO:0009058;GO:0009059;GO:0009987;GO:0019538;GO:0034641;GO:0043170;GO:0043603;GO:0044238	GO:0005737;GO:0110165	13	3	3	40.7	9.6	9.6	49.377	0	6.9767	7856000	15	4	P25698;C6EVF9;A0A0R0FER5;A0A0R4J384;Q6DNI3	P25698;C6EVF9;A0A0R0FER5;A0A0R4J384	102	GLYMA_05G089000;GLYMA_17G186600	KRH04781;KRH57863;KRH57864	KRH04781;KRH57863;KRH57864
20.1556	21.3201	20.6826	21.7317	21.3529	21.0699	21.1567	22.1626	22.1648	20.5214	18.9775	20.9363				-1		macromolecule metabolic process;metabolic process;nitrogen compound metabolic process;organic substance metabolic process;organonitrogen compound metabolic process;primary metabolic process;protein metabolic process;proteolysis	catalytic activity;catalytic activity, acting on a protein;endopeptidase activity;hydrolase activity;peptidase activity;serine hydrolase activity;serine-type endopeptidase activity;serine-type peptidase activity	cellular anatomical entity;extracellular region	macromolecule metabolic process;metabolic process;nitrogen compound metabolic process;primary metabolic process;protein metabolic process;proteolysis	cellular anatomical entity;extracellular region		fn3_6;Inhibitor_I9;Peptidase_S8		Hydrolase;Protease;Referenceproteome;Secreted;Serineprotease		GO:0006508;GO:0006807;GO:0008152;GO:0019538;GO:0043170;GO:0044238;GO:0071704;GO:1901564	GO:0003824;GO:0004175;GO:0004252;GO:0008233;GO:0008236;GO:0016787;GO:0017171;GO:0140096	GO:0005576;GO:0110165	GO:0006508;GO:0006807;GO:0008152;GO:0019538;GO:0043170;GO:0044238	GO:0005576;GO:0110165	8	5	5	18	13.8	13.8	85.803	0	46.654	54497000	120	0	A0A0R0FFE9;I1L635;I1L634	A0A0R0FFE9	105	GLYMA_18G249800	KRH01039	KRH01039
19.1222	19.8412	19.8374	19.5698	19.4204	19.7243	19.623	18.428	18.4299	19.0978	19.4467	19.0951				-1			acetylpyruvate hydrolase activity;catalytic activity;hydrolase activity;hydrolase activity, acting on acid carbon-carbon bonds;hydrolase activity, acting on acid carbon-carbon bonds, in ketonic substances	cellular anatomical entity;intracellular membrane-bounded organelle;intracellular organelle;membrane-bounded organelle;mitochondrion;organelle		cellular anatomical entity;intracellular membrane-bounded organelle;intracellular organelle;mitochondrion;organelle		FAA_hydrolase		Referenceproteome			GO:0003824;GO:0016787;GO:0016822;GO:0016823;GO:0018773	GO:0005739;GO:0043226;GO:0043227;GO:0043229;GO:0043231;GO:0110165		GO:0005739;GO:0043226;GO:0043229;GO:0043231;GO:0110165	1	1	1	6.2	6.2	6.2	23.967	0	9.4571	7864100	7	0	A0A0R0J7Q6;A0A0R0FG80	A0A0R0J7Q6;A0A0R0FG80	106	GLYMA_07G245900;GLYMA_17G028100	KRH02275;KRH50814	KRH02275;KRH50814
17.1148	16.3372	16.3388	16.2864	15.9248	16.5067	16.1417	16.9516	16.9339	15.8484	15.2737	16.997				-1		amino acid activation;amino acid metabolic process;carboxylic acid metabolic process;cellular aromatic compound metabolic process;cellular metabolic process;cellular nitrogen compound metabolic process;cellular process;heterocycle metabolic process;macromolecule metabolic process;metabolic process;ncRNA metabolic process;nitrogen compound metabolic process;nucleic acid metabolic process;nucleobas…	adenyl nucleotide binding;adenyl ribonucleotide binding;aminoacyl-tRNA ligase activity;anion binding;ATP binding;binding;carbohydrate derivative binding;catalytic activity;catalytic activity, acting on a nucleic acid;catalytic activity, acting on a tRNA;catalytic activity, acting on RNA;heterocyclic compound binding;ion binding;ligase activity;ligase activity, forming carbon-oxygen bonds;nucleic …	cellular anatomical entity;cytoplasm;intracellular membrane-bounded organelle;intracellular organelle;intracellular organelle lumen;membrane-bounded organelle;membrane-enclosed lumen;mitochondrial matrix;mitochondrion;organelle;organelle lumen	amino acid metabolic process;cellular aromatic compound metabolic process;cellular nitrogen compound metabolic process;cellular process;heterocycle metabolic process;macromolecule metabolic process;metabolic process;nitrogen compound metabolic process;nucleobase-containing compound metabolic process;organic acid metabolic process;primary metabolic process;RNA metabolic process;small molecule meta…	cellular anatomical entity;cytoplasm;intracellular membrane-bounded organelle;intracellular organelle;mitochondrion;organelle;organelle lumen		FDX-ACB;tRNA-synt_2d		Mitochondrion;Referenceproteome;Transitpeptide		GO:0006082;GO:0006139;GO:0006399;GO:0006418;GO:0006432;GO:0006520;GO:0006725;GO:0006807;GO:0008152;GO:0009987;GO:0016070;GO:0019752;GO:0034641;GO:0034660;GO:0043038;GO:0043039;GO:0043170;GO:0043436;GO:0044237;GO:0044238;GO:0044281;GO:0046483;GO:0071704;GO:0090304;GO:1901360;GO:1901564	GO:0000049;GO:0000166;GO:0003676;GO:0003723;GO:0003824;GO:0004812;GO:0004826;GO:0005488;GO:0005524;GO:0016874;GO:0016875;GO:0017076;GO:0030554;GO:0032553;GO:0032555;GO:0032559;GO:0035639;GO:0036094;GO:0043167;GO:0043168;GO:0097159;GO:0097367;GO:0140098;GO:0140101;GO:0140640;GO:1901265;GO:1901363	GO:0005737;GO:0005739;GO:0005759;GO:0031974;GO:0043226;GO:0043227;GO:0043229;GO:0043231;GO:0043233;GO:0070013;GO:0110165	GO:0006082;GO:0006139;GO:0006399;GO:0006418;GO:0006520;GO:0006725;GO:0006807;GO:0008152;GO:0009987;GO:0016070;GO:0034641;GO:0043170;GO:0044238;GO:0044281;GO:0046483	GO:0005737;GO:0005739;GO:0043226;GO:0043229;GO:0043231;GO:0043233;GO:0110165	3	3	3	14	14	14	26.647	0	10.571	2066200	31	0	C6TLF8;A0A0R0FGB9;K7MVE7;I1JDN2	C6TLF8;A0A0R0FGB9;K7MVE7;I1JDN2	107	GLYMA_02G091300;GLYMA_18G291800	KRH01673;KRH01674;KRH01675;KRH70451;KRH70452;KRH70453;KRH70454	KRH01673;KRH01674;KRH01675;KRH70451;KRH70452;KRH70453;KRH70454
16.8456	15.8683	17.6539	17.9617	14.7922	17.091	18.2422	17.6971	17.6982	16.9863	20.3589	18.9356				-1		carbohydrate catabolic process;carbohydrate metabolic process;catabolic process;disaccharide catabolic process;disaccharide metabolic process;metabolic process;oligosaccharide catabolic process;oligosaccharide metabolic process;organic substance catabolic process;organic substance metabolic process;primary metabolic process;sucrose catabolic process;sucrose metabolic process	alpha-amylase activity;amylase activity;binding;calcium ion binding;catalytic activity;cation binding;hydrolase activity;hydrolase activity, acting on glycosyl bonds;hydrolase activity, hydrolyzing O-glycosyl compounds;ion binding;metal ion binding		carbohydrate metabolic process;catabolic process;metabolic process;oligosaccharide metabolic process;primary metabolic process			Alpha-amyl_C2;Alpha-amylase		Carbohydratemetabolism;Glycosidase;Hydrolase;Referenceproteome;Signal		GO:0005975;GO:0005984;GO:0005985;GO:0005987;GO:0008152;GO:0009056;GO:0009311;GO:0009313;GO:0016052;GO:0044238;GO:0046352;GO:0071704;GO:1901575	GO:0003824;GO:0004553;GO:0004556;GO:0005488;GO:0005509;GO:0016160;GO:0016787;GO:0016798;GO:0043167;GO:0043169;GO:0046872		GO:0005975;GO:0008152;GO:0009056;GO:0009311;GO:0044238		2	2	2	6.1	6.1	6.1	43.845	0	7.9994	3467400	3	5	A0A0R0FHY5;I1MXP2;C6T9Z1	A0A0R0FHY5;I1MXP2;C6T9Z1	109	GLYMA_17G242400	KRH05686;KRH05687	KRH05686;KRH05687
20.3145	19.5113	20.3442	19.8059	20.0451	19.9305	19.1822	19.6474	19.6496	19.4968	19.978	19.9601				-1		cellular component disassembly;cellular component organization;cellular component organization or biogenesis;cellular process;organelle disassembly;organelle organization;ribosome disassembly	binding;nucleic acid binding;organic cyclic compound binding;protein-containing complex binding;ribonucleoprotein complex binding;ribosome binding;translation factor activity, RNA binding;translation initiation factor activity;translation regulator activity;translation regulator activity, nucleic acid binding	cellular anatomical entity;chloroplast;cytoplasm;intracellular membrane-bounded organelle;intracellular organelle;membrane-bounded organelle;organelle;plastid	cellular component disassembly;cellular component organization;cellular component organization or biogenesis;cellular process;organelle organization	cellular anatomical entity;chloroplast;cytoplasm;intracellular membrane-bounded organelle;intracellular organelle;organelle;plastid		IF3_C;IF3_N		Initiationfactor;Proteinbiosynthesis;Referenceproteome		GO:0006996;GO:0009987;GO:0016043;GO:0022411;GO:0032790;GO:0071840;GO:1903008	GO:0003676;GO:0003743;GO:0005488;GO:0008135;GO:0043021;GO:0043022;GO:0044877;GO:0045182;GO:0090079;GO:0097159	GO:0005737;GO:0009507;GO:0009536;GO:0043226;GO:0043227;GO:0043229;GO:0043231;GO:0110165	GO:0006996;GO:0009987;GO:0016043;GO:0022411;GO:0071840	GO:0005737;GO:0009507;GO:0009536;GO:0043226;GO:0043229;GO:0043231;GO:0110165	3	3	3	15.1	15.1	15.1	30.443	0	38.483	17662000	23	0	A0A0R0FI85;I1MT09;I1JGR6;C6TD39	A0A0R0FI85;I1MT09;I1JGR6;C6TD39	110	GLYMA_02G205700;GLYMA_17G072300	KRH03027;KRH03028;KRH72328	KRH03027;KRH03028;KRH72328
21.4807	21.378	21.2625	20.7198	21.3506	21.5001	21.6816	21.3069	21.3091	21.5107	21.9885	21.841				-1		biological process involved in interspecies interaction between organisms;cellular process;establishment of localization;localization;macromolecule metabolic process;metabolic process;nitrogen compound metabolic process;organic substance metabolic process;organonitrogen compound metabolic process;primary metabolic process;protein metabolic process;proteolysis;response to biotic stimulus;response …	catalytic activity;catalytic activity, acting on a protein;endopeptidase activity;hydrolase activity;peptidase activity;serine hydrolase activity;serine-type endopeptidase activity;serine-type peptidase activity	cellular anatomical entity;extracellular region;membrane	biological process involved in interspecies interaction between organisms;cellular process;establishment of localization;localization;macromolecule metabolic process;metabolic process;nitrogen compound metabolic process;primary metabolic process;protein metabolic process;proteolysis;response to biotic stimulus;response to external stimulus;response to stimulus;transmembrane transport;transport	cellular anatomical entity;extracellular region;membrane		fn3_6;Inhibitor_I9;Na_Ca_ex;PA;Peptidase_S8		Glycoprotein;Hydrolase;Membrane;Protease;Referenceproteome;Secreted;Serineprotease;Transmembrane;Transmembranehelix		GO:0006508;GO:0006807;GO:0006810;GO:0008152;GO:0009605;GO:0009607;GO:0009608;GO:0009610;GO:0009620;GO:0009987;GO:0019538;GO:0043170;GO:0043207;GO:0044238;GO:0044419;GO:0050896;GO:0051179;GO:0051234;GO:0051707;GO:0055085;GO:0071704;GO:1901564	GO:0003824;GO:0004175;GO:0004252;GO:0008233;GO:0008236;GO:0016787;GO:0017171;GO:0140096	GO:0005576;GO:0016020;GO:0110165	GO:0006508;GO:0006807;GO:0006810;GO:0008152;GO:0009605;GO:0009607;GO:0009987;GO:0019538;GO:0043170;GO:0044238;GO:0044419;GO:0050896;GO:0051179;GO:0051234;GO:0055085	GO:0005576;GO:0016020;GO:0110165	19	5	5	20.7	5.2	5.2	152.93	0	161.36	121770000	125	0	A0A0R0FJI5	A0A0R0FJI5	112	GLYMA_16G008900	KRH06199	KRH06199
15.8763	19.5559	19.3921	18.6327	19.5037	16.3798	17.9475	17.5743	17.5761	16.2989	18.5144	19.0456				-1			binding;nucleic acid binding;organic cyclic compound binding;protein-containing complex binding;ribonucleoprotein complex binding;ribosome binding;RNA binding;translation factor activity, RNA binding;translation initiation factor activity;translation regulator activity;translation regulator activity, nucleic acid binding	cellular anatomical entity;chloroplast;cytosol;intracellular membrane-bounded organelle;intracellular organelle;membrane-bounded organelle;organelle;plastid		cellular anatomical entity;chloroplast;cytosol;intracellular membrane-bounded organelle;intracellular organelle;organelle;plastid		eIF-1a		Chloroplast;Initiationfactor;Plastid;Proteinbiosynthesis;Referenceproteome;Transitpeptide			GO:0003676;GO:0003723;GO:0003743;GO:0005488;GO:0008135;GO:0043021;GO:0043022;GO:0044877;GO:0045182;GO:0090079;GO:0097159	GO:0005829;GO:0009507;GO:0009536;GO:0043226;GO:0043227;GO:0043229;GO:0043231;GO:0110165		GO:0005829;GO:0009507;GO:0009536;GO:0043226;GO:0043229;GO:0043231;GO:0110165	1	1	1	10.1	10.1	10.1	15.43	0	21.512	3914300	7	3	Q94KR7;A0A0R0FJK8;I1JZH0	Q94KR7;A0A0R0FJK8;I1JZH0	113	GLYMA_05G019600;GLYMA_17G080200	KRH03161;KRH56784	KRH03161;KRH56784
22.9424	22.6997	22.8768	22.6112	23.0978	22.9288	23.1243	23.2243	23.2266	23.7527	23.6434	22.9988				-1		amide biosynthetic process;amide metabolic process;biosynthetic process;cellular biosynthetic process;cellular component assembly;cellular component organization;cellular component organization or biogenesis;cellular metabolic process;cellular nitrogen compound biosynthetic process;cellular nitrogen compound metabolic process;cellular process;cytoplasmic translation;macromolecule biosynthetic pro…	structural constituent of ribosome;structural molecule activity	cytosolic small ribosomal subunit;protein-containing complex;ribonucleoprotein complex;ribosomal subunit;small ribosomal subunit	amide metabolic process;biosynthetic process;cellular component assembly;cellular component organization;cellular component organization or biogenesis;cellular nitrogen compound metabolic process;cellular process;cytoplasmic translation;macromolecule biosynthetic process;macromolecule metabolic process;metabolic process;nitrogen compound metabolic process;peptide metabolic process;primary metabol…	protein-containing complex;ribonucleoprotein complex;small ribosomal subunit		Ribosomal_S2		Cytoplasm;Referenceproteome;Ribonucleoprotein;Ribosomalprotein		GO:0000028;GO:0002181;GO:0006412;GO:0006518;GO:0006807;GO:0008152;GO:0009058;GO:0009059;GO:0009987;GO:0016043;GO:0019538;GO:0022607;GO:0022618;GO:0034641;GO:0043043;GO:0043170;GO:0043603;GO:0043604;GO:0043933;GO:0044237;GO:0044238;GO:0044249;GO:0044271;GO:0065003;GO:0071704;GO:0071826;GO:0071840;GO:1901564;GO:1901566;GO:1901576	GO:0003735;GO:0005198	GO:0015935;GO:0022627;GO:0032991;GO:0044391;GO:1990904	GO:0002181;GO:0006412;GO:0006518;GO:0006807;GO:0008152;GO:0009058;GO:0009059;GO:0009987;GO:0016043;GO:0019538;GO:0022607;GO:0022618;GO:0034641;GO:0043170;GO:0043603;GO:0044238;GO:0065003;GO:0071840	GO:0015935;GO:0032991;GO:1990904	10	10	6	37.5	37.5	24.6	30.886	0	51.18	311390000	259	0	A0A0R0J3D8;O22518;A0A0R0IZE4;A0A0R0FJR0	A0A0R0J3D8;O22518;A0A0R0IZE4;A0A0R0FJR0	114	GLYMA_07G043800;GLYMA_16G012200	KRH06257;KRH47681;KRH47682	KRH06257;KRH47681;KRH47682
18.9171	22.1042	18.9591	22.4151	20.8315	19.7208	21.9424	18.5482	18.5504	14.8894	20.9017	19.2272				-1								GASA		Referenceproteome;Signal							1	1	1	12.1	12.1	12.1	7.2485	0.0031323	1.9602	19574000	72	1	K7LXN9;K7KVU4;I1MTK8;K7KMN0;C6SYY5;A0A0R0FKI8;C6SVF3	K7LXN9;K7KVU4;I1MTK8;K7KMN0;C6SYY5;A0A0R0FKI8;C6SVF3	115	GLYMA_04G179500;GLYMA_05G034500;GLYMA_06G185300;GLYMA_13G054100;GLYMA_17G092800	KRH03354;KRH03355;KRH18362;KRH54442;KRH57027;KRH63474	KRH03354;KRH03355;KRH18362;KRH54442;KRH57027;KRH63474
20.3565	15.7358	18.9197	15.756	14.9081	18.5945	15.5809	19.7256	19.7274	19.889	19.5078	19.5226				-1		carbohydrate metabolic process;metabolic process;organic substance metabolic process;primary metabolic process	binding;carbohydrate binding;catalytic activity;glucose-6-phosphate 1-epimerase activity;isomerase activity;racemase and epimerase activity;racemase and epimerase activity, acting on carbohydrates and derivatives		carbohydrate metabolic process;metabolic process;primary metabolic process					Referenceproteome		GO:0005975;GO:0008152;GO:0044238;GO:0071704	GO:0003824;GO:0005488;GO:0016853;GO:0016854;GO:0016857;GO:0030246;GO:0047938		GO:0005975;GO:0008152;GO:0044238		2	2	2	5.3	5.3	5.3	39.204	0	3.8573	7955000	10	4	I1N873;A0A0R0FL97	I1N873;A0A0R0FL97	116	GLYMA_16G041700;GLYMA_19G110700	KRG94805;KRH06718	KRG94805;KRH06718
15.1715	15.4938	15.1496	15.4127	14.8253	15.2194	15.1884	15.2136	15.2158	14.6916	14.2572	13.9897				-1		aromatic compound catabolic process;catabolic process;cellular aromatic compound metabolic process;cellular catabolic process;cellular metabolic process;cellular nitrogen compound catabolic process;cellular nitrogen compound metabolic process;cellular process;heterocycle catabolic process;heterocycle metabolic process;metabolic process;nitrogen compound metabolic process;nucleobase-containing com…	adenyl nucleotide binding;adenyl ribonucleotide binding;anion binding;ATP binding;binding;carbohydrate derivative binding;catalytic activity;heterocyclic compound binding;hydrolase activity;hydrolase activity, acting on acid anhydrides;hydrolase activity, acting on acid anhydrides, in phosphorus-containing anhydrides;ion binding;nucleoside diphosphate phosphatase activity;nucleoside phosphate bin…	cellular anatomical entity;membrane	catabolic process;cellular aromatic compound metabolic process;cellular nitrogen compound metabolic process;cellular process;heterocycle metabolic process;metabolic process;nitrogen compound metabolic process;nucleobase-containing compound catabolic process;nucleobase-containing compound metabolic process;nucleobase-containing small molecule metabolic process;phosphorus metabolic process;primary …	cellular anatomical entity;membrane		GDA1_CD39		ATP-binding;Hydrolase;Membrane;Nucleotide-binding;Referenceproteome;Transmembrane;Transmembranehelix		GO:0006139;GO:0006725;GO:0006753;GO:0006793;GO:0006796;GO:0006807;GO:0008152;GO:0009056;GO:0009132;GO:0009134;GO:0009987;GO:0019439;GO:0019637;GO:0034641;GO:0034655;GO:0044237;GO:0044238;GO:0044248;GO:0044270;GO:0044281;GO:0046434;GO:0046483;GO:0046700;GO:0055086;GO:0071704;GO:1901292;GO:1901360;GO:1901361;GO:1901575	GO:0000166;GO:0003824;GO:0005488;GO:0005524;GO:0016462;GO:0016787;GO:0016817;GO:0016818;GO:0017076;GO:0017110;GO:0030554;GO:0032553;GO:0032555;GO:0032559;GO:0035639;GO:0036094;GO:0043167;GO:0043168;GO:0097159;GO:0097367;GO:1901265;GO:1901363	GO:0016020;GO:0110165	GO:0006139;GO:0006725;GO:0006793;GO:0006807;GO:0008152;GO:0009056;GO:0009987;GO:0034641;GO:0034655;GO:0044238;GO:0044281;GO:0046483;GO:0055086	GO:0016020;GO:0110165	2	2	2	8.4	8.4	8.4	42.958	0.0016026	2.1491	435800	18	0	A0A0R0FLA7;I1ML51;I1ML52;K7MXR7	A0A0R0FLA7;I1ML51;I1ML52;K7MXR7	117	GLYMA_16G043700;GLYMA_19G108500	KRG94776;KRH06752;KRH06753;KRH06754	KRG94776;KRH06752;KRH06753;KRH06754
23.1066	23.4746	23.3393	23.3594	23.6214	23.259	24.0975	23.4663	23.5095	24.0611	23.7971	23.0899				-1		amide biosynthetic process;amide metabolic process;biosynthetic process;cellular biosynthetic process;cellular metabolic process;cellular nitrogen compound biosynthetic process;cellular nitrogen compound metabolic process;cellular process;macromolecule biosynthetic process;macromolecule metabolic process;metabolic process;nitrogen compound metabolic process;organic substance biosynthetic process;…	anion binding;binding;carbohydrate derivative binding;catalytic activity;GTP binding;GTPase activity;guanyl nucleotide binding;guanyl ribonucleotide binding;heterocyclic compound binding;hydrolase activity;hydrolase activity, acting on acid anhydrides;hydrolase activity, acting on acid anhydrides, in phosphorus-containing anhydrides;ion binding;nucleic acid binding;nucleoside phosphate binding;nu…		amide metabolic process;biosynthetic process;cellular nitrogen compound metabolic process;cellular process;macromolecule biosynthetic process;macromolecule metabolic process;metabolic process;nitrogen compound metabolic process;peptide metabolic process;primary metabolic process;protein metabolic process;translation;translational elongation			GTP_EFTU;GTP_EFTU_D2;GTP_EFTU_D3		Elongationfactor;GTP-binding;Nucleotide-binding;Proteinbiosynthesis;Referenceproteome		GO:0006412;GO:0006414;GO:0006518;GO:0006807;GO:0008152;GO:0009058;GO:0009059;GO:0009987;GO:0019538;GO:0034641;GO:0043043;GO:0043170;GO:0043603;GO:0043604;GO:0044237;GO:0044238;GO:0044249;GO:0044271;GO:0071704;GO:1901564;GO:1901566;GO:1901576	GO:0000166;GO:0003676;GO:0003746;GO:0003824;GO:0003924;GO:0005488;GO:0005525;GO:0008135;GO:0016462;GO:0016787;GO:0016817;GO:0016818;GO:0017076;GO:0017111;GO:0019001;GO:0032553;GO:0032555;GO:0032561;GO:0035639;GO:0036094;GO:0043167;GO:0043168;GO:0045182;GO:0090079;GO:0097159;GO:0097367;GO:1901265;GO:1901363		GO:0006412;GO:0006414;GO:0006518;GO:0006807;GO:0008152;GO:0009058;GO:0009059;GO:0009987;GO:0019538;GO:0034641;GO:0043170;GO:0043603;GO:0044238		14	1	0	36.9	5.4	0	49.406	0	6.5154	164060000	44	0	A0A0R0FM97;A0A0R4J4C3	A0A0R0FM97;A0A0R4J4C3	120	GLYMA_10G212900;GLYMA_16G068000	KRH07098;KRH34904	KRH07098;KRH34904
18.773	19.843	18.9842	19.3367	18.9772	19.1685	19.855	19.2055	19.2077	18.9457	18.6042	19.0019				-1										Referenceproteome							6	6	6	2.8	2.8	2.8	457.28	0	12.238	8434400	67	0	A0A0R0FXZ0;A0A0R0FMI4;A0A0R0FMH4;A0A0R0FMF4	A0A0R0FXZ0;A0A0R0FMI4;A0A0R0FMH4;A0A0R0FMF4	121	GLYMA_16G071500	KRH07165;KRH07166;KRH07167;KRH07168	KRH07165;KRH07166;KRH07167;KRH07168
21.6684	20.1016	20.1767	19.715	19.9701	20.2392	20.0574	22.0794	22.0641	21.2688	20.3997	20.7304				-1		amide biosynthetic process;amide metabolic process;biosynthetic process;cellular biosynthetic process;cellular component disassembly;cellular component organization;cellular component organization or biogenesis;cellular metabolic process;cellular nitrogen compound biosynthetic process;cellular nitrogen compound metabolic process;cellular process;macromolecule biosynthetic process;macromolecule me…	anion binding;binding;carbohydrate derivative binding;catalytic activity;GTP binding;GTPase activity;guanyl nucleotide binding;guanyl ribonucleotide binding;heterocyclic compound binding;hydrolase activity;hydrolase activity, acting on acid anhydrides;hydrolase activity, acting on acid anhydrides, in phosphorus-containing anhydrides;ion binding;nucleic acid binding;nucleoside phosphate binding;nu…	cellular anatomical entity;chloroplast;intracellular membrane-bounded organelle;intracellular organelle;membrane-bounded organelle;mitochondrion;organelle;plastid	amide metabolic process;biosynthetic process;cellular component disassembly;cellular component organization;cellular component organization or biogenesis;cellular nitrogen compound metabolic process;cellular process;macromolecule biosynthetic process;macromolecule metabolic process;metabolic process;mitochondrial translation;nitrogen compound metabolic process;organelle organization;peptide metab…	cellular anatomical entity;chloroplast;intracellular membrane-bounded organelle;intracellular organelle;mitochondrion;organelle;plastid		EFG_C;EFG_III;EFG_IV;GTP_EFTU;GTP_EFTU_D2		Chloroplast;Elongationfactor;GTP-binding;Nucleotide-binding;Plastid;Proteinbiosynthesis;Referenceproteome;Transitpeptide		GO:0006412;GO:0006518;GO:0006807;GO:0006996;GO:0008152;GO:0009058;GO:0009059;GO:0009987;GO:0016043;GO:0019538;GO:0022411;GO:0032543;GO:0032790;GO:0034641;GO:0043043;GO:0043170;GO:0043603;GO:0043604;GO:0044237;GO:0044238;GO:0044249;GO:0044271;GO:0071704;GO:0071840;GO:1901564;GO:1901566;GO:1901576;GO:1903008	GO:0000166;GO:0003676;GO:0003746;GO:0003824;GO:0003924;GO:0005488;GO:0005525;GO:0008135;GO:0016462;GO:0016787;GO:0016817;GO:0016818;GO:0017076;GO:0017111;GO:0019001;GO:0032553;GO:0032555;GO:0032561;GO:0035639;GO:0036094;GO:0043167;GO:0043168;GO:0045182;GO:0090079;GO:0097159;GO:0097367;GO:1901265;GO:1901363	GO:0005739;GO:0009507;GO:0009536;GO:0043226;GO:0043227;GO:0043229;GO:0043231;GO:0110165	GO:0006412;GO:0006518;GO:0006807;GO:0006996;GO:0008152;GO:0009058;GO:0009059;GO:0009987;GO:0016043;GO:0019538;GO:0022411;GO:0032543;GO:0034641;GO:0043170;GO:0043603;GO:0044238;GO:0071840	GO:0005739;GO:0009507;GO:0009536;GO:0043226;GO:0043229;GO:0043231;GO:0110165	18	18	4	34.9	34.9	7.4	86.899	0	127.89	113790000	213	0	A0A0R0FND6;P34811;C6TEP9	A0A0R0FND6;P34811;C6TEP9	122	GLYMA_17G137600	KRH04069	KRH04069
19.3299	19.3981	20.218	20.0139	20.0317	20.5194	20.0415	19.2589	19.2635	20.071	20.6896	20.3709				-1		cellular metabolic process;cellular process;metabolic process;phosphate-containing compound metabolic process;phosphorus metabolic process;phosphorylation	adenyl nucleotide binding;adenyl ribonucleotide binding;adenylate kinase activity;anion binding;ATP binding;binding;carbohydrate derivative binding;catalytic activity;heterocyclic compound binding;ion binding;kinase activity;nucleobase-containing compound kinase activity;nucleoside monophosphate kinase activity;nucleoside phosphate binding;nucleotide binding;organic cyclic compound binding;phosph…	cellular anatomical entity;cytoplasm;intracellular membrane-bounded organelle;intracellular organelle;membrane-bounded organelle;mitochondrion;organelle	cellular process;metabolic process;phosphorus metabolic process;phosphorylation	cellular anatomical entity;cytoplasm;intracellular membrane-bounded organelle;intracellular organelle;mitochondrion;organelle		ADK;ADK_lid		Kinase;Referenceproteome;Transferase		GO:0006793;GO:0006796;GO:0008152;GO:0009987;GO:0016310;GO:0044237	GO:0000166;GO:0003824;GO:0004017;GO:0005488;GO:0005524;GO:0016301;GO:0016740;GO:0016772;GO:0016776;GO:0017076;GO:0019205;GO:0030554;GO:0032553;GO:0032555;GO:0032559;GO:0035639;GO:0036094;GO:0043167;GO:0043168;GO:0050145;GO:0097159;GO:0097367;GO:1901265;GO:1901363	GO:0005737;GO:0005739;GO:0043226;GO:0043227;GO:0043229;GO:0043231;GO:0110165	GO:0006793;GO:0008152;GO:0009987;GO:0016310	GO:0005737;GO:0005739;GO:0043226;GO:0043229;GO:0043231;GO:0110165	13	2	2	69.8	12.4	12.4	26.641	0	10.437	13667000	29	0	A0A0R0FND9;I1MUN1;I1MUN0;C6SY23;I1MUN2;C6TKB1;A0A0R0KXU6;A0A0R0JMP6	A0A0R0FND9;I1MUN1;I1MUN0;C6SY23;I1MUN2;C6TKB1	123	GLYMA_17G128300	KRH03923;KRH03924;KRH03925;KRH03926	KRH03923;KRH03924;KRH03925;KRH03926
21.6251	21.2918	21.5249	21.1928	21.4185	21.3503	21.4516	21.9124	21.9146	22.0944	22.0974	21.7683				-1		amino acid metabolic process;biosynthetic process;carboxylic acid metabolic process;cellular metabolic process;cellular process;metabolic process;nitrogen compound metabolic process;organic acid metabolic process;organic substance metabolic process;organonitrogen compound metabolic process;oxoacid metabolic process;primary metabolic process;small molecule metabolic process	anion binding;binding;catalytic activity;heterocyclic compound binding;ion binding;L-aspartate:2-oxoglutarate aminotransferase activity;organic cyclic compound binding;pyridoxal phosphate binding;small molecule binding;transaminase activity;transferase activity;transferase activity, transferring nitrogenous groups;vitamin B6 binding;vitamin binding	cellular anatomical entity;chloroplast;intracellular membrane-bounded organelle;intracellular organelle;membrane-bounded organelle;organelle;plastid	amino acid metabolic process;biosynthetic process;cellular process;metabolic process;nitrogen compound metabolic process;organic acid metabolic process;primary metabolic process;small molecule metabolic process	cellular anatomical entity;chloroplast;intracellular membrane-bounded organelle;intracellular organelle;organelle;plastid		Aminotran_1_2		Aminotransferase;Chloroplast;Plastid;Referenceproteome;Transferase		GO:0006082;GO:0006520;GO:0006807;GO:0008152;GO:0009058;GO:0009987;GO:0019752;GO:0043436;GO:0044237;GO:0044238;GO:0044281;GO:0071704;GO:1901564	GO:0003824;GO:0004069;GO:0005488;GO:0008483;GO:0016740;GO:0016769;GO:0019842;GO:0030170;GO:0036094;GO:0043167;GO:0043168;GO:0070279;GO:0097159;GO:1901363	GO:0009507;GO:0009536;GO:0043226;GO:0043227;GO:0043229;GO:0043231;GO:0110165	GO:0006082;GO:0006520;GO:0006807;GO:0008152;GO:0009058;GO:0009987;GO:0044238;GO:0044281	GO:0009507;GO:0009536;GO:0043226;GO:0043229;GO:0043231;GO:0110165	20	20	5	52.5	52.5	12.5	50.585	0	166.81	191910000	263	0	Q42794;A0A0R0FQN0;C6TNL0;Q41199	Q42794;A0A0R0FQN0;C6TNL0;Q41199	125	GLYMA_17G216000	KRH05255;KRH05256	KRH05255;KRH05256
18.3194	15.9417	18.9756	17.3875	19.2882	18.8022	15.6379	18.8479	18.8502	19.1103	19.7967	19.077				-1		catabolic process;cellular catabolic process;cellular metabolic process;cellular process;hydrogen peroxide catabolic process;hydrogen peroxide metabolic process;metabolic process;organic substance catabolic process;organic substance metabolic process;reactive oxygen species metabolic process;response to chemical;response to hydrogen peroxide;response to inorganic substance;response to organic sub…	antioxidant activity;binding;catalase activity;catalytic activity;cation binding;heme binding;ion binding;metal ion binding;organic cyclic compound binding;oxidoreductase activity;oxidoreductase activity, acting on peroxide as acceptor;peroxidase activity;tetrapyrrole binding	cellular anatomical entity;cytoplasm;glyoxysome;intracellular membrane-bounded organelle;intracellular organelle;membrane;membrane-bounded organelle;microbody;organelle;peroxisome;plasma membrane	catabolic process;cellular process;metabolic process;response to chemical;response to oxidative stress;response to stimulus;response to stress	cellular anatomical entity;cytoplasm;intracellular membrane-bounded organelle;intracellular organelle;membrane;microbody;organelle;peroxisome;plasma membrane		Catalase;Catalase-rel		Glyoxysome;Heme;Hydrogenperoxide;Iron;Metal-binding;Oxidoreductase;Peroxidase;Peroxisome;Referenceproteome		GO:0000302;GO:0006950;GO:0006979;GO:0008152;GO:0009056;GO:0009987;GO:0010033;GO:0010035;GO:0042221;GO:0042542;GO:0042743;GO:0042744;GO:0044237;GO:0044248;GO:0050896;GO:0071704;GO:0072593;GO:1901575;GO:1901700	GO:0003824;GO:0004096;GO:0004601;GO:0005488;GO:0016209;GO:0016491;GO:0016684;GO:0020037;GO:0043167;GO:0043169;GO:0046872;GO:0046906;GO:0097159	GO:0005737;GO:0005777;GO:0005886;GO:0009514;GO:0016020;GO:0042579;GO:0043226;GO:0043227;GO:0043229;GO:0043231;GO:0110165	GO:0006950;GO:0006979;GO:0008152;GO:0009056;GO:0009987;GO:0042221;GO:0050896	GO:0005737;GO:0005777;GO:0005886;GO:0016020;GO:0042579;GO:0043226;GO:0043229;GO:0043231;GO:0110165	9	3	3	22.8	5.7	5.7	56.846	0	3.587	7161800	16	3	P29756;A0A0R0FSY1;O48560;A0A0R0GNE3;C6TJJ3	P29756;A0A0R0FSY1;O48560;A0A0R0GNE3	127	GLYMA_14G223500;GLYMA_17G261700	KRH06008;KRH17522	KRH06008;KRH17522
20.8593	20.3655	20.4187	19.617	19.4883	20.0847	19.699	16.6829	19.7472	21.2219	20.9298	20.2652				-1		cellular metabolic process;cellular process;generation of precursor metabolites and energy;metabolic process;photosynthesis, light harvesting;photosynthesis, light harvesting in photosystem I;response to abiotic stimulus;response to light stimulus;response to radiation;response to stimulus	binding;chlorophyll binding;organic cyclic compound binding;tetrapyrrole binding	bounding membrane of organelle;cellular anatomical entity;chloroplast thylakoid membrane;membrane;membrane protein complex;organelle membrane;organelle outer membrane;outer membrane;photosynthetic membrane;photosystem;photosystem I;photosystem II;plastid membrane;plastid thylakoid membrane;protein-containing complex;thylakoid membrane	cellular process;generation of precursor metabolites and energy;metabolic process;response to abiotic stimulus;response to light stimulus;response to stimulus	cellular anatomical entity;membrane;membrane protein complex;outer membrane;photosystem;protein-containing complex		Chloroa_b-bind		Chlorophyll;Chloroplast;Chromophore;Photosynthesis;PhotosystemI;PhotosystemII;Plastid;Referenceproteome;Thylakoid		GO:0006091;GO:0008152;GO:0009314;GO:0009416;GO:0009628;GO:0009765;GO:0009768;GO:0009987;GO:0044237;GO:0050896	GO:0005488;GO:0016168;GO:0046906;GO:0097159	GO:0009521;GO:0009522;GO:0009523;GO:0009535;GO:0016020;GO:0019867;GO:0031090;GO:0031968;GO:0032991;GO:0034357;GO:0042170;GO:0042651;GO:0055035;GO:0098588;GO:0098796;GO:0110165	GO:0006091;GO:0008152;GO:0009416;GO:0009628;GO:0009987;GO:0050896	GO:0009521;GO:0016020;GO:0019867;GO:0032991;GO:0098796;GO:0110165	7	1	1	30.1	6.9	6.9	30.694	0	10.014	14915000	15	1	C6TKE6;A0A0R0FSY2	C6TKE6;A0A0R0FSY2	128	GLYMA_16G205200	KRH09238	KRH09238
22.9789	23.0517	23.2819	22.8714	23.2411	23.2876	22.9375	23.1406	23.1428	22.6272	23.0778	23.4059				-1			amino acid binding;anion binding;binding;carboxylic acid binding;ion binding;organic acid binding;small molecule binding							Referenceproteome;Repeat			GO:0005488;GO:0016597;GO:0031406;GO:0036094;GO:0043167;GO:0043168;GO:0043177				10	10	3	47.4	47.4	23.2	31.292	0	82.311	386060000	289	0	A0A0R0FTU5;I1MCA5;A0A0R0FUA6;A0A0R0G536;I1MCA7;C6T9M2;C6T683	A0A0R0FTU5;I1MCA5;A0A0R0FUA6;A0A0R0G536;I1MCA7	129	GLYMA_15G003200	KRH09646;KRH09647;KRH09648;KRH09649;KRH09650;KRH09651	KRH09646;KRH09647;KRH09648;KRH09649;KRH09650;KRH09651
16.9232	16.1083	15.6007	16.5799	20.139	15.1096	16.0487	18.971	18.9727	18.9679	20.3044	19.244				-1		cellular metabolic process;cellular process;electron transport chain;generation of precursor metabolites and energy;metabolic process;P450-containing electron transport chain	2 iron, 2 sulfur cluster binding;binding;iron-sulfur cluster binding;metal cluster binding	bounding membrane of organelle;cellular anatomical entity;chloroplast thylakoid membrane;membrane;organelle membrane;organelle outer membrane;outer membrane;photosynthetic membrane;plastid membrane;plastid thylakoid membrane;thylakoid membrane	cellular process;electron transport chain;generation of precursor metabolites and energy;metabolic process	cellular anatomical entity;membrane;outer membrane		Fer2		Iron;Iron-sulfur;Metal-binding;Referenceproteome		GO:0006091;GO:0008152;GO:0009987;GO:0022900;GO:0044237;GO:0140647	GO:0005488;GO:0051536;GO:0051537;GO:0051540	GO:0009535;GO:0016020;GO:0019867;GO:0031090;GO:0031968;GO:0034357;GO:0042170;GO:0042651;GO:0055035;GO:0098588;GO:0110165	GO:0006091;GO:0008152;GO:0009987;GO:0022900	GO:0016020;GO:0019867;GO:0110165	2	2	2	15.3	15.3	15.3	17.5	0	3.3612	6135400	3	6	A0A0R0FV95;I1MCT0;C6T195	A0A0R0FV95;I1MCT0;C6T195	131	GLYMA_13G356100;GLYMA_15G018000	KRH09910;KRH09911;KRH23421	KRH09910;KRH09911;KRH23421
21.1255	21.8758	22.0269	22.1008	22.3266	22.1472	22.3008	21.3278	21.3301	21.786	22.8346	22.4381				-1		macromolecule metabolic process;metabolic process;nitrogen compound metabolic process;organic substance metabolic process;organonitrogen compound metabolic process;primary metabolic process;protein metabolic process;proteolysis;secondary metabolic process	acyltransferase activity;acyltransferase activity, transferring groups other than amino-acyl groups;carboxypeptidase activity;catalytic activity;catalytic activity, acting on a protein;exopeptidase activity;hydrolase activity;peptidase activity;serine hydrolase activity;serine-type carboxypeptidase activity;serine-type exopeptidase activity;serine-type peptidase activity;transferase activity	cellular anatomical entity;extracellular region	macromolecule metabolic process;metabolic process;nitrogen compound metabolic process;primary metabolic process;protein metabolic process;proteolysis;secondary metabolic process	cellular anatomical entity;extracellular region		Peptidase_S10		Carboxypeptidase;Disulfidebond;Hydrolase;Protease;Referenceproteome;Secreted;Signal		GO:0006508;GO:0006807;GO:0008152;GO:0019538;GO:0019748;GO:0043170;GO:0044238;GO:0071704;GO:1901564	GO:0003824;GO:0004180;GO:0004185;GO:0008233;GO:0008236;GO:0008238;GO:0016740;GO:0016746;GO:0016747;GO:0016787;GO:0017171;GO:0070008;GO:0140096	GO:0005576;GO:0110165	GO:0006508;GO:0006807;GO:0008152;GO:0019538;GO:0019748;GO:0043170;GO:0044238	GO:0005576;GO:0110165	9	9	9	21.7	21.7	21.7	55.686	0	42.911	134610000	156	0	A0A0R0FVK4;I1MM56;I1MM55	A0A0R0FVK4;I1MM56;I1MM55	132	GLYMA_16G082700	KRH07346;KRH07347;KRH07348;KRH07349	KRH07346;KRH07347;KRH07348;KRH07349
16.511	17.3399	17.3571	18.4918	17.9508	16.5889	18.4647	16.4686	16.8833	16.3527	16.0706	16.8883				-1		cellular process;chaperone-mediated protein folding;macromolecule metabolic process;macromolecule modification;metabolic process;nitrogen compound metabolic process;organic substance metabolic process;organonitrogen compound metabolic process;peptidyl-amino acid modification;peptidyl-proline modification;primary metabolic process;protein folding;protein metabolic process;protein modification proc…	catalytic activity;catalytic activity, acting on a protein;cis-trans isomerase activity;isomerase activity;peptidyl-prolyl cis-trans isomerase activity	cellular anatomical entity;endoplasmic reticulum;intracellular membrane-bounded organelle;intracellular organelle;membrane-bounded organelle;organelle	cellular process;macromolecule metabolic process;macromolecule modification;metabolic process;nitrogen compound metabolic process;peptidyl-amino acid modification;primary metabolic process;protein folding;protein metabolic process;protein modification process	cellular anatomical entity;endoplasmic reticulum;intracellular membrane-bounded organelle;intracellular organelle;organelle		FKBP_C		Isomerase;Referenceproteome;Rotamase;Signal		GO:0000413;GO:0006457;GO:0006807;GO:0008152;GO:0009987;GO:0018193;GO:0018208;GO:0019538;GO:0036211;GO:0043170;GO:0043412;GO:0044238;GO:0061077;GO:0071704;GO:1901564	GO:0003755;GO:0003824;GO:0016853;GO:0016859;GO:0140096	GO:0005783;GO:0043226;GO:0043227;GO:0043229;GO:0043231;GO:0110165	GO:0006457;GO:0006807;GO:0008152;GO:0009987;GO:0018193;GO:0019538;GO:0036211;GO:0043170;GO:0043412;GO:0044238	GO:0005783;GO:0043226;GO:0043229;GO:0043231;GO:0110165	6	2	2	62.3	27.3	27.3	16.698	0	4.2309	1658100	7	3	A0A0R0FW30;C6SYR2	A0A0R0FW30;C6SYR2	133	GLYMA_16G088200	KRH07427	KRH07427
20.3173	20.241	20.5848	20.0158	20.1639	20.1372	19.9998	20.6597	20.662	19.4836	20.2605	19.7241				-1			catalytic activity;hydrolase activity;hydrolase activity, acting on ester bonds					Lipase_GDSL		Referenceproteome;Signal			GO:0003824;GO:0016787;GO:0016788				4	4	4	12.6	12.6	12.6	42.795	0	47.737	34866000	85	0	A0A0R0FW44	A0A0R0FW44	134	GLYMA_16G068900	KRH07113	KRH07113
18.8526	18.7394	18.2427	18.8734	18.2358	18.8178	18.5678	16.7778	18.745	18.375	18.0656	18.6931				-1		cellular metabolic process;cellular process;dephosphorylation;macromolecule metabolic process;macromolecule modification;metabolic process;nitrogen compound metabolic process;organic substance metabolic process;organonitrogen compound metabolic process;phosphate-containing compound metabolic process;phosphorus metabolic process;primary metabolic process;protein dephosphorylation;protein metabolic…	binding;catalytic activity;catalytic activity, acting on a protein;cation binding;hydrolase activity;hydrolase activity, acting on ester bonds;ion binding;metal ion binding;myosin phosphatase activity;phosphatase activity;phosphoprotein phosphatase activity;phosphoric ester hydrolase activity;protein serine/threonine phosphatase activity	cellular anatomical entity;chloroplast;intracellular membrane-bounded organelle;intracellular organelle;membrane-bounded organelle;organelle;plastid	cellular process;macromolecule metabolic process;macromolecule modification;metabolic process;nitrogen compound metabolic process;phosphorus metabolic process;primary metabolic process;protein dephosphorylation;protein metabolic process;protein modification process	cellular anatomical entity;chloroplast;intracellular membrane-bounded organelle;intracellular organelle;organelle;plastid		SpoIIE		Hydrolase;Magnesium;Manganese;Metal-binding;Proteinphosphatase;Referenceproteome		GO:0006470;GO:0006793;GO:0006796;GO:0006807;GO:0008152;GO:0009987;GO:0016311;GO:0019538;GO:0036211;GO:0043170;GO:0043412;GO:0044237;GO:0044238;GO:0071704;GO:1901564	GO:0003824;GO:0004721;GO:0004722;GO:0005488;GO:0016787;GO:0016788;GO:0016791;GO:0017018;GO:0042578;GO:0043167;GO:0043169;GO:0046872;GO:0140096	GO:0009507;GO:0009536;GO:0043226;GO:0043227;GO:0043229;GO:0043231;GO:0110165	GO:0006470;GO:0006793;GO:0006807;GO:0008152;GO:0009987;GO:0019538;GO:0036211;GO:0043170;GO:0043412;GO:0044238	GO:0009507;GO:0009536;GO:0043226;GO:0043229;GO:0043231;GO:0110165	2	2	2	3.7	3.7	3.7	83.23	0	6.972	4987300	33	1	I1MDV6;A0A0R0FWY4	I1MDV6;A0A0R0FWY4	136	GLYMA_15G052300	KRH10512;KRH10513	KRH10512;KRH10513
19.4207	19.5328	19.7243	19.5338	19.7391	19.895	19.8104	19.4854	19.4876	20.0403	20.4233	19.9906				-1		macromolecule metabolic process;metabolic process;nitrogen compound metabolic process;organic substance metabolic process;organonitrogen compound metabolic process;primary metabolic process;protein metabolic process;proteolysis	catalytic activity;catalytic activity, acting on a protein;dipeptidyl-peptidase activity;exopeptidase activity;hydrolase activity;peptidase activity;serine hydrolase activity;serine-type peptidase activity		macromolecule metabolic process;metabolic process;nitrogen compound metabolic process;primary metabolic process;protein metabolic process;proteolysis			Peptidase_S28		Hydrolase;Referenceproteome		GO:0006508;GO:0006807;GO:0008152;GO:0019538;GO:0043170;GO:0044238;GO:0071704;GO:1901564	GO:0003824;GO:0008233;GO:0008236;GO:0008238;GO:0008239;GO:0016787;GO:0017171;GO:0140096		GO:0006508;GO:0006807;GO:0008152;GO:0019538;GO:0043170;GO:0044238		4	4	4	9.8	9.8	9.8	55.196	0	5.3397	21348000	14	0	C6TKC9;A0A0R0FXY0	C6TKC9;A0A0R0FXY0	137	GLYMA_16G130700	KRH08115;KRH08116;KRH08117	KRH08115;KRH08116;KRH08117
16.6124	15.8467	15.4464	15.3811	15.0548	15.7629	16.0163	16.3708	14.7537	17.2869	15.6369	15.6789				-1		cellular localization;cellular macromolecule localization;cellular process;COPII-coated vesicle cargo loading;endoplasmic reticulum to Golgi vesicle-mediated transport;establishment of localization;establishment of localization in cell;establishment of protein localization;Golgi vesicle transport;intracellular protein transport;intracellular transport;localization;macromolecule localization;nitro…	binding;cation binding;enzyme activator activity;enzyme regulator activity;GTPase activator activity;GTPase regulator activity;ion binding;metal ion binding;molecular function activator activity;molecular function regulator activity;nucleoside-triphosphatase regulator activity;transition metal ion binding;zinc ion binding	cellular anatomical entity;COPII vesicle coat;endoplasmic reticulum exit site;endoplasmic reticulum membrane;membrane;membrane coat;membrane protein complex;organelle membrane;protein-containing complex;vesicle coat	cellular localization;cellular process;establishment of localization;Golgi vesicle transport;intracellular protein transport;localization;macromolecule localization;protein localization;protein transport;transport;vesicle-mediated transport	cellular anatomical entity;membrane;membrane protein complex;protein-containing complex		Gelsolin;Sec23_BS;Sec23_helical;Sec23_trunk;zf-Sec23_Sec24		Cytoplasm;Cytoplasmicvesicle;Endoplasmicreticulum;ER-Golgitransport;Membrane;Metal-binding;Proteintransport;Referenceproteome;Transport;Zinc		GO:0006810;GO:0006886;GO:0006888;GO:0008104;GO:0009987;GO:0015031;GO:0016192;GO:0033036;GO:0035459;GO:0045184;GO:0046907;GO:0048193;GO:0051179;GO:0051234;GO:0051641;GO:0051649;GO:0070727;GO:0071702;GO:0071705;GO:0090110	GO:0005096;GO:0005488;GO:0008047;GO:0008270;GO:0030234;GO:0030695;GO:0043167;GO:0043169;GO:0046872;GO:0046914;GO:0060589;GO:0098772;GO:0140677	GO:0005789;GO:0016020;GO:0030117;GO:0030120;GO:0030127;GO:0031090;GO:0032991;GO:0070971;GO:0098796;GO:0110165	GO:0006810;GO:0006886;GO:0008104;GO:0009987;GO:0015031;GO:0016192;GO:0033036;GO:0048193;GO:0051179;GO:0051234;GO:0051641	GO:0016020;GO:0032991;GO:0098796;GO:0110165	1	1	1	3.2	3.2	3.2	57.363	0.0027668	2.0336	520070	3	4	A0A0R0KP53;A0A0R0KNZ0;A0A0R0FYE3;K7MFW9;I1JMB0	A0A0R0KP53;A0A0R0KNZ0;A0A0R0FYE3;K7MFW9;I1JMB0	139	GLYMA_03G091800;GLYMA_16G082400	KRH07342;KRH07343;KRH66226;KRH66227;KRH66229	KRH07342;KRH07343;KRH66226;KRH66227;KRH66229
17.2539	19.0118	15.715	19.0175	19.2607	19.6725	19.2931	18.9763	18.8843	15.4653	15.663	15.939				-1		macromolecule metabolic process;metabolic process;nitrogen compound metabolic process;organic substance metabolic process;organonitrogen compound metabolic process;primary metabolic process;protein metabolic process;proteolysis	catalytic activity;catalytic activity, acting on a protein;dipeptidyl-peptidase activity;exopeptidase activity;hydrolase activity;peptidase activity;serine hydrolase activity;serine-type peptidase activity		macromolecule metabolic process;metabolic process;nitrogen compound metabolic process;primary metabolic process;protein metabolic process;proteolysis			Peptidase_S28		Hydrolase;Referenceproteome;Signal		GO:0006508;GO:0006807;GO:0008152;GO:0019538;GO:0043170;GO:0044238;GO:0071704;GO:1901564	GO:0003824;GO:0008233;GO:0008236;GO:0008238;GO:0008239;GO:0016787;GO:0017171;GO:0140096		GO:0006508;GO:0006807;GO:0008152;GO:0019538;GO:0043170;GO:0044238		2	2	2	7.2	7.2	7.2	42.424	0	3.5932	4757000	9	5	A0A0R0FYU5;I1MN82;C6T8Y7	A0A0R0FYU5;I1MN82;C6T8Y7	140	GLYMA_16G130900	KRH08119;KRH08120	KRH08119;KRH08120
22.8264	22.3889	22.1634	22.2951	22.3183	22.2922	21.3252	21.1957	21.198	22.8964	22.3457	22.4416				-1		amide biosynthetic process;amide metabolic process;biosynthetic process;cellular aromatic compound metabolic process;cellular biosynthetic process;cellular component assembly;cellular component organization;cellular component organization or biogenesis;cellular metabolic process;cellular nitrogen compound biosynthetic process;cellular nitrogen compound metabolic process;cellular process;heterocyc…	binding;mRNA 5'-UTR binding;mRNA binding;nucleic acid binding;organic cyclic compound binding;RNA binding;rRNA binding;small ribosomal subunit rRNA binding;structural constituent of ribosome;structural molecule activity	cellular anatomical entity;chloroplast;cytosolic small ribosomal subunit;intracellular membrane-bounded organelle;intracellular non-membrane-bounded organelle;intracellular organelle;membrane-bounded organelle;non-membrane-bounded organelle;organelle;plastid;protein-containing complex;ribonucleoprotein complex;ribosomal subunit;ribosome;small ribosomal subunit	amide metabolic process;biosynthetic process;cellular aromatic compound metabolic process;cellular component assembly;cellular component organization;cellular component organization or biogenesis;cellular nitrogen compound metabolic process;cellular process;heterocycle metabolic process;macromolecule biosynthetic process;macromolecule metabolic process;metabolic process;nitrogen compound metaboli…	cellular anatomical entity;chloroplast;intracellular membrane-bounded organelle;intracellular non-membrane-bounded organelle;intracellular organelle;non-membrane-bounded organelle;organelle;plastid;protein-containing complex;ribonucleoprotein complex;ribosome;small ribosomal subunit		Ribosomal_S11		Chloroplast;Plastid;Referenceproteome;Ribonucleoprotein;Ribosomalprotein		GO:0000028;GO:0000462;GO:0006139;GO:0006364;GO:0006396;GO:0006412;GO:0006518;GO:0006725;GO:0006807;GO:0008152;GO:0009058;GO:0009059;GO:0009987;GO:0016043;GO:0016070;GO:0016072;GO:0019538;GO:0022607;GO:0022618;GO:0030490;GO:0034470;GO:0034641;GO:0034660;GO:0043043;GO:0043170;GO:0043603;GO:0043604;GO:0043933;GO:0044237;GO:0044238;GO:0044249;GO:0044271;GO:0046483;GO:0065003;GO:0071704;GO:0071826;GO:…	GO:0003676;GO:0003723;GO:0003729;GO:0003735;GO:0005198;GO:0005488;GO:0019843;GO:0048027;GO:0070181;GO:0097159	GO:0005840;GO:0009507;GO:0009536;GO:0015935;GO:0022627;GO:0032991;GO:0043226;GO:0043227;GO:0043228;GO:0043229;GO:0043231;GO:0043232;GO:0044391;GO:0110165;GO:1990904	GO:0006139;GO:0006364;GO:0006396;GO:0006412;GO:0006518;GO:0006725;GO:0006807;GO:0008152;GO:0009058;GO:0009059;GO:0009987;GO:0016043;GO:0016070;GO:0016072;GO:0019538;GO:0022607;GO:0022618;GO:0034641;GO:0043170;GO:0043603;GO:0044238;GO:0046483;GO:0065003;GO:0071840	GO:0005840;GO:0009507;GO:0009536;GO:0015935;GO:0032991;GO:0043226;GO:0043228;GO:0043229;GO:0043231;GO:0043232;GO:0110165;GO:1990904	6	6	6	56	56	56	16.295	0	35.732	160800000	158	0	C6SZX2;C6SV94;A0A0R0FZ23;A0A0R0KP31;A0A0R0KW03;I1M1E3;A0A0R0KP25	C6SZX2;C6SV94;A0A0R0FZ23;A0A0R0KP31;A0A0R0KW03;I1M1E3;A0A0R0KP25	141	GLYMA_03G241100;GLYMA_03G241300;GLYMA_13G217200;GLYMA_15G095300;GLYMA_19G238600;GLYMA_19G238800	KRG96881;KRG96883;KRH11201;KRH21050;KRH21051;KRH68609;KRH68610;KRH68612;KRH68613;KRH68614	KRG96881;KRG96883;KRH11201;KRH21050;KRH21051;KRH68609;KRH68610;KRH68612;KRH68613;KRH68614
16.5786	16.6392	16.8041	16.6846	16.3584	16.3803	16.7166	17.0638	17.066	15.5149	14.3933	15.8935				-1		carbohydrate derivative metabolic process;cellular metabolic process;cellular process;fructose 6-phosphate metabolic process;metabolic process;organic substance metabolic process;organophosphate metabolic process;phosphate-containing compound metabolic process;phosphorus metabolic process;photosynthesis;response to carbohydrate;response to chemical;response to glucose;response to hexose;response …	6-phosphofructokinase activity;adenyl nucleotide binding;adenyl ribonucleotide binding;anion binding;ATP binding;binding;carbohydrate derivative binding;carbohydrate kinase activity;catalytic activity;cation binding;diphosphate-fructose-6-phosphate 1-phosphotransferase activity;heterocyclic compound binding;ion binding;kinase activity;metal ion binding;nucleoside phosphate binding;nucleotide bind…	cellular anatomical entity;cytoplasm	carbohydrate derivative metabolic process;cellular process;metabolic process;phosphorus metabolic process;photosynthesis;response to chemical;response to stimulus	cellular anatomical entity;cytoplasm		PFK		Allostericenzyme;Cytoplasm;Glycolysis;Kinase;Magnesium;Metal-binding;Referenceproteome;Transferase		GO:0006002;GO:0006793;GO:0006796;GO:0008152;GO:0009743;GO:0009746;GO:0009749;GO:0009987;GO:0010033;GO:0015979;GO:0019637;GO:0034284;GO:0042221;GO:0044237;GO:0050896;GO:0071704;GO:1901135;GO:1901700	GO:0000166;GO:0003824;GO:0003872;GO:0005488;GO:0005524;GO:0008443;GO:0016301;GO:0016740;GO:0016772;GO:0016773;GO:0017076;GO:0019200;GO:0030554;GO:0032553;GO:0032555;GO:0032559;GO:0035639;GO:0036094;GO:0043167;GO:0043168;GO:0043169;GO:0046872;GO:0047334;GO:0097159;GO:0097367;GO:1901265;GO:1901363	GO:0005737;GO:0110165	GO:0006793;GO:0008152;GO:0009987;GO:0015979;GO:0042221;GO:0050896;GO:1901135	GO:0005737;GO:0110165	1	1	1	5.1	5.1	5.1	57.942	0.0016097	2.1931	994060	7	2	A0A0R0FZ92;I1MFL2;I1KZW7	A0A0R0FZ92;I1MFL2;I1KZW7	142	GLYMA_09G007900;GLYMA_15G112300	KRH11497;KRH11498;KRH36515	KRH11497;KRH11498;KRH36515
19.0031	15.3825	17.5162	15.0249	15.389	17.7404	16.9914	15.7298	17.4935	19.2926	18.0881	18.0607				-1			active monoatomic ion transmembrane transporter activity;active transmembrane transporter activity;ATP-dependent activity;ATPase activity, coupled to transmembrane movement of ions, rotational mechanism;ATPase-coupled ion transmembrane transporter activity;ATPase-coupled monoatomic cation transmembrane transporter activity;ATPase-coupled transmembrane transporter activity;inorganic cation transme…	membrane protein complex;protein-containing complex;proton-transporting two-sector ATPase complex, catalytic domain;proton-transporting V-type ATPase, V1 domain;vacuolar proton-transporting V-type ATPase, V1 domain		membrane protein complex;protein-containing complex		V-ATPase_H_C;V-ATPase_H_N		Hydrogeniontransport;Iontransport;Referenceproteome;Repeat;Transport			GO:0005215;GO:0008324;GO:0015075;GO:0015078;GO:0015318;GO:0015399;GO:0019829;GO:0022804;GO:0022853;GO:0022857;GO:0022890;GO:0042625;GO:0042626;GO:0044769;GO:0046961;GO:0140657	GO:0000221;GO:0032991;GO:0033178;GO:0033180;GO:0098796		GO:0032991;GO:0098796	3	3	3	10.5	10.5	10.5	51.004	0	23.619	3230000	10	5	A0A0R0G0K3;A0A0R0KZD7	A0A0R0G0K3;A0A0R0KZD7	144	GLYMA_02G059800;GLYMA_16G142600	KRH08325;KRH69963	KRH08325;KRH69963
22.4307	21.8309	22.3708	22.257	22.2747	21.2643	21.6916	22.1233	22.1255	21.3701	19.5668	22.1679				-1		macromolecule metabolic process;metabolic process;nitrogen compound metabolic process;organic substance metabolic process;organonitrogen compound metabolic process;primary metabolic process;protein metabolic process;proteolysis	aspartic-type endopeptidase activity;aspartic-type peptidase activity;catalytic activity;catalytic activity, acting on a protein;endopeptidase activity;hydrolase activity;peptidase activity		macromolecule metabolic process;metabolic process;nitrogen compound metabolic process;primary metabolic process;protein metabolic process;proteolysis			TAXi_C;TAXi_N		Referenceproteome;Signal		GO:0006508;GO:0006807;GO:0008152;GO:0019538;GO:0043170;GO:0044238;GO:0071704;GO:1901564	GO:0003824;GO:0004175;GO:0004190;GO:0008233;GO:0016787;GO:0070001;GO:0140096		GO:0006508;GO:0006807;GO:0008152;GO:0019538;GO:0043170;GO:0044238		4	4	4	12.2	12.2	12.2	45.028	0	19.545	51906000	42	0	A0A0R0G0P5;A0A0R0GAQ0;K7LBC0;A0A0R0I2C1	A0A0R0G0P5;A0A0R0GAQ0;K7LBC0;A0A0R0I2C1	145	GLYMA_09G017900;GLYMA_15G123800	KRH11684;KRH11685;KRH11686;KRH11687;KRH36687;KRH36688	KRH11684;KRH11685;KRH11686;KRH11687;KRH36687;KRH36688
20.5233	20.8907	20.3343	19.9905	20.3866	20.4234	19.6935	16.79	15.9313	20.8485	19.7926	20.5659				-1		amide biosynthetic process;amide metabolic process;biosynthetic process;cellular biosynthetic process;cellular metabolic process;cellular nitrogen compound biosynthetic process;cellular nitrogen compound metabolic process;cellular process;macromolecule biosynthetic process;macromolecule metabolic process;metabolic process;nitrogen compound metabolic process;organic substance biosynthetic process;…	binding;nucleic acid binding;organic cyclic compound binding;RNA binding;structural constituent of ribosome;structural molecule activity	cellular anatomical entity;cytoplasm;cytosolic small ribosomal subunit;intracellular membrane-bounded organelle;intracellular organelle;membrane-bounded organelle;nucleus;organelle;protein-containing complex;ribonucleoprotein complex;ribosomal subunit;small ribosomal subunit	amide metabolic process;biosynthetic process;cellular nitrogen compound metabolic process;cellular process;macromolecule biosynthetic process;macromolecule metabolic process;metabolic process;nitrogen compound metabolic process;peptide metabolic process;primary metabolic process;protein metabolic process;translation	cellular anatomical entity;cytoplasm;intracellular membrane-bounded organelle;intracellular organelle;nucleus;organelle;protein-containing complex;ribonucleoprotein complex;small ribosomal subunit		KH_2;Ribosomal_S3_C		Referenceproteome;Ribonucleoprotein;Ribosomalprotein;RNA-binding		GO:0006412;GO:0006518;GO:0006807;GO:0008152;GO:0009058;GO:0009059;GO:0009987;GO:0019538;GO:0034641;GO:0043043;GO:0043170;GO:0043603;GO:0043604;GO:0044237;GO:0044238;GO:0044249;GO:0044271;GO:0071704;GO:1901564;GO:1901566;GO:1901576	GO:0003676;GO:0003723;GO:0003735;GO:0005198;GO:0005488;GO:0097159	GO:0005634;GO:0005737;GO:0015935;GO:0022627;GO:0032991;GO:0043226;GO:0043227;GO:0043229;GO:0043231;GO:0044391;GO:0110165;GO:1990904	GO:0006412;GO:0006518;GO:0006807;GO:0008152;GO:0009058;GO:0009059;GO:0009987;GO:0019538;GO:0034641;GO:0043170;GO:0043603;GO:0044238	GO:0005634;GO:0005737;GO:0015935;GO:0032991;GO:0043226;GO:0043229;GO:0043231;GO:0110165;GO:1990904	12	1	1	53.2	5.5	5.5	26.182	0	9.9931	14240000	14	2	I1MQB5;C6TG91;A0A0R0G342;C6TC41;C6TAZ8;C6TB87	I1MQB5;C6TG91;A0A0R0G342;C6TC41;C6TAZ8;C6TB87	147	GLYMA_09G156600;GLYMA_16G207300;GLYMA_16G207400	KRH09269;KRH09270;KRH38770;KRH38771	KRH09269;KRH09270;KRH38770;KRH38771
22.643	22.6046	23.2791	22.733	23.193	22.8403	22.7922	22.6413	22.6436	22.5362	22.4363	22.5888				-1		amide biosynthetic process;amide metabolic process;biosynthetic process;cellular biosynthetic process;cellular metabolic process;cellular nitrogen compound biosynthetic process;cellular nitrogen compound metabolic process;cellular process;macromolecule biosynthetic process;macromolecule metabolic process;metabolic process;nitrogen compound metabolic process;organic substance biosynthetic process;…	structural constituent of ribosome;structural molecule activity	cellular anatomical entity;cytosolic small ribosomal subunit;intracellular non-membrane-bounded organelle;intracellular organelle;non-membrane-bounded organelle;organelle;protein-containing complex;ribonucleoprotein complex;ribosomal subunit;ribosome;small ribosomal subunit	amide metabolic process;biosynthetic process;cellular nitrogen compound metabolic process;cellular process;macromolecule biosynthetic process;macromolecule metabolic process;metabolic process;nitrogen compound metabolic process;peptide metabolic process;primary metabolic process;protein metabolic process;translation	cellular anatomical entity;intracellular non-membrane-bounded organelle;intracellular organelle;non-membrane-bounded organelle;organelle;protein-containing complex;ribonucleoprotein complex;ribosome;small ribosomal subunit		Ribosomal_L7Ae		Referenceproteome;Ribonucleoprotein;Ribosomalprotein		GO:0006412;GO:0006518;GO:0006807;GO:0008152;GO:0009058;GO:0009059;GO:0009987;GO:0019538;GO:0034641;GO:0043043;GO:0043170;GO:0043603;GO:0043604;GO:0044237;GO:0044238;GO:0044249;GO:0044271;GO:0071704;GO:1901564;GO:1901566;GO:1901576	GO:0003735;GO:0005198	GO:0005840;GO:0015935;GO:0022627;GO:0032991;GO:0043226;GO:0043228;GO:0043229;GO:0043232;GO:0044391;GO:0110165;GO:1990904	GO:0006412;GO:0006518;GO:0006807;GO:0008152;GO:0009058;GO:0009059;GO:0009987;GO:0019538;GO:0034641;GO:0043170;GO:0043603;GO:0044238	GO:0005840;GO:0015935;GO:0032991;GO:0043226;GO:0043228;GO:0043229;GO:0043232;GO:0110165;GO:1990904	7	7	1	59.3	59.3	6.4	14.897	0	83.874	317440000	220	0	I1KVL0;C6SW79;C6T064;C6SVV7;A0A0R0G3G4;K7L817;I1KVK9;K7M5T0	I1KVL0;C6SW79;C6T064;C6SVV7;A0A0R0G3G4;K7L817	148	GLYMA_08G217700;GLYMA_13G369700;GLYMA_15G003700	KRH09658;KRH09659;KRH23635;KRH44540;KRH44541;KRH44542;KRH44543	KRH09658;KRH09659;KRH23635;KRH44540;KRH44541;KRH44542;KRH44543
17.6352	16.7305	16.5664	16.7322	16.2241	16.9818	16.2456	18.6358	18.638	19.4262	18.4614	17.2872				-1		amino acid biosynthetic process;amino acid metabolic process;aromatic amino acid family biosynthetic process;aromatic amino acid metabolic process;aromatic compound biosynthetic process;biosynthetic process;carboxylic acid biosynthetic process;carboxylic acid metabolic process;cellular aromatic compound metabolic process;cellular biosynthetic process;cellular metabolic process;cellular process;ch…	3-deoxy-7-phosphoheptulonate synthase activity;catalytic activity;transferase activity;transferase activity, transferring alkyl or aryl (other than methyl) groups	cellular anatomical entity;chloroplast;intracellular membrane-bounded organelle;intracellular organelle;membrane-bounded organelle;organelle;plastid	amino acid metabolic process;biosynthetic process;cellular aromatic compound metabolic process;cellular process;metabolic process;nitrogen compound metabolic process;organic acid metabolic process;primary metabolic process;small molecule metabolic process	cellular anatomical entity;chloroplast;intracellular membrane-bounded organelle;intracellular organelle;organelle;plastid		DAHP_synth_2		Amino-acidbiosynthesis;Aromaticaminoacidbiosynthesis;Cadmium;Chloroplast;Cobalt;Manganese;Plastid;Referenceproteome;Transferase;Transitpeptide		GO:0006082;GO:0006520;GO:0006725;GO:0006807;GO:0008152;GO:0008652;GO:0009058;GO:0009072;GO:0009073;GO:0009423;GO:0009987;GO:0016053;GO:0019438;GO:0019752;GO:0043436;GO:0043648;GO:0043650;GO:0044237;GO:0044238;GO:0044249;GO:0044281;GO:0044283;GO:0046394;GO:0046417;GO:0071704;GO:1901360;GO:1901362;GO:1901564;GO:1901566;GO:1901576	GO:0003824;GO:0003849;GO:0016740;GO:0016765	GO:0009507;GO:0009536;GO:0043226;GO:0043227;GO:0043229;GO:0043231;GO:0110165	GO:0006082;GO:0006520;GO:0006725;GO:0006807;GO:0008152;GO:0009058;GO:0009987;GO:0044238;GO:0044281	GO:0009507;GO:0009536;GO:0043226;GO:0043229;GO:0043231;GO:0110165	4	1	1	10.7	2.8	2.8	54.907	0	5.7962	3108700	4	3	A0A0R0G3L8	A0A0R0G3L8	149	GLYMA_15G054700	KRH10562	KRH10562
16.9523	17.9961	18.5935	18.7249	18.5754	18.3076	19.2699	18.1654	18.1676	17.0419	15.7519	17.4962				-1			nutrient reservoir activity	cellular anatomical entity;endoplasmic reticulum;intracellular membrane-bounded organelle;intracellular organelle;membrane-bounded organelle;organelle;plant-type vacuole;protein storage vacuole;storage vacuole;vacuole		cellular anatomical entity;endoplasmic reticulum;intracellular membrane-bounded organelle;intracellular organelle;organelle;vacuole		Cupin_1		Disulfidebond;Endoplasmicreticulum;Referenceproteome;Seedstorageprotein;Signal;Storageprotein;Vacuole			GO:0045735	GO:0000322;GO:0000325;GO:0000326;GO:0005773;GO:0005783;GO:0043226;GO:0043227;GO:0043229;GO:0043231;GO:0110165		GO:0005773;GO:0005783;GO:0043226;GO:0043229;GO:0043231;GO:0110165	2	2	2	8.7	8.7	8.7	38.319	0	9.7915	4832300	42	0	C6TGN6;A0A0R0G3Z6;K7M3B0;A0A0R0G6Y4	C6TGN6;A0A0R0G3Z6;K7M3B0;A0A0R0G6Y4	151	GLYMA_13G332200;GLYMA_15G042100	KRH10323;KRH10324;KRH22992	KRH10323;KRH10324;KRH22992
15.1852	15.7011	15.4807	15.8511	15.442	16.091	15.6852	15.5274	15.5118	14.6955	15.194	14.8462				-1								Copine;zf-C3HC4_3		Metal-binding;Referenceproteome;Zinc;Zinc-finger							1	1	1	6.2	6.2	6.2	35.458	0	4.5623	713930	41	0	I1KW43;A0A0R0G4C2;A0A0R0G4M8;A0A0R0GE15;A0A0R0G4C4;I1KW41;A0A0R0IN04	I1KW43;A0A0R0G4C2;A0A0R0G4M8;A0A0R0GE15;A0A0R0G4C4;I1KW41;A0A0R0IN04	152	GLYMA_08G163000;GLYMA_08G234200;GLYMA_15G219300	KRH13146;KRH13147;KRH13148;KRH13149;KRH13150;KRH43661;KRH44829;KRH44830;KRH44831;KRH44832	KRH13146;KRH13147;KRH13148;KRH13149;KRH13150;KRH43661;KRH44829;KRH44830;KRH44831;KRH44832
23.8134	23.4376	23.3442	23.9422	23.2026	23.4664	23.681	24.8686	24.8708	24.618	25.2963	24.3323				-1		biosynthetic process;carboxylic acid biosynthetic process;carboxylic acid metabolic process;cellular biosynthetic process;cellular lipid metabolic process;cellular metabolic process;cellular process;fatty acid biosynthetic process;fatty acid metabolic process;lipid biosynthetic process;lipid metabolic process;lipid modification;lipid oxidation;metabolic process;monocarboxylic acid biosynthetic pr…	binding;catalytic activity;cation binding;dioxygenase activity;ion binding;metal ion binding;oxidoreductase activity;oxidoreductase activity, acting on single donors with incorporation of molecular oxygen;oxidoreductase activity, acting on single donors with incorporation of molecular oxygen, incorporation of two atoms of oxygen	cellular anatomical entity;cytoplasm	biosynthetic process;cellular lipid metabolic process;cellular process;lipid metabolic process;metabolic process;monocarboxylic acid metabolic process;organic acid metabolic process;primary metabolic process;small molecule metabolic process	cellular anatomical entity;cytoplasm		Lipoxygenase;PLAT		Cytoplasm;Dioxygenase;Fattyacidbiosynthesis;Fattyacidmetabolism;Iron;Lipidbiosynthesis;Lipidmetabolism;Metal-binding;Oxidoreductase;Oxylipinbiosynthesis;Referenceproteome		GO:0006082;GO:0006629;GO:0006631;GO:0006633;GO:0008152;GO:0008610;GO:0009058;GO:0009987;GO:0016053;GO:0019752;GO:0030258;GO:0031407;GO:0031408;GO:0032787;GO:0034440;GO:0043436;GO:0044237;GO:0044238;GO:0044249;GO:0044255;GO:0044281;GO:0044283;GO:0046394;GO:0071704;GO:0072330;GO:1901576	GO:0003824;GO:0005488;GO:0016491;GO:0016701;GO:0016702;GO:0043167;GO:0043169;GO:0046872;GO:0051213	GO:0005737;GO:0110165	GO:0006082;GO:0006629;GO:0008152;GO:0009058;GO:0009987;GO:0032787;GO:0044238;GO:0044255;GO:0044281	GO:0005737;GO:0110165	47	47	0	54.2	54.2	0	96.641	0	323.31	3.5697e+09	1650	0	A0A0R0G554;A0A0R0K016;A0A0R0KDG4;A0A0R0KHI0;A0A0R0G523;Q42781;I1KWX3;K7L927;A0A0R0G0B2;A0A0R0IT41;I1NGD1;I1NGD0;K7MFX1;I1JMA5;I1LE57;K7L2F8;I1KS01;Q39829	A0A0R0G554	154	GLYMA_15G026500	KRH10053	KRH10053
23.0923	23.3369	23.8781	23.7768	23.5438	23.6775	23.8819	24.5216	24.5238	21.2243	21.3147	23.7337				-1		ADP catabolic process;ADP metabolic process;alcohol catabolic process;alcohol metabolic process;aldehyde biosynthetic process;alditol catabolic process;alditol metabolic process;aromatic compound catabolic process;ATP metabolic process;biosynthetic process;carbohydrate biosynthetic process;carbohydrate catabolic process;carbohydrate derivative biosynthetic process;carbohydrate derivative cataboli…	catalytic activity;intramolecular oxidoreductase activity;intramolecular oxidoreductase activity, interconverting aldoses and ketoses;isomerase activity;triose-phosphate isomerase activity	cellular anatomical entity;cytosol	alcohol metabolic process;biosynthetic process;carbohydrate derivative metabolic process;carbohydrate metabolic process;catabolic process;cellular aldehyde metabolic process;cellular aromatic compound metabolic process;cellular nitrogen compound metabolic process;cellular process;generation of precursor metabolites and energy;heterocycle metabolic process;metabolic process;monocarboxylic acid met…	cellular anatomical entity;cytosol		TIM		Isomerase;Referenceproteome		GO:0005975;GO:0005996;GO:0006006;GO:0006066;GO:0006071;GO:0006081;GO:0006082;GO:0006090;GO:0006091;GO:0006094;GO:0006096;GO:0006139;GO:0006163;GO:0006195;GO:0006725;GO:0006753;GO:0006793;GO:0006796;GO:0006807;GO:0008152;GO:0009056;GO:0009058;GO:0009117;GO:0009132;GO:0009134;GO:0009135;GO:0009137;GO:0009141;GO:0009144;GO:0009150;GO:0009154;GO:0009166;GO:0009179;GO:0009181;GO:0009185;GO:0009191;GO:…	GO:0003824;GO:0004807;GO:0016853;GO:0016860;GO:0016861	GO:0005829;GO:0110165	GO:0005975;GO:0006066;GO:0006081;GO:0006082;GO:0006090;GO:0006091;GO:0006139;GO:0006725;GO:0006793;GO:0006807;GO:0008152;GO:0009056;GO:0009058;GO:0009117;GO:0009987;GO:0032787;GO:0034641;GO:0034655;GO:0044238;GO:0044281;GO:0046483;GO:0055086;GO:1901135	GO:0005829;GO:0110165	16	3	3	86.2	26.9	26.9	27.198	0	65.805	204030000	378	0	A0A0R0G6T3;C6TKJ5;C6T6J1	A0A0R0G6T3;C6TKJ5;C6T6J1	155	GLYMA_15G038100	KRH10260	KRH10260
21.7909	19.9583	20.6663	20.2707	20.7172	20.8399	20.5491	21.7182	21.7204	21.1767	22.133	21.2309				-1		aromatic compound biosynthetic process;biosynthetic process;cellular aromatic compound metabolic process;cellular biosynthetic process;cellular metabolic process;cellular nitrogen compound biosynthetic process;cellular nitrogen compound metabolic process;cellular process;chlorophyll biosynthetic process;chlorophyll metabolic process;heterocycle biosynthetic process;heterocycle metabolic process;m…	binding;catalytic activity;coproporphyrinogen oxidase activity;identical protein binding;oxidoreductase activity;oxidoreductase activity, acting on the CH-CH group of donors;oxidoreductase activity, acting on the CH-CH group of donors, oxygen as acceptor;protein binding;protein dimerization activity;protein homodimerization activity	cellular anatomical entity;chloroplast;cytoplasm;intracellular membrane-bounded organelle;intracellular organelle;membrane-bounded organelle;organelle;plastid	biosynthetic process;cellular aromatic compound metabolic process;cellular nitrogen compound metabolic process;cellular process;heterocycle metabolic process;metabolic process;nitrogen compound metabolic process;pigment metabolic process;tetrapyrrole metabolic process	cellular anatomical entity;chloroplast;cytoplasm;intracellular membrane-bounded organelle;intracellular organelle;organelle;plastid		Coprogen_oxidas		Chlorophyllbiosynthesis;Chloroplast;Hemebiosynthesis;Oxidoreductase;Plastid;Porphyrinbiosynthesis;Referenceproteome;Transitpeptide		GO:0006725;GO:0006778;GO:0006779;GO:0006782;GO:0006807;GO:0008152;GO:0009058;GO:0009987;GO:0015994;GO:0015995;GO:0018130;GO:0019438;GO:0033013;GO:0033014;GO:0034641;GO:0042440;GO:0044237;GO:0044249;GO:0044271;GO:0046148;GO:0046483;GO:0046501;GO:0071704;GO:1901360;GO:1901362;GO:1901564;GO:1901566;GO:1901576	GO:0003824;GO:0004109;GO:0005488;GO:0005515;GO:0016491;GO:0016627;GO:0016634;GO:0042802;GO:0042803;GO:0046983	GO:0005737;GO:0009507;GO:0009536;GO:0043226;GO:0043227;GO:0043229;GO:0043231;GO:0110165	GO:0006725;GO:0006807;GO:0008152;GO:0009058;GO:0009987;GO:0033013;GO:0034641;GO:0042440;GO:0046483	GO:0005737;GO:0009507;GO:0009536;GO:0043226;GO:0043229;GO:0043231;GO:0110165	9	9	9	27.5	27.5	27.5	43.221	0	117.76	80922000	91	0	A0A0R0G797;P35055;I1M654	A0A0R0G797;P35055;I1M654	156	GLYMA_14G003200	KRH14044;KRH14045	KRH14044;KRH14045
21.8469	22.6408	22.6393	22.9346	23.0462	22.606	22.3867	22.2166	22.2188	21.4061	21.9687	22.2546				-1				cellular anatomical entity;membrane;plasma membrane		cellular anatomical entity;membrane;plasma membrane		Fasciclin		Referenceproteome;Signal				GO:0005886;GO:0016020;GO:0110165		GO:0005886;GO:0016020;GO:0110165	2	2	2	10.2	10.2	10.2	27.234	0	10.636	74450000	62	0	C6SVG6;A0A0R0G7B7	C6SVG6;A0A0R0G7B7	157	GLYMA_14G005300	KRH14074	KRH14074
20.7948	22.3955	22.2233	22.0863	22.3816	22.5003	21.9802	19.6207	20.164	21.3244	14.6143	22.2637				-1		establishment of localization;lipid transport;localization;organic substance transport;transport	binding;lipid binding	cellular anatomical entity;membrane;plasma membrane	establishment of localization;lipid transport;localization;transport	cellular anatomical entity;membrane;plasma membrane		LTP_2		Cellmembrane;Disulfidebond;Glycoprotein;GPI-anchor;Lipoprotein;Membrane;Referenceproteome;Signal;Transmembrane;Transmembranehelix;Transport		GO:0006810;GO:0006869;GO:0051179;GO:0051234;GO:0071702	GO:0005488;GO:0008289	GO:0005886;GO:0016020;GO:0110165	GO:0006810;GO:0006869;GO:0051179;GO:0051234	GO:0005886;GO:0016020;GO:0110165	2	2	2	13.3	13.3	13.3	12.908	0	3.5836	60682000	31	1	A0A0R0G7L1;I1MDV5	A0A0R0G7L1;I1MDV5	158	GLYMA_15G052200	KRH10510;KRH10511	KRH10510;KRH10511
20.4938	19.3637	20.4711	19.9288	20.7057	20.5187	19.5787	20.9452	20.9474	21.3064	20.7423	20.5233				-1		acetyl-CoA biosynthetic process;acetyl-CoA biosynthetic process from pyruvate;acetyl-CoA metabolic process;acyl-CoA biosynthetic process;acyl-CoA metabolic process;amide biosynthetic process;amide metabolic process;aromatic compound biosynthetic process;biosynthetic process;carbohydrate derivative biosynthetic process;carbohydrate derivative metabolic process;carboxylic acid metabolic process;cel…	catalytic activity;oxidoreductase activity;oxidoreductase activity, acting on the aldehyde or oxo group of donors;oxidoreductase activity, acting on the aldehyde or oxo group of donors, disulfide as acceptor;pyruvate dehydrogenase (acetyl-transferring) activity;pyruvate dehydrogenase activity	catalytic complex;mitochondrial protein-containing complex;mitochondrial pyruvate dehydrogenase complex;oxidoreductase complex;protein-containing complex;pyruvate dehydrogenase complex	amide metabolic process;biosynthetic process;carbohydrate derivative metabolic process;cellular aromatic compound metabolic process;cellular nitrogen compound metabolic process;cellular process;heterocycle metabolic process;metabolic process;monocarboxylic acid metabolic process;nitrogen compound metabolic process;nucleobase-containing compound metabolic process;nucleobase-containing small molecu…	catalytic complex;oxidoreductase complex;protein-containing complex;pyruvate dehydrogenase complex		Transket_pyr;Transketolase_C		Oxidoreductase;Pyruvate;Referenceproteome;Thiaminepyrophosphate		GO:0006082;GO:0006084;GO:0006085;GO:0006086;GO:0006090;GO:0006139;GO:0006163;GO:0006164;GO:0006637;GO:0006725;GO:0006753;GO:0006790;GO:0006793;GO:0006796;GO:0006807;GO:0008152;GO:0009058;GO:0009117;GO:0009150;GO:0009152;GO:0009165;GO:0009259;GO:0009260;GO:0009987;GO:0018130;GO:0019438;GO:0019637;GO:0019693;GO:0019752;GO:0032787;GO:0033865;GO:0033866;GO:0033875;GO:0034030;GO:0034032;GO:0034033;GO:…	GO:0003824;GO:0004738;GO:0004739;GO:0016491;GO:0016624;GO:0016903	GO:0005967;GO:0032991;GO:0045254;GO:0098798;GO:1902494;GO:1990204	GO:0006082;GO:0006090;GO:0006139;GO:0006725;GO:0006790;GO:0006793;GO:0006807;GO:0008152;GO:0009058;GO:0009117;GO:0009987;GO:0032787;GO:0034641;GO:0043603;GO:0044238;GO:0044281;GO:0046483;GO:0055086;GO:1901135	GO:0032991;GO:0045254;GO:1902494;GO:1990204	4	4	4	13	13	13	37.971	0	42.343	38285000	41	0	A0A0R0G869;I1M6N5;I1JJD2;C6T902;C6T827	A0A0R0G869;I1M6N5;I1JJD2;C6T902;C6T827	159	GLYMA_02G294500;GLYMA_14G020200;GLYMA_14G186900	KRH14335;KRH14336;KRH14337;KRH14338;KRH14339;KRH14340;KRH14341;KRH14342;KRH16933;KRH16934;KRH16935;KRH73802;KRH73803	KRH14335;KRH14336;KRH14337;KRH14338;KRH14339;KRH14340;KRH14341;KRH14342;KRH16933;KRH16934;KRH16935;KRH73802;KRH73803
22.0958	21.156	21.4173	20.9884	20.5163	21.3262	20.4956	22.2402	22.2424	22.2612	14.8124	22.0517				-1			binding;catalytic activity;cation binding;hydrolase activity;hydrolase activity, acting on ester bonds;ion binding;metal ion binding;phosphatase activity;phosphoglycolate phosphatase activity;phosphoric ester hydrolase activity					Hydrolase_6;Hydrolase_like		Hydrolase;Magnesium;Metal-binding;Referenceproteome			GO:0003824;GO:0005488;GO:0008967;GO:0016787;GO:0016788;GO:0016791;GO:0042578;GO:0043167;GO:0043169;GO:0046872				2	1	1	8.9	3.8	3.8	26.347	0	5.2556	40459000	28	1	A0A0R0I8C1;A0A0R0I931;C6SXF1;K7LBA1;A0A0R0G8D0	A0A0R0I8C1;A0A0R0I931;C6SXF1;K7LBA1;A0A0R0G8D0	160	GLYMA_09G015500;GLYMA_15G121300	KRH11624;KRH36628;KRH36629;KRH36630;KRH36631;KRH36632;KRH36633;KRH36634	KRH11624;KRH36628;KRH36629;KRH36630;KRH36631;KRH36632;KRH36633;KRH36634
17.1448	17.8821	17.7356	17.4941	17.4552	17.8417	16.6405	15.0036	16.6971	17.8627	16.4085	16.9372				-1		cell cycle process;cellular component organization;cellular component organization or biogenesis;cellular process;cytokinesis;cytokinesis by cell plate formation;cytoskeleton organization;microtubule cytoskeleton organization;microtubule-based process;organelle organization	binding;cytoskeletal protein binding;microtubule binding;protein binding;tubulin binding	cellular anatomical entity;cytoplasm;cytoskeleton;intracellular non-membrane-bounded organelle;intracellular organelle;non-membrane-bounded organelle;organelle;spindle	cellular component organization;cellular component organization or biogenesis;cellular process;cytokinesis;cytoskeleton organization;microtubule cytoskeleton organization;microtubule-based process;organelle organization	cellular anatomical entity;cytoplasm;cytoskeleton;intracellular non-membrane-bounded organelle;intracellular organelle;non-membrane-bounded organelle;organelle		MAP65_ASE1		Coiledcoil;Cytoplasm;Cytoskeleton;Referenceproteome		GO:0000226;GO:0000910;GO:0000911;GO:0006996;GO:0007010;GO:0007017;GO:0009987;GO:0016043;GO:0022402;GO:0071840	GO:0005488;GO:0005515;GO:0008017;GO:0008092;GO:0015631	GO:0005737;GO:0005819;GO:0005856;GO:0043226;GO:0043228;GO:0043229;GO:0043232;GO:0110165	GO:0000226;GO:0000910;GO:0006996;GO:0007010;GO:0007017;GO:0009987;GO:0016043;GO:0071840	GO:0005737;GO:0005856;GO:0043226;GO:0043228;GO:0043229;GO:0043232;GO:0110165	2	2	2	5.2	5.2	5.2	65.301	0	19.496	1975300	10	2	A0A0R4J2T3;A0A0R0GGZ9;A0A0R0G8J2;K7M4F5	A0A0R4J2T3;A0A0R0GGZ9;A0A0R0G8J2;K7M4F5	161	GLYMA_02G295100;GLYMA_14G018300;GLYMA_14G018500	KRH14311;KRH14312;KRH14313;KRH14315;KRH73815;KRH73816	KRH14311;KRH14312;KRH14313;KRH14315;KRH73815;KRH73816
20.7157	22.6186	21.7712	22.8667	22.0129	22.6472	22.7082	23.0709	23.0731	21.2795	22.4625	22.6462				-1		biological regulation;negative regulation of biological process;negative regulation of catalytic activity;negative regulation of hydrolase activity;negative regulation of macromolecule metabolic process;negative regulation of metabolic process;negative regulation of molecular function;negative regulation of nitrogen compound metabolic process;negative regulation of peptidase activity;negative reg…	cysteine-type endopeptidase inhibitor activity;endopeptidase inhibitor activity;endopeptidase regulator activity;enzyme inhibitor activity;enzyme regulator activity;molecular function inhibitor activity;molecular function regulator activity;peptidase inhibitor activity;peptidase regulator activity		biological regulation;regulation of biological process;regulation of catalytic activity;regulation of metabolic process;regulation of molecular function			SQAPI		Proteaseinhibitor;Referenceproteome;Thiolproteaseinhibitor		GO:0009892;GO:0010466;GO:0010605;GO:0019222;GO:0030162;GO:0043086;GO:0044092;GO:0045861;GO:0048519;GO:0050789;GO:0050790;GO:0051171;GO:0051172;GO:0051246;GO:0051248;GO:0051336;GO:0051346;GO:0052547;GO:0060255;GO:0065007;GO:0065009;GO:0080090	GO:0004857;GO:0004866;GO:0004869;GO:0030234;GO:0030414;GO:0061134;GO:0061135;GO:0098772;GO:0140678		GO:0019222;GO:0050789;GO:0050790;GO:0065007;GO:0065009		9	3	3	48	16.5	16.5	22.515	0	12.54	80608000	49	0	A0A0R0G8Z2;Q39841	A0A0R0G8Z2	162	GLYMA_14G038300	KRH14630	KRH14630
16.1871	14.835	16.0377	16.6217	16.7977	16.2352	15.4705	16.959	15.6145	15.5124	17.794	16.9271				-1		macromolecule metabolic process;metabolic process;nitrogen compound metabolic process;organic substance metabolic process;organonitrogen compound metabolic process;primary metabolic process;protein metabolic process;proteolysis	carboxypeptidase activity;catalytic activity;catalytic activity, acting on a protein;exopeptidase activity;hydrolase activity;peptidase activity;serine hydrolase activity;serine-type carboxypeptidase activity;serine-type exopeptidase activity;serine-type peptidase activity	cellular anatomical entity;extracellular region;intracellular membrane-bounded organelle;intracellular organelle;membrane-bounded organelle;organelle;vacuole	macromolecule metabolic process;metabolic process;nitrogen compound metabolic process;primary metabolic process;protein metabolic process;proteolysis	cellular anatomical entity;extracellular region;intracellular membrane-bounded organelle;intracellular organelle;organelle;vacuole		Peptidase_S10		Carboxypeptidase;Hydrolase;Protease;Referenceproteome;Secreted;Signal		GO:0006508;GO:0006807;GO:0008152;GO:0019538;GO:0043170;GO:0044238;GO:0071704;GO:1901564	GO:0003824;GO:0004180;GO:0004185;GO:0008233;GO:0008236;GO:0008238;GO:0016787;GO:0017171;GO:0070008;GO:0140096	GO:0005576;GO:0005773;GO:0043226;GO:0043227;GO:0043229;GO:0043231;GO:0110165	GO:0006508;GO:0006807;GO:0008152;GO:0019538;GO:0043170;GO:0044238	GO:0005576;GO:0005773;GO:0043226;GO:0043229;GO:0043231;GO:0110165	1	1	1	3.1	3.1	3.1	52.684	0	3.2928	485590	1	9	A0A0R0G945;I1MGT5	A0A0R0G945;I1MGT5	163	GLYMA_15G156200	KRH12163;KRH12164	KRH12163;KRH12164
15.4103	19.0342	18.7699	19.1851	18.834	19.3498	19.1088	18.8651	18.8674	15.752	18.0092	19.0487				-1		lipid metabolic process;macromolecule metabolic process;metabolic process;nitrogen compound metabolic process;organic substance metabolic process;organonitrogen compound metabolic process;primary metabolic process;protein metabolic process;proteolysis	aspartic-type endopeptidase activity;aspartic-type peptidase activity;catalytic activity;catalytic activity, acting on a protein;endopeptidase activity;hydrolase activity;peptidase activity		lipid metabolic process;macromolecule metabolic process;metabolic process;nitrogen compound metabolic process;primary metabolic process;protein metabolic process;proteolysis			Asp;SapB_1;SapB_2		Aspartylprotease;Disulfidebond;Hydrolase;Protease;Referenceproteome;Signal		GO:0006508;GO:0006629;GO:0006807;GO:0008152;GO:0019538;GO:0043170;GO:0044238;GO:0071704;GO:1901564	GO:0003824;GO:0004175;GO:0004190;GO:0008233;GO:0016787;GO:0070001;GO:0140096		GO:0006508;GO:0006629;GO:0006807;GO:0008152;GO:0019538;GO:0043170;GO:0044238		1	1	1	1.8	1.8	1.8	55.241	0.0039078	1.9433	5017100	18	2	I1MFJ1;I1KZU7;A0A0R0GA69	I1MFJ1;I1KZU7;A0A0R0GA69	164	GLYMA_09G005600;GLYMA_15G110200	KRH11470;KRH11471;KRH36484	KRH11470;KRH11471;KRH36484
18.6801	19.3205	17.701	17.7711	17.2188	18.0654	17.7748	18.7423	18.7445	19.1794	16.7177	18.727				-1		response to abiotic stimulus;response to acid chemical;response to chemical;response to inorganic substance;response to organic substance;response to oxygen-containing compound;response to salt;response to stimulus;response to stress;response to water;response to water deprivation	channel activity;inorganic molecular entity transmembrane transporter activity;passive transmembrane transporter activity;salt transmembrane transporter activity;transmembrane transporter activity;transporter activity;water channel activity;water transmembrane transporter activity	cellular anatomical entity;membrane;plasma membrane	response to abiotic stimulus;response to chemical;response to stimulus;response to stress	cellular anatomical entity;membrane;plasma membrane		MIP		Membrane;Referenceproteome;Transmembrane;Transmembranehelix;Transport		GO:0001101;GO:0006950;GO:0009414;GO:0009415;GO:0009628;GO:0010033;GO:0010035;GO:0042221;GO:0050896;GO:1901700;GO:1902074	GO:0005215;GO:0005372;GO:0015250;GO:0015267;GO:0015318;GO:0022803;GO:0022857;GO:1901702	GO:0005886;GO:0016020;GO:0110165	GO:0006950;GO:0009628;GO:0042221;GO:0050896	GO:0005886;GO:0016020;GO:0110165	3	3	3	13	13	13	27.551	0	7.1591	6403300	18	0	A0A0R0L1G2;A0A0R0GIN2;A0A0R0L896;A0A0R0GAK0;A0A0R0LB64;I1M7W9;C6TEZ8;I1JI64;K7MPL6;A0A0R0LIP5;C6TAR6;A0A0R0KNM9;A0A0R0L9X7	A0A0R0L1G2;A0A0R0GIN2;A0A0R0L896;A0A0R0GAK0;A0A0R0LB64;I1M7W9;C6TEZ8;I1JI64	165	GLYMA_02G255000;GLYMA_11G228000;GLYMA_14G061500	KRH14983;KRH14984;KRH14985;KRH31119;KRH73155;KRH73156;KRH73157;KRH73158	KRH14983;KRH14984;KRH14985;KRH31119;KRH73155;KRH73156;KRH73157;KRH73158
16.0272	14.9632	15.3824	16.9587	14.7979	17.6826	17.1565	19.1102	19.1125	15.5512	15.7669	16.3441				-1		aromatic compound biosynthetic process;biosynthetic process;cellular aromatic compound metabolic process;cellular biosynthetic process;cellular metabolic process;cellular nitrogen compound biosynthetic process;cellular nitrogen compound metabolic process;cellular process;heterocycle biosynthetic process;heterocycle metabolic process;metabolic process;nitrogen compound metabolic process;nucleobase…	adenyl nucleotide binding;adenyl ribonucleotide binding;adenylate kinase activity;anion binding;ATP binding;binding;carbohydrate derivative binding;catalytic activity;cytidylate kinase activity;heterocyclic compound binding;ion binding;kinase activity;nucleobase-containing compound kinase activity;nucleoside diphosphate kinase activity;nucleoside monophosphate kinase activity;nucleoside phosphate…	cellular anatomical entity;cytoplasm;intracellular membrane-bounded organelle;intracellular organelle;membrane-bounded organelle;organelle	biosynthetic process;cellular aromatic compound metabolic process;cellular nitrogen compound metabolic process;cellular process;heterocycle metabolic process;metabolic process;nitrogen compound metabolic process;nucleobase-containing compound metabolic process;nucleobase-containing small molecule metabolic process;phosphorus metabolic process;phosphorylation;primary metabolic process;small molecu…	cellular anatomical entity;cytoplasm;intracellular membrane-bounded organelle;intracellular organelle;organelle		ADK;DUF1995		Kinase;Referenceproteome;Transferase		GO:0006139;GO:0006725;GO:0006753;GO:0006793;GO:0006796;GO:0006807;GO:0008152;GO:0009058;GO:0009141;GO:0009142;GO:0009987;GO:0016310;GO:0018130;GO:0019438;GO:0019637;GO:0034641;GO:0034654;GO:0044237;GO:0044238;GO:0044249;GO:0044271;GO:0044281;GO:0046483;GO:0055086;GO:0071704;GO:0090407;GO:1901293;GO:1901360;GO:1901362;GO:1901576	GO:0000166;GO:0003824;GO:0004017;GO:0004127;GO:0004550;GO:0005488;GO:0005524;GO:0016301;GO:0016740;GO:0016772;GO:0016776;GO:0017076;GO:0019205;GO:0030554;GO:0032553;GO:0032555;GO:0032559;GO:0035639;GO:0036094;GO:0043167;GO:0043168;GO:0050145;GO:0097159;GO:0097367;GO:1901265;GO:1901363	GO:0005737;GO:0043226;GO:0043227;GO:0043229;GO:0043231;GO:0110165	GO:0006139;GO:0006725;GO:0006793;GO:0006807;GO:0008152;GO:0009058;GO:0009987;GO:0016310;GO:0034641;GO:0044238;GO:0044281;GO:0046483;GO:0055086	GO:0005737;GO:0043226;GO:0043229;GO:0043231;GO:0110165	3	3	3	7.5	7.5	7.5	56.071	0	6.4453	3042400	6	9	I1MI10;A0A0R0GB74;I1MI09;K7LCU0	I1MI10;A0A0R0GB74;I1MI09	166	GLYMA_15G203100	KRH12898;KRH12899;KRH12900	KRH12898;KRH12899;KRH12900
19.9516	19.0459	18.7832	18.9153	17.8446	18.4016	19.1965	18.1626	18.1645	20.073	19.7448	19.1084				-1			adenyl nucleotide binding;adenyl ribonucleotide binding;anion binding;ATP binding;ATP-dependent activity;ATP-dependent activity, acting on RNA;binding;carbohydrate derivative binding;catalytic activity;catalytic activity, acting on a nucleic acid;catalytic activity, acting on RNA;helicase activity;heterocyclic compound binding;hydrolase activity;ion binding;mRNA binding;nucleic acid binding;nucle…	catalytic complex;catalytic step 2 spliceosome;cellular anatomical entity;intracellular non-membrane-bounded organelle;intracellular organelle;non-membrane-bounded organelle;nuclear protein-containing complex;nucleolus;organelle;protein-containing complex;ribonucleoprotein complex;spliceosomal complex		catalytic complex;cellular anatomical entity;intracellular non-membrane-bounded organelle;intracellular organelle;non-membrane-bounded organelle;nucleolus;organelle;protein-containing complex;ribonucleoprotein complex;spliceosomal complex		DEAD;Helicase_C		ATP-binding;Helicase;Hydrolase;Nucleotide-binding;Referenceproteome			GO:0000166;GO:0003676;GO:0003723;GO:0003724;GO:0003729;GO:0003824;GO:0004386;GO:0005488;GO:0005524;GO:0008186;GO:0016787;GO:0017076;GO:0030554;GO:0032553;GO:0032555;GO:0032559;GO:0035639;GO:0036094;GO:0043167;GO:0043168;GO:0097159;GO:0097367;GO:0140098;GO:0140640;GO:0140657;GO:1901265;GO:1901363	GO:0005681;GO:0005730;GO:0032991;GO:0043226;GO:0043228;GO:0043229;GO:0043232;GO:0071013;GO:0110165;GO:0140513;GO:1902494;GO:1990904		GO:0005681;GO:0005730;GO:0032991;GO:0043226;GO:0043228;GO:0043229;GO:0043232;GO:0110165;GO:1902494;GO:1990904	3	2	2	9.4	6.9	6.9	45.971	0	4.2411	9293900	16	0	A0A0R0GBB6;I1L171	A0A0R0GBB6;I1L171	167	GLYMA_09G052500;GLYMA_15G158800	KRH12197;KRH37217	KRH12197;KRH37217
18.8416	18.6917	18.63	18.6738	18.717	17.7347	15.498	18.5883	18.7389	19.8984	18.804	18.688				-1			aldehyde dehydrogenase (NAD+) activity;aldehyde dehydrogenase [NAD(P)+] activity;catalytic activity;glyceraldehyde-3-phosphate dehydrogenase (NAD+) (non-phosphorylating) activity;oxidoreductase activity;oxidoreductase activity, acting on the aldehyde or oxo group of donors;oxidoreductase activity, acting on the aldehyde or oxo group of donors, NAD or NADP as acceptor	cellular anatomical entity;membrane		cellular anatomical entity;membrane		Aldedh		Membrane;Oxidoreductase;Referenceproteome;Transmembrane;Transmembranehelix			GO:0003824;GO:0004029;GO:0004030;GO:0016491;GO:0016620;GO:0016903;GO:0043878	GO:0016020;GO:0110165		GO:0016020;GO:0110165	3	3	3	16.6	16.6	16.6	38.359	0	5.8919	6738500	7	1	A0A0R0GC36;I1MHG7;I1MHG8;I1MHH0;I1MHG6;I1MHH1;C6T8B7;I1L1Q8;Q84P31	A0A0R0GC36;I1MHG7;I1MHG8;I1MHH0;I1MHG6;I1MHH1	168	GLYMA_15G178400	KRH12550;KRH12551;KRH12552;KRH12553;KRH12554;KRH12555	KRH12550;KRH12551;KRH12552;KRH12553;KRH12554;KRH12555
21.4047	22.2654	21.7101	21.9288	21.6897	22.0809	22.1771	20.6991	20.7013	22.1721	22.1415	21.7901				-1										Referenceproteome							1	1	1	11.5	11.5	11.5	10.822	0	3.8392	44106000	33	0	I1MJQ4;C6T516;A0A0R0GDM9	I1MJQ4;C6T516;A0A0R0GDM9	170	GLYMA_15G275600;GLYMA_15G275700	KRH13969;KRH13970	KRH13969;KRH13970
20.6012	20.2098	20.004	19.8063	20.2314	20.1817	20.4962	19.9533	19.8794	20.111	20.2523	20.0748				-1		carboxylic acid catabolic process;carboxylic acid metabolic process;catabolic process;cellular catabolic process;cellular lipid catabolic process;cellular lipid metabolic process;cellular metabolic process;cellular process;fatty acid beta-oxidation;fatty acid catabolic process;fatty acid metabolic process;fatty acid oxidation;lipid catabolic process;lipid metabolic process;lipid modification;lipi…	acetyl-CoA C-acetyltransferase activity;acetyl-CoA C-acyltransferase activity;acetyltransferase activity;acyltransferase activity;acyltransferase activity, transferring groups other than amino-acyl groups;C-acetyltransferase activity;C-acyltransferase activity;catalytic activity;transferase activity		catabolic process;cellular lipid metabolic process;cellular process;lipid metabolic process;metabolic process;monocarboxylic acid metabolic process;organic acid metabolic process;primary metabolic process;small molecule metabolic process			Thiolase_C;Thiolase_N		Acyltransferase;Peroxisome;Referenceproteome;Transferase		GO:0006082;GO:0006629;GO:0006631;GO:0006635;GO:0008152;GO:0009056;GO:0009062;GO:0009987;GO:0016042;GO:0016054;GO:0019395;GO:0019752;GO:0030258;GO:0032787;GO:0034440;GO:0043436;GO:0044237;GO:0044238;GO:0044242;GO:0044248;GO:0044255;GO:0044281;GO:0044282;GO:0046395;GO:0071704;GO:0072329;GO:1901575	GO:0003824;GO:0003985;GO:0003988;GO:0016407;GO:0016408;GO:0016453;GO:0016740;GO:0016746;GO:0016747		GO:0006082;GO:0006629;GO:0008152;GO:0009056;GO:0009987;GO:0032787;GO:0044238;GO:0044255;GO:0044281		8	8	7	31.7	31.7	29.5	41.681	0	63.967	34787000	81	0	C6TCN9;A0A0R0GDY6;I1JJT8;I1JJT9;I1M669	C6TCN9;A0A0R0GDY6;I1JJT8;I1JJT9;I1M669	172	GLYMA_02G308500;GLYMA_14G004600	KRH14066;KRH14067;KRH74050;KRH74051	KRH14066;KRH14067;KRH74050;KRH74051
22.0966	22.0572	22.3492	22.2923	22.0196	22.1649	22.1559	22.3081	22.2522	21.6649	21.8688	22.3403				-1		catabolic process;cellular catabolic process;cellular metabolic process;cellular process;cellular response to chemical stimulus;cellular response to chemical stress;cellular response to oxidative stress;cellular response to stimulus;cellular response to stress;hydrogen peroxide catabolic process;hydrogen peroxide metabolic process;metabolic process;organic substance catabolic process;organic subs…	antioxidant activity;binding;catalytic activity;heme binding;organic cyclic compound binding;oxidoreductase activity;oxidoreductase activity, acting on peroxide as acceptor;peroxidase activity;tetrapyrrole binding		catabolic process;cellular process;metabolic process;response to chemical;response to oxidative stress;response to stimulus;response to stress			peroxidase		Referenceproteome		GO:0000302;GO:0006950;GO:0006979;GO:0008152;GO:0009056;GO:0009987;GO:0033554;GO:0034599;GO:0042221;GO:0042743;GO:0042744;GO:0044237;GO:0044248;GO:0050896;GO:0051716;GO:0062197;GO:0070887;GO:0071704;GO:0072593;GO:1901575;GO:1901700	GO:0003824;GO:0004601;GO:0005488;GO:0016209;GO:0016491;GO:0016684;GO:0020037;GO:0046906;GO:0097159		GO:0006950;GO:0006979;GO:0008152;GO:0009056;GO:0009987;GO:0042221;GO:0050896		12	12	4	52.8	52.8	20.3	29.738	0	142.44	243030000	399	0	A0A0R0GEJ0;A0A0R0GNN3;C6TBZ8;A0A0R0GPP2	A0A0R0GEJ0;A0A0R0GNN3;C6TBZ8;A0A0R0GPP2	173	GLYMA_14G177200	KRH16777;KRH16778;KRH16779	KRH16777;KRH16778;KRH16779
16.1911	15.2844	17.2912	16.5451	14.8315	16.5157	19.4529	18.8952	18.8974	20.3022	17.2984	15.2198				-1		alpha-amino acid biosynthetic process;alpha-amino acid catabolic process;alpha-amino acid metabolic process;amide metabolic process;amino acid biosynthetic process;amino acid catabolic process;amino acid metabolic process;biosynthetic process;carboxylic acid biosynthetic process;carboxylic acid catabolic process;carboxylic acid metabolic process;catabolic process;cellular aromatic compound metabo…	amino acid binding;anion binding;binding;carboxylic acid binding;catalytic activity;cation binding;glycine hydroxymethyltransferase activity;heterocyclic compound binding;hydroxymethyl-, formyl- and related transferase activity;ion binding;metal ion binding;organic acid binding;organic cyclic compound binding;pyridoxal phosphate binding;serine binding;small molecule binding;transferase activity;t…	cellular anatomical entity;cytoplasm	amide metabolic process;amino acid metabolic process;biosynthetic process;catabolic process;cellular aromatic compound metabolic process;cellular modified amino acid metabolic process;cellular process;heterocycle metabolic process;metabolic process;nitrogen compound metabolic process;one-carbon metabolic process;organic acid metabolic process;primary metabolic process;small molecule metabolic pro…	cellular anatomical entity;cytoplasm		SHMT		One-carbonmetabolism;Pyridoxalphosphate;Referenceproteome;Transferase		GO:0006082;GO:0006520;GO:0006544;GO:0006545;GO:0006563;GO:0006565;GO:0006575;GO:0006725;GO:0006730;GO:0006760;GO:0006766;GO:0006767;GO:0006807;GO:0008152;GO:0008652;GO:0009056;GO:0009058;GO:0009063;GO:0009069;GO:0009070;GO:0009071;GO:0009987;GO:0016053;GO:0016054;GO:0019264;GO:0019752;GO:0035999;GO:0042558;GO:0043436;GO:0043603;GO:0043648;GO:0044237;GO:0044238;GO:0044248;GO:0044249;GO:0044281;GO:…	GO:0003824;GO:0004372;GO:0005488;GO:0008270;GO:0016597;GO:0016740;GO:0016741;GO:0016742;GO:0019842;GO:0030170;GO:0031406;GO:0036094;GO:0043167;GO:0043168;GO:0043169;GO:0043177;GO:0046872;GO:0046914;GO:0070279;GO:0070905;GO:0097159;GO:1901363	GO:0005737;GO:0110165	GO:0006082;GO:0006520;GO:0006575;GO:0006725;GO:0006730;GO:0006766;GO:0006807;GO:0008152;GO:0009056;GO:0009058;GO:0009987;GO:0043603;GO:0044238;GO:0044281;GO:0046483	GO:0005737;GO:0110165	14	3	2	44.5	16.9	8.7	47.004	0	2.6362	4423800	5	8	I1MB25;A0A0R0GEV0;A0A0R4J574;K7KA00;A0A0R4J2Q8;I1MB24;A0A0R0KZQ5;A0A0R0GM62;A0A0R0GS94	I1MB25;A0A0R0GEV0;A0A0R4J574;K7KA00;A0A0R4J2Q8;I1MB24;A0A0R0KZQ5;A0A0R0GM62;A0A0R0GS94	174	GLYMA_02G217100;GLYMA_14G184500	KRH16896;KRH16897;KRH16898;KRH16899;KRH16900;KRH16901;KRH72501;KRH72502;KRH72503	KRH16896;KRH16897;KRH16898;KRH16899;KRH16900;KRH16901;KRH72501;KRH72502;KRH72503
25.7993	24.923	25.047	25.0235	24.9795	24.9412	25.005	25.6544	25.6567	25.6713	25.6656	25.557				-1		ADP catabolic process;ADP metabolic process;aromatic compound catabolic process;ATP metabolic process;biosynthetic process;carbohydrate biosynthetic process;carbohydrate catabolic process;carbohydrate derivative catabolic process;carbohydrate derivative metabolic process;carbohydrate metabolic process;carboxylic acid metabolic process;catabolic process;cellular aromatic compound metabolic process…	adenyl nucleotide binding;adenyl ribonucleotide binding;ADP binding;anion binding;ATP binding;binding;carbohydrate derivative binding;catalytic activity;heterocyclic compound binding;ion binding;kinase activity;nucleoside phosphate binding;nucleotide binding;organic cyclic compound binding;phosphoglycerate kinase activity;phosphotransferase activity, carboxyl group as acceptor;purine nucleotide b…	cellular anatomical entity;cytosol	biosynthetic process;carbohydrate derivative metabolic process;carbohydrate metabolic process;catabolic process;cellular aromatic compound metabolic process;cellular nitrogen compound metabolic process;cellular process;generation of precursor metabolites and energy;heterocycle metabolic process;metabolic process;monocarboxylic acid metabolic process;nitrogen compound metabolic process;nucleobase-…	cellular anatomical entity;cytosol		PGK		ATP-binding;Kinase;Nucleotide-binding;Referenceproteome;Transferase		GO:0005975;GO:0005996;GO:0006006;GO:0006082;GO:0006090;GO:0006091;GO:0006094;GO:0006096;GO:0006139;GO:0006163;GO:0006195;GO:0006725;GO:0006753;GO:0006793;GO:0006796;GO:0006807;GO:0008152;GO:0009056;GO:0009058;GO:0009117;GO:0009132;GO:0009134;GO:0009135;GO:0009137;GO:0009141;GO:0009144;GO:0009150;GO:0009154;GO:0009166;GO:0009179;GO:0009181;GO:0009185;GO:0009191;GO:0009199;GO:0009205;GO:0009259;GO:…	GO:0000166;GO:0003824;GO:0004618;GO:0005488;GO:0005524;GO:0016301;GO:0016740;GO:0016772;GO:0016774;GO:0017076;GO:0030554;GO:0032553;GO:0032555;GO:0032559;GO:0035639;GO:0036094;GO:0043167;GO:0043168;GO:0043531;GO:0097159;GO:0097367;GO:1901265;GO:1901363	GO:0005829;GO:0110165	GO:0005975;GO:0006082;GO:0006090;GO:0006091;GO:0006139;GO:0006725;GO:0006793;GO:0006807;GO:0008152;GO:0009056;GO:0009058;GO:0009117;GO:0009987;GO:0016310;GO:0032787;GO:0034641;GO:0034655;GO:0044238;GO:0044281;GO:0046483;GO:0055086;GO:1901135	GO:0005829;GO:0110165	31	31	5	72.5	72.5	11.2	50.066	0	323.31	3.9599e+09	1854	0	A0A0R0GFW6;I1MJC6	A0A0R0GFW6;I1MJC6	175	GLYMA_15G261900	KRH13755;KRH13756	KRH13755;KRH13756
19.1376	18.4418	19.6465	18.7878	19.4173	19.1811	19.5568	19.5485	19.5507	19.6148	19.6958	18.8965				-1		alpha-amino acid biosynthetic process;alpha-amino acid metabolic process;amino acid biosynthetic process;amino acid metabolic process;biosynthetic process;branched-chain amino acid biosynthetic process;branched-chain amino acid metabolic process;carboxylic acid biosynthetic process;carboxylic acid metabolic process;cellular biosynthetic process;cellular metabolic process;cellular process;leucine …	3-isopropylmalate dehydratase activity;4 iron, 4 sulfur cluster binding;binding;carbon-oxygen lyase activity;catalytic activity;cation binding;hydro-lyase activity;ion binding;iron-sulfur cluster binding;lyase activity;metal cluster binding;metal ion binding		amino acid metabolic process;biosynthetic process;cellular process;metabolic process;nitrogen compound metabolic process;organic acid metabolic process;primary metabolic process;small molecule metabolic process			Aconitase		4Fe-4S;Iron;Iron-sulfur;Lyase;Metal-binding;Referenceproteome		GO:0006082;GO:0006520;GO:0006551;GO:0006807;GO:0008152;GO:0008652;GO:0009058;GO:0009081;GO:0009082;GO:0009098;GO:0009987;GO:0016053;GO:0019752;GO:0043436;GO:0044237;GO:0044238;GO:0044249;GO:0044281;GO:0044283;GO:0046394;GO:0071704;GO:1901564;GO:1901566;GO:1901576;GO:1901605;GO:1901607	GO:0003824;GO:0003861;GO:0005488;GO:0016829;GO:0016835;GO:0016836;GO:0043167;GO:0043169;GO:0046872;GO:0051536;GO:0051539;GO:0051540		GO:0006082;GO:0006520;GO:0006807;GO:0008152;GO:0009058;GO:0009987;GO:0044238;GO:0044281		1	1	1	3	3	3	54.666	0.0049923	1.8258	8460600	6	0	A0A0R0GG96;K7MP05	A0A0R0GG96;K7MP05	176	GLYMA_14G217300;GLYMA_17G256100	KRH05916;KRH17398	KRH05916;KRH17398
17.3963	15.4952	15.8124	15.6478	15.5498	15.159	17.1194	15.4256	15.8358	15.3095	15.1714	15.8908				-1		catabolic process;cellular process;cellular response to stimulus;cellular response to stress;ERAD pathway;macromolecule catabolic process;macromolecule metabolic process;metabolic process;modification-dependent macromolecule catabolic process;modification-dependent protein catabolic process;nitrogen compound metabolic process;organic substance catabolic process;organic substance metabolic process…	binding;misfolded protein binding;modification-dependent protein binding;polyubiquitin modification-dependent protein binding;protein binding	BAT3 complex;ER membrane insertion complex;protein-containing complex	catabolic process;cellular process;macromolecule catabolic process;macromolecule metabolic process;metabolic process;nitrogen compound metabolic process;primary metabolic process;protein catabolic process;protein metabolic process;proteolysis;proteolysis involved in protein catabolic process;response to chemical;response to stimulus;response to stress	protein-containing complex		ubiquitin		Referenceproteome		GO:0006508;GO:0006511;GO:0006807;GO:0006950;GO:0008152;GO:0009056;GO:0009057;GO:0009987;GO:0010033;GO:0010243;GO:0010498;GO:0019538;GO:0019941;GO:0030163;GO:0030433;GO:0033554;GO:0034976;GO:0036503;GO:0042221;GO:0043161;GO:0043170;GO:0043632;GO:0044238;GO:0050896;GO:0051603;GO:0051716;GO:0071704;GO:1901564;GO:1901565;GO:1901575;GO:1901698	GO:0005488;GO:0005515;GO:0031593;GO:0051787;GO:0140030	GO:0032991;GO:0071818;GO:0072379	GO:0006508;GO:0006807;GO:0006950;GO:0008152;GO:0009056;GO:0009057;GO:0009987;GO:0019538;GO:0030163;GO:0042221;GO:0043170;GO:0044238;GO:0050896;GO:0051603	GO:0032991	1	1	1	2.7	2.7	2.7	96.599	0.0031434	1.9876	411770	2	4	A0A0R0GGB7;A0A0R0GGA5;A0A0R0GT38;A0A0R0GGH1;I1MBZ3	A0A0R0GGB7;A0A0R0GGA5;A0A0R0GT38;A0A0R0GGH1;I1MBZ3	177	GLYMA_14G223100	KRH17498;KRH17499;KRH17500;KRH17501;KRH17502;KRH17503;KRH17504;KRH17505;KRH17506;KRH17507	KRH17498;KRH17499;KRH17500;KRH17501;KRH17502;KRH17503;KRH17504;KRH17505;KRH17506;KRH17507
16.1395	18.4145	16.335	18.3613	16.6552	16.6944	18.1489	19.0101	19.0123	16.9687	15.0616	15.2537				-1		macromolecule metabolic process;metabolic process;nitrogen compound metabolic process;organic substance metabolic process;organonitrogen compound metabolic process;primary metabolic process;protein metabolic process;proteolysis	catalytic activity;catalytic activity, acting on a protein;endopeptidase activity;hydrolase activity;oligopeptidase activity;peptidase activity;serine hydrolase activity;serine-type endopeptidase activity;serine-type peptidase activity	cellular anatomical entity;cytoplasm;cytosol	macromolecule metabolic process;metabolic process;nitrogen compound metabolic process;primary metabolic process;protein metabolic process;proteolysis	cellular anatomical entity;cytoplasm;cytosol		Peptidase_S9;Peptidase_S9_N		Hydrolase;Protease;Referenceproteome;Serineprotease		GO:0006508;GO:0006807;GO:0008152;GO:0019538;GO:0043170;GO:0044238;GO:0071704;GO:1901564	GO:0003824;GO:0004175;GO:0004252;GO:0008233;GO:0008236;GO:0016787;GO:0017171;GO:0070012;GO:0140096	GO:0005737;GO:0005829;GO:0110165	GO:0006508;GO:0006807;GO:0008152;GO:0019538;GO:0043170;GO:0044238	GO:0005737;GO:0005829;GO:0110165	1	1	1	1.7	1.7	1.7	83.855	0	9.6108	2286200	2	7	A0A0R0GNB0;A0A0R0GGG0	A0A0R0GNB0;A0A0R0GGG0	178	GLYMA_14G222700	KRH17489;KRH17490	KRH17489;KRH17490
19.2214	20.4958	19.6558	20.5914	20.4484	20.2166	20.6158	18.4882	18.4956	18.4596	20.1083	20.2538				-1		biological process involved in interspecies interaction between organisms;macromolecule metabolic process;metabolic process;nitrogen compound metabolic process;organic substance metabolic process;organonitrogen compound metabolic process;primary metabolic process;protein metabolic process;proteolysis;response to biotic stimulus;response to external biotic stimulus;response to external stimulus;re…	catalytic activity;catalytic activity, acting on a protein;endopeptidase activity;hydrolase activity;peptidase activity;serine hydrolase activity;serine-type endopeptidase activity;serine-type peptidase activity	cellular anatomical entity;extracellular region	biological process involved in interspecies interaction between organisms;macromolecule metabolic process;metabolic process;nitrogen compound metabolic process;primary metabolic process;protein metabolic process;proteolysis;response to biotic stimulus;response to external stimulus;response to stimulus	cellular anatomical entity;extracellular region		fn3_6;Inhibitor_I9;PA;Peptidase_S8		Hydrolase;Protease;Referenceproteome;Secreted;Serineprotease;Signal		GO:0006508;GO:0006807;GO:0008152;GO:0009605;GO:0009607;GO:0009608;GO:0009610;GO:0009620;GO:0019538;GO:0043170;GO:0043207;GO:0044238;GO:0044419;GO:0050896;GO:0051707;GO:0071704;GO:1901564	GO:0003824;GO:0004175;GO:0004252;GO:0008233;GO:0008236;GO:0016787;GO:0017171;GO:0140096	GO:0005576;GO:0110165	GO:0006508;GO:0006807;GO:0008152;GO:0009605;GO:0009607;GO:0019538;GO:0043170;GO:0044238;GO:0044419;GO:0050896	GO:0005576;GO:0110165	8	8	8	16.5	16.5	16.5	84.085	0	25.369	29377000	52	0	A0A0R0GGN1;A0A0R0GJF4;K7M4Y8	A0A0R0GGN1	179	GLYMA_14G048000	KRH14771	KRH14771
15.7669	16.0352	15.6613	15.9068	15.7219	15.9773	15.5033	16.037	16.5872	16.6537	15.7586	16.1183				-1		biological regulation;cellular process;cellular response to heat;cellular response to stimulus;cellular response to stress;protein folding;protein stabilization;regulation of biological quality;regulation of protein stability;response to abiotic stimulus;response to heat;response to stimulus;response to stress;response to temperature stimulus	adenyl nucleotide binding;adenyl ribonucleotide binding;anion binding;ATP binding;ATP hydrolysis activity;ATP-dependent activity;ATP-dependent protein folding chaperone;binding;carbohydrate derivative binding;catalytic activity;heterocyclic compound binding;hydrolase activity;hydrolase activity, acting on acid anhydrides;hydrolase activity, acting on acid anhydrides, in phosphorus-containing anhy…	cellular anatomical entity;cytosol;membrane;perinuclear region of cytoplasm;plasma membrane;protein-containing complex	biological regulation;cellular process;protein folding;protein stabilization;regulation of biological quality;regulation of protein stability;response to abiotic stimulus;response to heat;response to stimulus;response to stress	cellular anatomical entity;cytosol;membrane;plasma membrane;protein-containing complex		HATPase_c;HSP90		ATP-binding;Chaperone;Nucleotide-binding;Referenceproteome		GO:0006457;GO:0006950;GO:0009266;GO:0009408;GO:0009628;GO:0009987;GO:0031647;GO:0033554;GO:0034605;GO:0050821;GO:0050896;GO:0051716;GO:0065007;GO:0065008	GO:0000166;GO:0003824;GO:0005488;GO:0005515;GO:0005524;GO:0016462;GO:0016787;GO:0016817;GO:0016818;GO:0016887;GO:0017076;GO:0017111;GO:0030554;GO:0032553;GO:0032555;GO:0032559;GO:0035639;GO:0036094;GO:0043167;GO:0043168;GO:0044183;GO:0051082;GO:0097159;GO:0097367;GO:0140657;GO:0140662;GO:1901265;GO:1901363	GO:0005829;GO:0005886;GO:0016020;GO:0032991;GO:0048471;GO:0110165	GO:0006457;GO:0006950;GO:0009408;GO:0009628;GO:0009987;GO:0031647;GO:0050821;GO:0050896;GO:0065007;GO:0065008	GO:0005829;GO:0005886;GO:0016020;GO:0032991;GO:0110165	3	1	1	6.6	3.3	3.3	89.715	0.0031608	2.0306	399410	2	6	I1JJQ4;A0A0R0GHB3	I1JJQ4;A0A0R0GHB3	180	GLYMA_02G305600;GLYMA_14G007700	KRH14117;KRH74006	KRH14117;KRH74006
19.8465	19.9472	20.3334	19.7244	20.1406	20.2029	20.1864	19.9795	19.9682	20.2488	20.3346	20.1794				-1			catalytic activity;sulfurtransferase activity;thiosulfate sulfurtransferase activity;transferase activity;transferase activity, transferring sulphur-containing groups	cellular anatomical entity;intracellular membrane-bounded organelle;intracellular organelle;membrane-bounded organelle;mitochondrion;organelle		cellular anatomical entity;intracellular membrane-bounded organelle;intracellular organelle;mitochondrion;organelle		Rhodanese		Referenceproteome;Repeat;Signal;Transferase			GO:0003824;GO:0004792;GO:0016740;GO:0016782;GO:0016783	GO:0005739;GO:0043226;GO:0043227;GO:0043229;GO:0043231;GO:0110165		GO:0005739;GO:0043226;GO:0043229;GO:0043231;GO:0110165	8	8	3	35.7	35.7	13.3	42.37	0	64.57	36522000	57	0	I1MJB3;A0A0R0GHQ9;C6TH99	I1MJB3;A0A0R0GHQ9;C6TH99	181	GLYMA_15G260300	KRH13731;KRH13732	KRH13731;KRH13732
17.8842	19.8745	19.8859	19.8843	20.369	19.4595	20.2104	15.9831	17.2803	19.9545	18.5211	19.1992				-1			catalytic activity;hydrolase activity;hydrolase activity, acting on ester bonds	cellular anatomical entity;membrane		cellular anatomical entity;membrane		Lipase_GDSL		Membrane;Referenceproteome;Signal;Transmembrane;Transmembranehelix			GO:0003824;GO:0016787;GO:0016788	GO:0016020;GO:0110165		GO:0016020;GO:0110165	3	3	3	12.6	12.6	12.6	38.959	0	8.1765	11087000	9	2	A0A0R0GIE2;K7MWN7;I1LX38;I1N6U2;I1K2M9;I1N6T6;I1N6U4;I1LX46;A0A0R0EUZ8;I1LX47;C6TK49	A0A0R0GIE2;K7MWN7;I1LX38;I1N6U2;I1K2M9;I1N6T6;I1N6U4;I1LX46;A0A0R0EUZ8	182	GLYMA_05G116300;GLYMA_13G044500;GLYMA_13G045100;GLYMA_19G050000;GLYMA_19G050800;GLYMA_19G050900;GLYMA_19G051000;GLYMA_19G051100	KRG93924;KRG93937;KRG93938;KRG93939;KRG93940;KRH18211;KRH18221;KRH18222;KRH58258	KRG93924;KRG93937;KRG93938;KRG93939;KRG93940;KRH18211;KRH18221;KRH18222;KRH58258
18.6839	20.7378	20.6945	21.1122	21.0265	20.83	20.866	17.2327	17.8373	18.2066	18.8417	18.8557				-1		catabolic process;cellular catabolic process;cellular metabolic process;cellular process;hydrogen peroxide catabolic process;hydrogen peroxide metabolic process;metabolic process;organic substance catabolic process;organic substance metabolic process;reactive oxygen species metabolic process;response to oxidative stress;response to stimulus;response to stress	antioxidant activity;binding;catalytic activity;cation binding;heme binding;ion binding;lactoperoxidase activity;metal ion binding;organic cyclic compound binding;oxidoreductase activity;oxidoreductase activity, acting on peroxide as acceptor;peroxidase activity;tetrapyrrole binding	cellular anatomical entity;extracellular region	catabolic process;cellular process;metabolic process;response to oxidative stress;response to stimulus;response to stress	cellular anatomical entity;extracellular region		peroxidase		Calcium;Disulfidebond;Heme;Hydrogenperoxide;Iron;Metal-binding;Oxidoreductase;Peroxidase;Referenceproteome;Secreted;Signal		GO:0006950;GO:0006979;GO:0008152;GO:0009056;GO:0009987;GO:0042743;GO:0042744;GO:0044237;GO:0044248;GO:0050896;GO:0071704;GO:0072593;GO:1901575	GO:0003824;GO:0004601;GO:0005488;GO:0016209;GO:0016491;GO:0016684;GO:0020037;GO:0043167;GO:0043169;GO:0046872;GO:0046906;GO:0097159;GO:0140825	GO:0005576;GO:0110165	GO:0006950;GO:0006979;GO:0008152;GO:0009056;GO:0009987;GO:0050896	GO:0005576;GO:0110165	5	5	5	23.7	23.7	23.7	35.248	0	34.663	18820000	19	0	A0A0R0GIU4;K7KAT8	A0A0R0GIU4	183	GLYMA_14G053700	KRH14873	KRH14873
18.61	19.4688	19.5563	19.6385	20.2109	19.5242	19.9798	18.9446	18.9464	15.6881	19.2042	19.1813				-1		amino acid biosynthetic process;amino acid metabolic process;aromatic amino acid family biosynthetic process;aromatic amino acid metabolic process;aromatic compound biosynthetic process;biosynthetic process;carboxylic acid biosynthetic process;carboxylic acid metabolic process;cellular aromatic compound metabolic process;cellular biosynthetic process;cellular metabolic process;cellular process;ch…	catalytic activity;chorismate mutase activity;intramolecular transferase activity;isomerase activity	cellular anatomical entity;cytoplasm	amino acid metabolic process;biosynthetic process;cellular aromatic compound metabolic process;cellular process;metabolic process;nitrogen compound metabolic process;organic acid metabolic process;primary metabolic process;small molecule metabolic process	cellular anatomical entity;cytoplasm				Amino-acidbiosynthesis;Aromaticaminoacidbiosynthesis;Isomerase;Referenceproteome;Signal		GO:0006082;GO:0006520;GO:0006725;GO:0006807;GO:0008152;GO:0008652;GO:0009058;GO:0009072;GO:0009073;GO:0009987;GO:0016053;GO:0019438;GO:0019752;GO:0043436;GO:0043648;GO:0044237;GO:0044238;GO:0044249;GO:0044281;GO:0044283;GO:0046394;GO:0046417;GO:0071704;GO:1901360;GO:1901362;GO:1901564;GO:1901566;GO:1901576	GO:0003824;GO:0004106;GO:0016853;GO:0016866	GO:0005737;GO:0110165	GO:0006082;GO:0006520;GO:0006725;GO:0006807;GO:0008152;GO:0009058;GO:0009987;GO:0044238;GO:0044281	GO:0005737;GO:0110165	1	1	1	4.6	4.6	4.6	29.584	0	5.4086	7610500	6	1	C6THT1;A0A0R0GNL7;A0A0R0GIU8;I1MX48;I1MX47	C6THT1;A0A0R0GNL7;A0A0R0GIU8;I1MX48;I1MX47	184	GLYMA_14G102700;GLYMA_17G222700	KRH05364;KRH05365;KRH05366;KRH15651;KRH15652	KRH05364;KRH05365;KRH05366;KRH15651;KRH15652
20.0137	15.4995	17.7233	16.1771	15.1386	17.8945	16.2303	20.7098	20.712	18.0619	14.4727	18.118				-1		cellular process;cellular response to heat;cellular response to stimulus;cellular response to stress;protein folding;protein refolding;response to abiotic stimulus;response to heat;response to stimulus;response to stress;response to temperature stimulus	adenyl nucleotide binding;adenyl ribonucleotide binding;anion binding;ATP binding;ATP hydrolysis activity;binding;carbohydrate derivative binding;catalytic activity;heterocyclic compound binding;hydrolase activity;hydrolase activity, acting on acid anhydrides;hydrolase activity, acting on acid anhydrides, in phosphorus-containing anhydrides;ion binding;nucleoside phosphate binding;nucleotide bind…	cellular anatomical entity;cytoplasm	cellular process;protein folding;response to abiotic stimulus;response to heat;response to stimulus;response to stress	cellular anatomical entity;cytoplasm		AAA;AAA_2;AAA_lid_9;Clp_N;ClpB_D2-small		ATP-binding;Chaperone;Coiledcoil;Nucleotide-binding;Referenceproteome;Repeat		GO:0006457;GO:0006950;GO:0009266;GO:0009408;GO:0009628;GO:0009987;GO:0033554;GO:0034605;GO:0042026;GO:0050896;GO:0051716	GO:0000166;GO:0003824;GO:0005488;GO:0005524;GO:0016462;GO:0016787;GO:0016817;GO:0016818;GO:0016887;GO:0017076;GO:0017111;GO:0030554;GO:0032553;GO:0032555;GO:0032559;GO:0035639;GO:0036094;GO:0043167;GO:0043168;GO:0097159;GO:0097367;GO:1901265;GO:1901363	GO:0005737;GO:0110165	GO:0006457;GO:0006950;GO:0009408;GO:0009628;GO:0009987;GO:0050896	GO:0005737;GO:0110165	7	7	7	8.7	8.7	8.7	110.16	0	13.173	12241000	26	2	A0A0R0GIY4;I1N6A2;A0A0R0IV62;I1N4I0;A0A0R0IX14;A0A0R0IZW3	A0A0R0GIY4;I1N6A2	185	GLYMA_13G058600;GLYMA_19G027900	KRG93616;KRG93617;KRH18417	KRG93616;KRG93617;KRH18417
18.8574	17.9635	18.1567	17.7169	17.6936	18.0736	17.9682	18.1994	18.2016	16.4011	17.5727	18.5418				-1		macromolecule metabolic process;metabolic process;nitrogen compound metabolic process;organic substance metabolic process;organonitrogen compound metabolic process;primary metabolic process;protein metabolic process;proteolysis	catalytic activity;catalytic activity, acting on a protein;endopeptidase activity;hydrolase activity;peptidase activity;serine hydrolase activity;serine-type endopeptidase activity;serine-type peptidase activity	cellular anatomical entity;intracellular membrane-bounded organelle;intracellular organelle;membrane-bounded organelle;organelle	macromolecule metabolic process;metabolic process;nitrogen compound metabolic process;primary metabolic process;protein metabolic process;proteolysis	cellular anatomical entity;intracellular membrane-bounded organelle;intracellular organelle;organelle		PDZ_2;Trypsin_2		Referenceproteome		GO:0006508;GO:0006807;GO:0008152;GO:0019538;GO:0043170;GO:0044238;GO:0071704;GO:1901564	GO:0003824;GO:0004175;GO:0004252;GO:0008233;GO:0008236;GO:0016787;GO:0017171;GO:0140096	GO:0043226;GO:0043227;GO:0043229;GO:0043231;GO:0110165	GO:0006508;GO:0006807;GO:0008152;GO:0019538;GO:0043170;GO:0044238	GO:0043226;GO:0043229;GO:0043231;GO:0110165	3	3	3	9	9	9	48.516	0	4.4646	4855200	21	0	I1LWK0;A0A0R0GJ52	I1LWK0;A0A0R0GJ52	186	GLYMA_13G063400	KRH18480;KRH18481	KRH18480;KRH18481
14.5316	14.8134	14.983	14.6653	14.1198	14.8487	15.1708	16.1188	14.5404	14.2111	13.0843	14.3476				-1			adenyl nucleotide binding;adenyl ribonucleotide binding;anion binding;ATP binding;binding;carbohydrate derivative binding;heterocyclic compound binding;ion binding;nucleoside phosphate binding;nucleotide binding;organic cyclic compound binding;purine nucleotide binding;purine ribonucleoside triphosphate binding;purine ribonucleotide binding;ribonucleotide binding;small molecule binding					ABC_tran		ATP-binding;Nucleotide-binding;Referenceproteome			GO:0000166;GO:0005488;GO:0005524;GO:0017076;GO:0030554;GO:0032553;GO:0032555;GO:0032559;GO:0035639;GO:0036094;GO:0043167;GO:0043168;GO:0097159;GO:0097367;GO:1901265;GO:1901363				1	1	1	4.9	4.9	4.9	31.56	0	2.97	315830	16	1	C6TBN0;A0A0R0GMF6	C6TBN0;A0A0R0GMF6	188	GLYMA_13G124700	KRH19580	KRH19580
20.019	20.282	20.3158	20.2248	19.9833	20.0909	20.6	20.4338	20.4415	19.5828	18.9199	20.0346				-1		catabolic process;macromolecule catabolic process;macromolecule metabolic process;metabolic process;modification-dependent macromolecule catabolic process;modification-dependent protein catabolic process;nitrogen compound metabolic process;organic substance catabolic process;organic substance metabolic process;organonitrogen compound catabolic process;organonitrogen compound metabolic process;pri…		cellular anatomical entity;cytoplasm;intracellular membrane-bounded organelle;intracellular organelle;membrane-bounded organelle;nucleus;organelle;proteasome core complex, beta-subunit complex;protein-containing complex	catabolic process;macromolecule catabolic process;macromolecule metabolic process;metabolic process;nitrogen compound metabolic process;primary metabolic process;protein catabolic process;protein metabolic process;proteolysis;proteolysis involved in protein catabolic process	cellular anatomical entity;cytoplasm;intracellular membrane-bounded organelle;intracellular organelle;nucleus;organelle;protein-containing complex		Proteasome		Cytoplasm;Nucleus;Proteasome;Referenceproteome		GO:0006508;GO:0006511;GO:0006807;GO:0008152;GO:0009056;GO:0009057;GO:0010498;GO:0019538;GO:0019941;GO:0030163;GO:0043161;GO:0043170;GO:0043632;GO:0044238;GO:0051603;GO:0071704;GO:1901564;GO:1901565;GO:1901575		GO:0005634;GO:0005737;GO:0019774;GO:0032991;GO:0043226;GO:0043227;GO:0043229;GO:0043231;GO:0110165	GO:0006508;GO:0006807;GO:0008152;GO:0009056;GO:0009057;GO:0019538;GO:0030163;GO:0043170;GO:0044238;GO:0051603	GO:0005634;GO:0005737;GO:0032991;GO:0043226;GO:0043229;GO:0043231;GO:0110165	4	4	2	31.2	31.2	19	21.061	0	56.397	21511000	105	0	A0A0R0GMQ7;I1MA65;I1MA63;C6SV91;A0A0R0JFH3	A0A0R0GMQ7;I1MA65;I1MA63;C6SV91	189	GLYMA_13G031200;GLYMA_14G152900	KRH16390;KRH16391;KRH16392;KRH16393;KRH17982;KRH17983	KRH16390;KRH16391;KRH16392;KRH16393;KRH17982;KRH17983
19.2809	19.9445	20.3388	20.4806	19.9596	20.6101	21.0137	19.9252	19.9272	19.6614	21.4066	20.6739				-1			catalytic activity;electron transfer activity;oxidoreductase activity	cellular anatomical entity;membrane		cellular anatomical entity;membrane		Cu_bind_like		Membrane;Referenceproteome;Signal;Transmembrane;Transmembranehelix			GO:0003824;GO:0009055;GO:0016491	GO:0016020;GO:0110165		GO:0016020;GO:0110165	4	4	4	20.2	20.2	20.2	34.036	0	10.953	35286000	30	0	A0A0R0GP18	A0A0R0GP18	191	GLYMA_13G158200	KRH20128	KRH20128
21.8484	22.4022	22.4681	22.5749	22.9327	22.6309	22.8184	22.4889	22.4911	22.4436	23.2838	22.6214				-1			acid phosphatase activity;binding;catalytic activity;cation binding;hydrolase activity;hydrolase activity, acting on ester bonds;ion binding;metal ion binding;phosphatase activity;phosphoric ester hydrolase activity					Metallophos;Metallophos_C;Pur_ac_phosph_N		Glycoprotein;Hydrolase;Iron;Metal-binding;Referenceproteome;Signal;Zinc			GO:0003824;GO:0003993;GO:0005488;GO:0016787;GO:0016788;GO:0016791;GO:0042578;GO:0043167;GO:0043169;GO:0046872				13	13	11	32.6	32.6	25.2	52.496	0	45.95	181300000	144	0	G0T435;A0A0R0GPB1;I1LZT0	G0T435;A0A0R0GPB1;I1LZT0	193	GLYMA_13G161900	KRH20185;KRH20186;KRH20187	KRH20185;KRH20186;KRH20187
16.881	19.6775	16.2286	19.8118	16.1812	20.3567	16.6751	16.7681	15.6507	20.5304	20.0473	20.0654				-1			catalytic activity;catalytic activity, acting on a protein;cis-trans isomerase activity;isomerase activity;peptidyl-prolyl cis-trans isomerase activity					FKBP_C		Isomerase;Referenceproteome;Rotamase			GO:0003755;GO:0003824;GO:0016853;GO:0016859;GO:0140096				3	3	3	16	16	16	20.822	0	3.515	7346000	6	6	A0A0R0GPD7;I1L950;C6SWU7;C6TKI6	A0A0R0GPD7;I1L950;C6SWU7;C6TKI6	194	GLYMA_10G063800;GLYMA_13G148400	KRH19991;KRH32614	KRH19991;KRH32614
20.9115	19.5902	18.6226	17.1552	19.9107	19.5266	16.9237	18.0519	18.0541	22.0086	18.8048	19.2106				-1		amide biosynthetic process;amide metabolic process;biosynthetic process;cellular biosynthetic process;cellular metabolic process;cellular nitrogen compound biosynthetic process;cellular nitrogen compound metabolic process;cellular process;macromolecule biosynthetic process;macromolecule metabolic process;metabolic process;nitrogen compound metabolic process;organic substance biosynthetic process;…	binding;nucleic acid binding;organic cyclic compound binding;RNA binding;rRNA binding;structural constituent of ribosome;structural molecule activity	cellular anatomical entity;cytosolic small ribosomal subunit;intracellular non-membrane-bounded organelle;intracellular organelle;non-membrane-bounded organelle;organelle;protein-containing complex;ribonucleoprotein complex;ribosomal subunit;ribosome;small ribosomal subunit	amide metabolic process;biosynthetic process;cellular nitrogen compound metabolic process;cellular process;macromolecule biosynthetic process;macromolecule metabolic process;metabolic process;nitrogen compound metabolic process;peptide metabolic process;primary metabolic process;protein metabolic process;translation	cellular anatomical entity;intracellular non-membrane-bounded organelle;intracellular organelle;non-membrane-bounded organelle;organelle;protein-containing complex;ribonucleoprotein complex;ribosome;small ribosomal subunit		Ribosomal_S17;Ribosomal_S17_N	ABE_INNER_EAR;CARRILLOREIXACH_HEPATOBLASTOMA_VS_NORMAL_UP;DIAZ_CHRONIC_MYELOGENOUS_LEUKEMIA_DN;DIRMEIER_LMP1_RESPONSE_LATE_DN;ENK_UV_RESPONSE_KERATINOCYTE_UP;HILLION_HMGA1_TARGETS;HILLION_HMGA1B_TARGETS;HOLLEMAN_VINCRISTINE_RESISTANCE_B_ALL_DN;HSIAO_HOUSEKEEPING_GENES;KEGG_MEDICUS_PATHOGEN_SARS_COV_2_NSP1_TO_TRANSLATION_INITIATION;KEGG_MEDICUS_REFERENCE_TRANSLATION_INITIATION;KEGG_RIBOSOME;KIM_AL…	Referenceproteome;Ribonucleoprotein;Ribosomalprotein;RNA-binding;rRNA-binding		GO:0006412;GO:0006518;GO:0006807;GO:0008152;GO:0009058;GO:0009059;GO:0009987;GO:0019538;GO:0034641;GO:0043043;GO:0043170;GO:0043603;GO:0043604;GO:0044237;GO:0044238;GO:0044249;GO:0044271;GO:0071704;GO:1901564;GO:1901566;GO:1901576	GO:0003676;GO:0003723;GO:0003735;GO:0005198;GO:0005488;GO:0019843;GO:0097159	GO:0005840;GO:0015935;GO:0022627;GO:0032991;GO:0043226;GO:0043228;GO:0043229;GO:0043232;GO:0044391;GO:0110165;GO:1990904	GO:0006412;GO:0006518;GO:0006807;GO:0008152;GO:0009058;GO:0009059;GO:0009987;GO:0019538;GO:0034641;GO:0043170;GO:0043603;GO:0044238	GO:0005840;GO:0015935;GO:0032991;GO:0043226;GO:0043228;GO:0043229;GO:0043232;GO:0110165;GO:1990904	6	6	6	42.3	42.3	42.3	14.858	0	9.0132	17895000	24	2	A0A0R0GPK2;P17093;I1MU00;C6SVJ4;I1LZW2;K7K318;C6T0V5;C6T065;K7LCS7	A0A0R0GPK2;P17093;I1MU00;C6SVJ4;I1LZW2	195	GLYMA_13G165200;GLYMA_17G105900	KRH03569;KRH20240;KRH20241;KRH20242	KRH03569;KRH20240;KRH20241;KRH20242
24.907	24.9421	24.4689	25.1167	24.7706	24.8076	24.9242	23.8018	23.8041	24.7823	25.2619	24.5				-1		metabolic process;pigment biosynthetic process;pigment metabolic process	binding;catalytic activity;catechol oxidase activity;cation binding;ion binding;metal ion binding;monooxygenase activity;oxidoreductase activity;oxidoreductase activity, acting on diphenols and related substances as donors;oxidoreductase activity, acting on diphenols and related substances as donors, oxygen as acceptor		metabolic process;pigment metabolic process			PPO1_DWL;PPO1_KFDV;Tyrosinase		Copper;Disulfidebond;Metal-binding;Oxidoreductase;Referenceproteome;Thioetherbond		GO:0008152;GO:0042440;GO:0046148	GO:0003824;GO:0004097;GO:0004497;GO:0005488;GO:0016491;GO:0016679;GO:0016682;GO:0043167;GO:0043169;GO:0046872		GO:0008152;GO:0042440		16	16	12	27.7	27.7	21.1	69.586	0	189.24	1304100000	584	0	A0A0R0GQB4;A0A368UH97	A0A0R0GQB4;A0A368UH97	197	GLYMA_13G183000;GLYMA_13G183500	KRH20508;RCW19089	KRH20508;RCW19089
16.2226	16.4663	17.4152	15.9582	16.0796	16.9726	16.4199	17.644	17.6462	15.0607	13.8025	17.2134				-1		alcohol metabolic process;carbohydrate metabolic process;carboxylic acid metabolic process;cellular aldehyde metabolic process;cellular aromatic compound metabolic process;cellular metabolic process;cellular nitrogen compound metabolic process;cellular process;glyoxylate cycle;glyoxylate metabolic process;heterocycle metabolic process;isocitrate metabolic process;metabolic process;monocarboxylic …	adenyl nucleotide binding;binding;catalytic activity;cation binding;heterocyclic compound binding;ion binding;isocitrate dehydrogenase (NADP+) activity;isocitrate dehydrogenase [NAD(P)+] activity;magnesium ion binding;metal ion binding;NAD binding;nucleoside phosphate binding;nucleotide binding;organic cyclic compound binding;oxidoreductase activity;oxidoreductase activity, acting on CH-OH group …	cellular anatomical entity;intracellular membrane-bounded organelle;intracellular organelle;membrane-bounded organelle;mitochondrion;organelle	alcohol metabolic process;carbohydrate metabolic process;cellular aldehyde metabolic process;cellular aromatic compound metabolic process;cellular nitrogen compound metabolic process;cellular process;heterocycle metabolic process;metabolic process;monocarboxylic acid metabolic process;nitrogen compound metabolic process;nucleobase-containing compound metabolic process;nucleobase-containing small …	cellular anatomical entity;intracellular membrane-bounded organelle;intracellular organelle;mitochondrion;organelle		Iso_dh	ACEVEDO_LIVER_TUMOR_VS_NORMAL_ADJACENT_TISSUE_UP;AFFAR_YY1_TARGETS_DN;BERENJENO_TRANSFORMED_BY_RHOA_DN;BHATTACHARYA_EMBRYONIC_STEM_CELL;BOCHKIS_FOXA2_TARGETS;BURTON_ADIPOGENESIS_PEAK_AT_0HR;CHEN_LVAD_SUPPORT_OF_FAILING_HEART_DN;CHYLA_CBFA2T3_TARGETS_UP;COULOUARN_TEMPORAL_TGFB1_SIGNATURE_DN;CREIGHTON_ENDOCRINE_THERAPY_RESISTANCE_3;DEBIASI_APOPTOSIS_BY_REOVIRUS_INFECTION_DN;DODD_NASOPHARYNGEAL_CARC…	Cytoplasm;Glyoxylatebypass;Magnesium;Manganese;Metal-binding;NADP;Oxidoreductase;Referenceproteome;Tricarboxylicacidcycle		GO:0005975;GO:0006066;GO:0006081;GO:0006082;GO:0006097;GO:0006099;GO:0006102;GO:0006139;GO:0006163;GO:0006725;GO:0006739;GO:0006753;GO:0006793;GO:0006796;GO:0006807;GO:0008152;GO:0009117;GO:0009987;GO:0019362;GO:0019637;GO:0019752;GO:0032787;GO:0034641;GO:0043436;GO:0044237;GO:0044238;GO:0044281;GO:0046483;GO:0046487;GO:0046496;GO:0055086;GO:0071704;GO:0072350;GO:0072521;GO:0072524;GO:1901360;GO:…	GO:0000166;GO:0000287;GO:0003824;GO:0004448;GO:0004450;GO:0005488;GO:0016491;GO:0016614;GO:0016616;GO:0017076;GO:0030554;GO:0036094;GO:0043167;GO:0043169;GO:0046872;GO:0051287;GO:0097159;GO:1901265;GO:1901363	GO:0005739;GO:0043226;GO:0043227;GO:0043229;GO:0043231;GO:0110165	GO:0005975;GO:0006066;GO:0006081;GO:0006082;GO:0006139;GO:0006725;GO:0006793;GO:0006807;GO:0008152;GO:0009117;GO:0009987;GO:0032787;GO:0034641;GO:0044238;GO:0044281;GO:0046483;GO:0055086	GO:0005739;GO:0043226;GO:0043229;GO:0043231;GO:0110165	9	1	1	27.6	4.8	4.8	46.049	0.00082508	2.3999	1327700	8	1	Q06197;A0A0R0GQK7;C6TAD3;O82585;I1MJH1;C6TGV2;A0A0R0ESD5;A0A0R0EGP0;A0A0R0GGB5;A0A0R0IMT3	Q06197;A0A0R0GQK7	198	GLYMA_14G211000	KRH17285	KRH17285
16.8282	18.2895	17.7507	17.9826	17.8225	17.9677	18.0963	17.5385	17.5407	18.376	17.9466	17.4767				-1		response to stimulus;response to stress	binding;calcium ion binding;calcium-dependent phospholipid binding;cation binding;ion binding;lipid binding;metal ion binding;phospholipid binding	cellular anatomical entity;cytoplasm	response to stimulus;response to stress	cellular anatomical entity;cytoplasm		Annexin		Annexin;Referenceproteome		GO:0006950;GO:0050896	GO:0005488;GO:0005509;GO:0005543;GO:0005544;GO:0008289;GO:0043167;GO:0043169;GO:0046872	GO:0005737;GO:0110165	GO:0006950;GO:0050896	GO:0005737;GO:0110165	1	1	1	9.5	9.5	9.5	25.549	0	3.2734	2834600	33	0	C6TD05;I1MIU3;A0A0R0GR41;I1M0V2;D6QX28	C6TD05;I1MIU3;A0A0R0GR41;I1M0V2;D6QX28	199	GLYMA_13G200000;GLYMA_15G238400	KRH13431;KRH13433;KRH20780;KRH20781	KRH13431;KRH13433;KRH20780;KRH20781
16.0519	17.7207	15.2202	17.8442	16.9237	15.9768	17.0764	16.0403	16.486	18.9514	17.569	18.1982				-1			binding;catalytic activity;catalytic activity, acting on a protein;cation binding;dipeptidyl-peptidase activity;exopeptidase activity;hydrolase activity;hydrolase activity, acting on ester bonds;ion binding;metal ion binding;peptidase activity;phosphatase activity;phosphoric ester hydrolase activity	cellular anatomical entity;cytoplasm		cellular anatomical entity;cytoplasm		NUDIX;Peptidase_M49		Hydrolase;Metal-binding;Referenceproteome			GO:0003824;GO:0005488;GO:0008233;GO:0008238;GO:0008239;GO:0016787;GO:0016788;GO:0016791;GO:0042578;GO:0043167;GO:0043169;GO:0046872;GO:0140096	GO:0005737;GO:0110165		GO:0005737;GO:0110165	2	2	2	3.3	3.3	3.3	72.596	0	2.9409	1884400	5	6	A0A0R0GRC9	A0A0R0GRC9	200	GLYMA_13G072500	KRH18626	KRH18626
17.7256	18.3215	18.7305	17.9594	18.5612	19.0846	18.2363	19.8204	19.5024	18.1526	18.082	19.6119				-1			anion binding;binding;carbohydrate derivative binding;catalytic activity;FMN binding;heterocyclic compound binding;ion binding;NAD(P)H dehydrogenase (quinone) activity;nucleoside phosphate binding;nucleotide binding;organic cyclic compound binding;oxidoreductase activity;oxidoreductase activity, acting on NAD(P)H;oxidoreductase activity, acting on NAD(P)H, quinone or similar compound as acceptor;…	cellular anatomical entity;membrane		cellular anatomical entity;membrane		FMN_red		Referenceproteome			GO:0000166;GO:0003824;GO:0003955;GO:0005488;GO:0010181;GO:0016491;GO:0016651;GO:0016655;GO:0032553;GO:0036094;GO:0043167;GO:0043168;GO:0097159;GO:0097367;GO:1901265;GO:1901363	GO:0016020;GO:0110165		GO:0016020;GO:0110165	4	4	4	35	35	35	22.071	0	13.285	7308500	10	0	A0A0R0GRT9;C6TND2	A0A0R0GRT9;C6TND2	201	GLYMA_14G192700	KRH17021;KRH17022;KRH17023	KRH17021;KRH17022;KRH17023
23.6853	23.1305	23.3153	23.3316	23.1859	23.2943	23.2684	22.9069	22.9091	24.1542	23.5899	23.5234				-1		biological regulation;cellular process;regulation of biological process;regulation of cellular process;signal transduction		cellular anatomical entity;cytoplasm	biological regulation;cellular process;regulation of biological process;signal transduction	cellular anatomical entity;cytoplasm		2014-03-03		Coiledcoil;Referenceproteome		GO:0007165;GO:0009987;GO:0050789;GO:0050794;GO:0065007		GO:0005737;GO:0110165	GO:0007165;GO:0009987;GO:0050789;GO:0065007	GO:0005737;GO:0110165	15	7	7	62.1	29.5	29.5	29.282	0	112.56	334540000	186	0	A0A0R4J5A5;C6TGW2;A0A0R0GRY6;A0A0R0L4C1;O81976;A0A0R0FS69	A0A0R4J5A5;C6TGW2;A0A0R0GRY6;A0A0R0L4C1	202	GLYMA_02G208700;GLYMA_14G176900	KRH16772;KRH16773;KRH72385;KRH72386	KRH16772;KRH16773;KRH72385;KRH72386
20.1024	20.2279	19.9703	20.149	16.6279	20.7042	19.8919	15.6788	16.7401	19.4486	20.3576	19.3783				-1		biological regulation;regulation of biological process;regulation of cellular metabolic process;regulation of cellular process;regulation of macromolecule metabolic process;regulation of metabolic process;regulation of nitrogen compound metabolic process;regulation of nucleobase-containing compound metabolic process;regulation of primary metabolic process;regulation of RNA metabolic process	4-hydroxy-4-methyl-2-oxoglutarate aldolase activity;binding;carbon-carbon lyase activity;carboxy-lyase activity;catalytic activity;cation binding;enzyme inhibitor activity;enzyme regulator activity;ion binding;lyase activity;metal ion binding;molecular function inhibitor activity;molecular function regulator activity;nuclease inhibitor activity;oxaloacetate decarboxylase activity;oxo-acid-lyase a…		biological regulation;regulation of biological process;regulation of metabolic process			RraA-like		Lyase;Metal-binding;Referenceproteome		GO:0019219;GO:0019222;GO:0031323;GO:0050789;GO:0050794;GO:0051171;GO:0051252;GO:0060255;GO:0065007;GO:0080090	GO:0003824;GO:0004857;GO:0005488;GO:0008428;GO:0008948;GO:0016829;GO:0016830;GO:0016831;GO:0016833;GO:0030234;GO:0043167;GO:0043169;GO:0046872;GO:0047443;GO:0098772;GO:0140678;GO:0140721		GO:0019222;GO:0050789;GO:0065007		6	5	3	48.2	42.8	31.3	17.588	0	14.803	15130000	18	3	A0A0R0GTN8;C6TFH9;I1M2G9	A0A0R0GTN8;C6TFH9;I1M2G9	203	GLYMA_13G250900	KRH21645;KRH21646	KRH21645;KRH21646
19.547	20.5981	20.2825	20.1453	20.3056	20.6534	20.5757	20.3538	20.3561	20.3487	20.6158	20.4388				-1		macromolecule metabolic process;metabolic process;nitrogen compound metabolic process;organic substance metabolic process;organonitrogen compound metabolic process;primary metabolic process;protein metabolic process;protein repair;response to oxidative stress;response to stimulus;response to stress	binding;catalytic activity;cation binding;ion binding;metal ion binding;oxidoreductase activity;oxidoreductase activity, acting on a sulfur group of donors;oxidoreductase activity, acting on a sulfur group of donors, disulfide as acceptor;peptide-methionine (R)-S-oxide reductase activity		macromolecule metabolic process;metabolic process;nitrogen compound metabolic process;primary metabolic process;protein metabolic process;response to oxidative stress;response to stimulus;response to stress			SelR		Calcium;Electrontransport;Metal-binding;Oxidoreductase;Redox-activecenter;Referenceproteome;Transport;Zinc		GO:0006807;GO:0006950;GO:0006979;GO:0008152;GO:0019538;GO:0030091;GO:0043170;GO:0044238;GO:0050896;GO:0071704;GO:1901564	GO:0003824;GO:0005488;GO:0016491;GO:0016667;GO:0016671;GO:0033743;GO:0043167;GO:0043169;GO:0046872		GO:0006807;GO:0006950;GO:0006979;GO:0008152;GO:0019538;GO:0043170;GO:0044238;GO:0050896		6	6	5	32.7	32.7	24.3	21.752	0	11.551	36938000	63	0	C6TIU1;A0A0R0GU41;C6SZE1;I1ME37;I1M186;I1ME38	C6TIU1;A0A0R0GU41;C6SZE1;I1ME37	204	GLYMA_13G253800;GLYMA_15G061100	KRH10659;KRH21686	KRH10659;KRH21686
24.2308	25.1063	24.7777	25.5768	24.9106	25.1975	25.6179	25.2035	25.1886	24.7855	25.4989	24.9487				-1		cellular aromatic compound metabolic process;cellular metabolic process;cellular modified amino acid metabolic process;cellular process;folic acid-containing compound metabolic process;heterocycle metabolic process;metabolic process;nitrogen compound metabolic process;organic cyclic compound metabolic process;organic substance metabolic process;organonitrogen compound metabolic process;pteridine-…	catalytic activity;catalytic activity, acting on a protein;cysteine-type peptidase activity;gamma-glutamyl-peptidase activity;hydrolase activity;omega peptidase activity;peptidase activity	cellular anatomical entity;intracellular membrane-bounded organelle;intracellular organelle;membrane-bounded organelle;organelle;vacuole	cellular aromatic compound metabolic process;cellular modified amino acid metabolic process;cellular process;heterocycle metabolic process;metabolic process;nitrogen compound metabolic process	cellular anatomical entity;intracellular membrane-bounded organelle;intracellular organelle;organelle;vacuole				Referenceproteome		GO:0006575;GO:0006725;GO:0006760;GO:0006807;GO:0008152;GO:0009987;GO:0042558;GO:0044237;GO:0046483;GO:0046900;GO:0071704;GO:1901360;GO:1901564	GO:0003824;GO:0008233;GO:0008234;GO:0008242;GO:0016787;GO:0034722;GO:0140096	GO:0005773;GO:0043226;GO:0043227;GO:0043229;GO:0043231;GO:0110165	GO:0006575;GO:0006725;GO:0006807;GO:0008152;GO:0009987;GO:0046483	GO:0005773;GO:0043226;GO:0043229;GO:0043231;GO:0110165	16	16	3	77.1	77.1	20.6	19.891	0	230.81	2631500000	924	0	A0A0R0GUI6	A0A0R0GUI6	205	GLYMA_13G267900	KRH21930	KRH21930
16.0981	16.7559	15.941	16.7986	16.7913	16.7227	16.6382	16.3925	16.5986	15.8478	14.7724	16.7599				-1			binding;cation binding;ion binding;manganese ion binding;metal ion binding;transition metal ion binding	apoplast;cellular anatomical entity;endoplasmic reticulum;extracellular region;intracellular membrane-bounded organelle;intracellular organelle;membrane-bounded organelle;organelle;plant-type vacuole;protein storage vacuole;storage vacuole;vacuole		cellular anatomical entity;endoplasmic reticulum;extracellular region;intracellular membrane-bounded organelle;intracellular organelle;organelle;vacuole		Cupin_1		Apoplast;Glycoprotein;Manganese;Metal-binding;Referenceproteome;Secreted;Signal			GO:0005488;GO:0030145;GO:0043167;GO:0043169;GO:0046872;GO:0046914	GO:0000322;GO:0000325;GO:0000326;GO:0005576;GO:0005773;GO:0005783;GO:0043226;GO:0043227;GO:0043229;GO:0043231;GO:0048046;GO:0110165		GO:0005576;GO:0005773;GO:0005783;GO:0043226;GO:0043229;GO:0043231;GO:0110165	2	1	1	12	7.8	7.8	22.665	0	7.558	600560	15	5	A0A0R0GUX4	A0A0R0GUX4	207	GLYMA_13G109900	KRH19305	KRH19305
20.3317	19.3581	19.6049	17.309	19.2785	14.7205	17.0474	18.3051	18.3068	21.2625	19.1712	18.1681				-1		amide biosynthetic process;amide metabolic process;biosynthetic process;cellular biosynthetic process;cellular metabolic process;cellular nitrogen compound biosynthetic process;cellular nitrogen compound metabolic process;cellular process;cytoplasmic translation;macromolecule biosynthetic process;macromolecule metabolic process;metabolic process;nitrogen compound metabolic process;organic substan…	binding;mRNA binding;nucleic acid binding;organic cyclic compound binding;RNA binding;structural constituent of ribosome;structural molecule activity	cellular anatomical entity;cytosolic large ribosomal subunit;large ribosomal subunit;membrane;protein-containing complex;ribonucleoprotein complex;ribosomal subunit	amide metabolic process;biosynthetic process;cellular nitrogen compound metabolic process;cellular process;cytoplasmic translation;macromolecule biosynthetic process;macromolecule metabolic process;metabolic process;nitrogen compound metabolic process;peptide metabolic process;primary metabolic process;protein metabolic process;translation	cellular anatomical entity;membrane;protein-containing complex;ribonucleoprotein complex		Ribosomal_L24e		Membrane;Referenceproteome;Transmembrane;Transmembranehelix		GO:0002181;GO:0006412;GO:0006518;GO:0006807;GO:0008152;GO:0009058;GO:0009059;GO:0009987;GO:0019538;GO:0034641;GO:0043043;GO:0043170;GO:0043603;GO:0043604;GO:0044237;GO:0044238;GO:0044249;GO:0044271;GO:0071704;GO:1901564;GO:1901566;GO:1901576	GO:0003676;GO:0003723;GO:0003729;GO:0003735;GO:0005198;GO:0005488;GO:0097159	GO:0015934;GO:0016020;GO:0022625;GO:0032991;GO:0044391;GO:0110165;GO:1990904	GO:0002181;GO:0006412;GO:0006518;GO:0006807;GO:0008152;GO:0009058;GO:0009059;GO:0009987;GO:0019538;GO:0034641;GO:0043170;GO:0043603;GO:0044238	GO:0016020;GO:0032991;GO:0110165;GO:1990904	1	1	1	10.8	10.8	10.8	13.252	0	5.1374	7809600	4	3	A0A0R0IYK3;A0A0R0GV71;I1NAH4;I1L981;I1JPV1;C6TFG4;C6SZ00;C6SXT2;C6SVV1	A0A0R0IYK3;A0A0R0GV71;I1NAH4;I1L981;I1JPV1;C6TFG4;C6SZ00;C6SXT2;C6SVV1	208	GLYMA_03G189300;GLYMA_08G272900;GLYMA_10G066500;GLYMA_13G151600;GLYMA_19G189600	KRG96105;KRG96106;KRH20034;KRH32657;KRH45459;KRH67811	KRG96105;KRG96106;KRH20034;KRH32657;KRH45459;KRH67811
17.2358	16.1581	16.1349	15.8576	15.9152	16.0264	16.1955	17.253	17.2552	16.3464	16.6738	16.9065				-1								GST_N_3		Referenceproteome							1	1	1	4.2	4.2	4.2	37.589	0	21.925	1457700	45	0	A0A0R0GW40	A0A0R0GW40	210	GLYMA_13G154000	KRH20067	KRH20067
21.0965	22.0204	21.4905	21.7288	22.1719	21.2372	20.7782	20.9409	20.9431	21.505	20.4622	21.7898				-1			anion binding;binding;ion binding;lipid binding;phosphatidic acid binding;phospholipid binding							Referenceproteome			GO:0005488;GO:0005543;GO:0008289;GO:0043167;GO:0043168;GO:0070300				16	16	8	61.3	61.3	32.5	42.74	0	120.41	114840000	231	0	A0A0R0GW88	A0A0R0GW88	212	GLYMA_13G061100	KRH18452	KRH18452
19.9977	20.2978	20.1428	19.8423	20.6479	20.4677	19.624	20.028	20.0303	19.4944	19.9042	20.4632				-1			4 iron, 4 sulfur cluster binding;binding;catalytic activity;cation binding;electron transfer activity;ferredoxin-thioredoxin reductase activity;ion binding;iron-sulfur cluster binding;metal cluster binding;metal ion binding;oxidoreductase activity;oxidoreductase activity, acting on a sulfur group of donors;oxidoreductase activity, acting on a sulfur group of donors, iron-sulfur protein as accepto…	cellular anatomical entity;chloroplast;intracellular membrane-bounded organelle;intracellular organelle;membrane-bounded organelle;organelle;plastid		cellular anatomical entity;chloroplast;intracellular membrane-bounded organelle;intracellular organelle;organelle;plastid		FeThRed_B		4Fe-4S;Chloroplast;Disulfidebond;Iron;Iron-sulfur;Metal-binding;Oxidoreductase;Plastid;Redox-activecenter;Referenceproteome;Transitpeptide			GO:0003824;GO:0005488;GO:0009055;GO:0016491;GO:0016667;GO:0016673;GO:0016730;GO:0043167;GO:0043169;GO:0046872;GO:0051536;GO:0051539;GO:0051540;GO:0103012	GO:0009507;GO:0009536;GO:0043226;GO:0043227;GO:0043229;GO:0043231;GO:0110165		GO:0009507;GO:0009536;GO:0043226;GO:0043229;GO:0043231;GO:0110165	5	5	5	32.1	32.1	32.1	15.684	0	9.5685	32387000	34	0	I1N5X6;O49856;I1N5X5;A0A0R0GWL3;C6SYH4	I1N5X6;O49856;I1N5X5;A0A0R0GWL3;C6SYH4	214	GLYMA_13G069100;GLYMA_19G013800	KRG93406;KRG93407;KRH18580	KRG93406;KRG93407;KRH18580
21.1272	22.1006	21.747	22.0212	21.9114	22.1202	21.7033	20.4721	20.5624	20.9203	21.1458	21.427				-1				cellular anatomical entity;membrane;plasma membrane		cellular anatomical entity;membrane;plasma membrane		Fasciclin		Referenceproteome;Signal				GO:0005886;GO:0016020;GO:0110165		GO:0005886;GO:0016020;GO:0110165	8	8	2	40.8	40.8	16.4	26.559	0	71.104	81409000	120	0	C6T5L7;A0A0R0GWM0	C6T5L7;A0A0R0GWM0	215	GLYMA_13G293500	KRH22327	KRH22327
19.4669	19.9606	19.788	20.1716	20.9191	19.3461	20.1954	18.0556	18.9499	20.2616	20.721	19.5702				-1			binding;mRNA binding;nucleic acid binding;organic cyclic compound binding;RNA binding	cellular anatomical entity;cytosol		cellular anatomical entity;cytosol		RRM_1		Referenceproteome;RNA-binding			GO:0003676;GO:0003723;GO:0003729;GO:0005488;GO:0097159	GO:0005829;GO:0110165		GO:0005829;GO:0110165	5	5	2	13.4	13.4	4.4	45.167	0	26.408	19709000	53	1	A0A0R0GYR7;I1M112;I1KLY0;I1JEW3	A0A0R0GYR7;I1M112	218	GLYMA_13G205600	KRH20867;KRH20868	KRH20867;KRH20868
20.2199	19.5616	18.9608	19.322	18.8711	19.9136	19.0482	19.4494	19.4517	20.9736	20.2498	19.577				-1		amide biosynthetic process;amide metabolic process;biosynthetic process;cellular biosynthetic process;cellular metabolic process;cellular nitrogen compound biosynthetic process;cellular nitrogen compound metabolic process;cellular process;macromolecule biosynthetic process;macromolecule metabolic process;metabolic process;nitrogen compound metabolic process;organic substance biosynthetic process;…	binding;nucleic acid binding;organic cyclic compound binding;RNA binding;rRNA binding;structural constituent of ribosome;structural molecule activity	cellular anatomical entity;intracellular non-membrane-bounded organelle;intracellular organelle;non-membrane-bounded organelle;organelle;protein-containing complex;ribonucleoprotein complex;ribosome	amide metabolic process;biosynthetic process;cellular nitrogen compound metabolic process;cellular process;macromolecule biosynthetic process;macromolecule metabolic process;metabolic process;nitrogen compound metabolic process;peptide metabolic process;primary metabolic process;protein metabolic process;translation	cellular anatomical entity;intracellular non-membrane-bounded organelle;intracellular organelle;non-membrane-bounded organelle;organelle;protein-containing complex;ribonucleoprotein complex;ribosome		Ribosomal_S17		Referenceproteome;Ribonucleoprotein;Ribosomalprotein;RNA-binding;rRNA-binding		GO:0006412;GO:0006518;GO:0006807;GO:0008152;GO:0009058;GO:0009059;GO:0009987;GO:0019538;GO:0034641;GO:0043043;GO:0043170;GO:0043603;GO:0043604;GO:0044237;GO:0044238;GO:0044249;GO:0044271;GO:0071704;GO:1901564;GO:1901566;GO:1901576	GO:0003676;GO:0003723;GO:0003735;GO:0005198;GO:0005488;GO:0019843;GO:0097159	GO:0005840;GO:0032991;GO:0043226;GO:0043228;GO:0043229;GO:0043232;GO:0110165;GO:1990904	GO:0006412;GO:0006518;GO:0006807;GO:0008152;GO:0009058;GO:0009059;GO:0009987;GO:0019538;GO:0034641;GO:0043170;GO:0043603;GO:0044238	GO:0005840;GO:0032991;GO:0043226;GO:0043228;GO:0043229;GO:0043232;GO:0110165;GO:1990904	5	5	3	33	33	23.3	20.393	0	7.6833	19956000	23	0	A0A0R0GYV0	A0A0R0GYV0	219	GLYMA_13G357200	KRH23436	KRH23436
20.103	20.6113	20.9047	20.375	21.0835	20.5941	20.5588	20.9316	20.9338	20.0066	21.2921	20.662				-1			amino acid binding;anion binding;binding;carboxylic acid binding;ion binding;organic acid binding;small molecule binding							Referenceproteome;Repeat			GO:0005488;GO:0016597;GO:0031406;GO:0036094;GO:0043167;GO:0043168;GO:0043177				8	2	2	37.4	11.9	11.9	24.998	0	22.232	25952000	25	0	A0A0R0GZ48;I1M5Y7	A0A0R0GZ48;I1M5Y7	220	GLYMA_13G370200	KRH23644;KRH23645	KRH23644;KRH23645
19.8266	21.385	20.793	21.4121	21.7734	20.9765	21.1485	21.1726	21.1748	21.4945	20.4347	19.8765				-1			binding;DNA binding;nucleic acid binding;organic cyclic compound binding	cellular anatomical entity;intracellular membrane-bounded organelle;intracellular organelle;membrane-bounded organelle;nucleus;organelle		cellular anatomical entity;intracellular membrane-bounded organelle;intracellular organelle;nucleus;organelle		MBD		DNA-binding;Nucleus;Referenceproteome;Transcription;Transcriptionregulation			GO:0003676;GO:0003677;GO:0005488;GO:0097159	GO:0005634;GO:0043226;GO:0043227;GO:0043229;GO:0043231;GO:0110165		GO:0005634;GO:0043226;GO:0043229;GO:0043231;GO:0110165	10	6	6	42.4	27.5	27.5	29.849	0	27.879	45769000	60	0	A0A0R0GZ86;I1M5U1;C6THR2	A0A0R0GZ86;I1M5U1;C6THR2	221	GLYMA_13G365500	KRH23579;KRH23580	KRH23579;KRH23580
21.7463	21.9213	22.0862	22.6807	22.3768	21.8266	22.1323	21.0965	21.2359	23.3047	21.8572	21.8114				-1		response to stimulus;response to stress	binding;calcium ion binding;calcium-dependent phospholipid binding;cation binding;ion binding;lipid binding;metal ion binding;phospholipid binding	cellular anatomical entity;cytoplasm	response to stimulus;response to stress	cellular anatomical entity;cytoplasm		Annexin		Annexin;Calcium;Calcium/phospholipid-binding;Referenceproteome;Repeat		GO:0006950;GO:0050896	GO:0005488;GO:0005509;GO:0005543;GO:0005544;GO:0008289;GO:0043167;GO:0043169;GO:0046872	GO:0005737;GO:0110165	GO:0006950;GO:0050896	GO:0005737;GO:0110165	18	18	5	63.9	63.9	20.8	35.765	0	50.273	162680000	160	0	A0A0R0GZF0;C6THM9;A0A0R0GR76;I1LLC1;I1LLC0;C6T7M2;A0A0R4J4L3;K7MDH7;I1JWG6	A0A0R0GZF0;C6THM9;A0A0R0GR76	222	GLYMA_13G199800	KRH20777;KRH20778	KRH20777;KRH20778
19.45	19.5349	20.6251	19.9258	21.4945	20.3599	20.8097	20.8679	20.87	21.1474	20.5127	19.9408				-1		cellular metabolic process;cellular process;metabolic process;phosphate-containing compound metabolic process;phosphorus metabolic process	binding;catalytic activity;cation binding;hydrolase activity;hydrolase activity, acting on acid anhydrides;hydrolase activity, acting on acid anhydrides, in phosphorus-containing anhydrides;inorganic diphosphate phosphatase activity;ion binding;magnesium ion binding;metal ion binding;pyrophosphatase activity	cellular anatomical entity;cytoplasm;cytosol	cellular process;metabolic process;phosphorus metabolic process	cellular anatomical entity;cytoplasm;cytosol		Pyrophosphatase		Hydrolase;Magnesium;Metal-binding;Referenceproteome		GO:0006793;GO:0006796;GO:0008152;GO:0009987;GO:0044237	GO:0000287;GO:0003824;GO:0004427;GO:0005488;GO:0016462;GO:0016787;GO:0016817;GO:0016818;GO:0043167;GO:0043169;GO:0046872	GO:0005737;GO:0005829;GO:0110165	GO:0006793;GO:0008152;GO:0009987	GO:0005737;GO:0005829;GO:0110165	3	2	1	20.7	14.5	5.7	22.107	0	5.0828	20667000	21	0	I1LYV4;I1LYV5;C6T497;A0A0R0GZH8;I1L8L8;A0A0R0HPA5;C6SY00;A0A0R0FVN7	I1LYV4;I1LYV5;C6T497;A0A0R0GZH8;I1L8L8;A0A0R0HPA5;C6SY00	223	GLYMA_10G044700;GLYMA_13G132400	KRH19727;KRH19728;KRH19729;KRH19730;KRH32318;KRH32319	KRH19727;KRH19728;KRH19729;KRH19730;KRH32318;KRH32319
14.1061	14.4769	14.0885	14.9732	14.2099	14.0163	16.9621	15.7512	13.3211	13.9915	15.6702	14.1769				-1		cellular process;protein folding	binding;protein binding;protein-folding chaperone binding		cellular process;protein folding			BAG		Coiledcoil;Referenceproteome		GO:0006457;GO:0009987	GO:0005488;GO:0005515;GO:0051087		GO:0006457;GO:0009987		1	1	1	5	5	5	45.732	0.00082713	2.4128	156110	9	3	A0A0R0GZS9;A0A0R4J460	A0A0R0GZS9;A0A0R4J460	225	GLYMA_09G231200;GLYMA_12G005300	KRH23808;KRH39973	KRH23808;KRH39973
23.3515	24.28	24.2902	24.2241	24.2986	23.9843	24.3553	23.049	23.0513	23.7717	22.7054	23.4372				-1			binding;cation binding;ion binding;metal ion binding;nucleic acid binding;organic cyclic compound binding;transition metal ion binding;zinc ion binding					CSD;zf-CCHC		Metal-binding;Referenceproteome;Zinc;Zinc-finger			GO:0003676;GO:0005488;GO:0008270;GO:0043167;GO:0043169;GO:0046872;GO:0046914;GO:0097159				3	3	1	46	46	17.7	12.489	0	108.88	210540000	109	0	A0A0R0H1B4;I1LPN9;A0A0R0HE23;I1LPP5;I1LPP1;A0A0R0HA46;A0A0R0H7G6;I1LPP4;A0A0R0H1C8;I1LPP3;I1LPP2;I1LPP8;A0A0R0HAU0;I1LPN8;I1LPQ5;I1LPP7;A0A0R0H0S7;I1LPQ3;I1LPQ1;A0A0R0H0T1;A0A0R0H0K3;I1LPQ4;A0A0R0HA70;A0A0R0H0X7;A0A0R0H9C1;I1LPN7	A0A0R0H1B4;I1LPN9;A0A0R0HE23;I1LPP5;I1LPP1;A0A0R0HA46;A0A0R0H7G6;I1LPP4;A0A0R0H1C8;I1LPP3;I1LPP2;I1LPP8;A0A0R0HAU0;I1LPN8;I1LPQ5;I1LPP7;A0A0R0H0S7;I1LPQ3;I1LPQ1;A0A0R0H0T1;A0A0R0H0K3;I1LPQ4;A0A0R0HA70;A0A0R0H0X7;A0A0R0H9C1;I1LPN7	226	GLYMA_12G030800	KRH24256;KRH24257;KRH24258;KRH24259;KRH24260;KRH24261;KRH24262;KRH24263;KRH24264;KRH24265;KRH24266;KRH24267;KRH24268;KRH24269;KRH24270;KRH24271;KRH24272;KRH24273;KRH24274;KRH24275;KRH24276;KRH24277;KRH24278;KRH24279;KRH24280;KRH24281;KRH24282;KRH24283	KRH24256;KRH24257;KRH24258;KRH24259;KRH24260;KRH24261;KRH24262;KRH24263;KRH24264;KRH24265;KRH24266;KRH24267;KRH24268;KRH24269;KRH24270;KRH24271;KRH24272;KRH24273;KRH24274;KRH24275;KRH24276;KRH24277;KRH24278;KRH24279;KRH24280;KRH24281;KRH24282;KRH24283
15.6439	18.0536	19.9173	19.9953	19.7087	18.8426	19.9181	17.1164	16.8752	20.2305	16.945	16.7798				-1		response to stimulus;response to stress	binding;calcium ion binding;calcium-dependent phospholipid binding;cation binding;ion binding;lipid binding;metal ion binding;phospholipid binding	cellular anatomical entity;cytoplasm	response to stimulus;response to stress	cellular anatomical entity;cytoplasm		Annexin		Annexin;Calcium;Calcium/phospholipid-binding;Referenceproteome;Repeat		GO:0006950;GO:0050896	GO:0005488;GO:0005509;GO:0005543;GO:0005544;GO:0008289;GO:0043167;GO:0043169;GO:0046872	GO:0005737;GO:0110165	GO:0006950;GO:0050896	GO:0005737;GO:0110165	9	8	2	34.7	31.5	6.4	35.731	0	76.544	11773000	41	2	A0A0R0H0L0;I1M0U7;C6TCN0	A0A0R0H0L0;I1M0U7	227	GLYMA_13G199500	KRH20772;KRH20773	KRH20772;KRH20773
18.5688	15.802	16.3784	18.0455	16.2042	17.2593	16.4143	16.6896	16.0839	16.9951	15.0693	16.2513				-1										Referenceproteome							1	1	1	3.6	3.6	3.6	28.627	0.00041754	2.4789	752610	16	7	A0A0R0H129;I1LPY7	A0A0R0H129;I1LPY7	228	GLYMA_12G038800	KRH24394;KRH24395;KRH24396	KRH24394;KRH24395;KRH24396
22.0841	22.3822	22.3233	22.5059	22.6437	22.6897	22.0906	21.1473	21.1495	21.1708	20.9004	22.0268				-1			binding;mRNA binding;nucleic acid binding;organic cyclic compound binding;RNA binding	cellular anatomical entity;cytosol;intracellular non-membrane-bounded organelle;intracellular organelle;nascent polypeptide-associated complex;non-membrane-bounded organelle;organelle;polysomal ribosome;protein-containing complex;ribosome		cellular anatomical entity;cytosol;intracellular non-membrane-bounded organelle;intracellular organelle;non-membrane-bounded organelle;organelle;protein-containing complex;ribosome		NAC		Referenceproteome;Transcription;Transcriptionregulation			GO:0003676;GO:0003723;GO:0003729;GO:0005488;GO:0097159	GO:0005829;GO:0005840;GO:0005854;GO:0032991;GO:0042788;GO:0043226;GO:0043228;GO:0043229;GO:0043232;GO:0110165		GO:0005829;GO:0005840;GO:0032991;GO:0043226;GO:0043228;GO:0043229;GO:0043232;GO:0110165	9	9	6	42.5	42.5	32.7	16.516	0	60.964	178960000	395	0	A0A1W7GJW2;C6T0Q0;A0A0R0H141;C6SX83;A0A0R4J4H3;C6SYT3	A0A1W7GJW2;C6T0Q0;A0A0R0H141;C6SX83;A0A0R4J4H3;C6SYT3	229	GLYMA_11G113900;GLYMA_11G114000;GLYMA_12G039900	KRH24412;KRH29393;KRH29394;KRH29395;KRH29396	KRH24412;KRH29393;KRH29394;KRH29395;KRH29396
17.8938	18.9003	18.8367	19.0918	19.0868	18.7582	19.0877	18.0597	18.0619	18.6216	18.7834	18.7208				-1		arabinose metabolic process;carbohydrate metabolic process;L-arabinose metabolic process;metabolic process;monosaccharide metabolic process;organic substance metabolic process;pentose metabolic process;primary metabolic process;small molecule metabolic process	alpha-L-arabinofuranosidase activity;catalytic activity;hydrolase activity;hydrolase activity, acting on glycosyl bonds;hydrolase activity, hydrolyzing O-glycosyl compounds		carbohydrate metabolic process;metabolic process;primary metabolic process;small molecule metabolic process			Glyco_hydro_127		Referenceproteome;Signal		GO:0005975;GO:0005996;GO:0008152;GO:0019321;GO:0019566;GO:0044238;GO:0044281;GO:0046373;GO:0071704	GO:0003824;GO:0004553;GO:0016787;GO:0016798;GO:0046556		GO:0005975;GO:0008152;GO:0044238;GO:0044281		5	5	5	7.5	7.5	7.5	96.951	0	21.833	9460700	41	0	A0A0R0H1W3;I1LJU3;A0A0R0HGV8;K7LPJ3;A0A0R0HQN9;A0A0R0HSM5;A0A0R0HPS3	A0A0R0H1W3;I1LJU3;A0A0R0HGV8;K7LPJ3	230	GLYMA_11G131700;GLYMA_12G055900	KRH24684;KRH29686;KRH29687;KRH29688	KRH24684;KRH29686;KRH29687;KRH29688
16.4241	19.0122	17.3702	18.7366	18.7888	18.7152	17.3753	15.5353	15.3888	18.1724	15.2963	18.2478				-1		amide biosynthetic process;amide metabolic process;biosynthetic process;cellular biosynthetic process;cellular component assembly;cellular component organization;cellular component organization or biogenesis;cellular metabolic process;cellular nitrogen compound biosynthetic process;cellular nitrogen compound metabolic process;cellular process;macromolecule biosynthetic process;macromolecule metab…	structural constituent of ribosome;structural molecule activity	cellular anatomical entity;cytosolic large ribosomal subunit;intracellular non-membrane-bounded organelle;intracellular organelle;large ribosomal subunit;non-membrane-bounded organelle;organelle;protein-containing complex;ribonucleoprotein complex;ribosomal subunit;ribosome	amide metabolic process;biosynthetic process;cellular component assembly;cellular component organization;cellular component organization or biogenesis;cellular nitrogen compound metabolic process;cellular process;macromolecule biosynthetic process;macromolecule metabolic process;metabolic process;nitrogen compound metabolic process;peptide metabolic process;primary metabolic process;protein metab…	cellular anatomical entity;intracellular non-membrane-bounded organelle;intracellular organelle;non-membrane-bounded organelle;organelle;protein-containing complex;ribonucleoprotein complex;ribosome		Ribosomal_L38e		Referenceproteome;Ribonucleoprotein;Ribosomalprotein		GO:0006412;GO:0006518;GO:0006807;GO:0008152;GO:0009058;GO:0009059;GO:0009987;GO:0016043;GO:0019538;GO:0022607;GO:0022618;GO:0034641;GO:0043043;GO:0043170;GO:0043603;GO:0043604;GO:0043933;GO:0044237;GO:0044238;GO:0044249;GO:0044271;GO:0065003;GO:0071704;GO:0071826;GO:0071840;GO:1901564;GO:1901566;GO:1901576	GO:0003735;GO:0005198	GO:0005840;GO:0015934;GO:0022625;GO:0032991;GO:0043226;GO:0043228;GO:0043229;GO:0043232;GO:0044391;GO:0110165;GO:1990904	GO:0006412;GO:0006518;GO:0006807;GO:0008152;GO:0009058;GO:0009059;GO:0009987;GO:0016043;GO:0019538;GO:0022607;GO:0022618;GO:0034641;GO:0043170;GO:0043603;GO:0044238;GO:0065003;GO:0071840	GO:0005840;GO:0032991;GO:0043226;GO:0043228;GO:0043229;GO:0043232;GO:0110165;GO:1990904	2	2	2	27.5	27.5	27.5	8.0765	0	15.242	2453500	3	6	C6SWA8;A0A0R0H271;C6T0S7;A0A0R0H8Q8	C6SWA8;A0A0R0H271;C6T0S7;A0A0R0H8Q8	232	GLYMA_05G143700;GLYMA_08G100000;GLYMA_13G221500;GLYMA_13G345600;GLYMA_15G028700;GLYMA_15G090800	KRH10105;KRH11128;KRH21115;KRH23227;KRH42601;KRH58706	KRH10105;KRH11128;KRH21115;KRH23227;KRH42601;KRH58706
22.1793	21.5065	21.9986	21.5946	22.146	21.6227	21.6348	22.2814	22.2836	22.0757	21.3558	21.8434				-1		aromatic compound biosynthetic process;biosynthetic process;cellular aromatic compound metabolic process;cellular biosynthetic process;cellular metabolic process;cellular nitrogen compound biosynthetic process;cellular nitrogen compound metabolic process;cellular process;chlorophyll biosynthetic process;chlorophyll metabolic process;heterocycle biosynthetic process;heterocycle metabolic process;m…	adenyl nucleotide binding;adenyl ribonucleotide binding;anion binding;ATP binding;ATP hydrolysis activity;binding;carbohydrate derivative binding;catalytic activity;heterocyclic compound binding;hydrolase activity;hydrolase activity, acting on acid anhydrides;hydrolase activity, acting on acid anhydrides, in phosphorus-containing anhydrides;ion binding;ligase activity;ligase activity, forming nit…	cellular anatomical entity;chloroplast;chloroplast stroma;intracellular membrane-bounded organelle;intracellular organelle;membrane-bounded organelle;organelle;plastid;plastid stroma	biosynthetic process;cellular aromatic compound metabolic process;cellular nitrogen compound metabolic process;cellular process;heterocycle metabolic process;metabolic process;nitrogen compound metabolic process;photosynthesis;pigment metabolic process;tetrapyrrole metabolic process	cellular anatomical entity;chloroplast;intracellular membrane-bounded organelle;intracellular organelle;organelle;plastid		AAA_lid_2;Mg_chelatase		ATP-binding;Chlorophyllbiosynthesis;Chloroplast;Disulfidebond;Ligase;Nucleotide-binding;Photosynthesis;Plastid;Referenceproteome;Transitpeptide		GO:0006725;GO:0006778;GO:0006779;GO:0006807;GO:0008152;GO:0009058;GO:0009987;GO:0015979;GO:0015994;GO:0015995;GO:0018130;GO:0019438;GO:0033013;GO:0033014;GO:0034641;GO:0042440;GO:0044237;GO:0044249;GO:0044271;GO:0046148;GO:0046483;GO:0071704;GO:1901360;GO:1901362;GO:1901564;GO:1901566;GO:1901576	GO:0000166;GO:0003824;GO:0005488;GO:0005524;GO:0016462;GO:0016787;GO:0016817;GO:0016818;GO:0016851;GO:0016874;GO:0016887;GO:0017076;GO:0017111;GO:0030554;GO:0032553;GO:0032555;GO:0032559;GO:0035639;GO:0036094;GO:0043167;GO:0043168;GO:0051002;GO:0051003;GO:0097159;GO:0097367;GO:1901265;GO:1901363	GO:0009507;GO:0009532;GO:0009536;GO:0009570;GO:0043226;GO:0043227;GO:0043229;GO:0043231;GO:0110165	GO:0006725;GO:0006807;GO:0008152;GO:0009058;GO:0009987;GO:0015979;GO:0033013;GO:0034641;GO:0042440;GO:0046483	GO:0009507;GO:0009536;GO:0043226;GO:0043229;GO:0043231;GO:0110165	9	9	9	26.6	26.6	26.6	45.871	0	36.469	160440000	137	0	P93162;I1MEQ1;A0A0R0H275;C6TKQ8;C6TBL0;I1KLS0;I1M038	P93162;I1MEQ1;A0A0R0H275;C6TKQ8;C6TBL0;I1KLS0;I1M038	233	GLYMA_07G204300;GLYMA_13G171800;GLYMA_13G232500;GLYMA_15G080200	KRH10981;KRH20341;KRH21317;KRH50153	KRH10981;KRH20341;KRH21317;KRH50153
18.4694	15.5465	18.672	16.8022	15.6276	18.2456	15.5631	18.5163	18.5186	19.0953	18.966	16.5694				-1		alpha-amino acid biosynthetic process;alpha-amino acid catabolic process;alpha-amino acid metabolic process;amide metabolic process;amino acid biosynthetic process;amino acid catabolic process;amino acid metabolic process;biosynthetic process;carboxylic acid biosynthetic process;carboxylic acid catabolic process;carboxylic acid metabolic process;catabolic process;cellular aromatic compound metabo…	amino acid binding;anion binding;binding;carboxylic acid binding;catalytic activity;cation binding;glycine hydroxymethyltransferase activity;heterocyclic compound binding;hydroxymethyl-, formyl- and related transferase activity;ion binding;metal ion binding;methyltransferase activity;organic acid binding;organic cyclic compound binding;pyridoxal phosphate binding;serine binding;small molecule bin…	cellular anatomical entity;cytoplasm	amide metabolic process;amino acid metabolic process;biosynthetic process;catabolic process;cellular aromatic compound metabolic process;cellular modified amino acid metabolic process;cellular process;heterocycle metabolic process;metabolic process;methylation;nitrogen compound metabolic process;one-carbon metabolic process;organic acid metabolic process;primary metabolic process;small molecule m…	cellular anatomical entity;cytoplasm		SHMT		Methyltransferase;One-carbonmetabolism;Pyridoxalphosphate;Referenceproteome;Transferase		GO:0006082;GO:0006520;GO:0006544;GO:0006545;GO:0006563;GO:0006565;GO:0006575;GO:0006725;GO:0006730;GO:0006760;GO:0006766;GO:0006767;GO:0006807;GO:0008152;GO:0008652;GO:0009056;GO:0009058;GO:0009063;GO:0009069;GO:0009070;GO:0009071;GO:0009987;GO:0016053;GO:0016054;GO:0019264;GO:0019752;GO:0032259;GO:0035999;GO:0042558;GO:0043436;GO:0043603;GO:0043648;GO:0044237;GO:0044238;GO:0044248;GO:0044249;GO:…	GO:0003824;GO:0004372;GO:0005488;GO:0008168;GO:0008270;GO:0016597;GO:0016740;GO:0016741;GO:0016742;GO:0019842;GO:0030170;GO:0031406;GO:0036094;GO:0043167;GO:0043168;GO:0043169;GO:0043177;GO:0046872;GO:0046914;GO:0070279;GO:0070905;GO:0097159;GO:1901363	GO:0005737;GO:0110165	GO:0006082;GO:0006520;GO:0006575;GO:0006725;GO:0006730;GO:0006766;GO:0006807;GO:0008152;GO:0009056;GO:0009058;GO:0009987;GO:0032259;GO:0043603;GO:0044238;GO:0044281;GO:0046483	GO:0005737;GO:0110165	3	3	3	6.1	6.1	6.1	57.378	0	9.8821	5211700	13	4	A0A0R0H289;C6ZJY9;A0A0R0FP82;I1M1L2;A0A0R0FY89	A0A0R0H289;C6ZJY9;A0A0R0FP82;I1M1L2	234	GLYMA_13G222300;GLYMA_16G108100	KRH07754;KRH21130;KRH21131;KRH21132;KRH21133	KRH07754;KRH21130;KRH21131;KRH21132;KRH21133
20.5095	18.9752	18.3254	18.2597	18.3296	18.6057	17.9323	19.3375	19.3397	20.0591	18.9355	18.6752				-1		amide biosynthetic process;amide metabolic process;biosynthetic process;cellular biosynthetic process;cellular metabolic process;cellular nitrogen compound biosynthetic process;cellular nitrogen compound metabolic process;cellular process;macromolecule biosynthetic process;macromolecule metabolic process;metabolic process;nitrogen compound metabolic process;organic substance biosynthetic process;…	structural constituent of ribosome;structural molecule activity	cellular anatomical entity;cytosolic small ribosomal subunit;intracellular non-membrane-bounded organelle;intracellular organelle;non-membrane-bounded organelle;organelle;protein-containing complex;ribonucleoprotein complex;ribosomal subunit;ribosome;small ribosomal subunit	amide metabolic process;biosynthetic process;cellular nitrogen compound metabolic process;cellular process;macromolecule biosynthetic process;macromolecule metabolic process;metabolic process;nitrogen compound metabolic process;peptide metabolic process;primary metabolic process;protein metabolic process;translation	cellular anatomical entity;intracellular non-membrane-bounded organelle;intracellular organelle;non-membrane-bounded organelle;organelle;protein-containing complex;ribonucleoprotein complex;ribosome;small ribosomal subunit		Ribosom_S12_S23		Referenceproteome;Ribonucleoprotein;Ribosomalprotein		GO:0006412;GO:0006518;GO:0006807;GO:0008152;GO:0009058;GO:0009059;GO:0009987;GO:0019538;GO:0034641;GO:0043043;GO:0043170;GO:0043603;GO:0043604;GO:0044237;GO:0044238;GO:0044249;GO:0044271;GO:0071704;GO:1901564;GO:1901566;GO:1901576	GO:0003735;GO:0005198	GO:0005840;GO:0015935;GO:0022627;GO:0032991;GO:0043226;GO:0043228;GO:0043229;GO:0043232;GO:0044391;GO:0110165;GO:1990904	GO:0006412;GO:0006518;GO:0006807;GO:0008152;GO:0009058;GO:0009059;GO:0009987;GO:0019538;GO:0034641;GO:0043170;GO:0043603;GO:0044238	GO:0005840;GO:0015935;GO:0032991;GO:0043226;GO:0043228;GO:0043229;GO:0043232;GO:0110165;GO:1990904	1	1	1	10.9	10.9	10.9	11.104	0	9.8139	7555700	19	0	I1JPJ4;I1NA60;A0A0R0H296;I1LZ10;I1LZ09;I1L8S1;C6TDD7;C6SZC2;C6SXT4	I1JPJ4;I1NA60;A0A0R0H296;I1LZ10;I1LZ09;I1L8S1;C6TDD7;C6SZC2;C6SXT4	235	GLYMA_03G178000;GLYMA_10G049400;GLYMA_12G072300;GLYMA_13G137100;GLYMA_19G178800	KRG95929;KRG95930;KRH19812;KRH19813;KRH24942;KRH32405;KRH67642;KRH67643	KRG95929;KRG95930;KRH19812;KRH19813;KRH24942;KRH32405;KRH67642;KRH67643
21.0878	19.924	19.791	19.387	19.2791	19.4907	19.7415	20.0678	20.07	20.6673	20.249	20.1482				-1								Epimerase		Referenceproteome							9	4	4	38.5	18.8	18.8	37.94	0	59.997	24562000	44	0	A0A0R0H2Q4;I1LTQ2;I1LRF1;I1LKS9	A0A0R0H2Q4	236	GLYMA_12G084100	KRH25153	KRH25153
20.5141	19.4779	19.2389	19.6032	19.4412	20.0461	19.075	20.3506	20.3527	17.394	19.7749	17.2163				-1		cellular metabolic process;cellular process;dephosphorylation;macromolecule metabolic process;macromolecule modification;metabolic process;nitrogen compound metabolic process;organic substance metabolic process;organonitrogen compound metabolic process;phosphate-containing compound metabolic process;phosphorus metabolic process;primary metabolic process;protein dephosphorylation;protein metabolic…	acid phosphatase activity;catalytic activity;catalytic activity, acting on a protein;hydrolase activity;hydrolase activity, acting on ester bonds;phosphatase activity;phosphoprotein phosphatase activity;phosphoric ester hydrolase activity;protein tyrosine phosphatase activity		cellular process;macromolecule metabolic process;macromolecule modification;metabolic process;nitrogen compound metabolic process;phosphorus metabolic process;primary metabolic process;protein dephosphorylation;protein metabolic process;protein modification process			LMWPc		Hydrolase;Referenceproteome		GO:0006470;GO:0006793;GO:0006796;GO:0006807;GO:0008152;GO:0009987;GO:0016311;GO:0019538;GO:0036211;GO:0043170;GO:0043412;GO:0044237;GO:0044238;GO:0071704;GO:1901564	GO:0003824;GO:0003993;GO:0004721;GO:0004725;GO:0016787;GO:0016788;GO:0016791;GO:0042578;GO:0140096		GO:0006470;GO:0006793;GO:0006807;GO:0008152;GO:0009987;GO:0019538;GO:0036211;GO:0043170;GO:0043412;GO:0044238		1	1	1	8.2	8.2	8.2	24.54	0.0078711	1.6577	10363000	6	2	A0A0R0HBQ9;A0A0R0H2T3;A0A0R0H9Y5	A0A0R0HBQ9;A0A0R0H2T3;A0A0R0H9Y5	237	GLYMA_12G086800	KRH25185;KRH25186;KRH25187	KRH25185;KRH25186;KRH25187
18.9856	15.3111	14.6218	16.1293	17.1037	18.0249	18.2898	18.3675	18.3697	17.7675	18.6286	17.9899				-1		cell cycle process;cellular component organization;cellular component organization or biogenesis;cellular process;chromosome condensation;chromosome organization;mitotic cell cycle process;mitotic chromosome condensation;organelle organization	binding;chromatin binding;protein-containing complex binding	cellular anatomical entity;chromatin;chromosome;condensed chromosome;condensin complex;intracellular non-membrane-bounded organelle;intracellular organelle;non-membrane-bounded organelle;organelle;protein-containing complex;protein-DNA complex	cellular component organization;cellular component organization or biogenesis;cellular process;chromosome organization;organelle organization	cellular anatomical entity;chromosome;condensin complex;intracellular non-membrane-bounded organelle;intracellular organelle;non-membrane-bounded organelle;organelle;protein-containing complex;protein-DNA complex				Coiledcoil;Referenceproteome		GO:0006996;GO:0007076;GO:0009987;GO:0016043;GO:0022402;GO:0030261;GO:0051276;GO:0071840;GO:1903047	GO:0003682;GO:0005488;GO:0044877	GO:0000785;GO:0000793;GO:0000796;GO:0005694;GO:0032991;GO:0032993;GO:0043226;GO:0043228;GO:0043229;GO:0043232;GO:0110165	GO:0006996;GO:0009987;GO:0016043;GO:0051276;GO:0071840	GO:0000796;GO:0005694;GO:0032991;GO:0032993;GO:0043226;GO:0043228;GO:0043229;GO:0043232;GO:0110165	5	5	5	11.3	11.3	11.3	82.689	0	50.906	4217300	11	4	A0A0R0H3J8;I1LRE3	A0A0R0H3J8;I1LRE3	238	GLYMA_12G087100	KRH25190;KRH25191	KRH25190;KRH25191
19.8752	19.5165	18.6286	19.4717	16.4039	16.1615	16.9745	18.7047	18.7062	19.1866	20.0506	15.1016				-1		cellular component assembly;cellular component organization;cellular component organization or biogenesis;cellular localization;cellular macromolecule localization;cellular process;establishment of localization;establishment of protein localization;establishment of protein localization to chloroplast;establishment of protein localization to membrane;establishment of protein localization to organe…			cellular component assembly;cellular component organization;cellular component organization or biogenesis;cellular localization;cellular process;establishment of localization;localization;macromolecule localization;membrane organization;protein localization;protein transport;protein-containing complex assembly;transmembrane transport;transport			ThylakoidFormat		Coiledcoil;Referenceproteome		GO:0006810;GO:0008104;GO:0009668;GO:0009987;GO:0010027;GO:0010207;GO:0015031;GO:0016043;GO:0017038;GO:0022607;GO:0033036;GO:0033365;GO:0043933;GO:0044743;GO:0045037;GO:0045038;GO:0045184;GO:0051179;GO:0051234;GO:0051641;GO:0051668;GO:0055085;GO:0061024;GO:0065003;GO:0070727;GO:0071702;GO:0071705;GO:0071806;GO:0071840;GO:0072594;GO:0072596;GO:0072598;GO:0072657;GO:0090150			GO:0006810;GO:0008104;GO:0009987;GO:0015031;GO:0016043;GO:0022607;GO:0033036;GO:0051179;GO:0051234;GO:0051641;GO:0055085;GO:0061024;GO:0065003;GO:0071840		3	1	1	18.7	5.7	5.7	26.057	0	4.3706	5574300	3	4	A0A0R0H4A5;A0A0R0HD90;I1LRW8	A0A0R0H4A5;A0A0R0HD90;I1LRW8	239	GLYMA_12G106600	KRH25480;KRH25481;KRH25482;KRH25483	KRH25480;KRH25481;KRH25482;KRH25483
19.6597	23.1555	21.4687	22.9943	20.881	14.6126	22.6322	19.8984	19.9003	15.1288	22.463	15.7602				-1										Referenceproteome							2	2	2	7	7	7	22.229	0.005	1.8321	44352000	50	1	A0A0R0H4E3	A0A0R0H4E3	240	GLYMA_13G215700	KRH21028	KRH21028
16.1147	15.9443	15.4277	15.6599	15.7552	15.6544	15.9001	16.488	15.1764	16.6086	16.0134	15.6416				-1		aromatic compound biosynthetic process;biosynthetic process;cellular aromatic compound metabolic process;cellular biosynthetic process;cellular metabolic process;cellular process;coumarin biosynthetic process;coumarin metabolic process;heterocycle biosynthetic process;heterocycle metabolic process;metabolic process;organic cyclic compound biosynthetic process;organic cyclic compound metabolic pro…	acyltransferase activity;acyltransferase activity, transferring groups other than amino-acyl groups;catalytic activity;N-acyltransferase activity;transferase activity		biosynthetic process;cellular aromatic compound metabolic process;cellular process;heterocycle metabolic process;metabolic process;secondary metabolic process			Transferase		Referenceproteome		GO:0006725;GO:0008152;GO:0009058;GO:0009698;GO:0009699;GO:0009804;GO:0009805;GO:0009987;GO:0018130;GO:0019438;GO:0019748;GO:0044237;GO:0044249;GO:0044550;GO:0046483;GO:0071704;GO:1901360;GO:1901362;GO:1901576	GO:0003824;GO:0016410;GO:0016740;GO:0016746;GO:0016747		GO:0006725;GO:0008152;GO:0009058;GO:0009987;GO:0019748;GO:0046483		1	1	1	3.3	3.3	3.3	50.41	0	5.4807	584050	4	2	A0A0R0H5A1	A0A0R0H5A1	241	GLYMA_13G232400	KRH21316	KRH21316
18.4565	18.706	18.5422	18.1671	18.4584	18.7324	18.4521	18.789	18.7912	17.9545	18.12	18.7289				-1		auxin metabolic process;biological regulation;cellular metabolic process;cellular process;hormone metabolic process;metabolic process;regulation of biological quality;regulation of hormone levels	catalytic activity;hydrolase activity;hydrolase activity, acting on carbon-nitrogen (but not peptide) bonds;IAA-Ala conjugate hydrolase activity;IAA-amino acid conjugate hydrolase activity		biological regulation;cellular process;hormone metabolic process;metabolic process;regulation of biological quality			M20_dimer;Peptidase_M20		Referenceproteome;Signal		GO:0008152;GO:0009850;GO:0009987;GO:0010817;GO:0042445;GO:0044237;GO:0065007;GO:0065008	GO:0003824;GO:0010178;GO:0010179;GO:0016787;GO:0016810		GO:0008152;GO:0009987;GO:0042445;GO:0065007;GO:0065008		2	2	1	13.6	13.6	9.3	34.984	0	7.4865	6008800	40	0	A0A0R0H5B2;I1M5E5;I1MCX3	A0A0R0H5B2;I1M5E5;I1MCX3	242	GLYMA_13G352400;GLYMA_15G022300	KRH09985;KRH23345;KRH23346	KRH09985;KRH23345;KRH23346
17.4569	17.6945	17.7405	17.6891	17.7245	17.9108	17.5057	18.6229	18.6251	15.8794	15.9357	17.9742				-1		base conversion or substitution editing;cellular aromatic compound metabolic process;cellular metabolic process;cellular nitrogen compound metabolic process;cellular process;chloroplast RNA modification;cytidine to uridine editing;heterocycle metabolic process;macromolecule metabolic process;macromolecule modification;metabolic process;mRNA metabolic process;mRNA processing;nitrogen compound meta…		cellular anatomical entity;chloroplast;intracellular membrane-bounded organelle;intracellular organelle;membrane-bounded organelle;organelle;plastid	cellular aromatic compound metabolic process;cellular nitrogen compound metabolic process;cellular process;heterocycle metabolic process;macromolecule metabolic process;macromolecule modification;metabolic process;mRNA metabolic process;mRNA processing;nitrogen compound metabolic process;nucleobase-containing compound metabolic process;primary metabolic process;RNA metabolic process;RNA modificat…	cellular anatomical entity;chloroplast;intracellular membrane-bounded organelle;intracellular organelle;organelle;plastid				mRNAprocessing;Referenceproteome		GO:0006139;GO:0006396;GO:0006397;GO:0006725;GO:0006807;GO:0008152;GO:0009451;GO:0009987;GO:0016070;GO:0016071;GO:0016553;GO:0016554;GO:0034641;GO:0043170;GO:0043412;GO:0044237;GO:0044238;GO:0046483;GO:0071704;GO:0090304;GO:1900865;GO:1901360		GO:0009507;GO:0009536;GO:0043226;GO:0043227;GO:0043229;GO:0043231;GO:0110165	GO:0006139;GO:0006396;GO:0006397;GO:0006725;GO:0006807;GO:0008152;GO:0009451;GO:0009987;GO:0016070;GO:0016071;GO:0034641;GO:0043170;GO:0043412;GO:0044238;GO:0046483	GO:0009507;GO:0009536;GO:0043226;GO:0043229;GO:0043231;GO:0110165	3	3	3	21.4	21.4	21.4	20.96	0	6.4885	4108500	47	0	A0A0R0H5H3;I1ME71;C6TLP0;C6T068;C6SVJ2	A0A0R0H5H3;I1ME71;C6TLP0;C6T068;C6SVJ2	243	GLYMA_13G249900;GLYMA_15G064300	KRH10700;KRH10701;KRH21628;KRH21629;KRH21630;KRH21631	KRH10700;KRH10701;KRH21628;KRH21629;KRH21630;KRH21631
16.7208	15.5444	14.5725	14.3373	14.2034	15.9928	16.263	15.9505	15.9527	15.6461	14.4788	14.8457				-1		biosynthetic process;cellular biosynthetic process;cellular ketone metabolic process;cellular lipid metabolic process;cellular metabolic process;cellular process;isoprenoid biosynthetic process;isoprenoid metabolic process;ketone biosynthetic process;lipid biosynthetic process;lipid metabolic process;metabolic process;organic substance biosynthetic process;organic substance metabolic process;plas…	catalytic activity;prenyltransferase activity;transferase activity;transferase activity, transferring alkyl or aryl (other than methyl) groups	cellular anatomical entity;chloroplast;intracellular membrane-bounded organelle;intracellular organelle;membrane-bounded organelle;organelle;plastid	biosynthetic process;cellular ketone metabolic process;cellular lipid metabolic process;cellular process;lipid metabolic process;metabolic process;primary metabolic process;small molecule metabolic process	cellular anatomical entity;chloroplast;intracellular membrane-bounded organelle;intracellular organelle;organelle;plastid		polyprenyl_synt		Magnesium;Referenceproteome;Transferase		GO:0006629;GO:0006720;GO:0008152;GO:0008299;GO:0008610;GO:0009058;GO:0009987;GO:0010236;GO:0042180;GO:0042181;GO:0044237;GO:0044238;GO:0044249;GO:0044255;GO:0044281;GO:0044283;GO:0071704;GO:1901576;GO:1901661;GO:1901663	GO:0003824;GO:0004659;GO:0016740;GO:0016765	GO:0009507;GO:0009536;GO:0043226;GO:0043227;GO:0043229;GO:0043231;GO:0110165	GO:0006629;GO:0008152;GO:0009058;GO:0009987;GO:0042180;GO:0044238;GO:0044255;GO:0044281	GO:0009507;GO:0009536;GO:0043226;GO:0043229;GO:0043231;GO:0110165	1	1	1	6.1	6.1	6.1	45.992	0	5.1358	349850	5	5	I1MIX6;A0A0R4J4Y7;A0A0R0H668	I1MIX6;A0A0R4J4Y7;A0A0R0H668	244	GLYMA_13G262200;GLYMA_15G243100	KRH13490;KRH21838;KRH21839	KRH13490;KRH21838;KRH21839
22.296	23.3391	23.4246	23.4149	23.58	23.3337	23.6422	22.8791	22.9092	22.5399	21.7658	23.2995				-1			anion binding;binding;carbohydrate derivative binding;catalytic activity;FMN binding;heterocyclic compound binding;ion binding;NAD(P)H dehydrogenase (quinone) activity;nucleoside phosphate binding;nucleotide binding;organic cyclic compound binding;oxidoreductase activity;oxidoreductase activity, acting on NAD(P)H;oxidoreductase activity, acting on NAD(P)H, quinone or similar compound as acceptor;…	cellular anatomical entity;membrane		cellular anatomical entity;membrane		FMN_red		Referenceproteome			GO:0000166;GO:0003824;GO:0003955;GO:0005488;GO:0010181;GO:0016491;GO:0016651;GO:0016655;GO:0032553;GO:0036094;GO:0043167;GO:0043168;GO:0097159;GO:0097367;GO:1901265;GO:1901363	GO:0016020;GO:0110165		GO:0016020;GO:0110165	7	7	1	52.6	52.6	7.8	20.421	0	94.466	238370000	308	0	A0A0R0H7E5;A0A0R4J532;C6SVU1;I1LT63;I1LSS9;A0A0R0JLU8	A0A0R0H7E5;A0A0R4J532;C6SVU1	246	GLYMA_13G284200	KRH22189;KRH22191	KRH22189;KRH22191
23.0625	23.4008	23.4169	23.4882	23.56	23.5586	23.4974	23.6747	23.6768	24.1135	23.8295	23.4624				-1		biological regulation;cellular process;regulation of biological process;regulation of cellular process;signal transduction		cellular anatomical entity;cytoplasm	biological regulation;cellular process;regulation of biological process;signal transduction	cellular anatomical entity;cytoplasm		2014-03-03		Referenceproteome		GO:0007165;GO:0009987;GO:0050789;GO:0050794;GO:0065007		GO:0005737;GO:0110165	GO:0007165;GO:0009987;GO:0050789;GO:0065007	GO:0005737;GO:0110165	12	10	4	49.2	42.7	21.9	29.389	0	24.335	247340000	100	0	I1M3M0;Q96453;A0A0R0H7R6;C6TH93	I1M3M0;Q96453;A0A0R0H7R6	248	GLYMA_13G290900	KRH22287;KRH22288	KRH22287;KRH22288
21.1016	19.7456	19.171	18.9068	18.9707	19.9287	17.0436	15.8731	16.0236	21.1083	20.9713	20.3297				-1		amide biosynthetic process;amide metabolic process;biosynthetic process;cellular biosynthetic process;cellular metabolic process;cellular nitrogen compound biosynthetic process;cellular nitrogen compound metabolic process;cellular process;macromolecule biosynthetic process;macromolecule metabolic process;metabolic process;nitrogen compound metabolic process;organic substance biosynthetic process;…	binding;nucleic acid binding;organic cyclic compound binding;RNA binding;structural constituent of ribosome;structural molecule activity	cellular anatomical entity;intracellular membrane-bounded organelle;intracellular non-membrane-bounded organelle;intracellular organelle;membrane-bounded organelle;mitochondrion;non-membrane-bounded organelle;organelle;protein-containing complex;ribonucleoprotein complex;ribosome	amide metabolic process;biosynthetic process;cellular nitrogen compound metabolic process;cellular process;macromolecule biosynthetic process;macromolecule metabolic process;metabolic process;nitrogen compound metabolic process;peptide metabolic process;primary metabolic process;protein metabolic process;translation	cellular anatomical entity;intracellular membrane-bounded organelle;intracellular non-membrane-bounded organelle;intracellular organelle;mitochondrion;non-membrane-bounded organelle;organelle;protein-containing complex;ribonucleoprotein complex;ribosome		KOW;ribosomal_L24		Referenceproteome;Ribonucleoprotein;Ribosomalprotein		GO:0006412;GO:0006518;GO:0006807;GO:0008152;GO:0009058;GO:0009059;GO:0009987;GO:0019538;GO:0034641;GO:0043043;GO:0043170;GO:0043603;GO:0043604;GO:0044237;GO:0044238;GO:0044249;GO:0044271;GO:0071704;GO:1901564;GO:1901566;GO:1901576	GO:0003676;GO:0003723;GO:0003735;GO:0005198;GO:0005488;GO:0097159	GO:0005739;GO:0005840;GO:0032991;GO:0043226;GO:0043227;GO:0043228;GO:0043229;GO:0043231;GO:0043232;GO:0110165;GO:1990904	GO:0006412;GO:0006518;GO:0006807;GO:0008152;GO:0009058;GO:0009059;GO:0009987;GO:0019538;GO:0034641;GO:0043170;GO:0043603;GO:0044238	GO:0005739;GO:0005840;GO:0032991;GO:0043226;GO:0043228;GO:0043229;GO:0043231;GO:0043232;GO:0110165;GO:1990904	3	3	3	20.4	20.4	20.4	16.836	0	7.8137	17169000	29	3	A0A0R0H8N9;C6SZB2;C6T0A2;A0A0R0HID3;A0A0R0EV19	A0A0R0H8N9;C6SZB2;C6T0A2;A0A0R0HID3	249	GLYMA_12G215900;GLYMA_13G285600	KRH22214;KRH27125;KRH27126	KRH22214;KRH27125;KRH27126
17.4964	17.4355	16.7946	16.6124	16.4806	16.947	16.894	17.1889	17.1911	16.8824	15.1795	17.0826				-1		anatomical structure development;carbon fixation;cellular metabolic process;cellular process;developmental process;leaf development;metabolic process;organic substance metabolic process;photosynthesis;phyllome development;plant organ development;primary metabolic process;tricarboxylic acid cycle	carbon-carbon lyase activity;carboxy-lyase activity;catalytic activity;lyase activity;phosphoenolpyruvate carboxykinase activity;phosphoenolpyruvate carboxylase activity	cellular anatomical entity;cytosol	anatomical structure development;cellular process;developmental process;metabolic process;photosynthesis;primary metabolic process	cellular anatomical entity;cytosol		PEPcase		Allostericenzyme;Carbondioxidefixation;Cytoplasm;Lyase;Magnesium;Phosphoprotein;Photosynthesis;Pyruvate;Referenceproteome		GO:0006099;GO:0008152;GO:0009987;GO:0015977;GO:0015979;GO:0032502;GO:0044237;GO:0044238;GO:0048366;GO:0048827;GO:0048856;GO:0071704;GO:0099402	GO:0003824;GO:0004611;GO:0008964;GO:0016829;GO:0016830;GO:0016831	GO:0005829;GO:0110165	GO:0008152;GO:0009987;GO:0015979;GO:0032502;GO:0044238;GO:0048856	GO:0005829;GO:0110165	12	1	0	15.2	1.2	0	110.74	0	12.3	2334600	38	0	Q8H929;P51061;A0A0R0H967;Q8H928;O22117	Q8H929;P51061;A0A0R0H967;Q8H928;O22117	250	GLYMA_12G229400;GLYMA_13G270400	KRH21974;KRH21975;KRH21976;KRH21977;KRH21978;KRH27344;KRH27345;KRH27346	KRH21974;KRH21975;KRH21976;KRH21977;KRH21978;KRH27344;KRH27345;KRH27346
23.6694	22.7733	22.9798	22.471	22.6417	23.0735	22.6135	22.8788	22.881	22.9351	23.4211	23.0692				-1		cellular metabolic process;cellular process;metabolic process;photosynthesis	binding;catalytic activity;cation binding;electron transfer activity;heme binding;ion binding;iron ion binding;metal ion binding;organic cyclic compound binding;oxidoreductase activity;tetrapyrrole binding;transition metal ion binding	bounding membrane of organelle;cellular anatomical entity;chloroplast thylakoid membrane;membrane;organelle membrane;organelle outer membrane;outer membrane;photosynthetic membrane;plastid membrane;plastid thylakoid membrane;thylakoid membrane	cellular process;metabolic process;photosynthesis	cellular anatomical entity;membrane;outer membrane		Apocytochr_F_C;Apocytochr_F_N		Chloroplast;Electrontransport;Heme;Iron;Membrane;Metal-binding;Photosynthesis;Plastid;Referenceproteome;Signal;Thylakoid;Transmembrane;Transmembranehelix;Transport		GO:0008152;GO:0009987;GO:0015979;GO:0044237	GO:0003824;GO:0005488;GO:0005506;GO:0009055;GO:0016491;GO:0020037;GO:0043167;GO:0043169;GO:0046872;GO:0046906;GO:0046914;GO:0097159	GO:0009535;GO:0016020;GO:0019867;GO:0031090;GO:0031968;GO:0034357;GO:0042170;GO:0042651;GO:0055035;GO:0098588;GO:0110165	GO:0008152;GO:0009987;GO:0015979	GO:0016020;GO:0019867;GO:0110165	15	15	15	55.6	55.6	55.6	35.322	0	170.43	627190000	586	0	A0A0R0H975;P49161;C6TD21	A0A0R0H975;P49161	251	GLYMA_12G232900	KRH27390	KRH27390
22.9324	23.7149	23.7915	23.9429	24.0176	23.5134	23.9943	23.2442	23.2465	23.5622	23.5485	23.4585				-1		cellular process;macromolecule metabolic process;macromolecule modification;metabolic process;nitrogen compound metabolic process;organic substance metabolic process;organonitrogen compound metabolic process;peptidyl-amino acid modification;peptidyl-proline modification;primary metabolic process;protein folding;protein metabolic process;protein modification process;protein peptidyl-prolyl isomeri…	amide binding;binding;catalytic activity;catalytic activity, acting on a protein;cis-trans isomerase activity;cyclosporin A binding;isomerase activity;peptide binding;peptidyl-prolyl cis-trans isomerase activity	cellular anatomical entity;cytoplasm	cellular process;macromolecule metabolic process;macromolecule modification;metabolic process;nitrogen compound metabolic process;peptidyl-amino acid modification;primary metabolic process;protein folding;protein metabolic process;protein modification process	cellular anatomical entity;cytoplasm		Pro_isomerase		Isomerase;Referenceproteome;Rotamase		GO:0000413;GO:0006457;GO:0006807;GO:0008152;GO:0009987;GO:0018193;GO:0018208;GO:0019538;GO:0036211;GO:0043170;GO:0043412;GO:0044238;GO:0071704;GO:1901564	GO:0003755;GO:0003824;GO:0005488;GO:0016018;GO:0016853;GO:0016859;GO:0033218;GO:0042277;GO:0140096	GO:0005737;GO:0110165	GO:0006457;GO:0006807;GO:0008152;GO:0009987;GO:0018193;GO:0019538;GO:0036211;GO:0043170;GO:0043412;GO:0044238	GO:0005737;GO:0110165	9	4	4	53.5	35.5	35.5	18.126	0	71.537	372060000	165	0	A0A0R0H9T5	A0A0R0H9T5	252	GLYMA_12G024700	KRH24153	KRH24153
19.0561	19.305	19.1138	19.0761	18.6833	19.0904	19.6294	17.5678	18.5546	18.8934	17.8858	18.6118				-1		aldehyde catabolic process;catabolic process;cellular aldehyde metabolic process;cellular catabolic process;cellular detoxification;cellular detoxification of aldehyde;cellular metabolic process;cellular process;detoxification;formaldehyde catabolic process;formaldehyde metabolic process;metabolic process;organic substance catabolic process;organic substance metabolic process;small molecule catab…	alcohol dehydrogenase (NAD+) activity;alcohol dehydrogenase [NAD(P)+] activity;alcohol dehydrogenase activity, zinc-dependent;binding;catalytic activity;cation binding;ion binding;metal ion binding;oxidoreductase activity;oxidoreductase activity, acting on CH-OH group of donors;oxidoreductase activity, acting on the CH-OH group of donors, NAD or NADP as acceptor;S-(hydroxymethyl)glutathione dehyd…	cellular anatomical entity;cytosol	catabolic process;cellular aldehyde metabolic process;cellular process;detoxification;metabolic process;small molecule metabolic process	cellular anatomical entity;cytosol		ADH_N;ADH_zinc_N		Metal-binding;Oxidoreductase;Referenceproteome;Zinc		GO:0006081;GO:0008152;GO:0009056;GO:0009987;GO:0044237;GO:0044248;GO:0044281;GO:0044282;GO:0046185;GO:0046292;GO:0046294;GO:0071704;GO:0098754;GO:0110095;GO:1901575;GO:1990748	GO:0003824;GO:0004022;GO:0004024;GO:0005488;GO:0008270;GO:0016491;GO:0016614;GO:0016616;GO:0018455;GO:0043167;GO:0043169;GO:0046872;GO:0046914;GO:0051903	GO:0005829;GO:0110165	GO:0006081;GO:0008152;GO:0009056;GO:0009987;GO:0044281;GO:0098754	GO:0005829;GO:0110165	3	3	3	16.3	16.3	16.3	39.304	0	5.0448	8483500	52	0	I1LP45;A0A0R0HA20;C6T0Y6;I1LP46;I1LP44;A0A0R0HDE0;C6T0Y5;A0A0R0H054	I1LP45;A0A0R0HA20;C6T0Y6;I1LP46;I1LP44	253	GLYMA_12G015100;GLYMA_12G015400	KRH23989;KRH23990;KRH23991;KRH23992;KRH23993;KRH23996	KRH23989;KRH23990;KRH23991;KRH23992;KRH23993;KRH23996
18.7044	19.1969	19.5821	19.6319	20.6356	20.0394	19.9606	18.615	18.6173	20.1989	18.7606	19.5742				-1		carbohydrate metabolic process;metabolic process;organic substance metabolic process;primary metabolic process	beta-glucosidase activity;catalytic activity;glucosidase activity;hydrolase activity;hydrolase activity, acting on glycosyl bonds;hydrolase activity, hydrolyzing O-glycosyl compounds		carbohydrate metabolic process;metabolic process;primary metabolic process			Glyco_hydro_1		Referenceproteome;Signal		GO:0005975;GO:0008152;GO:0044238;GO:0071704	GO:0003824;GO:0004553;GO:0008422;GO:0015926;GO:0016787;GO:0016798		GO:0005975;GO:0008152;GO:0044238		6	5	5	19.6	18	18	50.454	0	7.9887	16477000	25	0	A0A0R0HAJ8;A0A0R0GXV3	A0A0R0HAJ8;A0A0R0GXV3	254	GLYMA_13G343000	KRH23182;KRH23183	KRH23182;KRH23183
18.9442	18.6768	18.7627	18.5567	18.635	18.9802	16.3933	15.9862	18.9293	18.626	18.1761	18.2973				-1		aerobic electron transport chain;aerobic respiration;cellular metabolic process;cellular process;cellular respiration;electron transport chain;energy derivation by oxidation of organic compounds;generation of precursor metabolites and energy;metabolic process;mitochondrial electron transport, NADH to ubiquinone;respiratory electron transport chain	2 iron, 2 sulfur cluster binding;binding;catalytic activity;cation binding;ion binding;iron-sulfur cluster binding;metal cluster binding;metal ion binding;oxidoreductase activity	catalytic complex;inner mitochondrial membrane protein complex;membrane protein complex;mitochondrial protein-containing complex;mitochondrial respiratory chain complex I;NADH dehydrogenase complex;oxidoreductase complex;protein-containing complex;respiratory chain complex;respiratory chain complex I;transmembrane transporter complex;transporter complex	cellular process;cellular respiration;electron transport chain;generation of precursor metabolites and energy;metabolic process	catalytic complex;membrane protein complex;NADH dehydrogenase complex;oxidoreductase complex;protein-containing complex		2Fe-2S_thioredx		2Fe-2S;Iron;Iron-sulfur;Metal-binding;Referenceproteome;Signal		GO:0006091;GO:0006120;GO:0008152;GO:0009060;GO:0009987;GO:0015980;GO:0019646;GO:0022900;GO:0022904;GO:0044237;GO:0045333	GO:0003824;GO:0005488;GO:0016491;GO:0043167;GO:0043169;GO:0046872;GO:0051536;GO:0051537;GO:0051540	GO:0005747;GO:0030964;GO:0032991;GO:0045271;GO:0098796;GO:0098798;GO:0098800;GO:0098803;GO:1902494;GO:1902495;GO:1990204;GO:1990351	GO:0006091;GO:0008152;GO:0009987;GO:0022900;GO:0045333	GO:0030964;GO:0032991;GO:0098796;GO:1902494;GO:1990204	3	3	3	23.1	23.1	23.1	25.193	0	3.1427	5051200	5	2	I1M5V9;C6TIE6;C6SY06;I1M5V6;A0A0R0HBQ2	I1M5V9;C6TIE6;C6SY06;I1M5V6;A0A0R0HBQ2	257	GLYMA_13G367000;GLYMA_15G006400	KRH09710;KRH23598;KRH23599;KRH23600	KRH09710;KRH23598;KRH23599;KRH23600
16.2897	15.4055	15.0103	15.0598	16.3628	16.3702	16.1619	16.0811	16.1627	18.4802	18.7594	18.9344				-1				cellular anatomical entity;membrane;plasma membrane		cellular anatomical entity;membrane;plasma membrane		Fasciclin		Membrane;Referenceproteome;Signal;Transmembrane;Transmembranehelix				GO:0005886;GO:0016020;GO:0110165		GO:0005886;GO:0016020;GO:0110165	4	4	4	19.9	19.9	19.9	30.745	0	52.699	3174700	5	9	C6TKW6;A0A0R0HBT7;K7LQH3;I1LL68;K7LTF6;I1LQY2;I1LQX9;I1LL77;K7LQH2;K7LL82	C6TKW6;A0A0R0HBT7;K7LQH3;I1LL68;K7LTF6;I1LQY2;I1LQX9;I1LL77;K7LQH2	258	GLYMA_11G147800;GLYMA_11G148400;GLYMA_11G148500;GLYMA_11G148700;GLYMA_12G068900;GLYMA_12G069700;GLYMA_12G070000;GLYMA_12G070200	KRH24888;KRH24897;KRH24900;KRH24904;KRH29941;KRH29950;KRH29951;KRH29953	KRH24888;KRH24897;KRH24900;KRH24904;KRH29941;KRH29950;KRH29951;KRH29953
17.2964	17.1146	16.6078	17.076	16.6573	17.1853	16.6908	16.5414	16.3365	16.72	16.7792	17.0028				-1		cellular localization;cellular macromolecule localization;cellular process;establishment of localization;establishment of protein localization;localization;macromolecule localization;nitrogen compound transport;organic substance transport;protein localization;protein transport;transport	anion binding;binding;carbohydrate derivative binding;catalytic activity;GTP binding;GTPase activity;guanyl nucleotide binding;guanyl ribonucleotide binding;heterocyclic compound binding;hydrolase activity;hydrolase activity, acting on acid anhydrides;hydrolase activity, acting on acid anhydrides, in phosphorus-containing anhydrides;ion binding;nucleoside phosphate binding;nucleotide binding;orga…		cellular localization;cellular process;establishment of localization;localization;macromolecule localization;protein localization;protein transport;transport			Arf		GTP-binding;Nucleotide-binding;Referenceproteome		GO:0006810;GO:0008104;GO:0009987;GO:0015031;GO:0033036;GO:0045184;GO:0051179;GO:0051234;GO:0051641;GO:0070727;GO:0071702;GO:0071705	GO:0000166;GO:0003824;GO:0003924;GO:0005488;GO:0005525;GO:0016462;GO:0016787;GO:0016817;GO:0016818;GO:0017076;GO:0017111;GO:0019001;GO:0032553;GO:0032555;GO:0032561;GO:0035639;GO:0036094;GO:0043167;GO:0043168;GO:0097159;GO:0097367;GO:1901265;GO:1901363		GO:0006810;GO:0008104;GO:0009987;GO:0015031;GO:0033036;GO:0051179;GO:0051234;GO:0051641		1	1	1	8.5	8.5	8.5	18.12	0	21.614	1278600	18	1	I1K2E5;I1J9F2;I1K2E4;C6TG08;C6T2M2;C6T055;C6SWP6;A0A0R0HC62	I1K2E5;I1J9F2;I1K2E4;C6TG08;C6T2M2;C6T055;C6SWP6;A0A0R0HC62	259	GLYMA_01G194500;GLYMA_05G105800;GLYMA_11G047400	KRH28350;KRH58117;KRH58118;KRH77133;KRH77135;KRH77136;KRH77137	KRH28350;KRH58117;KRH58118;KRH77133;KRH77135;KRH77136;KRH77137
20.4509	20.2067	20.2822	20.5267	19.9647	19.8021	20.5801	19.4779	19.4801	20.7069	20.7094	19.8183				-1		ADP catabolic process;ADP metabolic process;aromatic compound catabolic process;ATP metabolic process;carbohydrate catabolic process;carbohydrate derivative catabolic process;carbohydrate derivative metabolic process;carbohydrate metabolic process;carboxylic acid metabolic process;catabolic process;cellular aromatic compound metabolic process;cellular catabolic process;cellular metabolic process;…	aldehyde-lyase activity;carbon-carbon lyase activity;catalytic activity;fructose-bisphosphate aldolase activity;lyase activity	cellular anatomical entity;cytosol	carbohydrate derivative metabolic process;carbohydrate metabolic process;catabolic process;cellular aromatic compound metabolic process;cellular nitrogen compound metabolic process;cellular process;generation of precursor metabolites and energy;heterocycle metabolic process;metabolic process;monocarboxylic acid metabolic process;nitrogen compound metabolic process;nucleobase-containing compound c…	cellular anatomical entity;cytosol		Glycolytic		Glycolysis;Lyase;Referenceproteome;Schiffbase		GO:0005975;GO:0006082;GO:0006090;GO:0006091;GO:0006096;GO:0006139;GO:0006163;GO:0006195;GO:0006725;GO:0006753;GO:0006793;GO:0006796;GO:0006807;GO:0008152;GO:0009056;GO:0009117;GO:0009132;GO:0009134;GO:0009135;GO:0009137;GO:0009141;GO:0009144;GO:0009150;GO:0009154;GO:0009166;GO:0009179;GO:0009181;GO:0009185;GO:0009191;GO:0009199;GO:0009205;GO:0009259;GO:0009261;GO:0009987;GO:0016052;GO:0019362;GO:…	GO:0003824;GO:0004332;GO:0016829;GO:0016830;GO:0016832	GO:0005829;GO:0110165	GO:0005975;GO:0006082;GO:0006090;GO:0006091;GO:0006139;GO:0006725;GO:0006793;GO:0006807;GO:0008152;GO:0009056;GO:0009117;GO:0009987;GO:0032787;GO:0034641;GO:0034655;GO:0044238;GO:0044281;GO:0046483;GO:0055086;GO:1901135	GO:0005829;GO:0110165	6	5	5	14.8	12.7	12.7	41.491	0	31.264	17823000	36	0	A0A0R0HCG5;I1NFR3;C6TIW0;I1LEQ8;I1LEQ9	A0A0R0HCG5;I1NFR3;C6TIW0;I1LEQ8	260	GLYMA_10G268500;GLYMA_12G153000;GLYMA_20G122500	KRG90928;KRH26114;KRH35847	KRG90928;KRH26114;KRH35847
21.5547	22.1483	22.3673	22.3598	22.1896	22.0058	22.3409	22.1351	22.1374	21.9517	21.8822	22.09				-1		cellular process;cellular response to stimulus;cellular response to stress;protein folding;response to endoplasmic reticulum stress;response to stimulus;response to stress	catalytic activity;catalytic activity, acting on a protein;intramolecular oxidoreductase activity;intramolecular oxidoreductase activity, transposing S-S bonds;isomerase activity;protein disulfide isomerase activity	cellular anatomical entity;endoplasmic reticulum;endoplasmic reticulum lumen;intracellular membrane-bounded organelle;intracellular organelle;intracellular organelle lumen;membrane;membrane-bounded organelle;membrane-enclosed lumen;organelle;organelle lumen	cellular process;protein folding;response to stimulus;response to stress	cellular anatomical entity;endoplasmic reticulum;intracellular membrane-bounded organelle;intracellular organelle;membrane;organelle;organelle lumen		Thioredoxin;Thioredoxin_6		Disulfidebond;Endoplasmicreticulum;Isomerase;Membrane;Redox-activecenter;Referenceproteome;Repeat;Signal;Transmembrane;Transmembranehelix		GO:0006457;GO:0006950;GO:0009987;GO:0033554;GO:0034976;GO:0050896;GO:0051716	GO:0003756;GO:0003824;GO:0016853;GO:0016860;GO:0016864;GO:0140096	GO:0005783;GO:0005788;GO:0016020;GO:0031974;GO:0043226;GO:0043227;GO:0043229;GO:0043231;GO:0043233;GO:0070013;GO:0110165	GO:0006457;GO:0006950;GO:0009987;GO:0050896	GO:0005783;GO:0016020;GO:0043226;GO:0043229;GO:0043231;GO:0043233;GO:0110165	17	17	4	33	33	7.4	61.611	0	79.085	161530000	299	0	B1Q2X5;A0A0R0HDA3	B1Q2X5;A0A0R0HDA3	261	GLYMA_12G172800	KRH26418	KRH26418
16.463	17.8768	16.9721	17.6679	16.3462	16.4086	17.7165	18.9529	18.9551	19.2162	15.6294	18.1698				-1		alpha-amino acid biosynthetic process;alpha-amino acid metabolic process;amino acid biosynthetic process;amino acid metabolic process;biosynthetic process;branched-chain amino acid biosynthetic process;branched-chain amino acid metabolic process;carboxylic acid biosynthetic process;carboxylic acid metabolic process;cellular biosynthetic process;cellular metabolic process;cellular process;leucine …	3-isopropylmalate dehydrogenase activity;adenyl nucleotide binding;binding;catalytic activity;cation binding;heterocyclic compound binding;ion binding;magnesium ion binding;metal ion binding;NAD binding;nucleoside phosphate binding;nucleotide binding;organic cyclic compound binding;oxidoreductase activity;oxidoreductase activity, acting on CH-OH group of donors;oxidoreductase activity, acting on …		amino acid metabolic process;biosynthetic process;cellular process;metabolic process;nitrogen compound metabolic process;organic acid metabolic process;primary metabolic process;small molecule metabolic process			Iso_dh		Amino-acidbiosynthesis;Branched-chainaminoacidbiosynthesis;Leucinebiosynthesis;Magnesium;Metal-binding;NAD;Oxidoreductase;Referenceproteome		GO:0006082;GO:0006520;GO:0006551;GO:0006807;GO:0008152;GO:0008652;GO:0009058;GO:0009081;GO:0009082;GO:0009098;GO:0009987;GO:0016053;GO:0019752;GO:0043436;GO:0044237;GO:0044238;GO:0044249;GO:0044281;GO:0044283;GO:0046394;GO:0071704;GO:1901564;GO:1901566;GO:1901576;GO:1901605;GO:1901607	GO:0000166;GO:0000287;GO:0003824;GO:0003862;GO:0005488;GO:0016491;GO:0016614;GO:0016616;GO:0017076;GO:0030554;GO:0036094;GO:0043167;GO:0043169;GO:0046872;GO:0051287;GO:0097159;GO:1901265;GO:1901363		GO:0006082;GO:0006520;GO:0006807;GO:0008152;GO:0009058;GO:0009987;GO:0044238;GO:0044281		8	1	1	29.5	3.5	3.5	39.954	0.0081876	1.6157	2983000	5	5	A0A0R0HDX9;I1M5X1;I1LI32;C6TGV1;A0A0R0HE89;C6TKN3	A0A0R0HDX9;I1M5X1;I1LI32;C6TGV1;A0A0R0HE89;C6TKN3	262	GLYMA_11G079000;GLYMA_13G367900	KRH23613;KRH28822;KRH28823;KRH28824	KRH23613;KRH28822;KRH28823;KRH28824
19.5516	19.7526	19.6812	19.5643	19.4889	19.7831	19.9787	19.7996	19.8018	20.7515	20.4261	19.9809				-1		amide biosynthetic process;amide metabolic process;amino acid metabolic process;biosynthetic process;biotin biosynthetic process;biotin metabolic process;carboxylic acid biosynthetic process;carboxylic acid metabolic process;cellular biosynthetic process;cellular metabolic process;cellular nitrogen compound biosynthetic process;cellular nitrogen compound metabolic process;cellular process;gamma-a…	4-aminobutyrate transaminase activity;adenosylmethionine-8-amino-7-oxononanoate transaminase activity;anion binding;binding;catalytic activity;heterocyclic compound binding;ion binding;organic cyclic compound binding;pyridoxal phosphate binding;small molecule binding;transaminase activity;transferase activity;transferase activity, transferring nitrogenous groups;vitamin B6 binding;vitamin binding		amide metabolic process;amino acid metabolic process;biosynthetic process;cellular nitrogen compound metabolic process;cellular process;heterocycle metabolic process;metabolic process;monocarboxylic acid metabolic process;nitrogen compound metabolic process;organic acid metabolic process;primary metabolic process;small molecule metabolic process;sulfur compound metabolic process;vitamin metabolic…			Aminotran_3		Pyridoxalphosphate;Referenceproteome		GO:0006082;GO:0006520;GO:0006766;GO:0006767;GO:0006768;GO:0006790;GO:0006807;GO:0008152;GO:0009058;GO:0009102;GO:0009110;GO:0009448;GO:0009987;GO:0016053;GO:0018130;GO:0019752;GO:0032787;GO:0034641;GO:0042364;GO:0043436;GO:0043603;GO:0043604;GO:0044237;GO:0044238;GO:0044249;GO:0044271;GO:0044272;GO:0044281;GO:0044283;GO:0046394;GO:0046483;GO:0071704;GO:0072330;GO:1901360;GO:1901362;GO:1901564;GO:…	GO:0003824;GO:0003867;GO:0004015;GO:0005488;GO:0008483;GO:0016740;GO:0016769;GO:0019842;GO:0030170;GO:0036094;GO:0043167;GO:0043168;GO:0070279;GO:0097159;GO:1901363		GO:0006082;GO:0006520;GO:0006766;GO:0006790;GO:0006807;GO:0008152;GO:0009058;GO:0009987;GO:0032787;GO:0034641;GO:0043603;GO:0044238;GO:0044281;GO:0046483		4	4	4	11.9	11.9	11.9	56.308	0	21.618	24722000	51	0	I1LIN0;A0A0R0HEI5;A0A0R0HCZ0;A0A0R0H0I8;I1LPE4	I1LIN0;A0A0R0HEI5	263	GLYMA_11G096200	KRH29085;KRH29086	KRH29085;KRH29086
22.0586	22.785	23.0389	22.9755	22.7039	22.7066	23.3449	22.5263	22.5285	22.6563	22.1785	22.6638				-1		cellular process;macromolecule metabolic process;macromolecule modification;metabolic process;nitrogen compound metabolic process;organic substance metabolic process;organonitrogen compound metabolic process;peptidyl-amino acid modification;peptidyl-proline modification;primary metabolic process;protein folding;protein metabolic process;protein modification process;protein peptidyl-prolyl isomeri…	amide binding;binding;catalytic activity;catalytic activity, acting on a protein;cis-trans isomerase activity;cyclosporin A binding;isomerase activity;peptide binding;peptidyl-prolyl cis-trans isomerase activity	cellular anatomical entity;cytoplasm	cellular process;macromolecule metabolic process;macromolecule modification;metabolic process;nitrogen compound metabolic process;peptidyl-amino acid modification;primary metabolic process;protein folding;protein metabolic process;protein modification process	cellular anatomical entity;cytoplasm		Pro_isomerase		Chaperone;Cytoplasm;Isomerase;Referenceproteome;Rotamase		GO:0000413;GO:0006457;GO:0006807;GO:0008152;GO:0009987;GO:0018193;GO:0018208;GO:0019538;GO:0036211;GO:0043170;GO:0043412;GO:0044238;GO:0071704;GO:1901564	GO:0003755;GO:0003824;GO:0005488;GO:0016018;GO:0016853;GO:0016859;GO:0033218;GO:0042277;GO:0140096	GO:0005737;GO:0110165	GO:0006457;GO:0006807;GO:0008152;GO:0009987;GO:0018193;GO:0019538;GO:0036211;GO:0043170;GO:0043412;GO:0044238	GO:0005737;GO:0110165	10	9	5	65.7	61.6	47.7	18.225	0	53.359	283010000	201	0	A0A0R0HEL8;Q8W171;A0A7T0IH72;P86548	A0A0R0HEL8;Q8W171	264	GLYMA_11G098700	KRH29120	KRH29120
24.0414	23.612	22.6992	23.0753	23.4751	23.5906	22.4698	21.3075	21.3097	23.7022	23.4535	23.4183				-1			binding;DNA binding;nucleic acid binding;organic cyclic compound binding;protein binding;protein dimerization activity;protein heterodimerization activity;structural constituent of chromatin;structural molecule activity	cellular anatomical entity;intracellular membrane-bounded organelle;intracellular organelle;membrane-bounded organelle;nucleosome;nucleus;organelle;protein-containing complex;protein-DNA complex		cellular anatomical entity;intracellular membrane-bounded organelle;intracellular organelle;nucleosome;nucleus;organelle;protein-containing complex;protein-DNA complex		Histone		Chromosome;DNA-binding;Nucleosomecore;Nucleus;Referenceproteome			GO:0003676;GO:0003677;GO:0005198;GO:0005488;GO:0005515;GO:0030527;GO:0046982;GO:0046983;GO:0097159	GO:0000786;GO:0005634;GO:0032991;GO:0032993;GO:0043226;GO:0043227;GO:0043229;GO:0043231;GO:0110165		GO:0000786;GO:0005634;GO:0032991;GO:0032993;GO:0043226;GO:0043229;GO:0043231;GO:0110165	7	7	1	47.1	47.1	5.1	15.182	0	90.783	293930000	278	0	A0A0R4J661;C6SWE9;C6T1C4;A0A0R0KKD0;A0A0R0HPZ5;C6SWY5;I1LQT0;A0A0R0HEQ3;C6T571	A0A0R4J661;C6SWE9;C6T1C4;A0A0R0KKD0;A0A0R0HPZ5;C6SWY5;I1LQT0;A0A0R0HEQ3;C6T571	265	GLYMA_03G172500;GLYMA_10G198500;GLYMA_11G141600;GLYMA_11G141700;GLYMA_11G141800;GLYMA_11G142100;GLYMA_12G065100;GLYMA_12G065200;GLYMA_12G065400;GLYMA_19G173400;GLYMA_20G191600	KRG92106;KRG95819;KRH24830;KRH24831;KRH24833;KRH29831;KRH29832;KRH29833;KRH29836;KRH34681;KRH67549	KRG92106;KRG95819;KRH24830;KRH24831;KRH24833;KRH29831;KRH29832;KRH29833;KRH29836;KRH34681;KRH67549
19.5212	15.8006	19.521	16.551	19.5263	19.5833	17.9339	19.4489	19.4511	20.3894	20.3434	19.7926				-1		biological regulation;cellular process;regulation of biological process;regulation of cellular process;signal transduction		cellular anatomical entity;cytoplasm	biological regulation;cellular process;regulation of biological process;signal transduction	cellular anatomical entity;cytoplasm		2014-03-03		Referenceproteome		GO:0007165;GO:0009987;GO:0050789;GO:0050794;GO:0065007		GO:0005737;GO:0110165	GO:0007165;GO:0009987;GO:0050789;GO:0065007	GO:0005737;GO:0110165	9	1	1	35	7.7	7.7	29.332	0	3.5608	9276600	29	3	I1LUM3;A0A0R0HF31;C6TM63	I1LUM3;A0A0R0HF31;C6TM63	266	GLYMA_12G210400	KRH27041;KRH27042	KRH27041;KRH27042
20.1499	22.0137	22.1223	22.265	22.7714	21.7756	22.5054	20.7051	20.7073	20.75	20.2602	21.0782				-1			binding;nucleic acid binding;organic cyclic compound binding					CSD		Referenceproteome			GO:0003676;GO:0005488;GO:0097159				3	1	1	26.9	10.4	10.4	20.992	0	3.3016	36447000	33	0	A0A0R0HF66	A0A0R0HF66	267	GLYMA_11G105900	KRH29261	KRH29261
16.7612	16.6983	16.3361	16.214	15.8879	15.7168	16.0909	16.8352	16.1064	18.2542	16.6612	16.2432				-1			binding;nucleic acid binding;organic cyclic compound binding	cellular anatomical entity;intracellular membrane-bounded organelle;intracellular organelle;membrane-bounded organelle;nucleus;organelle		cellular anatomical entity;intracellular membrane-bounded organelle;intracellular organelle;nucleus;organelle		CPSF_A;MMS1_N		Nucleus;Referenceproteome			GO:0003676;GO:0005488;GO:0097159	GO:0005634;GO:0043226;GO:0043227;GO:0043229;GO:0043231;GO:0110165		GO:0005634;GO:0043226;GO:0043229;GO:0043231;GO:0110165	1	1	1	2	2	2	66.744	0.00042141	2.5659	901860	4	4	A0A0R0HF88	A0A0R0HF88	268	GLYMA_12G078400	KRH25071	KRH25071
24.5742	23.5077	23.4633	23.3939	24.1263	23.904	22.8499	23.5489	23.5511	24.4788	24.2787	23.882				-1		amide biosynthetic process;amide metabolic process;biosynthetic process;cellular biosynthetic process;cellular metabolic process;cellular nitrogen compound biosynthetic process;cellular nitrogen compound metabolic process;cellular process;macromolecule biosynthetic process;macromolecule metabolic process;metabolic process;nitrogen compound metabolic process;organic substance biosynthetic process;…	binding;nucleic acid binding;organic cyclic compound binding;RNA binding;structural constituent of ribosome;structural molecule activity	cellular anatomical entity;cytosolic large ribosomal subunit;intracellular non-membrane-bounded organelle;intracellular organelle;large ribosomal subunit;non-membrane-bounded organelle;organelle;protein-containing complex;ribonucleoprotein complex;ribosomal subunit;ribosome	amide metabolic process;biosynthetic process;cellular nitrogen compound metabolic process;cellular process;macromolecule biosynthetic process;macromolecule metabolic process;metabolic process;nitrogen compound metabolic process;peptide metabolic process;primary metabolic process;protein metabolic process;translation	cellular anatomical entity;intracellular non-membrane-bounded organelle;intracellular organelle;non-membrane-bounded organelle;organelle;protein-containing complex;ribonucleoprotein complex;ribosome		Ribosomal_L5;Ribosomal_L5_C		Referenceproteome;Ribonucleoprotein;Ribosomalprotein		GO:0006412;GO:0006518;GO:0006807;GO:0008152;GO:0009058;GO:0009059;GO:0009987;GO:0019538;GO:0034641;GO:0043043;GO:0043170;GO:0043603;GO:0043604;GO:0044237;GO:0044238;GO:0044249;GO:0044271;GO:0071704;GO:1901564;GO:1901566;GO:1901576	GO:0003676;GO:0003723;GO:0003735;GO:0005198;GO:0005488;GO:0097159	GO:0005840;GO:0015934;GO:0022625;GO:0032991;GO:0043226;GO:0043228;GO:0043229;GO:0043232;GO:0044391;GO:0110165;GO:1990904	GO:0006412;GO:0006518;GO:0006807;GO:0008152;GO:0009058;GO:0009059;GO:0009987;GO:0019538;GO:0034641;GO:0043170;GO:0043603;GO:0044238	GO:0005840;GO:0032991;GO:0043226;GO:0043228;GO:0043229;GO:0043232;GO:0110165;GO:1990904	5	5	5	31	31	31	19.627	0	46.889	289550000	105	0	I1JVL6;I1KFQ7;C6SXI7;C6SX72;A0A0R0HFE2;I1MIK9;A0A0R0JNM6;A0A0R0H4Q2;C6SX50;A0A0R0JNS2;I1MIL0;A0A0R0K7Y8	I1JVL6;I1KFQ7;C6SXI7;C6SX72;A0A0R0HFE2;I1MIK9;A0A0R0JNM6;A0A0R0H4Q2;C6SX50;A0A0R0JNS2;I1MIL0	269	GLYMA_04G111500;GLYMA_06G272500;GLYMA_06G274200;GLYMA_06G317400;GLYMA_06G323000;GLYMA_12G131600;GLYMA_12G131700;GLYMA_15G227600	KRH13276;KRH13277;KRH13278;KRH25819;KRH25820;KRH25821;KRH25822;KRH55687;KRH55704;KRH56320;KRH56321;KRH56322;KRH56423;KRH62493;KRH62494	KRH13276;KRH13277;KRH13278;KRH25819;KRH25820;KRH25821;KRH25822;KRH55687;KRH55704;KRH56320;KRH56321;KRH56322;KRH56423;KRH62493;KRH62494
15.3588	15.4361	15.1941	15.1874	14.9422	15.1514	15.4509	15.7296	15.6726	15.6283	15.3675	15.636				-1			catalytic activity;oxidoreductase activity					ADH_N;ADH_zinc_N;ADH_zinc_N_2		Referenceproteome			GO:0003824;GO:0016491				2	2	2	12.8	12.8	12.8	29.155	0	5.5435	794430	18	0	A0A0R0HFS2;I1LV40	A0A0R0HFS2;I1LV40	272	GLYMA_12G227400	KRH27297;KRH27298	KRH27297;KRH27298
20.8894	20.6477	20.6976	20.5244	20.8616	20.347	20.1092	20.0317	20.034	20.3421	20.6368	20.6491				-1			anion binding;binding;carbohydrate derivative binding;catalytic activity;GTP binding;GTPase activity;guanyl nucleotide binding;guanyl ribonucleotide binding;heterocyclic compound binding;hydrolase activity;hydrolase activity, acting on acid anhydrides;hydrolase activity, acting on acid anhydrides, in phosphorus-containing anhydrides;ion binding;nucleoside phosphate binding;nucleotide binding;orga…	bounding membrane of organelle;cellular anatomical entity;membrane;organelle membrane;vacuolar membrane		cellular anatomical entity;membrane		Ras		Membrane;Referenceproteome;Transmembrane;Transmembranehelix			GO:0000166;GO:0003824;GO:0003924;GO:0005488;GO:0005525;GO:0016462;GO:0016787;GO:0016817;GO:0016818;GO:0017076;GO:0017111;GO:0019001;GO:0032553;GO:0032555;GO:0032561;GO:0035639;GO:0036094;GO:0043167;GO:0043168;GO:0097159;GO:0097367;GO:1901265;GO:1901363	GO:0005774;GO:0016020;GO:0031090;GO:0098588;GO:0110165		GO:0016020;GO:0110165	8	8	5	45.9	45.9	29.7	20.843	0	42.437	51405000	69	0	A0A0R0HGA9;A0A0R0HFW6;A0A0R4J4D0;I1LJE6;C6SW04;I1LJE5;C6SWS6;A0A0R0J6R1;I1LDB3;K7MSQ6;A0A0R0K473	A0A0R0HGA9;A0A0R0HFW6;A0A0R4J4D0;I1LJE6;C6SW04;I1LJE5;C6SWS6;A0A0R0J6R1	273	GLYMA_07G004500;GLYMA_08G205300;GLYMA_11G118800;GLYMA_12G044100	KRH24485;KRH29476;KRH29477;KRH29478;KRH29479;KRH29480;KRH29481;KRH44355;KRH47027;KRH47028	KRH24485;KRH29476;KRH29477;KRH29478;KRH29479;KRH29480;KRH29481;KRH44355;KRH47027;KRH47028
20.3599	20.8069	20.8263	20.9616	20.8639	20.9395	21.1599	21.2546	21.2568	20.7572	20.6706	20.8236				-1		biosynthetic process;cellular biosynthetic process;cellular metabolic process;cellular nitrogen compound biosynthetic process;cellular nitrogen compound metabolic process;cellular process;flavin-containing compound biosynthetic process;flavin-containing compound metabolic process;heterocycle biosynthetic process;heterocycle metabolic process;metabolic process;nitrogen compound metabolic process;o…	catalytic activity;riboflavin synthase activity;transferase activity;transferase activity, transferring alkyl or aryl (other than methyl) groups		biosynthetic process;cellular nitrogen compound metabolic process;cellular process;heterocycle metabolic process;metabolic process;nitrogen compound metabolic process;small molecule metabolic process;vitamin metabolic process			Lum_binding		Referenceproteome;Repeat		GO:0006766;GO:0006767;GO:0006771;GO:0006807;GO:0008152;GO:0009058;GO:0009110;GO:0009231;GO:0009987;GO:0018130;GO:0034641;GO:0042364;GO:0042726;GO:0042727;GO:0044237;GO:0044249;GO:0044271;GO:0044281;GO:0044283;GO:0046483;GO:0071704;GO:1901360;GO:1901362;GO:1901564;GO:1901566;GO:1901576	GO:0003824;GO:0004746;GO:0016740;GO:0016765		GO:0006766;GO:0006807;GO:0008152;GO:0009058;GO:0009987;GO:0034641;GO:0044281;GO:0046483		4	4	4	19.3	19.3	19.3	29.386	0	33.539	52438000	41	0	A0A0R0HH51	A0A0R0HH51	274	GLYMA_12G112900	KRH25572	KRH25572
16.5563	15.1001	15.3543	15.8678	15.9577	15.8099	16.3249	17.1174	17.1196	18.491	18.2591	18.5378				-1			catalytic activity;hydrolase activity;hydrolase activity, acting on ester bonds;phosphatase activity;phosphoric ester hydrolase activity					His_Phos_1		Referenceproteome			GO:0003824;GO:0016787;GO:0016788;GO:0016791;GO:0042578				1	1	1	4.4	4.4	4.4	32.89	0	2.5808	1692900	5	7	A0A0R0HJ44;A0A0R0HJ47;A0A0R0HTL3;A0A0R0HJ83;I1LRD0;I1LKV5	A0A0R0HJ44;A0A0R0HJ47;A0A0R0HTL3;A0A0R0HJ83;I1LRD0;I1LKV5	276	GLYMA_11G188800;GLYMA_12G085900	KRH25174;KRH30505;KRH30506;KRH30507;KRH30508;KRH30509	KRH25174;KRH30505;KRH30506;KRH30507;KRH30508;KRH30509
20.1822	19.7196	20.1176	16.6616	20.0058	20.2483	19.9239	19.3992	19.4015	15.0519	19.3055	20.2336				-1		cellular component organization;cellular component organization or biogenesis;cellular localization;cellular macromolecule localization;cellular process;chloroplast organization;establishment of localization;establishment of protein localization;establishment of protein localization to chloroplast;establishment of protein localization to organelle;localization;macromolecule localization;nitrogen …		cellular anatomical entity;chloroplast inner membrane;chloroplast membrane;membrane;organelle inner membrane;organelle membrane;plastid inner membrane;plastid membrane	cellular component organization;cellular component organization or biogenesis;cellular localization;cellular process;establishment of localization;localization;macromolecule localization;organelle organization;plastid organization;protein localization;protein transport;transmembrane transport;transport	cellular anatomical entity;membrane		STI1		Referenceproteome;Repeat		GO:0006810;GO:0006996;GO:0008104;GO:0009657;GO:0009658;GO:0009987;GO:0015031;GO:0016043;GO:0033036;GO:0033365;GO:0045037;GO:0045184;GO:0051179;GO:0051234;GO:0051641;GO:0055085;GO:0070727;GO:0071702;GO:0071705;GO:0071806;GO:0071840;GO:0072594;GO:0072596;GO:0072598		GO:0009528;GO:0009706;GO:0016020;GO:0019866;GO:0031090;GO:0031969;GO:0042170;GO:0110165	GO:0006810;GO:0006996;GO:0008104;GO:0009657;GO:0009987;GO:0015031;GO:0016043;GO:0033036;GO:0051179;GO:0051234;GO:0051641;GO:0055085;GO:0071840	GO:0016020;GO:0110165	5	5	2	20.7	20.7	9.5	33.507	0	20.19	13056000	31	2	A0A0R0HJS2;K7LR89;K7LR88;A0A0R0HJQ9;I1LM14	A0A0R0HJS2;K7LR89;K7LR88;A0A0R0HJQ9;I1LM14	277	GLYMA_11G202700	KRH30716;KRH30717;KRH30718;KRH30719;KRH30720	KRH30716;KRH30717;KRH30718;KRH30719;KRH30720
18.684	17.8221	17.5916	17.3121	16.6921	17.9362	17.6186	17.6068	17.8498	18.5175	17.6687	17.3245				-1		ATP synthesis coupled electron transport;cellular metabolic process;cellular process;electron transport chain;generation of precursor metabolites and energy;metabolic process;respiratory electron transport chain	4 iron, 4 sulfur cluster binding;active transmembrane transporter activity;binding;catalytic activity;cation binding;electron transfer activity;ion binding;iron-sulfur cluster binding;metal cluster binding;metal ion binding;NAD(P)H dehydrogenase (quinone) activity;NADH dehydrogenase (quinone) activity;NADH dehydrogenase (ubiquinone) activity;NADH dehydrogenase activity;oxidoreductase activity;oxi…	cellular anatomical entity;membrane	cellular process;electron transport chain;generation of precursor metabolites and energy;metabolic process	cellular anatomical entity;membrane		Fer2_4;Molybdopterin;NADH_dhqG_C;NADH-G_4Fe-4S_3		4Fe-4S;Iron;Iron-sulfur;Metal-binding;Referenceproteome		GO:0006091;GO:0008152;GO:0009987;GO:0022900;GO:0022904;GO:0042773;GO:0044237	GO:0003824;GO:0003954;GO:0003955;GO:0005215;GO:0005488;GO:0008137;GO:0009055;GO:0015399;GO:0015453;GO:0016491;GO:0016651;GO:0016655;GO:0022804;GO:0022857;GO:0043167;GO:0043169;GO:0046872;GO:0050136;GO:0051536;GO:0051539;GO:0051540	GO:0016020;GO:0110165	GO:0006091;GO:0008152;GO:0009987;GO:0022900	GO:0016020;GO:0110165	1	1	1	4.5	4.5	4.5	57.83	0	6.2112	3701700	21	1	A0A0R0HKE3;I1LMA5	A0A0R0HKE3;I1LMA5	278	GLYMA_11G214800	KRH30921;KRH30922	KRH30921;KRH30922
20.6186	20.628	20.6712	20.8731	20.644	20.6153	20.7438	20.6749	20.6771	20.3954	20.1767	20.4324				-1		biological regulation;catabolic process;cellular process;hormone-mediated signaling pathway;jasmonic acid mediated signaling pathway;macromolecule catabolic process;macromolecule metabolic process;macromolecule modification;metabolic process;modification-dependent macromolecule catabolic process;modification-dependent protein catabolic process;nitrogen compound metabolic process;organic substance…	binding;cullin family protein binding;protein binding	cellular anatomical entity;cytoplasm;intracellular membrane-bounded organelle;intracellular organelle;membrane-bounded organelle;nucleus;organelle	biological regulation;catabolic process;cellular process;macromolecule catabolic process;macromolecule metabolic process;macromolecule modification;metabolic process;nitrogen compound metabolic process;primary metabolic process;protein catabolic process;protein metabolic process;protein modification by small protein conjugation or removal;protein modification process;proteolysis;proteolysis invol…	cellular anatomical entity;cytoplasm;intracellular membrane-bounded organelle;intracellular organelle;nucleus;organelle		Skp1;Skp1_POZ		Referenceproteome;Ublconjugationpathway		GO:0006508;GO:0006511;GO:0006807;GO:0007165;GO:0008152;GO:0009056;GO:0009057;GO:0009755;GO:0009867;GO:0009987;GO:0010498;GO:0016567;GO:0019538;GO:0019941;GO:0030163;GO:0031146;GO:0032446;GO:0036211;GO:0043161;GO:0043170;GO:0043412;GO:0043632;GO:0043687;GO:0044238;GO:0050789;GO:0050794;GO:0051603;GO:0065007;GO:0070647;GO:0071704;GO:1901564;GO:1901565;GO:1901575	GO:0005488;GO:0005515;GO:0097602	GO:0005634;GO:0005737;GO:0043226;GO:0043227;GO:0043229;GO:0043231;GO:0110165	GO:0006508;GO:0006807;GO:0007165;GO:0008152;GO:0009056;GO:0009057;GO:0009987;GO:0019538;GO:0030163;GO:0036211;GO:0043170;GO:0043412;GO:0044238;GO:0050789;GO:0051603;GO:0065007;GO:0070647	GO:0005634;GO:0005737;GO:0043226;GO:0043229;GO:0043231;GO:0110165	4	4	4	29	29	29	17.451	0	77.164	37692000	76	0	C6T533;A0A0R0LC97;A0A0R0HM17;C6TH23;C6SZH2;C6SVG3;A0A0R0LKW3	C6T533;A0A0R0LC97;A0A0R0HM17;C6TH23;C6SZH2;C6SVG3	280	GLYMA_01G163900;GLYMA_02G045700;GLYMA_11G079600;GLYMA_16G123700	KRH08010;KRH28835;KRH69741;KRH76622	KRH08010;KRH28835;KRH69741;KRH76622
19.9379	19.9496	20.088	20.1338	20.3498	20.1363	20.2377	19.5578	19.5601	19.8575	20.1881	19.8717				-1				cellular anatomical entity;chloroplast inner membrane;chloroplast membrane;membrane;organelle inner membrane;organelle membrane;plastid inner membrane;plastid membrane		cellular anatomical entity;membrane				Membrane;Referenceproteome;Transmembrane;Transmembranehelix				GO:0009528;GO:0009706;GO:0016020;GO:0019866;GO:0031090;GO:0031969;GO:0042170;GO:0110165		GO:0016020;GO:0110165	3	3	3	24	24	24	16.437	0	19.236	20710000	31	0	I1JAP1;I1JAP0;A0A0R0HMG3;I1JAN9;C6SX21	I1JAP1;I1JAP0;A0A0R0HMG3;I1JAN9;C6SX21	281	GLYMA_01G234200;GLYMA_11G008700	KRH27684;KRH77792;KRH77793;KRH77794	KRH27684;KRH77792;KRH77793;KRH77794
22.8577	22.522	22.4241	22.1841	22.5311	22.4116	22.674	22.0115	22.0137	22.2801	22.1665	22.0636				-1		cellular localization;cellular macromolecule localization;cellular process;establishment of localization;establishment of localization in cell;establishment of protein localization;intracellular protein transport;intracellular transport;localization;macromolecule localization;nitrogen compound transport;organic substance transport;protein localization;protein transport;transport;vesicle-mediated …	anion binding;binding;carbohydrate derivative binding;catalytic activity;GTP binding;GTPase activity;guanyl nucleotide binding;guanyl ribonucleotide binding;heterocyclic compound binding;hydrolase activity;hydrolase activity, acting on acid anhydrides;hydrolase activity, acting on acid anhydrides, in phosphorus-containing anhydrides;ion binding;nucleoside phosphate binding;nucleotide binding;orga…	cellular anatomical entity;Golgi apparatus;intracellular membrane-bounded organelle;intracellular organelle;membrane-bounded organelle;organelle	cellular localization;cellular process;establishment of localization;intracellular protein transport;localization;macromolecule localization;protein localization;protein transport;transport;vesicle-mediated transport	cellular anatomical entity;Golgi apparatus;intracellular membrane-bounded organelle;intracellular organelle;organelle		Arf		ER-Golgitransport;Golgiapparatus;GTP-binding;Lipoprotein;Myristate;Nucleotide-binding;Proteintransport;Referenceproteome;Signal;Transport		GO:0006810;GO:0006886;GO:0008104;GO:0009987;GO:0015031;GO:0016192;GO:0033036;GO:0045184;GO:0046907;GO:0051179;GO:0051234;GO:0051641;GO:0051649;GO:0070727;GO:0071702;GO:0071705	GO:0000166;GO:0003824;GO:0003924;GO:0005488;GO:0005525;GO:0016462;GO:0016787;GO:0016817;GO:0016818;GO:0017076;GO:0017111;GO:0019001;GO:0032553;GO:0032555;GO:0032561;GO:0035639;GO:0036094;GO:0043167;GO:0043168;GO:0097159;GO:0097367;GO:1901265;GO:1901363	GO:0005794;GO:0043226;GO:0043227;GO:0043229;GO:0043231;GO:0110165	GO:0006810;GO:0006886;GO:0008104;GO:0009987;GO:0015031;GO:0016192;GO:0033036;GO:0051179;GO:0051234;GO:0051641	GO:0005794;GO:0043226;GO:0043229;GO:0043231;GO:0110165	9	9	9	47.5	47.5	47.5	25.695	0	95.818	224560000	180	0	A0A0R0KXC5;C6SV58;C6T5A1;I1J584;A0A0R0HMR0;A0A0R0I1I9;I1NBF7;I1N5H2;C6SXM4;Q9ZPJ2;I1K1H8;I1J585;I1NBF8;C6SXV3;I1L0L6;A0A0R0F1J0;I1K1H6;C6SX15;I1K1H7;A0A0R0HCK0	A0A0R0KXC5;C6SV58;C6T5A1;I1J584;A0A0R0HMR0;A0A0R0I1I9;I1NBF7;I1N5H2;C6SXM4;Q9ZPJ2;I1K1H8;I1J585;I1NBF8;C6SXV3;I1L0L6;A0A0R0F1J0;I1K1H6	283	GLYMA_01G029800;GLYMA_02G009600;GLYMA_02G035600;GLYMA_05G006000;GLYMA_08G285600;GLYMA_09G030900;GLYMA_10G010200;GLYMA_10G145100;GLYMA_18G139400;GLYMA_19G006400;GLYMA_19G219200;GLYMA_20G094200	KRG90489;KRG90490;KRG90491;KRG93262;KRG93263;KRG93264;KRG96565;KRG96566;KRG96567;KRG96568;KRG96569;KRG99353;KRG99354;KRH31757;KRH31758;KRH33778;KRH33779;KRH33780;KRH33781;KRH36902;KRH36903;KRH45651;KRH56583;KRH56584;KRH56585;KRH69176;KRH69574;KRH69575;KRH74582;KRH74583;KRH74584;KRH74585	KRG90489;KRG90490;KRG90491;KRG93262;KRG93263;KRG93264;KRG96565;KRG96566;KRG96567;KRG96568;KRG96569;KRG99353;KRG99354;KRH31757;KRH31758;KRH33778;KRH33779;KRH33780;KRH33781;KRH36902;KRH36903;KRH45651;KRH56583;KRH56584;KRH56585;KRH69176;KRH69574;KRH69575;KRH74582;KRH74583;KRH74584;KRH74585
16.31	17.1357	17.7177	18.0427	16.8287	16.7741	15.8615	16.197	16.426	16.6479	16.2701	16.5257				-1				cellular anatomical entity;cytoplasm		cellular anatomical entity;cytoplasm		BSD		Referenceproteome				GO:0005737;GO:0110165		GO:0005737;GO:0110165	1	1	1	5.5	5.5	5.5	50.401	0	4.6711	1030800	2	4	I1JFD2;A0A0R0HNC1	I1JFD2;A0A0R0HNC1	284	GLYMA_02G150000;GLYMA_10G023800	KRH31968;KRH71475	KRH31968;KRH71475
25.4207	25.4968	25.7577	25.4443	25.7234	25.7369	25.5836	25.809	25.8113	25.9451	26.0258	26.0891				-1		catabolic process;cell redox homeostasis;cellular catabolic process;cellular homeostasis;cellular metabolic process;cellular process;homeostatic process;hydrogen peroxide catabolic process;hydrogen peroxide metabolic process;metabolic process;organic substance catabolic process;organic substance metabolic process;reactive oxygen species metabolic process;response to oxidative stress;response to s…	antioxidant activity;catalytic activity;oxidoreductase activity;oxidoreductase activity, acting on peroxide as acceptor;peroxidase activity;peroxiredoxin activity;thioredoxin peroxidase activity;thioredoxin-dependent peroxiredoxin activity		catabolic process;cell redox homeostasis;cellular homeostasis;cellular process;homeostatic process;metabolic process;response to oxidative stress;response to stimulus;response to stress			1-cysPrx_C;AhpC-TSA		Oxidoreductase;Referenceproteome		GO:0006950;GO:0006979;GO:0008152;GO:0009056;GO:0009987;GO:0019725;GO:0042592;GO:0042743;GO:0042744;GO:0044237;GO:0044248;GO:0045454;GO:0050896;GO:0071704;GO:0072593;GO:1901575	GO:0003824;GO:0004601;GO:0008379;GO:0016209;GO:0016491;GO:0016684;GO:0051920;GO:0140824		GO:0006950;GO:0006979;GO:0008152;GO:0009056;GO:0009987;GO:0019725;GO:0042592;GO:0045454;GO:0050896		10	10	10	57	57	57	28.302	0	251.38	2547400000	613	0	A0A0R0HQQ2;A0A0R4J2P7;A0A0R4J495;C6TGM9;A0A0R0KTK4;K7MM65;K7MZB4	A0A0R0HQQ2;A0A0R4J2P7;A0A0R4J495;C6TGM9	285	GLYMA_02G198400;GLYMA_10G078400	KRH32817;KRH32818;KRH72215	KRH32817;KRH32818;KRH72215
22.368	21.9947	21.86	21.5701	21.8914	21.9056	21.9436	22.0298	22.032	22.9572	22.515	22.2292				-1			anion binding;binding;catalytic activity;flavin adenine dinucleotide binding;heterocyclic compound binding;ion binding;nucleoside phosphate binding;nucleotide binding;organic cyclic compound binding;oxidoreductase activity;oxidoreductase activity, acting on NAD(P)H;small molecule binding	cellular anatomical entity;cytoplasm		cellular anatomical entity;cytoplasm		Pyr_redox_2		Redox-activecenter;Referenceproteome			GO:0000166;GO:0003824;GO:0005488;GO:0016491;GO:0016651;GO:0036094;GO:0043167;GO:0043168;GO:0050660;GO:0097159;GO:1901265;GO:1901363	GO:0005737;GO:0110165		GO:0005737;GO:0110165	15	15	3	45.5	45.5	10.9	47.039	0	256.68	386870000	314	0	A0A0R0HR30;C6T037;C6T6W0	A0A0R0HR30	286	GLYMA_11G209100	KRH30834	KRH30834
20.0451	15.6797	18.8594	17.191	19.5075	15.8069	16.2312	18.7387	18.7409	19.4354	18.9804	19.3306				-1		alcohol biosynthetic process;alcohol metabolic process;aromatic compound biosynthetic process;biosynthetic process;cellular aromatic compound metabolic process;cellular biosynthetic process;cellular metabolic process;cellular nitrogen compound biosynthetic process;cellular nitrogen compound metabolic process;cellular process;diol biosynthetic process;diol metabolic process;heterocycle biosyntheti…	4-alpha-hydroxytetrahydrobiopterin dehydratase activity;carbon-oxygen lyase activity;catalytic activity;hydro-lyase activity;lyase activity	cellular anatomical entity;intracellular membrane-bounded organelle;intracellular organelle;membrane-bounded organelle;organelle;plastid	alcohol metabolic process;biosynthetic process;cellular aromatic compound metabolic process;cellular nitrogen compound metabolic process;cellular process;heterocycle metabolic process;metabolic process;nitrogen compound metabolic process;pteridine-containing compound biosynthetic process;small molecule metabolic process	cellular anatomical entity;intracellular membrane-bounded organelle;intracellular organelle;organelle;plastid		Pterin_4a		Lyase;Referenceproteome		GO:0006066;GO:0006725;GO:0006729;GO:0006807;GO:0008152;GO:0009058;GO:0009987;GO:0018130;GO:0019438;GO:0019751;GO:0034311;GO:0034312;GO:0034641;GO:0042558;GO:0042559;GO:0044237;GO:0044249;GO:0044271;GO:0044281;GO:0044283;GO:0046146;GO:0046165;GO:0046173;GO:0046483;GO:0071704;GO:1901360;GO:1901362;GO:1901564;GO:1901566;GO:1901576;GO:1901615;GO:1901617	GO:0003824;GO:0008124;GO:0016829;GO:0016835;GO:0016836	GO:0009536;GO:0043226;GO:0043227;GO:0043229;GO:0043231;GO:0110165	GO:0006066;GO:0006725;GO:0006807;GO:0008152;GO:0009058;GO:0009987;GO:0034641;GO:0042559;GO:0044281;GO:0046483	GO:0009536;GO:0043226;GO:0043229;GO:0043231;GO:0110165	4	4	2	25.5	25.5	15.7	23.921	0	5.2656	9335300	12	4	A0A0R0HS87	A0A0R0HS87	287	GLYMA_10G117200	KRH33344	KRH33344
20.1099	20.9882	20.1936	21.1557	20.9681	20.7438	20.3838	19.8216	19.8239	19.3435	19.2118	20.0613				-1		amino sugar catabolic process;amino sugar metabolic process;aminoglycan catabolic process;aminoglycan metabolic process;carbohydrate derivative catabolic process;carbohydrate derivative metabolic process;carbohydrate metabolic process;catabolic process;cell wall macromolecule catabolic process;cell wall macromolecule metabolic process;chitin catabolic process;chitin metabolic process;defense resp…	binding;carbohydrate derivative binding;catalytic activity;chitin binding;chitinase activity;hydrolase activity;hydrolase activity, acting on glycosyl bonds;hydrolase activity, hydrolyzing O-glycosyl compounds		carbohydrate derivative metabolic process;carbohydrate metabolic process;catabolic process;macromolecule catabolic process;macromolecule metabolic process;metabolic process;nitrogen compound metabolic process;primary metabolic process;response to stimulus;response to stress			Glyco_hydro_19		Chitin-binding;Disulfidebond;Plantdefense;Referenceproteome		GO:0005975;GO:0006022;GO:0006026;GO:0006030;GO:0006032;GO:0006040;GO:0006807;GO:0006950;GO:0006952;GO:0008152;GO:0009056;GO:0009057;GO:0016998;GO:0043170;GO:0044036;GO:0044238;GO:0046348;GO:0050896;GO:0071704;GO:1901071;GO:1901072;GO:1901135;GO:1901136;GO:1901564;GO:1901565;GO:1901575	GO:0003824;GO:0004553;GO:0004568;GO:0005488;GO:0008061;GO:0016787;GO:0016798;GO:0097367		GO:0005975;GO:0006807;GO:0006950;GO:0008152;GO:0009056;GO:0009057;GO:0043170;GO:0044238;GO:0050896;GO:1901135		2	2	2	12.3	12.3	12.3	25.873	0	27.303	16727000	37	0	C6T397;A0A0R0HSB0	C6T397;A0A0R0HSB0	288	GLYMA_11G124500	KRH29572	KRH29572
20.0402	19.0396	19.1425	19.3974	19.1842	19.2166	19.4398	15.8468	15.9747	15.3577	19.6576	15.6896				-1		biological process involved in interspecies interaction between organisms;defense response;defense response to other organism;defense response to symbiont;defense response to virus;response to biotic stimulus;response to external biotic stimulus;response to external stimulus;response to other organism;response to stimulus;response to stress;response to virus	binding;nucleic acid binding;organic cyclic compound binding;RNA 7-methylguanosine cap binding;RNA binding;RNA cap binding;translation factor activity, RNA binding;translation initiation factor activity;translation regulator activity;translation regulator activity, nucleic acid binding	cellular anatomical entity;cytoplasm;eukaryotic translation initiation factor 4F complex;intracellular membrane-bounded organelle;intracellular organelle;intracellular protein-containing complex;membrane-bounded organelle;nucleus;organelle;protein-containing complex;RNA cap binding complex	biological process involved in interspecies interaction between organisms;defense response to other organism;response to biotic stimulus;response to external stimulus;response to stimulus;response to stress	cellular anatomical entity;cytoplasm;intracellular membrane-bounded organelle;intracellular organelle;nucleus;organelle;protein-containing complex		IF4E		Host-virusinteraction;Initiationfactor;Proteinbiosynthesis;Referenceproteome;RNA-binding;Translationregulation		GO:0006950;GO:0006952;GO:0009605;GO:0009607;GO:0009615;GO:0043207;GO:0044419;GO:0050896;GO:0051607;GO:0051707;GO:0098542;GO:0140546	GO:0000339;GO:0000340;GO:0003676;GO:0003723;GO:0003743;GO:0005488;GO:0008135;GO:0045182;GO:0090079;GO:0097159	GO:0005634;GO:0005737;GO:0016281;GO:0032991;GO:0034518;GO:0043226;GO:0043227;GO:0043229;GO:0043231;GO:0110165;GO:0140535	GO:0006950;GO:0009605;GO:0009607;GO:0044419;GO:0050896;GO:0098542	GO:0005634;GO:0005737;GO:0032991;GO:0043226;GO:0043229;GO:0043231;GO:0110165	1	1	1	6.5	6.5	6.5	22.506	0	5.6834	5082400	11	4	A0A0R0HT24;I1LAR9;C6TKG0	A0A0R0HT24;I1LAR9;C6TKG0	290	GLYMA_10G136100;GLYMA_20G085800	KRG90357;KRH33615;KRH33616	KRG90357;KRH33615;KRH33616
23.6252	24.4102	23.7567	23.7141	24.2421	23.8816	23.2196	23.7085	23.7108	23.5287	23.6985	23.1966				-1		biological regulation;negative regulation of biological process;negative regulation of biosynthetic process;negative regulation of carbohydrate metabolic process;negative regulation of cellular metabolic process;negative regulation of cellular process;negative regulation of metabolic process;negative regulation of photosynthesis;negative regulation of reductive pentose-phosphate cycle;regulation …		cellular anatomical entity;chloroplast;intracellular membrane-bounded organelle;intracellular organelle;membrane-bounded organelle;organelle;plastid	biological regulation;regulation of biological process;regulation of metabolic process	cellular anatomical entity;chloroplast;intracellular membrane-bounded organelle;intracellular organelle;organelle;plastid		CP12		Disulfidebond;Referenceproteome		GO:0006109;GO:0009889;GO:0009890;GO:0009892;GO:0010109;GO:0010110;GO:0019222;GO:0031323;GO:0031324;GO:0043255;GO:0045912;GO:0048519;GO:0048523;GO:0050789;GO:0050794;GO:0065007;GO:0080090;GO:0080152;GO:0080153;GO:1905156		GO:0009507;GO:0009536;GO:0043226;GO:0043227;GO:0043229;GO:0043231;GO:0110165	GO:0019222;GO:0050789;GO:0065007	GO:0009507;GO:0009536;GO:0043226;GO:0043229;GO:0043231;GO:0110165	5	4	4	48.1	40.3	40.3	13.852	0	63.453	325230000	268	0	A0A0R0HT35;A0A0R0KX70	A0A0R0HT35;A0A0R0KX70	291	GLYMA_02G012500;GLYMA_10G012900	KRH31794;KRH69219	KRH31794;KRH69219
17.0901	17.287	17.5345	17.3014	17.2771	17.7881	18.14	18.0773	18.1757	16.237	15.9523	17.9995				-1		carbohydrate metabolic process;metabolic process;organic substance metabolic process;primary metabolic process	catalytic activity;hydrolase activity;hydrolase activity, acting on glycosyl bonds;hydrolase activity, hydrolyzing O-glycosyl compounds		carbohydrate metabolic process;metabolic process;primary metabolic process			Glyco_hydro_2;Glyco_hydro_2_C;Ig_GlcNase;Mannosidase_ig		Disulfidebond;Glycosidase;Hydrolase;Referenceproteome		GO:0005975;GO:0008152;GO:0044238;GO:0071704	GO:0003824;GO:0004553;GO:0016787;GO:0016798		GO:0005975;GO:0008152;GO:0044238		2	2	2	5.8	5.8	5.8	106	0	2.7388	2517900	6	2	A0A0R0HTJ4;I1NIZ2;I1LBC5;A0A0R0EQB5	A0A0R0HTJ4;I1NIZ2;I1LBC5;A0A0R0EQB5	292	GLYMA_10G154400;GLYMA_20G233900	KRG92848;KRG92849;KRH33946;KRH33947	KRG92848;KRG92849;KRH33946;KRH33947
21.7543	23.1947	23.2022	23.5714	23.27	23.0816	23.7871	21.539	21.5412	22.2191	22.869	22.7907				-1		aromatic compound biosynthetic process;biosynthetic process;cellular aromatic compound metabolic process;cellular biosynthetic process;cellular metabolic process;cellular process;metabolic process;organic cyclic compound biosynthetic process;organic cyclic compound metabolic process;organic substance biosynthetic process;organic substance metabolic process;phenylpropanoid biosynthetic process;phe…		apoplast;cellular anatomical entity;extracellular region	biosynthetic process;cellular aromatic compound metabolic process;cellular process;metabolic process;secondary metabolic process	cellular anatomical entity;extracellular region		Dirigent		Apoplast;Referenceproteome;Secreted;Signal		GO:0006725;GO:0008152;GO:0009058;GO:0009698;GO:0009699;GO:0009987;GO:0019438;GO:0019748;GO:0044237;GO:0044249;GO:0044550;GO:0071704;GO:1901360;GO:1901362;GO:1901576		GO:0005576;GO:0048046;GO:0110165	GO:0006725;GO:0008152;GO:0009058;GO:0009987;GO:0019748	GO:0005576;GO:0110165	4	4	4	25.1	25.1	25.1	20.536	0	86.428	218330000	171	0	C6T0B0;A0A0R0HTQ0	C6T0B0;A0A0R0HTQ0	293	GLYMA_11G150300	KRH29972	KRH29972
19.5315	19.6864	19.8381	19.8156	19.9129	19.6507	20.0906	19.4621	19.4643	20.6838	20.4215	19.887				-1										Referenceproteome							3	3	3	20.4	20.4	20.4	25.959	0	29.127	19833000	15	0	A0A0R0HTS2;A0A0R0ES31;A0A0R0HTY3	A0A0R0HTS2;A0A0R0ES31;A0A0R0HTY3	294	GLYMA_10G157000;GLYMA_20G231700	KRG92820;KRH33982;KRH33983;KRH33984	KRG92820;KRH33982;KRH33983;KRH33984
16.5733	18.5336	15.9364	18.9067	16.4319	17.1725	18.7356	17.6545	17.6567	18.0625	15.0222	16.5131				-1								DUF4057		Referenceproteome							1	1	1	5.6	5.6	5.6	24.585	0	9.6405	2055300	12	6	I1MYS5;A0A0R0HUB5;K7LS61;I1MYS4	I1MYS5;A0A0R0HUB5;K7LS61;I1MYS4	295	GLYMA_11G240000;GLYMA_18G017400	KRG97583;KRG97584;KRG97585;KRG97586;KRH31288;KRH31289	KRG97583;KRG97584;KRG97585;KRG97586;KRH31288;KRH31289
17.3225	18.9297	18.3405	17.9558	15.4415	17.4262	17.392	17.8083	17.8105	18.1907	15.0974	18.5914				-1			channel activity;inorganic molecular entity transmembrane transporter activity;passive transmembrane transporter activity;salt transmembrane transporter activity;transmembrane transporter activity;transporter activity;water channel activity;water transmembrane transporter activity	cellular anatomical entity;membrane;plasma membrane		cellular anatomical entity;membrane;plasma membrane		MIP	AIYAR_COBRA1_TARGETS_UP;BIDUS_METASTASIS_DN;BROWNE_HCMV_INFECTION_1HR_DN;BROWNE_HCMV_INFECTION_48HR_DN;BROWNE_HCMV_INFECTION_4HR_DN;DOANE_BREAST_CANCER_CLASSES_UP;DOANE_BREAST_CANCER_ESR1_UP;DOANE_RESPONSE_TO_ANDROGEN_UP;FARMER_BREAST_CANCER_APOCRINE_VS_BASAL;FARMER_BREAST_CANCER_APOCRINE_VS_LUMINAL;JINESH_BLEBBISHIELD_TO_IMMUNE_CELL_FUSION_PBSHMS_DN;LIEN_BREAST_CARCINOMA_METAPLASTIC_VS_DUCTAL_DN…	Membrane;Referenceproteome;Transmembrane;Transmembranehelix;Transport			GO:0005215;GO:0005372;GO:0015250;GO:0015267;GO:0015318;GO:0022803;GO:0022857;GO:1901702	GO:0005886;GO:0016020;GO:0110165		GO:0005886;GO:0016020;GO:0110165	1	1	1	4.9	4.9	4.9	30.642	0	14.637	2558700	9	3	E0A2W0;C6TDZ1;A0A0R0HUK1	E0A2W0;C6TDZ1;A0A0R0HUK1	297	GLYMA_11G146500;GLYMA_12G075400	KRH25011;KRH29919	KRH25011;KRH29919
19.5623	18.7327	18.0986	15.0666	17.374	18.5446	18.4063	19.4465	19.4488	19.9254	19.0072	19.2975				-1		macromolecule metabolic process;metabolic process;nitrogen compound metabolic process;organic substance metabolic process;organonitrogen compound metabolic process;primary metabolic process;protein metabolic process;proteolysis	catalytic activity;catalytic activity, acting on a protein;endopeptidase activity;hydrolase activity;peptidase activity;serine hydrolase activity;serine-type endopeptidase activity;serine-type peptidase activity	cellular anatomical entity;intracellular membrane-bounded organelle;intracellular organelle;membrane-bounded organelle;organelle	macromolecule metabolic process;metabolic process;nitrogen compound metabolic process;primary metabolic process;protein metabolic process;proteolysis	cellular anatomical entity;intracellular membrane-bounded organelle;intracellular organelle;organelle		PDZ_2;PDZ_3;Trypsin_2		Referenceproteome		GO:0006508;GO:0006807;GO:0008152;GO:0019538;GO:0043170;GO:0044238;GO:0071704;GO:1901564	GO:0003824;GO:0004175;GO:0004252;GO:0008233;GO:0008236;GO:0016787;GO:0017171;GO:0140096	GO:0043226;GO:0043227;GO:0043229;GO:0043231;GO:0110165	GO:0006508;GO:0006807;GO:0008152;GO:0019538;GO:0043170;GO:0044238	GO:0043226;GO:0043229;GO:0043231;GO:0110165	3	3	3	6.9	6.9	6.9	55.824	0	16.35	10865000	16	1	A0A0R0HVV0;K7K8I2;I1L7Y5	A0A0R0HVV0;K7K8I2;I1L7Y5	298	GLYMA_02G152400;GLYMA_10G021800	KRH31928;KRH31929;KRH71528	KRH31928;KRH31929;KRH71528
21.1522	20.486	20.2729	20.2051	20.1311	20.3672	20.3564	21.2332	21.2354	21.5693	21.1848	21.1178				-1		carboxylic acid metabolic process;cellular aromatic compound metabolic process;cellular metabolic process;cellular nitrogen compound metabolic process;cellular process;dicarboxylic acid metabolic process;heterocycle metabolic process;malate metabolic process;metabolic process;NAD metabolic process;NADH metabolic process;nicotinamide nucleotide metabolic process;nitrogen compound metabolic process…	catalytic activity;L-malate dehydrogenase activity;malate dehydrogenase (NADP+) activity;malate dehydrogenase activity;oxidoreductase activity;oxidoreductase activity, acting on CH-OH group of donors;oxidoreductase activity, acting on the CH-OH group of donors, NAD or NADP as acceptor	cellular anatomical entity;chloroplast;intracellular membrane-bounded organelle;intracellular organelle;membrane-bounded organelle;organelle;plastid	cellular aromatic compound metabolic process;cellular nitrogen compound metabolic process;cellular process;heterocycle metabolic process;metabolic process;nitrogen compound metabolic process;nucleobase-containing compound metabolic process;nucleobase-containing small molecule metabolic process;nucleotide metabolic process;organic acid metabolic process;phosphorus metabolic process;primary metabol…	cellular anatomical entity;chloroplast;intracellular membrane-bounded organelle;intracellular organelle;organelle;plastid		Ldh_1_C;Ldh_1_N		Chloroplast;Disulfidebond;NADP;Oxidoreductase;Plastid;Referenceproteome;Transitpeptide		GO:0006082;GO:0006099;GO:0006107;GO:0006108;GO:0006139;GO:0006163;GO:0006725;GO:0006734;GO:0006753;GO:0006793;GO:0006796;GO:0006807;GO:0008152;GO:0009117;GO:0009987;GO:0019362;GO:0019637;GO:0019674;GO:0019752;GO:0034641;GO:0043436;GO:0043648;GO:0044237;GO:0044238;GO:0044281;GO:0046483;GO:0046496;GO:0055086;GO:0071704;GO:0072521;GO:0072524;GO:1901360;GO:1901564	GO:0003824;GO:0016491;GO:0016614;GO:0016615;GO:0016616;GO:0030060;GO:0046554	GO:0009507;GO:0009536;GO:0043226;GO:0043227;GO:0043229;GO:0043231;GO:0110165	GO:0006082;GO:0006139;GO:0006725;GO:0006793;GO:0006807;GO:0008152;GO:0009117;GO:0009987;GO:0034641;GO:0044238;GO:0044281;GO:0046483;GO:0055086	GO:0009507;GO:0009536;GO:0043226;GO:0043229;GO:0043231;GO:0110165	6	6	6	19.1	19.1	19.1	46.353	0	48.198	84600000	74	0	I1LCM5;K7N4G1;A0A0R0HW29;I1LCM6;C6TE44;C6SX20	I1LCM5;K7N4G1;A0A0R0HW29;I1LCM6	299	GLYMA_10G197700;GLYMA_20G192200	KRG92120;KRH34667;KRH34668;KRH34669	KRG92120;KRH34667;KRH34668;KRH34669
26.6602	25.8008	24.9708	26.1297	25.6151	25.3222	26.0716	26.8886	26.8909	26.9398	27.568	26.3194				-1		cellular metabolic process;cellular process;metabolic process;photosynthesis		bounding membrane of organelle;cellular anatomical entity;chloroplast thylakoid membrane;membrane;membrane protein complex;organelle membrane;organelle outer membrane;outer membrane;photosynthetic membrane;photosystem I reaction center;plastid membrane;plastid thylakoid membrane;protein-containing complex;thylakoid membrane	cellular process;metabolic process;photosynthesis	cellular anatomical entity;membrane;membrane protein complex;outer membrane;protein-containing complex		PSI_PsaE		Membrane;Photosynthesis;PhotosystemI;Referenceproteome		GO:0008152;GO:0009987;GO:0015979;GO:0044237		GO:0009535;GO:0009538;GO:0016020;GO:0019867;GO:0031090;GO:0031968;GO:0032991;GO:0034357;GO:0042170;GO:0042651;GO:0055035;GO:0098588;GO:0098796;GO:0110165	GO:0008152;GO:0009987;GO:0015979	GO:0016020;GO:0019867;GO:0032991;GO:0098796;GO:0110165	3	3	1	40.3	40.3	24	13.747	0	44.077	1301000000	121	0	C6TC81;C6T084;C6SWZ1;A0A0R0HXE9;I1LYS4	C6TC81;C6T084;C6SWZ1;A0A0R0HXE9	300	GLYMA_10G042000;GLYMA_10G042100;GLYMA_13G129500	KRH19675;KRH32277;KRH32278	KRH19675;KRH32277;KRH32278
16.606	15.9955	16.1002	16.054	15.4688	16.1177	15.6538	17.42	17.4222	17.031	16.6194	16.399				-1		macromolecule metabolic process;metabolic process;nitrogen compound metabolic process;organic substance metabolic process;organonitrogen compound metabolic process;primary metabolic process;protein metabolic process;proteolysis	catalytic activity;catalytic activity, acting on a protein;endopeptidase activity;hydrolase activity;peptidase activity;serine hydrolase activity;serine-type endopeptidase activity;serine-type peptidase activity	cellular anatomical entity;cytoplasm	macromolecule metabolic process;metabolic process;nitrogen compound metabolic process;primary metabolic process;protein metabolic process;proteolysis	cellular anatomical entity;cytoplasm		APEH_N;PD40;Peptidase_S9		Hydrolase;Referenceproteome		GO:0006508;GO:0006807;GO:0008152;GO:0019538;GO:0043170;GO:0044238;GO:0071704;GO:1901564	GO:0003824;GO:0004175;GO:0004252;GO:0008233;GO:0008236;GO:0016787;GO:0017171;GO:0140096	GO:0005737;GO:0110165	GO:0006508;GO:0006807;GO:0008152;GO:0019538;GO:0043170;GO:0044238	GO:0005737;GO:0110165	2	2	2	4.7	4.7	4.7	89.581	0	7.481	1448400	34	2	I1L7C1;A0A0R0HYJ0	I1L7C1;A0A0R0HYJ0	302	GLYMA_10G001100	KRH31620;KRH31621	KRH31620;KRH31621
22.5427	21.6847	21.56	21.4336	21.7776	21.8382	21.251	21.8381	21.8272	22.7705	22.6001	22.1346				-1		amide biosynthetic process;amide metabolic process;biosynthetic process;cellular biosynthetic process;cellular metabolic process;cellular nitrogen compound biosynthetic process;cellular nitrogen compound metabolic process;cellular process;macromolecule biosynthetic process;macromolecule metabolic process;metabolic process;nitrogen compound metabolic process;organic substance biosynthetic process;…	binding;nucleic acid binding;organic cyclic compound binding;RNA binding;structural constituent of ribosome;structural molecule activity	cellular anatomical entity;cytoplasm;cytosolic small ribosomal subunit;intracellular membrane-bounded organelle;intracellular organelle;membrane-bounded organelle;nucleus;organelle;protein-containing complex;ribonucleoprotein complex;ribosomal subunit;small ribosomal subunit	amide metabolic process;biosynthetic process;cellular nitrogen compound metabolic process;cellular process;macromolecule biosynthetic process;macromolecule metabolic process;metabolic process;nitrogen compound metabolic process;peptide metabolic process;primary metabolic process;protein metabolic process;translation	cellular anatomical entity;cytoplasm;intracellular membrane-bounded organelle;intracellular organelle;nucleus;organelle;protein-containing complex;ribonucleoprotein complex;small ribosomal subunit		KH_2;Ribosomal_S3_C		Referenceproteome;Ribonucleoprotein;Ribosomalprotein;RNA-binding		GO:0006412;GO:0006518;GO:0006807;GO:0008152;GO:0009058;GO:0009059;GO:0009987;GO:0019538;GO:0034641;GO:0043043;GO:0043170;GO:0043603;GO:0043604;GO:0044237;GO:0044238;GO:0044249;GO:0044271;GO:0071704;GO:1901564;GO:1901566;GO:1901576	GO:0003676;GO:0003723;GO:0003735;GO:0005198;GO:0005488;GO:0097159	GO:0005634;GO:0005737;GO:0015935;GO:0022627;GO:0032991;GO:0043226;GO:0043227;GO:0043229;GO:0043231;GO:0044391;GO:0110165;GO:1990904	GO:0006412;GO:0006518;GO:0006807;GO:0008152;GO:0009058;GO:0009059;GO:0009987;GO:0019538;GO:0034641;GO:0043170;GO:0043603;GO:0044238	GO:0005634;GO:0005737;GO:0015935;GO:0032991;GO:0043226;GO:0043229;GO:0043231;GO:0110165;GO:1990904	13	13	2	62.3	62.3	14.8	26.306	0	74.134	135190000	153	0	A0A0R0I0B9;C6SW15;A0A0R0HSV1	A0A0R0I0B9;C6SW15;A0A0R0HSV1	304	GLYMA_10G133100;GLYMA_10G133800;GLYMA_20G083300	KRG90325;KRH33577;KRH33585	KRG90325;KRH33577;KRH33585
17.462	17.9356	17.4255	17.6933	18.5433	17.2043	17.7213	15.6379	15.5283	17.9523	14.2648	17.9023				-1		aromatic compound biosynthetic process;biosynthetic process;cellular aromatic compound metabolic process;cellular biosynthetic process;cellular component assembly;cellular component organization;cellular component organization or biogenesis;cellular metabolic process;cellular nitrogen compound biosynthetic process;cellular nitrogen compound metabolic process;cellular process;DNA-templated transcr…	binding;cation binding;general transcription initiation factor binding;ion binding;metal ion binding;protein binding;TBP-class protein binding;transcription factor binding	cellular anatomical entity;intracellular membrane-bounded organelle;intracellular organelle;membrane-bounded organelle;nucleus;organelle;protein-containing complex;protein-DNA complex;transcription preinitiation complex	biosynthetic process;cellular aromatic compound metabolic process;cellular component assembly;cellular component organization;cellular component organization or biogenesis;cellular nitrogen compound metabolic process;cellular process;DNA-templated transcription initiation;heterocycle metabolic process;macromolecule biosynthetic process;macromolecule metabolic process;metabolic process;nitrogen co…	cellular anatomical entity;intracellular membrane-bounded organelle;intracellular organelle;nucleus;organelle;protein-containing complex;protein-DNA complex		TF_Zn_Ribbon;TFIIB		Metal-binding;Nucleus;Referenceproteome;Repeat;Transcription;Transcriptionregulation;Zinc;Zinc-finger		GO:0006139;GO:0006352;GO:0006725;GO:0006807;GO:0008152;GO:0009058;GO:0009059;GO:0009987;GO:0016043;GO:0016070;GO:0018130;GO:0019438;GO:0022607;GO:0032774;GO:0034641;GO:0034654;GO:0043170;GO:0043933;GO:0044237;GO:0044238;GO:0044249;GO:0044271;GO:0046483;GO:0065003;GO:0065004;GO:0070897;GO:0071704;GO:0071824;GO:0071840;GO:0090304;GO:1901360;GO:1901362;GO:1901576	GO:0005488;GO:0005515;GO:0008134;GO:0017025;GO:0043167;GO:0043169;GO:0046872;GO:0140296	GO:0005634;GO:0032991;GO:0032993;GO:0043226;GO:0043227;GO:0043229;GO:0043231;GO:0097550;GO:0110165	GO:0006139;GO:0006352;GO:0006725;GO:0006807;GO:0008152;GO:0009058;GO:0009059;GO:0009987;GO:0016043;GO:0016070;GO:0022607;GO:0034641;GO:0043170;GO:0044238;GO:0046483;GO:0065003;GO:0071840	GO:0005634;GO:0032991;GO:0032993;GO:0043226;GO:0043229;GO:0043231;GO:0110165	1	1	1	4.2	4.2	4.2	34.229	0	6.0929	1812700	12	3	P48513;A0A0R0I0L9;I1JG98	P48513;A0A0R0I0L9;I1JG98	305	GLYMA_02G185900;GLYMA_10G108600	KRH33227;KRH72026	KRH33227;KRH72026
19.9396	16.4607	18.4546	17.341	19.521	18.0927	17.1476	17.051	15.0755	20.0453	19.0921	19.2822				-1		cell redox homeostasis;cellular detoxification;cellular homeostasis;cellular metabolic process;cellular oxidant detoxification;cellular process;detoxification;homeostatic process;metabolic process;reactive oxygen species metabolic process;removal of superoxide radicals;superoxide metabolic process	antioxidant activity;catalytic activity;oxidoreductase activity;oxidoreductase activity, acting on a sulfur group of donors;oxidoreductase activity, acting on a sulfur group of donors, NAD(P) as acceptor;thioredoxin-disulfide reductase (NADP) activity	cellular anatomical entity;cytoplasm	cell redox homeostasis;cellular homeostasis;cellular process;detoxification;homeostatic process;metabolic process	cellular anatomical entity;cytoplasm		Pyr_redox_2;Thioredoxin		Disulfidebond;Electrontransport;FAD;Flavoprotein;NADP;Oxidoreductase;Redox-activecenter;Referenceproteome;Transport		GO:0006801;GO:0008152;GO:0009987;GO:0019430;GO:0019725;GO:0042592;GO:0044237;GO:0045454;GO:0072593;GO:0098754;GO:0098869;GO:1990748	GO:0003824;GO:0004791;GO:0016209;GO:0016491;GO:0016667;GO:0016668	GO:0005737;GO:0110165	GO:0008152;GO:0009987;GO:0019725;GO:0042592;GO:0045454;GO:0098754	GO:0005737;GO:0110165	3	3	3	9.9	9.9	9.9	45.116	0	9.2846	8108300	11	5	A0A0R0KYK6;A0A0R0I0S2;I1L9Y6;I1JGA5;A0A0R0KYK4	A0A0R0KYK6;A0A0R0I0S2;I1L9Y6;I1JGA5	307	GLYMA_02G185300;GLYMA_10G113100	KRH33290;KRH33291;KRH72015;KRH72016	KRH33290;KRH33291;KRH72015;KRH72016
17.2941	17.4471	17.7136	17.6794	15.3947	16.9257	17.7231	15.0103	15.2084	15.1534	15.4689	14.8871				-1								PWWP		Referenceproteome							1	1	1	1.2	1.2	1.2	110.83	0.0023943	2.1086	876350	3	6	A0A0R0I0V8;K7K770;K7LIT1	A0A0R0I0V8;K7K770;K7LIT1	308	GLYMA_02G087500;GLYMA_10G116800	KRH33337;KRH33338;KRH33339;KRH70385	KRH33337;KRH33338;KRH33339;KRH70385
20.6407	20.3942	19.2896	19.5277	16.7867	19.7506	19.9822	16.4385	15.2822	20.6323	14.7968	19.693				-1			anion binding;binding;catalytic activity;flavin adenine dinucleotide binding;heterocyclic compound binding;ion binding;nucleoside phosphate binding;nucleotide binding;organic cyclic compound binding;oxidoreductase activity;oxidoreductase activity, acting on NAD(P)H;small molecule binding	cellular anatomical entity;cytoplasm		cellular anatomical entity;cytoplasm		Pyr_redox_2		Redox-activecenter;Referenceproteome			GO:0000166;GO:0003824;GO:0005488;GO:0016491;GO:0016651;GO:0036094;GO:0043167;GO:0043168;GO:0050660;GO:0097159;GO:1901265;GO:1901363	GO:0005737;GO:0110165		GO:0005737;GO:0110165	15	3	3	45.5	10.9	10.9	46.851	0	5.9948	10283000	7	4	A0A0R0I177;C6T9X5	A0A0R0I177;C6T9X5	309	GLYMA_10G067500	KRH32676	KRH32676
20.5194	20.0277	20.5079	20.4053	20.4922	20.7512	20.6085	20.3004	20.3026	20.3586	20.7174	20.1338				-1		alpha-amino acid catabolic process;alpha-amino acid metabolic process;amino acid catabolic process;amino acid metabolic process;aromatic amino acid family catabolic process;aromatic amino acid metabolic process;aromatic compound catabolic process;benzene-containing compound metabolic process;carboxylic acid catabolic process;carboxylic acid metabolic process;catabolic process;cellular aromatic co…	binding;catalytic activity;cation binding;fumarylacetoacetase activity;hydrolase activity;hydrolase activity, acting on acid carbon-carbon bonds;hydrolase activity, acting on acid carbon-carbon bonds, in ketonic substances;ion binding;metal ion binding		amino acid metabolic process;catabolic process;cellular aromatic compound metabolic process;cellular process;metabolic process;monocarboxylic acid metabolic process;nitrogen compound metabolic process;organic acid metabolic process;primary metabolic process;small molecule metabolic process			FAA_hydrolase;FAA_hydrolase_N		Calcium;Hydrolase;Magnesium;Metal-binding;Phenylalaninecatabolism;Referenceproteome;Tyrosinecatabolism		GO:0006082;GO:0006520;GO:0006558;GO:0006559;GO:0006570;GO:0006572;GO:0006725;GO:0006807;GO:0008152;GO:0009056;GO:0009063;GO:0009072;GO:0009074;GO:0009987;GO:0016054;GO:0018958;GO:0019336;GO:0019439;GO:0019752;GO:0032787;GO:0042537;GO:0043436;GO:0044237;GO:0044238;GO:0044248;GO:0044281;GO:0044282;GO:0046395;GO:0071704;GO:0072329;GO:1901360;GO:1901361;GO:1901564;GO:1901565;GO:1901575;GO:1901605;GO:…	GO:0003824;GO:0004334;GO:0005488;GO:0016787;GO:0016822;GO:0016823;GO:0043167;GO:0043169;GO:0046872		GO:0006082;GO:0006520;GO:0006725;GO:0006807;GO:0008152;GO:0009056;GO:0009987;GO:0032787;GO:0044238;GO:0044281		9	9	9	36.5	36.5	36.5	40.537	0	33.677	65561000	103	0	A0A0R0I1W6;A0A0R0I1V0;I1KZY9;C6THZ4;C6TGR8;I1MFN0	A0A0R0I1W6;A0A0R0I1V0;I1KZY9;C6THZ4;C6TGR8;I1MFN0	310	GLYMA_09G010000;GLYMA_15G114300	KRH11524;KRH36538;KRH36539;KRH36540	KRH11524;KRH36538;KRH36539;KRH36540
19.5009	21.1965	21.6142	21.857	21.5758	21.3032	22.2507	20.1248	20.1269	20.3846	20.9072	20.3853				-1		catabolic process;cellular catabolic process;cellular metabolic process;cellular process;hydrogen peroxide catabolic process;hydrogen peroxide metabolic process;metabolic process;organic substance catabolic process;organic substance metabolic process;reactive oxygen species metabolic process;response to oxidative stress;response to stimulus;response to stress	antioxidant activity;binding;catalytic activity;cation binding;heme binding;ion binding;lactoperoxidase activity;metal ion binding;organic cyclic compound binding;oxidoreductase activity;oxidoreductase activity, acting on peroxide as acceptor;peroxidase activity;tetrapyrrole binding	cell wall;cellular anatomical entity;external encapsulating structure;extracellular region;plant-type cell wall	catabolic process;cellular process;metabolic process;response to oxidative stress;response to stimulus;response to stress	cell wall;cellular anatomical entity;external encapsulating structure;extracellular region		peroxidase		Calcium;Disulfidebond;Heme;Hydrogenperoxide;Iron;Metal-binding;Oxidoreductase;Peroxidase;Referenceproteome;Secreted;Signal		GO:0006950;GO:0006979;GO:0008152;GO:0009056;GO:0009987;GO:0042743;GO:0042744;GO:0044237;GO:0044248;GO:0050896;GO:0071704;GO:0072593;GO:1901575	GO:0003824;GO:0004601;GO:0005488;GO:0016209;GO:0016491;GO:0016684;GO:0020037;GO:0043167;GO:0043169;GO:0046872;GO:0046906;GO:0097159;GO:0140825	GO:0005576;GO:0005618;GO:0009505;GO:0030312;GO:0110165	GO:0006950;GO:0006979;GO:0008152;GO:0009056;GO:0009987;GO:0050896	GO:0005576;GO:0005618;GO:0030312;GO:0110165	12	12	12	47.7	47.7	47.7	37.958	0	125.73	96010000	108	0	A0A0R0I1Y7	A0A0R0I1Y7	312	GLYMA_10G222500	KRH35106	KRH35106
20.2558	21.7191	21.2865	21.9732	21.7095	22.0681	22.0047	20.3376	20.3916	20.6518	21.1719	21.4755				-1		catabolic process;cellular catabolic process;cellular metabolic process;cellular process;hydrogen peroxide catabolic process;hydrogen peroxide metabolic process;metabolic process;organic substance catabolic process;organic substance metabolic process;reactive oxygen species metabolic process;response to oxidative stress;response to stimulus;response to stress	antioxidant activity;binding;catalytic activity;cation binding;heme binding;ion binding;lactoperoxidase activity;metal ion binding;organic cyclic compound binding;oxidoreductase activity;oxidoreductase activity, acting on peroxide as acceptor;peroxidase activity;tetrapyrrole binding	cellular anatomical entity;extracellular region	catabolic process;cellular process;metabolic process;response to oxidative stress;response to stimulus;response to stress	cellular anatomical entity;extracellular region		peroxidase		Calcium;Disulfidebond;Heme;Hydrogenperoxide;Iron;Metal-binding;Oxidoreductase;Peroxidase;Referenceproteome;Secreted;Signal		GO:0006950;GO:0006979;GO:0008152;GO:0009056;GO:0009987;GO:0042743;GO:0042744;GO:0044237;GO:0044248;GO:0050896;GO:0071704;GO:0072593;GO:1901575	GO:0003824;GO:0004601;GO:0005488;GO:0016209;GO:0016491;GO:0016684;GO:0020037;GO:0043167;GO:0043169;GO:0046872;GO:0046906;GO:0097159;GO:0140825	GO:0005576;GO:0110165	GO:0006950;GO:0006979;GO:0008152;GO:0009056;GO:0009987;GO:0050896	GO:0005576;GO:0110165	8	8	7	28.2	28.2	25.6	38.575	0	61.827	92796000	136	0	C6TB83;A0A0R0I2M6;O23961;A0A0R4J5A2;Q42784	C6TB83;A0A0R0I2M6;O23961;A0A0R4J5A2	314	GLYMA_09G022400;GLYMA_15G128700	KRH11762;KRH36764	KRH11762;KRH36764
17.6857	17.8238	17.9794	18.0369	17.7209	18.0049	18.4992	17.2805	17.2827	16.255	14.8833	17.4336				-1		assembly of large subunit precursor of preribosome;cellular aromatic compound metabolic process;cellular component assembly;cellular component biogenesis;cellular component organization;cellular component organization or biogenesis;cellular localization;cellular metabolic process;cellular nitrogen compound metabolic process;cellular process;cytosolic ribosome assembly;establishment of localizatio…	binding;nucleic acid binding;organic cyclic compound binding;protein-containing complex binding;ribonucleoprotein complex binding;ribosomal large subunit binding;ribosome binding;translation factor activity, RNA binding;translation initiation factor activity;translation regulator activity;translation regulator activity, nucleic acid binding	cellular anatomical entity;cytoplasm;cytosol;intracellular non-membrane-bounded organelle;intracellular organelle;non-membrane-bounded organelle;nucleolus;organelle;preribosome;preribosome, large subunit precursor;protein-containing complex;ribonucleoprotein complex	cellular aromatic compound metabolic process;cellular component assembly;cellular component biogenesis;cellular component organization;cellular component organization or biogenesis;cellular localization;cellular nitrogen compound metabolic process;cellular process;establishment of localization;heterocycle metabolic process;localization;macromolecule metabolic process;metabolic process;nitrogen co…	cellular anatomical entity;cytoplasm;cytosol;intracellular non-membrane-bounded organelle;intracellular organelle;non-membrane-bounded organelle;nucleolus;organelle;preribosome;protein-containing complex;ribonucleoprotein complex		eIF-6	BANDRES_RESPONSE_TO_CARMUSTIN_MGMT_48HR_DN;BERENJENO_TRANSFORMED_BY_RHOA_UP;BIOCARTA_EIF_PATHWAY;BLALOCK_ALZHEIMERS_DISEASE_DN;CARRILLOREIXACH_MRS3_VS_LOWER_RISK_HEPATOBLASTOMA_UP;ENK_UV_RESPONSE_KERATINOCYTE_UP;GRADE_COLON_AND_RECTAL_CANCER_UP;IVANOVA_HEMATOPOIESIS_INTERMEDIATE_PROGENITOR;KIM_ALL_DISORDERS_DURATION_CORR_DN;KIM_ALL_DISORDERS_OLIGODENDROCYTE_NUMBER_CORR_UP;KIM_BIPOLAR_DISORDER_OLI…	Cytoplasm;Initiationfactor;Nucleus;Proteinbiosynthesis;Referenceproteome;Ribosomebiogenesis		GO:0000054;GO:0000460;GO:0000470;GO:0006139;GO:0006364;GO:0006396;GO:0006725;GO:0006807;GO:0006810;GO:0006913;GO:0006996;GO:0008152;GO:0009987;GO:0016043;GO:0016070;GO:0016072;GO:0022607;GO:0022613;GO:0022618;GO:0031503;GO:0033750;GO:0034470;GO:0034641;GO:0034660;GO:0042255;GO:0042256;GO:0042273;GO:0043170;GO:0043933;GO:0044085;GO:0044237;GO:0044238;GO:0046483;GO:0046907;GO:0051168;GO:0051169;GO:…	GO:0003676;GO:0003743;GO:0005488;GO:0008135;GO:0043021;GO:0043022;GO:0043023;GO:0044877;GO:0045182;GO:0090079;GO:0097159	GO:0005730;GO:0005737;GO:0005829;GO:0030684;GO:0030687;GO:0032991;GO:0043226;GO:0043228;GO:0043229;GO:0043232;GO:0110165;GO:1990904	GO:0000054;GO:0006139;GO:0006364;GO:0006396;GO:0006725;GO:0006807;GO:0006810;GO:0006913;GO:0006996;GO:0008152;GO:0009987;GO:0016043;GO:0016070;GO:0016072;GO:0022607;GO:0022618;GO:0034641;GO:0042255;GO:0042273;GO:0043170;GO:0044085;GO:0044238;GO:0046483;GO:0051169;GO:0051179;GO:0051234;GO:0051640;GO:0051641;GO:0065003;GO:0070925;GO:0071840	GO:0005730;GO:0005737;GO:0005829;GO:0030684;GO:0032991;GO:0043226;GO:0043228;GO:0043229;GO:0043232;GO:0110165;GO:1990904	1	1	1	26.3	26.3	26.3	12.659	0	3.6706	2281900	34	0	A0A0R0I2S1;K7LK09;I1NIE5;I1MQC8;I1L3P5	A0A0R0I2S1;K7LK09;I1NIE5;I1MQC8;I1L3P5	315	GLYMA_09G158100;GLYMA_10G175400;GLYMA_16G208600;GLYMA_20G215000	KRG92498;KRG92499;KRH09298;KRH09299;KRH09300;KRH34308;KRH34309;KRH38790	KRG92498;KRG92499;KRH09298;KRH09299;KRH09300;KRH34308;KRH34309;KRH38790
19.6164	16.9173	20.1005	17.0818	19.4711	21.0026	15.2388	20.0566	20.0588	20.5396	19.2123	19.9947				-1		amide biosynthetic process;amide metabolic process;biosynthetic process;cellular biosynthetic process;cellular metabolic process;cellular nitrogen compound biosynthetic process;cellular nitrogen compound metabolic process;cellular process;macromolecule biosynthetic process;macromolecule metabolic process;metabolic process;nitrogen compound metabolic process;organic substance biosynthetic process;…	binding;cation binding;ion binding;metal ion binding;nucleic acid binding;organic cyclic compound binding;RNA binding;structural constituent of ribosome;structural molecule activity;transition metal ion binding;zinc ion binding	cellular anatomical entity;cytosolic small ribosomal subunit;membrane;protein-containing complex;ribonucleoprotein complex;ribosomal subunit;small ribosomal subunit	amide metabolic process;biosynthetic process;cellular nitrogen compound metabolic process;cellular process;macromolecule biosynthetic process;macromolecule metabolic process;metabolic process;nitrogen compound metabolic process;peptide metabolic process;primary metabolic process;protein metabolic process;translation	cellular anatomical entity;membrane;protein-containing complex;ribonucleoprotein complex;small ribosomal subunit		Ribosomal_S14		Membrane;Referenceproteome;Ribonucleoprotein;Ribosomalprotein;Transmembrane;Transmembranehelix		GO:0006412;GO:0006518;GO:0006807;GO:0008152;GO:0009058;GO:0009059;GO:0009987;GO:0019538;GO:0034641;GO:0043043;GO:0043170;GO:0043603;GO:0043604;GO:0044237;GO:0044238;GO:0044249;GO:0044271;GO:0071704;GO:1901564;GO:1901566;GO:1901576	GO:0003676;GO:0003723;GO:0003735;GO:0005198;GO:0005488;GO:0008270;GO:0043167;GO:0043169;GO:0046872;GO:0046914;GO:0097159	GO:0015935;GO:0016020;GO:0022627;GO:0032991;GO:0044391;GO:0110165;GO:1990904	GO:0006412;GO:0006518;GO:0006807;GO:0008152;GO:0009058;GO:0009059;GO:0009987;GO:0019538;GO:0034641;GO:0043170;GO:0043603;GO:0044238	GO:0015935;GO:0016020;GO:0032991;GO:0110165;GO:1990904	2	2	2	16.5	16.5	16.5	11.885	0	3.2837	17034000	28	3	A0A0R0I6D2	A0A0R0I6D2	317	GLYMA_10G258500	KRH35688	KRH35688
18.9169	16.1841	16.5156	15.3896	19.1368	18.386	18.8516	18.088	18.0903	19.0938	18.7252	18.3341				-1			catalytic activity;hydrolase activity	cellular anatomical entity;cytoplasm		cellular anatomical entity;cytoplasm		cobW;CobW_C		Hydrolase;Referenceproteome			GO:0003824;GO:0016787	GO:0005737;GO:0110165		GO:0005737;GO:0110165	1	1	1	3.1	3.1	3.1	49.62	0	2.8852	4069400	5	3	A0A0R0I7G4;I1NJ60	A0A0R0I7G4;I1NJ60	320	GLYMA_10G291200;GLYMA_20G240400	KRG92963;KRH36213	KRG92963;KRH36213
20.4845	17.8796	18.6712	18.5187	18.6577	18.7168	18.5153	18.4011	18.4033	19.6589	17.6009	18.9305				-1		cellular metabolic process;cellular process;metabolic process;phosphate-containing compound metabolic process;phosphorus metabolic process;phosphorylation	adenyl nucleotide binding;adenyl ribonucleotide binding;anion binding;ATP binding;binding;carbohydrate binding;carbohydrate derivative binding;catalytic activity;heterocyclic compound binding;ion binding;kinase activity;nucleoside phosphate binding;nucleotide binding;organic cyclic compound binding;polysaccharide binding;purine nucleotide binding;purine ribonucleoside triphosphate binding;purine …		cellular process;metabolic process;phosphorus metabolic process;phosphorylation			CBM_20;PPDK_N		Referenceproteome		GO:0006793;GO:0006796;GO:0008152;GO:0009987;GO:0016310;GO:0044237	GO:0000166;GO:0003824;GO:0005488;GO:0005524;GO:0016301;GO:0016740;GO:0016772;GO:0017076;GO:0030246;GO:0030247;GO:0030554;GO:0032553;GO:0032555;GO:0032559;GO:0035639;GO:0036094;GO:0043167;GO:0043168;GO:0097159;GO:0097367;GO:1901265;GO:1901363;GO:2001070		GO:0006793;GO:0008152;GO:0009987;GO:0016310		5	5	5	6.7	6.7	6.7	127.9	0	14.93	7927600	36	0	A0A0R0I7Q2	A0A0R0I7Q2	322	GLYMA_10G298000	KRH36357	KRH36357
16.0757	15.2052	15.1144	14.7972	14.8827	15.3708	15.7507	16.3865	15.0072	16.4137	16.2283	15.5766				-1				cellular anatomical entity;membrane		cellular anatomical entity;membrane				Coiledcoil;Membrane;Referenceproteome;Transmembrane;Transmembranehelix				GO:0016020;GO:0110165		GO:0016020;GO:0110165	1	1	1	3.7	3.7	3.7	66.511	0	4.0572	400630	4	4	A0A0R0IE75;K7LDR7;A0A0R0I842;K7LDR6;A0A0R0I851;A0A0R0IEU9	A0A0R0IE75;K7LDR7;A0A0R0I842;K7LDR6;A0A0R0I851;A0A0R0IEU9	323	GLYMA_09G136800	KRH38454;KRH38455;KRH38456;KRH38457;KRH38458;KRH38459	KRH38454;KRH38455;KRH38456;KRH38457;KRH38458;KRH38459
23.2823	22.1921	22.3417	21.8585	21.7685	22.3886	21.4608	22.5873	22.5895	23.3224	23.1247	22.6507				-1		cellular metabolic process;cellular process;generation of precursor metabolites and energy;metabolic process;photosynthesis, light harvesting;photosynthesis, light harvesting in photosystem I;response to abiotic stimulus;response to light stimulus;response to radiation;response to stimulus	binding;chlorophyll binding;organic cyclic compound binding;tetrapyrrole binding	bounding membrane of organelle;cellular anatomical entity;chloroplast thylakoid membrane;membrane;membrane protein complex;organelle membrane;organelle outer membrane;outer membrane;photosynthetic membrane;photosystem;photosystem I;photosystem II;plastid membrane;plastid thylakoid membrane;protein-containing complex;thylakoid membrane	cellular process;generation of precursor metabolites and energy;metabolic process;response to abiotic stimulus;response to light stimulus;response to stimulus	cellular anatomical entity;membrane;membrane protein complex;outer membrane;photosystem;protein-containing complex		Chloroa_b-bind		Chlorophyll;Chloroplast;Chromophore;Photosynthesis;PhotosystemI;PhotosystemII;Plastid;Referenceproteome;Thylakoid		GO:0006091;GO:0008152;GO:0009314;GO:0009416;GO:0009628;GO:0009765;GO:0009768;GO:0009987;GO:0044237;GO:0050896	GO:0005488;GO:0016168;GO:0046906;GO:0097159	GO:0009521;GO:0009522;GO:0009523;GO:0009535;GO:0016020;GO:0019867;GO:0031090;GO:0031968;GO:0032991;GO:0034357;GO:0042170;GO:0042651;GO:0055035;GO:0098588;GO:0098796;GO:0110165	GO:0006091;GO:0008152;GO:0009416;GO:0009628;GO:0009987;GO:0050896	GO:0009521;GO:0016020;GO:0019867;GO:0032991;GO:0098796;GO:0110165	8	8	0	32.3	32.3	0	30.984	0	56.224	276350000	213	0	A0A0R0I8Z5	A0A0R0I8Z5	324	GLYMA_09G154700	KRH38736	KRH38736
17.2306	18.071	17.6267	16.8168	17.3005	15.724	16.293	16.2281	16.943	18.4842	17.6707	17.5632				-1		biological process involved in interspecies interaction between organisms;biological regulation;defense response;defense response to other organism;defense response to symbiont;defense response to virus;negative regulation of biological process;negative regulation of biosynthetic process;negative regulation of cellular biosynthetic process;negative regulation of cellular metabolic process;negativ…	binding;catalytic activity;catalytic activity, acting on a nucleic acid;catalytic activity, acting on RNA;endonuclease activity;hydrolase activity;hydrolase activity, acting on ester bonds;nuclease activity;nucleic acid binding;organic cyclic compound binding;RNA endonuclease activity;RNA nuclease activity	cellular anatomical entity;cytoplasm;protein-containing complex;ribonucleoprotein complex	biological process involved in interspecies interaction between organisms;biological regulation;defense response to other organism;regulation of biological process;regulation of metabolic process;regulatory ncRNA-mediated gene silencing;response to biotic stimulus;response to external stimulus;response to stimulus;response to stress	cellular anatomical entity;cytoplasm;protein-containing complex;ribonucleoprotein complex		ArgoL1;ArgoL2;ArgoMid;ArgoN;Gly-rich_Ago1;PAZ;Piwi		Referenceproteome;Repressor;Ribonucleoprotein;RNA-mediatedgenesilencing;Transcription;Transcriptionregulation		GO:0006950;GO:0006952;GO:0009605;GO:0009607;GO:0009615;GO:0009889;GO:0009890;GO:0009892;GO:0010468;GO:0010556;GO:0010558;GO:0010605;GO:0010608;GO:0010629;GO:0016441;GO:0019222;GO:0031047;GO:0031323;GO:0031324;GO:0031326;GO:0031327;GO:0035194;GO:0043207;GO:0044419;GO:0048519;GO:0048523;GO:0050789;GO:0050794;GO:0050896;GO:0051607;GO:0051707;GO:0060255;GO:0065007;GO:0098542;GO:0140546	GO:0003676;GO:0003824;GO:0004518;GO:0004519;GO:0004521;GO:0004540;GO:0005488;GO:0016787;GO:0016788;GO:0097159;GO:0140098;GO:0140640	GO:0005737;GO:0032991;GO:0110165;GO:1990904	GO:0006950;GO:0009605;GO:0009607;GO:0019222;GO:0031047;GO:0044419;GO:0050789;GO:0050896;GO:0065007;GO:0098542	GO:0005737;GO:0032991;GO:0110165;GO:1990904	2	2	2	2.9	2.9	2.9	116.89	0	22.798	1809200	5	5	A0A0R0I9G1;I1MQL3	A0A0R0I9G1;I1MQL3	325	GLYMA_09G167100;GLYMA_16G217300	KRH09472;KRH38925	KRH09472;KRH38925
19.3063	18.7216	18.7699	18.4742	18.6744	18.3447	18.8432	18.5174	18.5196	18.8462	19.0448	18.748				-1		response to stimulus;response to stress	binding;calcium ion binding;calcium-dependent phospholipid binding;cation binding;ion binding;lipid binding;metal ion binding;phospholipid binding	cellular anatomical entity;cytoplasm	response to stimulus;response to stress	cellular anatomical entity;cytoplasm		Annexin		Annexin;Calcium;Calcium/phospholipid-binding;Referenceproteome;Repeat		GO:0006950;GO:0050896	GO:0005488;GO:0005509;GO:0005543;GO:0005544;GO:0008289;GO:0043167;GO:0043169;GO:0046872	GO:0005737;GO:0110165	GO:0006950;GO:0050896	GO:0005737;GO:0110165	5	5	5	22.1	22.1	22.1	35.434	0	21.084	11635000	39	0	C6TLC9;A0A0R0I9M4;I1L417;C6THM2;I1L416;C6T8A9;K7KRD7;C6TNJ9;A0A0R0IHL7	C6TLC9;A0A0R0I9M4;I1L417;C6THM2;I1L416;C6T8A9	326	GLYMA_07G106600;GLYMA_09G171600	KRH39008;KRH39009;KRH39010;KRH39011;KRH48709	KRH39008;KRH39009;KRH39010;KRH39011;KRH48709
[truncated: 1,971 more rows]

## Sheet: Table 2
Significant	#NAME?	Difference	Protein IDs	Majority protein IDs	Protein names	id	ENSG	ENSP	ENST	Symbol color	Symbol type	Symbol size	Show label	Only identified by site	Reverse	Potential contaminant	Taxonomy IDs	Taxonomy names	GOBP name	GOMF name	GOCC name	GOBP slim name	GOCC slim name	KEGG name	Pfam	GSEA	Keywords	Corum	GOBP	GOMF	GOCC	GOBP slim	GOCC slim	Peptides	Razor + unique peptides	Unique peptides	Sequence coverage [%]	Unique + razor sequence coverage [%]	Unique sequence coverage [%]	Mol. weight [kDa]	Q-value	Score	Intensity	MS/MS count	Number Of Imputations	Control 1	Control 2	Control 3	HT-1-1
[truncated: 20 more rows]
[truncated: 8 more columns]

## Sheet: Table 3
Column	Type	Name	Size	Score	P value	Benj. Hoch. FDR	Mean	Median
[truncated: 175 more rows]
